# Supplementary material for: Trappc9 deficiency causes parent-of-origin dependent microcephaly and obesity
Source: PLoS Genet. 2020 Sep 2;16(9):e1008916. doi: 10.1371/journal.pgen.1008916 (PMC7467316; doi:10.1371/journal.pgen.1008916)
Supplement: S1 Data — (XLSX) [file pgen.1008916.s018.xlsx]

## Sheet: OB_B6AlleleRatio
Gene_ID	M1_BULB	M2_BULB	M3_BULB	M4_BULB	M5_BULB	S1_BULB	S2_BULB	S3_BULB	S4_BULB	S5_BULB	B6_EMASE_OB_M_mean	B6_EMASE_OB_S_mean	Associated_Gene_Name	Chromosome_Name	GeneStart.bp.	GeneEnd.bp.	GeneBiotype	Status.gene.
ENSMUSG00000000001	0.48	0.49	0.49	0.49	0.49	0.51	0.51	0.52	0.5	0.52	0.488	0.512	Gnai3	3	108107280	108146146	protein_coding	KNOWN
ENSMUSG00000000056	0.54	0.55	0.5	0.51	0.54	0.52	0.51	0.53	0.55	0.53	0.528	0.528	Narf	11	121237253	121255856	protein_coding	KNOWN
ENSMUSG00000000058	0.53	0.55	0.58	0.52	0.51	0.52	0.52	0.56	0.57	0.55	0.538	0.544	Cav2	6	17281185	17289115	protein_coding	KNOWN
ENSMUSG00000000078	0.68	0.79	0.67	0.77	0.74	0.66	0.71	0.71	0.68	0.69	0.73	0.69	Klf6	13	5861489	5870393	protein_coding	KNOWN
ENSMUSG00000000088	0.49	0.49	0.48	0.5	0.5	0.47	0.45	0.48	0.5	0.5	0.492	0.48	Cox5a	9	57521232	57532424	protein_coding	KNOWN
ENSMUSG00000000093	0.67	0.5	0.59	0.6	0.78	0.52	0.64	0.5	0.47	0.68	0.628	0.562	Tbx2	11	85832551	85841948	protein_coding	KNOWN
ENSMUSG00000000120	0.62	0.62	0.6	0.7	0.52	0.7	0.63	0.62	0.64	0.59	0.612	0.636	Ngfr	11	95568818	95587735	protein_coding	KNOWN
ENSMUSG00000000125	0.5	0.5	0.54	0.45	0.7	0.54	0.4	0.55	0.52	0.55	0.538	0.512	Wnt3	11	103774150	103817957	protein_coding	KNOWN
ENSMUSG00000000127	0.41	0.39	0.44	0.28	0.51	0.43	0.41	0.41	0.44	0.47	0.406	0.432	Fer	17	63896018	64139494	protein_coding	KNOWN
ENSMUSG00000000131	0.48	0.49	0.45	0.54	0.44	0.49	0.49	0.49	0.49	0.47	0.48	0.486	Xpo6	7	126101715	126200501	protein_coding	KNOWN
ENSMUSG00000000134	0.19	0.27	0.24	0.27	0.3	0.39	0.41	0.52	0.28	0.3	0.254	0.38	Tfe3	X	7762560	7775202	protein_coding	KNOWN
ENSMUSG00000000142	0.57	0.46	0.49	0.54	0.64	0.53	0.51	0.51	0.52	0.52	0.54	0.518	Axin2	11	108920349	108950783	protein_coding	KNOWN
ENSMUSG00000000148	0.51	0.48	0.46	0.48	0.49	0.46	0.52	0.52	0.44	0.5	0.484	0.488	Baat1	5	140705011	140719379	protein_coding	KNOWN
ENSMUSG00000000149	0.49	0.44	0.47	0.45	0.47	0.48	0.49	0.43	0.46	0.5	0.464	0.472	Gna12	5	140758408	140830431	protein_coding	KNOWN
ENSMUSG00000000168	0.45	0.47	0.46	0.48	0.47	0.48	0.46	0.46	0.47	0.46	0.466	0.466	Dlat	9	50634633	50659780	protein_coding	KNOWN
ENSMUSG00000000184	0.55	0.57	0.56	0.51	0.47	0.53	0.56	0.54	0.56	0.53	0.532	0.544	Ccnd2	6	127125779	127151048	protein_coding	KNOWN
ENSMUSG00000000194	0.49	0.51	0.51	0.56	0.48	0.47	0.49	0.5	0.51	0.5	0.51	0.494	Gpr107	2	31152316	31219548	protein_coding	KNOWN
ENSMUSG00000000197	0.5	0.58	0.52	0.52	0.53	0.54	0.43	0.49	0.55	0.5	0.53	0.502	Nalcn	14	123276641	123627144	protein_coding	KNOWN
ENSMUSG00000000214	0.54	0.56	0.53	0.53	0.53	0.55	0.55	0.54	0.55	0.55	0.538	0.548	Th	7	142892752	142931128	protein_coding	KNOWN
ENSMUSG00000000223	0.23	0.3	0.3	0.31	0.33	0.51	0.48	0.65	0.34	0.36	0.294	0.468	Drp2	X	134404551	134456573	protein_coding	KNOWN
ENSMUSG00000000247	0.59	0.61	0.62	0.63	0.62	0.58	0.59	0.55	0.59	0.61	0.614	0.584	Lhx2	2	38339281	38369733	protein_coding	KNOWN
ENSMUSG00000000253	0.44	0.41	0.5	0.46	0.52	0.49	0.44	0.42	0.48	0.48	0.466	0.462	Gmpr	13	45507444	45546382	protein_coding	KNOWN
ENSMUSG00000000282	0.54	0.52	0.53	0.53	0.5	0.49	0.53	0.53	0.5	0.55	0.524	0.52	Mnt	11	74830920	74845725	protein_coding	KNOWN
ENSMUSG00000000290	0.44	0.62	0.69	0.44	0.7	0.37	0.54	0.44	0.58	0.63	0.578	0.512	Itgb2	10	77530252	77565708	protein_coding	KNOWN
ENSMUSG00000000295	0.45	0.47	0.5	0.44	0.44	0.44	0.46	0.46	0.48	0.44	0.46	0.456	Hddc2	10	31313382	31328204	protein_coding	KNOWN
ENSMUSG00000000296	0.56	0.59	0.59	0.6	0.66	0.52	0.5	0.58	0.51	0.57	0.6	0.536	Tpd52l1	10	31332380	31445921	protein_coding	KNOWN
ENSMUSG00000000303	0.47	0.43	0.64	0.71	0.57	0.45	0.56	0.6	0.52	0.62	0.564	0.55	Cdh1	8	106603351	106670246	protein_coding	KNOWN
ENSMUSG00000000305	0.56	0.54	0.55	0.51	0.53	0.52	0.56	0.54	0.53	0.55	0.538	0.54	Cdh4	2	179442431	179899373	protein_coding	KNOWN
ENSMUSG00000000317	0.45	0.57	0.61	0.45	0.55	0.69	0.7	0.58	0.52	0.6	0.526	0.618	Bcl6b	11	70224128	70229798	protein_coding	KNOWN
ENSMUSG00000000320	0.93	0.91	0.84	0.9	0.61	0.94	0.89	0.75	0.89	0.84	0.838	0.862	Alox12	11	70241457	70255353	protein_coding	KNOWN
ENSMUSG00000000325	0.56	0.48	0.54	0.58	0.56	0.56	0.51	0.54	0.56	0.6	0.544	0.554	Arvcf	16	18348182	18407076	protein_coding	KNOWN
ENSMUSG00000000326	0.51	0.52	0.54	0.58	0.51	0.51	0.52	0.53	0.51	0.51	0.532	0.516	Comt	16	18406886	18426852	protein_coding	KNOWN
ENSMUSG00000000339	0.5	0.46	0.47	0.53	0.54	0.51	0.48	0.5	0.49	0.5	0.5	0.496	Rtcd1	3	116488963	116508208	protein_coding	KNOWN
ENSMUSG00000000340	0.58	0.52	0.61	0.58	0.52	0.58	0.57	0.56	0.58	0.56	0.562	0.57	Dbt	3	116513070	116549976	protein_coding	KNOWN
ENSMUSG00000000346	0.52	0.49	0.52	0.51	0.5	0.53	0.5	0.5	0.51	0.5	0.508	0.508	Dazap2	15	100615628	100620731	protein_coding	KNOWN
ENSMUSG00000000365	0.89	0.85	1	0.88	0.83	0.73	0.94	0.94	1	0.9	0.89	0.902	Rnf17	14	56402697	56525032	protein_coding	KNOWN
ENSMUSG00000000374	0.49	0.53	0.55	0.54	0.49	0.5	0.51	0.5	0.5	0.51	0.52	0.504	Trappc10	10	78186725	78244642	protein_coding	KNOWN
ENSMUSG00000000384	0.5	0.47	0.52	0.43	0.48	0.5	0.48	0.51	0.5	0.47	0.48	0.492	Tbrg4	11	6615598	6626067	protein_coding	KNOWN
ENSMUSG00000000392	0.56	0.4	0.48	0.6	0.48	0.65	0.69	0.47	0.51	0.46	0.504	0.556	Fap	2	62500943	62574075	protein_coding	KNOWN
ENSMUSG00000000402	0.07	0.25	0.08	0.12	0.11	0.17	0.32	0.43	0.18	0.21	0.126	0.262	Egfl6	X	166523007	166585720	protein_coding	KNOWN
ENSMUSG00000000416	0.47	0.46	0.46	0.49	0.48	0.45	0.49	0.48	0.47	0.49	0.472	0.476	Cttnbp2	6	18366478	18515338	protein_coding	KNOWN
ENSMUSG00000000420	0.48	0.49	0.51	0.49	0.5	0.49	0.48	0.49	0.54	0.48	0.494	0.496	Galnt1	18	24205344	24286818	protein_coding	KNOWN
ENSMUSG00000000439	0.48	0.43	0.41	0.43	0.44	0.44	0.44	0.44	0.46	0.45	0.438	0.446	Mkrn2	6	115601938	115618670	protein_coding	KNOWN
ENSMUSG00000000440	0.57	0.67	0.51	0.57	0.56	0.53	0.48	0.53	0.61	0.61	0.576	0.552	Pparg	6	115361221	115490401	protein_coding	KNOWN
ENSMUSG00000000441	0.53	0.53	0.57	0.51	0.49	0.53	0.53	0.52	0.53	0.53	0.526	0.528	Raf1	6	115618067	115676635	protein_coding	KNOWN
ENSMUSG00000000489	0.48	0.44	0.51	0.5	0.36	0.47	0.52	0.5	0.52	0.52	0.458	0.506	Pdgfb	15	79995900	80014808	protein_coding	KNOWN
ENSMUSG00000000531	0.48	0.41	0.48	0.48	0.51	0.46	0.47	0.47	0.52	0.46	0.472	0.476	Grasp	15	101224207	101232755	protein_coding	KNOWN
ENSMUSG00000000532	0.56	0.57	0.57	0.63	0.56	0.55	0.48	0.54	0.6	0.51	0.578	0.536	Acvr1b	15	101174104	101213678	protein_coding	KNOWN
ENSMUSG00000000538	0.53	0.54	0.53	0.51	0.51	0.53	0.52	0.53	0.53	0.54	0.524	0.53	Tom1l2	11	60226714	60352905	protein_coding	KNOWN
ENSMUSG00000000552	0.46	0.5	0.52	0.5	0.44	0.5	0.54	0.48	0.51	0.53	0.484	0.512	Zfp385a	15	103313895	103340086	protein_coding	KNOWN
ENSMUSG00000000555	0.44	0.57	0.36	0.73	0.29	0.63	0.59	0.65	0.62	0.58	0.478	0.614	Itga5	15	103344289	103366763	protein_coding	KNOWN
ENSMUSG00000000560	0.28	0.29	0.32	0.25	0.3	0.29	0.27	0.27	0.24	0.27	0.288	0.268	Gabra2	5	70961057	71095849	protein_coding	KNOWN
ENSMUSG00000000561	0.48	0.54	0.46	0.52	0.51	0.52	0.52	0.54	0.52	0.5	0.502	0.52	Wdr77	3	105959369	105984600	protein_coding	KNOWN
ENSMUSG00000000563	0.5	0.52	0.5	0.5	0.49	0.51	0.5	0.5	0.5	0.51	0.502	0.504	Atp5f1	3	105942698	105960099	protein_coding	KNOWN
ENSMUSG00000000567	0.55	0.51	0.51	0.52	0.52	0.54	0.52	0.53	0.51	0.52	0.522	0.524	Sox9	11	112782224	112787760	protein_coding	KNOWN
ENSMUSG00000000568	0.47	0.49	0.49	0.46	0.52	0.48	0.5	0.5	0.52	0.48	0.486	0.496	Hnrnpd	5	99958426	99978938	protein_coding	KNOWN
ENSMUSG00000000579	0.61	0.68	0.81	0.75	0.67	0.77	0.76	0.71	0.8	0.74	0.704	0.756	Dynlt1c	17	6601671	6609774	protein_coding	KNOWN
ENSMUSG00000000581	0.48	0.47	0.28	0.48	0.37	0.57	0.51	0.47	0.53	0.39	0.416	0.494	C1d	11	17257579	17269176	protein_coding	KNOWN
ENSMUSG00000000594	0.58	0.53	0.53	0.51	0.51	0.56	0.51	0.57	0.58	0.52	0.532	0.548	Gm2a	11	55098115	55113029	protein_coding	KNOWN
ENSMUSG00000000600	0.54	0.54	0.47	0.49	0.54	0.54	0.53	0.53	0.52	0.5	0.516	0.524	Krit1	5	3803165	3844515	protein_coding	KNOWN
ENSMUSG00000000605	0.61	0.54	0.6	0.6	0.55	0.58	0.59	0.6	0.6	0.58	0.58	0.59	Clcn4-2	7	7282316	7299511	protein_coding	KNOWN
ENSMUSG00000000627	0.51	0.48	0.57	0.53	0.53	0.56	0.5	0.53	0.48	0.53	0.524	0.52	Sema4f	6	82911885	82939769	protein_coding	KNOWN
ENSMUSG00000000628	0.54	0.52	0.52	0.55	0.44	0.48	0.46	0.52	0.42	0.52	0.514	0.48	Hk2	6	82725025	82774454	protein_coding	KNOWN
ENSMUSG00000000631	0.5	0.51	0.53	0.54	0.55	0.51	0.5	0.5	0.51	0.52	0.526	0.508	Myo18a	11	77763246	77865980	protein_coding	KNOWN
ENSMUSG00000000632	0.48	0.47	0.48	0.48	0.45	0.47	0.47	0.48	0.48	0.48	0.472	0.476	Sez6	11	77930800	77979048	protein_coding	KNOWN
ENSMUSG00000000686	0.53	0.38	1	0	0	0.83	0.41	0.56	0.66	0.49	0.382	0.59	Abhd15	11	77515121	77538607	protein_coding	KNOWN
ENSMUSG00000000693	0.65	0.47	0.43	0.51	0.55	0.53	0.52	0.5	0.62	0.55	0.522	0.544	Loxl3	6	83034173	83052562	protein_coding	KNOWN
ENSMUSG00000000708	0.46	0.48	0.45	0.43	0.47	0.47	0.48	0.48	0.51	0.46	0.458	0.48	Kat2b	17	53566861	53672720	protein_coding	KNOWN
ENSMUSG00000000711	0.52	0.51	0.5	0.53	0.55	0.5	0.53	0.53	0.55	0.52	0.522	0.526	Rab5b	10	128677193	128696268	protein_coding	KNOWN
ENSMUSG00000000732	0.53	0.43	0.32	0.43	0.41	0.48	0.46	0.43	0.39	0.45	0.424	0.442	Icosl	10	78069360	78079525	protein_coding	KNOWN
ENSMUSG00000000738	0.53	0.5	0.61	0.52	0.53	0.53	0.54	0.54	0.52	0.52	0.538	0.53	Spg7	8	123062942	123097760	protein_coding	KNOWN
ENSMUSG00000000740	0.44	0.44	0.47	0.45	0.43	0.41	0.47	0.45	0.43	0.46	0.446	0.444	Rpl13	8	123102350	123105244	protein_coding	KNOWN
ENSMUSG00000000743	0.47	0.51	0.51	0.47	0.49	0.49	0.48	0.5	0.51	0.49	0.49	0.494	Chmp1a	8	123204264	123212763	protein_coding	KNOWN
ENSMUSG00000000751	0.53	0.5	0.51	0.48	0.49	0.51	0.51	0.51	0.51	0.52	0.502	0.512	Rpa1	11	75298166	75348324	protein_coding	KNOWN
ENSMUSG00000000753	0.73	0.72	0.79	0.7	0.57	0.73	0.76	0.71	0.75	0.72	0.702	0.734	Serpinf1	11	75409769	75422701	protein_coding	KNOWN
ENSMUSG00000000759	0.53	0.48	0.61	0.51	0.53	0.57	0.49	0.55	0.55	0.53	0.532	0.538	Tubgcp3	8	12614277	12672248	protein_coding	KNOWN
ENSMUSG00000000766	0.37	0.51	0.61	0.66	0.29	0.28	0.53	0.39	0.49	0.29	0.488	0.396	Oprm1	10	6758506	7038198	protein_coding	KNOWN
ENSMUSG00000000776	0.52	0.52	0.58	0.49	0.48	0.53	0.53	0.5	0.49	0.48	0.518	0.506	Polr3d	14	70438748	70443471	protein_coding	KNOWN
ENSMUSG00000000782	0.49	0.6	0.48	0.46	0.52	0.4	0.49	0.5	0.58	0.53	0.51	0.5	Tcf7	11	52252371	52283014	protein_coding	KNOWN
ENSMUSG00000000787	0.31	0.36	0.34	0.37	0.37	0.44	0.44	0.52	0.38	0.38	0.35	0.432	Ddx3x	X	13280970	13294052	protein_coding	KNOWN
ENSMUSG00000000792	0.57	0.56	0.62	0.62	0.58	0.56	0.52	0.55	0.56	0.54	0.59	0.546	Slc5a5	8	70882889	70892757	protein_coding	KNOWN
ENSMUSG00000000794	0.5	0.55	0.25	1	0.33	0.43	0.56	0.61	0.66	0.76	0.526	0.604	Kcnn3	3	89520164	89667761	protein_coding	KNOWN
ENSMUSG00000000804	0.52	0.5	0.48	0.47	0.51	0.49	0.51	0.49	0.51	0.52	0.496	0.504	Usp32	11	84984442	85140161	protein_coding	KNOWN
ENSMUSG00000000811	0.59	0.58	0.46	0.54	0.51	0.53	0.53	0.55	0.54	0.61	0.536	0.552	Txnrd3	6	89643988	89675529	protein_coding	KNOWN
ENSMUSG00000000823	0.5	0.55	0.55	0.43	0.48	0.52	0.49	0.51	0.53	0.53	0.502	0.516	Znf512b	2	181582103	181592803	protein_coding	KNOWN
ENSMUSG00000000826	0.5	0.5	0.51	0.5	0.49	0.5	0.5	0.5	0.5	0.5	0.5	0.5	Dnajc5	2	181520485	181555133	protein_coding	KNOWN
ENSMUSG00000000827	0.49	0.51	0.49	0.5	0.5	0.5	0.46	0.49	0.47	0.52	0.498	0.488	Tpd52l2	2	181497142	181517966	protein_coding	KNOWN
ENSMUSG00000000838	0.19	0.29	0.3	0.3	0.34	0.44	0.41	0.56	0.29	0.3	0.284	0.4	Fmr1	X	68678541	68717963	protein_coding	KNOWN
ENSMUSG00000000861	0.55	0.53	0.52	0.54	0.54	0.5	0.53	0.51	0.53	0.51	0.536	0.516	Bcl11a	11	24078056	24174123	protein_coding	KNOWN
ENSMUSG00000000869	0.52	0.55	0.58	0.53	0.59	0.51	0.55	0.5	0.56	0.48	0.554	0.52	Il4	11	53602982	53618669	protein_coding	KNOWN
ENSMUSG00000000876	0.52	0.52	0.43	0.43	0.49	0.49	0.45	0.49	0.49	0.43	0.478	0.47	Pxmp4	2	154585758	154603708	protein_coding	KNOWN
ENSMUSG00000000881	0.18	0.25	0.27	0.23	0.26	0.43	0.37	0.54	0.29	0.3	0.238	0.386	Dlg3	X	100767722	100818410	protein_coding	KNOWN
ENSMUSG00000000901	0.27	0.09	0.25	0.15	0.71	0.27	0.56	0.37	0.4	0.52	0.294	0.424	Mmp11	10	75923222	75932502	protein_coding	KNOWN
ENSMUSG00000000902	0.51	0.5	0.49	0.49	0.52	0.48	0.53	0.5	0.51	0.52	0.502	0.508	Smarcb1	10	75896769	75921617	protein_coding	KNOWN
ENSMUSG00000000915	0.53	0.51	0.55	0.59	0.55	0.53	0.54	0.53	0.5	0.54	0.546	0.528	Hip1r	5	123973628	124003211	protein_coding	KNOWN
ENSMUSG00000000916	0.48	0.5	0.47	0.49	0.39	0.5	0.51	0.56	0.45	0.49	0.466	0.502	Nsun5	5	135369953	135376805	protein_coding	KNOWN
ENSMUSG00000000934	0.48	0.39	0.37	0.42	0.51	0.42	0.45	0.43	0.45	0.42	0.434	0.434	Top1mt	15	75657035	75678800	protein_coding	KNOWN
ENSMUSG00000000948	1	1	1	1	1	0	0	0	0	0	1	0	Snrpn	7	59982495	60140219	protein_coding	KNOWN
ENSMUSG00000000957	0.47	0.58	0.44	0.57	0.54	0.56	0.47	0.55	0.55	0.54	0.52	0.534	Mmp14	14	54431604	54441258	protein_coding	KNOWN
ENSMUSG00000000958	0.39	0.57	0.19	0.5	0.4	0.61	0.53	0.48	0.44	0.44	0.41	0.5	Slc7a7	14	54369444	54409472	protein_coding	KNOWN
ENSMUSG00000000959	0.47	0.44	0.47	0.46	0.46	0.47	0.48	0.48	0.5	0.48	0.46	0.482	Oxa1l	14	54360841	54369669	protein_coding	KNOWN
ENSMUSG00000000976	0.54	0.5	0.5	0.49	0.52	0.49	0.52	0.5	0.43	0.49	0.51	0.486	Heatr6	11	83753696	83783754	protein_coding	KNOWN
ENSMUSG00000001014	0.2	0.6	0.86	0.52	0.83	0.36	0.85	0.43	0.36	0.5	0.602	0.5	Icam4	9	21029373	21030531	protein_coding	KNOWN
ENSMUSG00000001016	0.45	0.44	0.49	0.45	0.45	0.45	0.43	0.43	0.45	0.43	0.456	0.438	Ilf2	3	90476201	90488379	protein_coding	KNOWN
ENSMUSG00000001018	0.5	0.51	0.5	0.51	0.48	0.5	0.49	0.49	0.47	0.48	0.5	0.486	Snapin	3	90488026	90491033	protein_coding	KNOWN
ENSMUSG00000001023	0.46	0.49	0.47	0.45	0.45	0.47	0.46	0.43	0.43	0.44	0.464	0.446	S100a5	3	90608523	90611780	protein_coding	KNOWN
ENSMUSG00000001025	0.51	0.55	0.63	0.55	0.48	0.52	0.42	0.54	0.49	0.44	0.544	0.482	S100a6	3	90612894	90614414	protein_coding	KNOWN
ENSMUSG00000001029	0.49	0.47	0.32	0.5	0.31	0.63	0.7	0.57	0.54	0.53	0.418	0.594	Icam2	11	106377656	106388075	protein_coding	KNOWN
ENSMUSG00000001034	0.54	0.45	0.57	0.48	0.33	0.46	0.49	0.49	0.49	0.46	0.474	0.478	Mapk7	11	61488812	61494406	protein_coding	KNOWN
ENSMUSG00000001039	0.37	0.25	0.27	0.3	0.33	0.35	0.33	0.32	0.3	0.29	0.304	0.318	B9d1	11	61505144	61512931	protein_coding	KNOWN
ENSMUSG00000001052	0.49	0.53	0.53	0.52	0.52	0.52	0.53	0.52	0.52	0.48	0.518	0.514	Sec24b	3	129982759	130061553	protein_coding	KNOWN
ENSMUSG00000001053	0.53	0.36	0.46	0.46	0.5	0.59	0.55	0.43	0.36	0.68	0.462	0.522	N4bp3	11	51643063	51650842	protein_coding	KNOWN
ENSMUSG00000001056	0.48	0.48	0.46	0.49	0.47	0.53	0.4	0.55	0.46	0.54	0.476	0.496	Nhp2	11	51619735	51623714	protein_coding	KNOWN
ENSMUSG00000001062	0.52	0.53	0.56	0.55	0.51	0.53	0.5	0.5	0.49	0.52	0.534	0.508	1300018I17Rik	8	123242356	123254348	protein_coding	NOVEL
ENSMUSG00000001065	0.49	0.49	0.63	0.48	0.47	0.52	0.55	0.54	0.52	0.45	0.512	0.516	Zfp276	8	123254195	123269745	protein_coding	KNOWN
ENSMUSG00000001082	0.42	0.42	0.5	0.43	0.54	0.53	0.53	0.52	0.48	0.47	0.462	0.506	Mfsd10	5	34633642	34637212	protein_coding	KNOWN
ENSMUSG00000001098	0.43	0.45	0.5	0.45	0.44	0.45	0.46	0.47	0.45	0.46	0.454	0.458	Kctd10	5	114363567	114380515	protein_coding	KNOWN
ENSMUSG00000001100	0.48	0.52	0.51	0.49	0.52	0.51	0.51	0.5	0.51	0.5	0.504	0.506	Poldip2	11	78512193	78522736	protein_coding	KNOWN
ENSMUSG00000001105	0.45	0.5	0.39	0.53	0.51	0.46	0.38	0.43	0.46	0.44	0.476	0.434	Ift20	11	78536361	78541737	protein_coding	KNOWN
ENSMUSG00000001119	0.47	0.49	0.49	0.47	0.45	0.46	0.46	0.48	0.49	0.47	0.474	0.472	Col6a1	10	76708792	76726168	protein_coding	KNOWN
ENSMUSG00000001120	0.53	0.54	0.59	0.53	0.57	0.54	0.55	0.54	0.54	0.56	0.552	0.546	Pcbp3	10	76761857	76961887	protein_coding	KNOWN
ENSMUSG00000001123	0.52	0.37	0.61	0.55	0.42	0.58	0.61	0.59	0.56	0.55	0.494	0.578	Lgals9	11	78962974	78984946	protein_coding	KNOWN
ENSMUSG00000001127	0.16	0.23	0.25	0.23	0.31	0.38	0.38	0.54	0.29	0.3	0.236	0.378	Araf	X	20797814	20860519	protein_coding	KNOWN
ENSMUSG00000001128	0.17	0.05	0.14	0.31	0.06	0.42	0.42	0.47	0.25	0.38	0.146	0.388	Cfp	X	20925454	20931555	protein_coding	KNOWN
ENSMUSG00000001134	0.22	0.06	0.29	0.25	0.27	0.4	0.36	0.61	0.23	0.38	0.218	0.396	Uxt	X	20941722	20962017	protein_coding	KNOWN
ENSMUSG00000001143	0.54	0.54	0.49	0.6	0.58	0.5	0.53	0.51	0.53	0.5	0.55	0.514	Lman2l	1	36422065	36445271	protein_coding	KNOWN
ENSMUSG00000001150	0.51	0.51	0.61	0.52	0.51	0.53	0.51	0.53	0.47	0.54	0.532	0.516	Mcm3ap	10	76468971	76515856	protein_coding	KNOWN
ENSMUSG00000001151	0.55	0.58	0.49	0.5	0.56	0.53	0.52	0.54	0.48	0.48	0.536	0.51	Pcnt	10	76351254	76442912	protein_coding	KNOWN
ENSMUSG00000001156	0.48	0.51	0.45	0.47	0.51	0.5	0.53	0.46	0.5	0.47	0.484	0.492	Mxd1	6	86647044	86669159	protein_coding	KNOWN
ENSMUSG00000001157	0.54	0.53	0.46	0.55	0.49	0.47	0.49	0.5	0.53	0.51	0.514	0.5	Gmcl1	6	86691768	86733378	protein_coding	KNOWN
ENSMUSG00000001166	0.72	0.43	0.33	0.5	0.46	0.75	0.54	0.67	0.68	0.44	0.488	0.616	Oas1c	5	120800194	120812514	protein_coding	KNOWN
ENSMUSG00000001173	0.16	0.2	0.21	0.22	0.26	0.38	0.37	0.49	0.25	0.29	0.21	0.356	Ocrl	X	47912387	47965868	protein_coding	KNOWN
ENSMUSG00000001175	0.51	0.5	0.5	0.49	0.49	0.51	0.51	0.5	0.5	0.5	0.498	0.504	Calm1	12	100199435	100209806	protein_coding	KNOWN
ENSMUSG00000001211	0.48	0.48	0.49	0.46	0.48	0.47	0.46	0.47	0.46	0.48	0.478	0.468	Agpat3	10	78269178	78352489	protein_coding	KNOWN
ENSMUSG00000001229	0.51	0.51	0.54	0.52	0.52	0.53	0.49	0.5	0.53	0.51	0.52	0.512	Dpp9	17	56186682	56218889	protein_coding	KNOWN
ENSMUSG00000001240	0.51	0.45	0.52	0.46	0.4	0.49	0.46	0.47	0.48	0.47	0.468	0.474	Ramp2	11	101246028	101259546	protein_coding	KNOWN
ENSMUSG00000001247	0.56	0.5	0.52	0.53	0.53	0.58	0.6	0.63	0.57	0.7	0.528	0.616	Lsr	7	30957409	30983169	protein_coding	KNOWN
ENSMUSG00000001248	0.51	0.51	0.56	0.52	0.5	0.5	0.49	0.47	0.5	0.51	0.52	0.494	Gramd1a	7	31130127	31151050	protein_coding	KNOWN
ENSMUSG00000001260	0.4	0.45	0.42	0.44	0.44	0.4	0.42	0.45	0.45	0.43	0.43	0.43	Gabrg1	5	70751047	70842617	protein_coding	KNOWN
ENSMUSG00000001270	0.54	0.54	0.54	0.52	0.54	0.54	0.54	0.54	0.54	0.54	0.536	0.54	Ckb	12	111669355	111672338	protein_coding	KNOWN
ENSMUSG00000001280	0.52	0.49	0.59	0.4	0.5	0.53	0.53	0.54	0.54	0.5	0.5	0.528	Sp1	15	102406143	102436404	protein_coding	KNOWN
ENSMUSG00000001300	0.44	0.48	0.51	0.46	0.49	0.49	0.5	0.5	0.51	0.47	0.476	0.494	Efnb2	8	8617434	8660773	protein_coding	KNOWN
ENSMUSG00000001305	0.46	0.46	0.46	0.49	0.64	0.38	0.5	0.49	0.45	0.45	0.502	0.454	Rrp15	1	186720978	186749358	protein_coding	KNOWN
ENSMUSG00000001313	0.37	0.37	0.38	0.39	0.4	0.43	0.45	0.37	0.37	0.4	0.382	0.404	Rnd2	11	101464999	101471853	protein_coding	KNOWN
ENSMUSG00000001334	0.57	0.56	0.54	0.59	0.57	0.59	0.57	0.57	0.56	0.57	0.566	0.572	Fndc5	4	129136999	129144593	protein_coding	KNOWN
ENSMUSG00000001379	0.52	0.45	0.67	0.52	0.73	0.4	0.49	0.5	0.44	0.51	0.578	0.468	Apbb3	18	36671160	36679366	protein_coding	KNOWN
ENSMUSG00000001380	0.53	0.53	0.55	0.52	0.57	0.55	0.53	0.53	0.55	0.54	0.54	0.54	Hars	18	36766530	36783205	protein_coding	KNOWN
ENSMUSG00000001383	0.35	0.34	0.38	0.37	0.46	0.36	0.38	0.32	0.34	0.38	0.38	0.356	Zmat2	18	36793923	36799660	protein_coding	KNOWN
ENSMUSG00000001415	0.49	0.51	0.49	0.51	0.54	0.5	0.49	0.5	0.49	0.5	0.508	0.496	Smg5	3	88336260	88362337	protein_coding	KNOWN
ENSMUSG00000001416	0.5	0.51	0.5	0.5	0.51	0.5	0.5	0.5	0.49	0.5	0.504	0.498	Cct3	3	88297116	88321767	protein_coding	KNOWN
ENSMUSG00000001418	0.48	0.42	0.39	0.47	0.59	0.58	0.48	0.46	0.63	0.51	0.47	0.532	0610031J06Rik	3	88325023	88331313	protein_coding	KNOWN
ENSMUSG00000001419	0.52	0.55	0.49	0.52	0.48	0.51	0.52	0.51	0.51	0.52	0.512	0.514	Mef2d	3	88142372	88172086	protein_coding	KNOWN
ENSMUSG00000001424	0.47	0.57	0.52	0.51	0.54	0.51	0.55	0.53	0.54	0.55	0.522	0.536	Snd1	6	28475139	28935162	protein_coding	KNOWN
ENSMUSG00000001440	0.48	0.46	0.48	0.48	0.47	0.51	0.49	0.48	0.5	0.5	0.474	0.496	Kpnb1	11	97159714	97187881	protein_coding	KNOWN
ENSMUSG00000001441	0.49	0.51	0.5	0.5	0.51	0.49	0.5	0.52	0.5	0.5	0.502	0.502	Npepps	11	97205842	97280638	protein_coding	KNOWN
ENSMUSG00000001444	0.52	0.53	0.59	0.52	0.56	0.58	0.57	0.54	0.56	0.52	0.544	0.554	Tbx21	11	97098071	97115331	protein_coding	KNOWN
ENSMUSG00000001445	0.44	0.41	0.41	0.4	0.43	0.41	0.4	0.42	0.43	0.42	0.418	0.416	Mrpl10	11	97041560	97049213	protein_coding	KNOWN
ENSMUSG00000001467	0.53	0.53	0.5	0.53	0.5	0.53	0.52	0.52	0.52	0.51	0.518	0.52	Cyp51	5	4081145	4104746	protein_coding	KNOWN
ENSMUSG00000001472	0.51	0.48	0.5	0.49	0.5	0.47	0.49	0.48	0.47	0.49	0.496	0.48	Tcf25	8	123373824	123404173	protein_coding	KNOWN
ENSMUSG00000001473	0.61	0.52	0.6	0.52	0.56	0.59	0.59	0.58	0.57	0.56	0.562	0.578	Tubb6	18	67390717	67402748	protein_coding	KNOWN
ENSMUSG00000001493	0.5	0.61	0.53	0.45	0.86	0.6	0.7	0.77	0.61	0.65	0.59	0.666	Meox1	11	101877510	101894374	protein_coding	KNOWN
ENSMUSG00000001506	0.5	0.51	0.38	0.53	0.5	0.47	0.45	0.44	0.49	0.51	0.484	0.472	Col1a1	11	94936224	94953042	protein_coding	KNOWN
ENSMUSG00000001507	0.54	0.52	0.53	0.48	0.5	0.52	0.47	0.49	0.48	0.5	0.514	0.492	Itga3	11	95044474	95076801	protein_coding	KNOWN
ENSMUSG00000001517	0.57	0.25	0.8	0.63	0.23	0.46	0.51	0.52	0.51	0.2	0.496	0.44	Foxm1	6	128362967	128375893	protein_coding	KNOWN
ENSMUSG00000001518	0.63	0.59	0.58	0.64	0.64	0.64	0.57	0.62	0.62	0.6	0.616	0.61	Itfg2	6	128409444	128424931	protein_coding	KNOWN
ENSMUSG00000001520	0.63	0.61	0.62	0.65	0.62	0.65	0.63	0.62	0.6	0.62	0.626	0.624	Nrip2	6	128399296	128408932	protein_coding	KNOWN
ENSMUSG00000001521	0.47	0.5	0.45	0.53	0.48	0.5	0.49	0.46	0.48	0.47	0.486	0.48	Tulp3	6	128321140	128355851	protein_coding	KNOWN
ENSMUSG00000001525	0.53	0.46	0.64	0.56	0.62	0.54	0.56	0.49	0.51	0.52	0.562	0.524	Tubb5	17	35833926	35838306	protein_coding	KNOWN
ENSMUSG00000001542	0.47	0.55	0.5	0.47	0.59	0.55	0.56	0.5	0.52	0.48	0.516	0.522	Ell2	13	75707484	75772356	protein_coding	KNOWN
ENSMUSG00000001552	0.49	0.52	0.53	0.54	0.52	0.49	0.49	0.51	0.51	0.51	0.52	0.502	Jup	11	100368958	100397763	protein_coding	KNOWN
ENSMUSG00000001555	0.59	0.65	0.57	0.58	0.48	0.51	0.57	0.51	0.55	0.61	0.574	0.55	Fkbp10	11	100415697	100424824	protein_coding	KNOWN
ENSMUSG00000001558	0.1	0.17	0	0.1	0	0.06	0	0.2	0.13	0.06	0.074	0.09	Klhl10	11	100441917	100457022	protein_coding	KNOWN
ENSMUSG00000001569	0.57	0.5	0.52	0.52	0.54	0.48	0.51	0.55	0.53	0.55	0.53	0.524	Nom1	5	29434664	29453506	protein_coding	KNOWN
ENSMUSG00000001576	0.53	0.52	0.52	0.55	0.54	0.53	0.54	0.53	0.54	0.52	0.532	0.532	Ergic1	17	26561489	26656931	protein_coding	KNOWN
ENSMUSG00000001627	0.53	0.58	0.49	0.5	0.48	0.48	0.56	0.49	0.45	0.5	0.516	0.496	Ifrd1	12	40201567	40248504	protein_coding	KNOWN
ENSMUSG00000001630	0.61	0.63	0.57	0.58	0.62	0.62	0.61	0.6	0.61	0.62	0.602	0.612	Stk38l	6	146724995	146778812	protein_coding	KNOWN
ENSMUSG00000001642	0.48	0.42	0.46	0.44	0.4	0.48	0.47	0.51	0.47	0.49	0.44	0.484	Akr1b3	6	34303934	34317497	protein_coding	KNOWN
ENSMUSG00000001663	0.7	0.61	0.45	0.66	0.65	0.69	0.69	0.63	0.68	0.66	0.614	0.67	Gstt1	10	75783813	75798584	protein_coding	KNOWN
ENSMUSG00000001665	0.64	0.62	0.38	0.47	0.39	0.48	0.59	0.49	0.55	0.61	0.5	0.544	Gstt3	10	75774115	75781414	protein_coding	KNOWN
ENSMUSG00000001666	0.53	0.52	0.59	0.58	0.55	0.53	0.53	0.59	0.57	0.56	0.554	0.556	Ddt	10	75771230	75773414	protein_coding	KNOWN
ENSMUSG00000001672	0.56	1	0.83	0.16	0.53	0.72	1	0.74	0.89	0.62	0.616	0.794	Marveld3	8	109947914	109962203	protein_coding	KNOWN
ENSMUSG00000001674	0.46	0.51	0.5	0.43	0.47	0.44	0.43	0.45	0.46	0.45	0.474	0.446	Ddx18	1	121553835	121567989	protein_coding	KNOWN
ENSMUSG00000001687	0.49	0.49	0.49	0.52	0.49	0.48	0.49	0.49	0.48	0.48	0.496	0.484	Ubl3	5	148504631	148552789	protein_coding	KNOWN
ENSMUSG00000001700	0.47	0.62	0.53	0.53	0.56	0.48	0.48	0.51	0.43	0.54	0.542	0.488	Gramd3	18	56432132	56503792	protein_coding	KNOWN
ENSMUSG00000001707	0.45	0.42	0.61	0.55	0.43	0.54	0.46	0.44	0.49	0.46	0.492	0.478	Eef1e1	13	38645698	38659028	protein_coding	KNOWN
ENSMUSG00000001729	0.49	0.53	0.51	0.49	0.49	0.52	0.51	0.49	0.49	0.49	0.502	0.5	Akt1	12	112653821	112674884	protein_coding	KNOWN
ENSMUSG00000001751	0.51	0.52	0.55	0.6	0.62	0.62	0.43	0.52	0.51	0.52	0.56	0.52	Naglu	11	101070012	101077672	protein_coding	KNOWN
ENSMUSG00000001755	0.53	0.53	0.47	0.55	0.51	0.53	0.48	0.53	0.55	0.47	0.518	0.512	Coasy	11	101082565	101086619	protein_coding	KNOWN
ENSMUSG00000001761	0.51	0.55	0.49	0.5	0.51	0.53	0.51	0.53	0.58	0.52	0.512	0.534	Smo	6	29735694	29761365	protein_coding	KNOWN
ENSMUSG00000001763	0.54	0.52	0.47	0.49	0.39	0.46	0.45	0.48	0.52	0.53	0.482	0.488	Tspan33	6	29694222	29718559	protein_coding	KNOWN
ENSMUSG00000001767	0.46	0.49	0.47	0.48	0.52	0.48	0.44	0.5	0.45	0.48	0.484	0.47	Crnkl1	2	145917479	145935014	protein_coding	KNOWN
ENSMUSG00000001773	0.53	0.49	0.46	0.49	0.49	0.54	0.43	0.49	0.47	0.5	0.492	0.486	Folh1	7	86719352	86775864	protein_coding	KNOWN
ENSMUSG00000001774	0.53	0.56	0.56	0.55	0.52	0.55	0.53	0.57	0.6	0.48	0.544	0.546	Chordc1	9	18292267	18314000	protein_coding	KNOWN
ENSMUSG00000001783	0.47	0.49	0.51	0.48	0.41	0.49	0.42	0.51	0.47	0.4	0.472	0.458	D10Wsu52e	10	85938637	85957823	protein_coding	KNOWN
ENSMUSG00000001785	0.51	0.47	0.51	0.61	0.6	0.56	0.59	0.54	0.55	0.45	0.54	0.538	Pwp1	10	85871831	85889096	protein_coding	KNOWN
ENSMUSG00000001794	0.54	0.56	0.52	0.55	0.56	0.55	0.54	0.54	0.55	0.56	0.546	0.548	Capns1	7	30186942	30195164	protein_coding	KNOWN
ENSMUSG00000001802	0.5	0.49	0.47	0.47	0.52	0.47	0.49	0.49	0.48	0.52	0.49	0.49	Lrp3	7	35200027	35215370	protein_coding	KNOWN
ENSMUSG00000001829	0.57	0.47	0.55	0.5	0.49	0.55	0.57	0.55	0.54	0.54	0.516	0.55	Clpb	7	101663633	101790168	protein_coding	KNOWN
ENSMUSG00000001844	0.41	0.51	0.5	0.43	0.51	0.48	0.45	0.47	0.49	0.46	0.472	0.47	Zdhhc4	5	143316489	143329256	protein_coding	KNOWN
ENSMUSG00000001847	0.48	0.47	0.48	0.49	0.5	0.49	0.49	0.49	0.5	0.49	0.484	0.492	Rac1	5	143505478	143528036	protein_coding	KNOWN
ENSMUSG00000001891	0.49	0.51	0.46	0.48	0.5	0.48	0.52	0.51	0.5	0.53	0.488	0.508	Ugp2	11	21321138	21371201	protein_coding	KNOWN
ENSMUSG00000001901	0.52	0.34	0.56	0.34	0.33	0.49	0.42	0.5	0.39	0.51	0.418	0.462	Kcnh6	11	106008124	106034549	protein_coding	KNOWN
ENSMUSG00000001909	0.61	0.55	0.55	0.55	0.52	0.55	0.53	0.57	0.56	0.54	0.556	0.55	Trmt1	8	84686307	84699808	protein_coding	KNOWN
ENSMUSG00000001910	0.54	0.53	0.5	0.52	0.48	0.51	0.51	0.53	0.53	0.52	0.514	0.52	Nacc1	8	84670483	84687862	protein_coding	KNOWN
ENSMUSG00000001911	0.46	0.47	0.46	0.44	0.54	0.47	0.48	0.49	0.48	0.51	0.474	0.486	Nfix	8	84699876	84800344	protein_coding	KNOWN
ENSMUSG00000001918	0.6	0.7	0.57	0.62	0.62	0.52	0.55	0.5	0.54	0.52	0.622	0.526	Slc1a5	7	16781346	16798274	protein_coding	KNOWN
ENSMUSG00000001924	0.16	0.26	0.24	0.23	0.29	0.4	0.39	0.54	0.27	0.3	0.236	0.38	Uba1	X	20658326	20683179	protein_coding	KNOWN
ENSMUSG00000001942	0.58	0.61	0.59	0.62	0.49	0.6	0.58	0.59	0.66	0.58	0.578	0.602	Siae	9	37613847	37648318	protein_coding	KNOWN
ENSMUSG00000001946	0.66	0.5	0.49	0.5	0.55	0.5	0.48	0.52	0.45	0.55	0.54	0.5	Esam	9	37528078	37538319	protein_coding	KNOWN
ENSMUSG00000001948	0.69	0.87	1	0.49	0.88	0.83	0.73	0.86	1	0.62	0.786	0.808	Spa17	9	37603295	37613720	protein_coding	KNOWN
ENSMUSG00000001962	0.16	0.21	0.31	0.24	0.26	0.37	0.47	0.47	0.22	0.24	0.236	0.354	Fam50a	X	74313033	74320149	protein_coding	KNOWN
ENSMUSG00000001964	0.24	0.19	0.23	0.26	0.17	0.48	0.35	0.56	0.38	0.33	0.218	0.42	Emd	X	74254687	74261548	protein_coding	KNOWN
ENSMUSG00000001983	0.62	0.63	0.56	0.5	0.6	0.55	0.57	0.56	0.61	0.57	0.582	0.572	Taco1	11	106066061	106073612	protein_coding	KNOWN
ENSMUSG00000001985	0.51	0.48	0.5	0.48	0.49	0.5	0.51	0.5	0.49	0.49	0.492	0.498	Grik3	4	125490700	125714173	protein_coding	KNOWN
ENSMUSG00000001986	0.25	0.32	0.29	0.29	0.29	0.46	0.42	0.55	0.35	0.32	0.288	0.42	Gria3	X	41400854	41678601	protein_coding	KNOWN
ENSMUSG00000001988	0.09	0.71	0.58	0.33	0.6	0.38	0.55	0.5	0.27	0.5	0.462	0.44	Npas1	7	16455721	16476780	protein_coding	KNOWN
ENSMUSG00000001995	0.48	0.5	0.5	0.49	0.5	0.48	0.52	0.51	0.54	0.51	0.494	0.512	Sipa1l2	8	125418063	125492710	protein_coding	KNOWN
ENSMUSG00000001998	0.52	0.42	0.55	0.48	0.56	0.44	0.59	0.51	0.44	0.51	0.506	0.498	Ap4e1	2	127008717	127067909	protein_coding	KNOWN
ENSMUSG00000001999	0.48	0.44	0.43	0.46	0.46	0.5	0.48	0.48	0.48	0.44	0.454	0.476	Blvra	2	127070665	127097084	protein_coding	KNOWN
ENSMUSG00000002010	0.17	0.23	0.23	0.22	0.3	0.39	0.37	0.52	0.27	0.29	0.23	0.368	Idh3g	X	73778963	73786897	protein_coding	KNOWN
ENSMUSG00000002015	0.2	0.31	0.25	0.25	0.3	0.43	0.41	0.59	0.33	0.32	0.262	0.416	Bcap31	X	73686178	73716175	protein_coding	KNOWN
ENSMUSG00000002020	0.5	0.51	0.54	0.49	0.51	0.52	0.55	0.52	0.48	0.5	0.51	0.514	Ltbp2	12	84783212	84876532	protein_coding	KNOWN
ENSMUSG00000002031	0.6	0.61	0.62	0.58	0.55	0.58	0.57	0.62	0.65	0.63	0.592	0.61	Ift46	9	44767908	44792714	protein_coding	KNOWN
ENSMUSG00000002043	0.37	0.35	0.4	0.32	0.48	0.33	0.35	0.36	0.41	0.31	0.384	0.352	Trappc6a	7	19508670	19516145	protein_coding	KNOWN
ENSMUSG00000002052	0.57	0.58	0.57	0.6	0.57	0.58	0.54	0.57	0.58	0.56	0.578	0.566	Supt6h	11	78206746	78245987	protein_coding	KNOWN
ENSMUSG00000002055	0.61	0.36	0.75	0.48	0.59	0.68	0.36	0.61	0.51	0.46	0.558	0.524	Spag5	11	78301529	78322457	protein_coding	KNOWN
ENSMUSG00000002059	0.58	0.58	0.61	0.59	0.49	0.56	0.56	0.48	0.54	0.58	0.57	0.544	Rab34	11	78188430	78192193	protein_coding	KNOWN
ENSMUSG00000002064	0.52	0.53	0.53	0.51	0.5	0.52	0.53	0.52	0.52	0.53	0.518	0.524	Sdf2	11	78245746	78255496	protein_coding	KNOWN
ENSMUSG00000002068	0.43	0.53	0.5	0.44	0.4	0.65	0.48	0.61	0.45	0.49	0.46	0.536	Ccne1	7	38097984	38107534	protein_coding	KNOWN
ENSMUSG00000002076	0.06	0.42	0.1	0.31	0.35	0.22	0.17	0.04	0.14	0.18	0.248	0.15	Hsf2bp	17	31944769	32034508	protein_coding	KNOWN
ENSMUSG00000002083	0.31	0.34	0.27	0.24	0.35	0.29	0.3	0.29	0.23	0.2	0.302	0.262	Bbc3	7	16309616	16318205	protein_coding	KNOWN
ENSMUSG00000002102	0.46	0.48	0.49	0.48	0.46	0.48	0.47	0.48	0.49	0.47	0.474	0.478	Psmc3	2	91054009	91066369	protein_coding	KNOWN
ENSMUSG00000002103	0.53	0.49	0.5	0.48	0.47	0.53	0.53	0.46	0.49	0.5	0.494	0.502	Acp2	2	91202885	91214098	protein_coding	KNOWN
ENSMUSG00000002105	0.57	0.52	0.51	0.49	0.6	0.55	0.54	0.52	0.57	0.5	0.538	0.536	Slc39a13	2	91061791	91070417	protein_coding	KNOWN
ENSMUSG00000002107	0.48	0.49	0.48	0.53	0.51	0.48	0.48	0.49	0.48	0.48	0.498	0.482	Celf2	2	6539705	7081302	protein_coding	KNOWN
ENSMUSG00000002111	0.41	0.28	0.51	0.5	0.55	0.51	0.62	0.39	0.56	0.44	0.45	0.504	Sfpi1	2	91082390	91115756	protein_coding	KNOWN
ENSMUSG00000002129	0.52	0.54	0.52	0.5	0.49	0.53	0.52	0.53	0.54	0.54	0.514	0.532	Sf3a1	11	4160350	4182541	protein_coding	KNOWN
ENSMUSG00000002147	0.52	0.54	0.54	0.47	0.51	0.51	0.54	0.44	0.51	0.51	0.516	0.502	Stat6	10	127642986	127660957	protein_coding	KNOWN
ENSMUSG00000002190	0.48	0.47	0.62	0.51	0.54	0.52	0.47	0.48	0.49	0.45	0.524	0.482	Clgn	8	83389867	83428552	protein_coding	KNOWN
ENSMUSG00000002205	0.44	0.53	0.46	0.49	0.49	0.45	0.48	0.47	0.48	0.5	0.482	0.476	Vrk3	7	44748413	44777515	protein_coding	KNOWN
ENSMUSG00000002210	0.56	0.52	0.53	0.6	0.55	0.51	0.52	0.52	0.54	0.5	0.552	0.518	1500002O20Rik	7	24399619	24422778	protein_coding	KNOWN
ENSMUSG00000002221	0.52	0.54	0.55	0.53	0.57	0.52	0.52	0.53	0.56	0.51	0.542	0.528	Paxip1	5	27740667	27791339	protein_coding	KNOWN
ENSMUSG00000002222	0.48	0.49	0.48	0.45	0.51	0.49	0.51	0.5	0.49	0.49	0.482	0.496	Rmnd5a	6	71388634	71440637	protein_coding	KNOWN
ENSMUSG00000002228	0.46	0.48	0.41	0.45	0.42	0.46	0.5	0.47	0.47	0.5	0.444	0.48	Ppm1j	3	104781056	104786018	protein_coding	KNOWN
ENSMUSG00000002233	0.54	0.48	0.51	0.53	0.46	0.54	0.45	0.49	0.46	0.47	0.504	0.482	Rhoc	3	104789011	104794459	protein_coding	KNOWN
ENSMUSG00000002250	0.44	0.48	0.48	0.46	0.48	0.52	0.5	0.45	0.49	0.49	0.468	0.49	Ppard	17	28232754	28301469	protein_coding	KNOWN
ENSMUSG00000002257	0.41	0.57	0.43	0.41	0.49	0.52	0.43	0.44	0.41	0.41	0.462	0.442	Def6	17	28207778	28228608	protein_coding	KNOWN
ENSMUSG00000002265	1	1	1	1	0.99	0.08	0	0.07	0	0	0.998	0.03	Peg3	7	6703892	6730421	protein_coding	KNOWN
ENSMUSG00000002266	0.25	0.31	0.11	0.27	0.5	0.65	0.63	0.65	0.69	0.57	0.288	0.638	Zim1	7	6675443	6696450	protein_coding	KNOWN
ENSMUSG00000002274	0.52	0.54	0.5	0.52	0.5	0.52	0.51	0.52	0.49	0.5	0.516	0.508	Metrn	17	25794571	25797136	protein_coding	KNOWN
ENSMUSG00000002279	0.59	0.66	0.56	0.48	0.64	0.5	0.57	0.56	0.47	0.58	0.586	0.536	Lmf1	17	25579174	25662826	protein_coding	KNOWN
ENSMUSG00000002308	0.51	0.43	0.46	0.42	0.34	0.4	0.41	0.46	0.43	0.42	0.432	0.424	Cd320	17	33843091	33849774	protein_coding	KNOWN
ENSMUSG00000002319	0.51	0.44	0.49	0.47	0.48	0.49	0.48	0.45	0.5	0.46	0.478	0.476	Ipo4	14	55625400	55637895	protein_coding	KNOWN
ENSMUSG00000002320	0.46	0.55	0.51	0.53	0.45	0.54	0.43	0.48	0.5	0.49	0.5	0.488	Tm9sf1	14	55635965	55643806	protein_coding	KNOWN
ENSMUSG00000002324	0.94	1	1	0.97	0.98	1	0.96	0.99	0.99	1	0.978	0.988	Rec8	14	55618037	55625395	protein_coding	KNOWN
ENSMUSG00000002325	0.47	0.53	0.64	0.55	0.53	0.45	0.46	0.47	0.41	0.5	0.544	0.458	Irf9	14	55603571	55610030	protein_coding	KNOWN
ENSMUSG00000002326	0.56	0.46	0.44	0.57	0.32	0.47	0.53	0.56	0.49	0.47	0.47	0.504	Gmpr2	14	55672235	55678750	protein_coding	KNOWN
ENSMUSG00000002329	0.51	0.48	0.51	0.48	0.48	0.49	0.52	0.49	0.46	0.48	0.492	0.488	Mdp1	14	55657879	55660508	protein_coding	KNOWN
ENSMUSG00000002332	0.56	0.49	0.55	0.52	0.59	0.52	0.53	0.54	0.5	0.46	0.542	0.51	Dhrs1	14	55739020	55745690	protein_coding	KNOWN
ENSMUSG00000002341	0.51	0.51	0.52	0.54	0.5	0.5	0.51	0.51	0.52	0.5	0.516	0.508	Ncan	8	70093085	70120873	protein_coding	KNOWN
ENSMUSG00000002342	0.44	0.4	0.5	0.43	0.45	0.46	0.4	0.44	0.45	0.49	0.444	0.448	Tmem161a	8	70172356	70183681	protein_coding	KNOWN
ENSMUSG00000002343	0.61	0.59	0.7	0.59	0.63	0.55	0.59	0.47	0.53	0.55	0.624	0.538	Armc6	8	70220172	70234466	protein_coding	KNOWN
ENSMUSG00000002345	0.53	0.53	0.54	0.56	0.48	0.49	0.55	0.54	0.55	0.59	0.528	0.544	2310045N01Rik	8	70139499	70167488	protein_coding	KNOWN
ENSMUSG00000002346	0.47	0.45	0.44	0.39	0.39	0.47	0.38	0.4	0.43	0.4	0.428	0.416	Slc25a42	8	70184340	70212305	protein_coding	KNOWN
ENSMUSG00000002365	0.42	0.49	0.44	0.54	0.46	0.52	0.49	0.44	0.45	0.45	0.47	0.47	Snx9	17	5841328	5931033	protein_coding	KNOWN
ENSMUSG00000002372	0.47	0.5	0.38	0.52	0.41	0.49	0.54	0.5	0.48	0.49	0.456	0.5	Ranbp3	17	56673225	56711769	protein_coding	KNOWN
ENSMUSG00000002379	0.36	0.33	0.33	0.37	0.28	0.45	0.38	0.41	0.39	0.42	0.334	0.41	Ndufa11	17	56717762	56724248	protein_coding	KNOWN
ENSMUSG00000002393	0.49	0.54	0.48	0.49	0.49	0.47	0.52	0.51	0.53	0.5	0.498	0.506	Nr2f6	8	71374123	71381960	protein_coding	KNOWN
ENSMUSG00000002395	0.46	0.47	0.5	0.5	0.52	0.54	0.49	0.45	0.52	0.48	0.49	0.496	Use1	8	71366848	71369732	protein_coding	KNOWN
ENSMUSG00000002396	0.48	0.46	0.48	0.34	0.48	0.5	0.51	0.47	0.65	0.54	0.448	0.534	Ocel1	8	71371298	71379361	protein_coding	KNOWN
ENSMUSG00000002413	0.47	0.49	0.46	0.49	0.46	0.47	0.48	0.45	0.47	0.46	0.474	0.466	Braf	6	39603237	39725463	protein_coding	KNOWN
ENSMUSG00000002416	0.51	0.5	0.5	0.47	0.48	0.49	0.48	0.48	0.48	0.47	0.492	0.48	Ndufb2	6	39592574	39603382	protein_coding	KNOWN
ENSMUSG00000002477	0.53	0.41	0.53	0.48	0.48	0.48	0.49	0.49	0.56	0.44	0.486	0.492	Snrpd1	18	10617796	10628230	protein_coding	KNOWN
ENSMUSG00000002486	0.44	0.45	0.45	0.5	0.48	0.4	0.49	0.5	0.39	0.45	0.464	0.446	Tchp	5	114707760	114722327	protein_coding	KNOWN
ENSMUSG00000002489	0.51	0.51	0.51	0.49	0.49	0.48	0.5	0.49	0.48	0.49	0.502	0.488	Tiam1	16	89787111	89980080	protein_coding	KNOWN
ENSMUSG00000002496	0.48	0.53	0.51	0.56	0.52	0.53	0.51	0.53	0.53	0.54	0.52	0.528	Tsc2	17	24595937	24632629	protein_coding	KNOWN
ENSMUSG00000002504	0.43	0.45	0.43	0.43	0.45	0.44	0.44	0.44	0.43	0.42	0.438	0.434	Slc9a3r2	17	24639282	24650305	protein_coding	KNOWN
ENSMUSG00000002550	0.52	0.57	0.47	0.48	0.49	0.52	0.54	0.49	0.56	0.52	0.506	0.526	Uck1	2	32255002	32260159	protein_coding	KNOWN
ENSMUSG00000002578	0.52	0.51	0.52	0.51	0.55	0.52	0.44	0.56	0.53	0.53	0.522	0.516	Ikzf4	10	128630843	128645991	protein_coding	KNOWN
ENSMUSG00000002580	0.51	0.49	0.48	0.51	0.51	0.5	0.55	0.48	0.52	0.49	0.5	0.508	1810046J19Rik	11	98437708	98438991	protein_coding	NOVEL
ENSMUSG00000002602	0.54	0.51	0.53	0.53	0.54	0.53	0.51	0.55	0.52	0.51	0.53	0.524	Axl	7	25757273	25788705	protein_coding	KNOWN
ENSMUSG00000002603	0.59	0.63	0.53	0.46	0.57	0.64	0.58	0.49	0.73	0.59	0.556	0.606	Tgfb1	7	25687002	25705077	protein_coding	KNOWN
ENSMUSG00000002608	0.59	0.63	0.61	0.58	0.61	0.58	0.58	0.57	0.58	0.59	0.604	0.58	Ccdc97	7	25711106	25719088	protein_coding	KNOWN
ENSMUSG00000002617	0.57	0.54	0.59	0.58	0.56	0.47	0.52	0.56	0.61	0.57	0.568	0.546	Zfp40	17	23173869	23193252	protein_coding	KNOWN
ENSMUSG00000002633	0.48	0.45	0.53	0.36	0.23	0.32	0.35	0.5	0.41	0.4	0.41	0.396	Shh	5	28456815	28467101	protein_coding	KNOWN
ENSMUSG00000002635	0.53	0.43	0.47	0.5	0.5	0.45	0.48	0.46	0.46	0.46	0.486	0.462	Pdcd2l	7	34184499	34196661	protein_coding	KNOWN
ENSMUSG00000002658	0.52	0.42	0.43	0.51	0.54	0.48	0.46	0.49	0.51	0.5	0.484	0.488	Gtf2f1	17	57003405	57011288	protein_coding	KNOWN
ENSMUSG00000002660	0.55	0.54	0.56	0.53	0.54	0.52	0.55	0.53	0.55	0.54	0.544	0.538	Clpp	17	56990264	56996371	protein_coding	KNOWN
ENSMUSG00000002688	0.45	0.46	0.4	0.52	0.53	0.52	0.51	0.47	0.44	0.41	0.472	0.47	Prkd1	12	50341231	50649223	protein_coding	KNOWN
ENSMUSG00000002718	0.52	0.5	0.49	0.51	0.53	0.51	0.51	0.51	0.49	0.5	0.51	0.504	Cse1l	2	166906040	166946389	protein_coding	KNOWN
ENSMUSG00000002728	0.51	0.54	0.46	0.56	0.39	0.52	0.57	0.52	0.49	0.45	0.492	0.51	Naa20	2	145902099	145916425	protein_coding	KNOWN
ENSMUSG00000002731	0.47	0.48	0.62	0.52	0.61	0.49	0.49	0.55	0.56	0.52	0.54	0.522	Prkra	2	76629898	76648015	protein_coding	KNOWN
ENSMUSG00000002732	0.32	0.52	0.29	0.37	0.5	0.31	0.41	0.36	0.41	0.5	0.4	0.398	Fkbp7	2	76663044	76673116	protein_coding	KNOWN
ENSMUSG00000002733	0.53	0.51	0.58	0.54	0.56	0.51	0.48	0.49	0.49	0.49	0.544	0.492	Plekha3	2	76675281	76696828	protein_coding	KNOWN
ENSMUSG00000002741	0.47	0.49	0.47	0.5	0.51	0.5	0.49	0.52	0.49	0.51	0.488	0.502	Ykt6	11	5955693	5967780	protein_coding	KNOWN
ENSMUSG00000002748	0.57	0.59	0.52	0.51	0.57	0.54	0.52	0.51	0.55	0.52	0.552	0.528	Baz1b	5	135187264	135246129	protein_coding	KNOWN
ENSMUSG00000002763	0.57	0.59	0.58	0.59	0.51	0.55	0.58	0.54	0.57	0.58	0.568	0.564	Pex6	17	46711463	46725541	protein_coding	KNOWN
ENSMUSG00000002768	0.55	0.5	0.58	0.58	0.49	0.44	0.55	0.55	0.51	0.51	0.54	0.512	Mea1	17	46681137	46683105	protein_coding	KNOWN
ENSMUSG00000002771	0.52	0.6	0.51	0.5	0.58	0.45	0.54	0.53	0.56	0.56	0.542	0.528	Grin2d	7	45831883	45870928	protein_coding	KNOWN
ENSMUSG00000002797	0.52	0.69	0.45	0.53	0.69	0.45	0.51	0.64	0.53	0.52	0.576	0.53	Ggct	6	54982580	54992950	protein_coding	KNOWN
ENSMUSG00000002799	0.45	0.5	0.48	0.52	0.42	0.48	0.55	0.53	0.53	0.52	0.474	0.522	Jag2	12	112908590	112929495	protein_coding	KNOWN
ENSMUSG00000002803	0.46	0.5	0.55	0.43	0.56	0.51	0.43	0.48	0.45	0.49	0.5	0.472	Btbd6	12	112976482	112978930	protein_coding	KNOWN
ENSMUSG00000002804	0.59	0.53	0.55	0.45	0.39	0.43	0.39	0.41	0.39	0.53	0.502	0.43	Nudt14	12	112934733	112942118	protein_coding	KNOWN
ENSMUSG00000002808	0.54	0.52	0.51	0.56	0.58	0.55	0.52	0.51	0.51	0.53	0.542	0.524	Epdr1	13	19591709	19619830	protein_coding	KNOWN
ENSMUSG00000002812	0.5	0.48	0.48	0.52	0.48	0.47	0.51	0.48	0.49	0.48	0.492	0.486	Flii	11	60714123	60727263	protein_coding	KNOWN
ENSMUSG00000002820	0.59	0.56	0.56	0.55	0.52	0.54	0.54	0.49	0.5	0.49	0.556	0.512	Atg4d	9	21265299	21274368	protein_coding	KNOWN
ENSMUSG00000002825	0.52	0.59	0.31	0.66	0.44	0.43	0.45	0.52	0.48	0.47	0.504	0.47	Qtrt1	9	21411837	21420277	protein_coding	KNOWN
ENSMUSG00000002831	0.56	0.5	0.6	0.6	0	0.56	0.64	0.57	0.71	0.59	0.452	0.614	Plin4	17	56100591	56109802	protein_coding	KNOWN
ENSMUSG00000002833	0.52	0.52	0.45	0.52	0.53	0.38	0.45	0.49	0.42	0.52	0.508	0.452	Hdgfrp2	17	56079657	56100596	protein_coding	KNOWN
ENSMUSG00000002835	0.53	0.37	0.69	0.43	0.57	0.66	0.63	0.59	0.59	0.53	0.518	0.6	Chaf1a	17	56040416	56068026	protein_coding	KNOWN
ENSMUSG00000002870	0.5	0.5	0.48	0.45	0.56	0.52	0.51	0.54	0.46	0.49	0.498	0.504	Mcm2	6	88883475	88898780	protein_coding	KNOWN
ENSMUSG00000002871	0.49	0.5	0.53	0.49	0.55	0.52	0.47	0.47	0.5	0.48	0.512	0.488	Tpra1	6	88902251	88912238	protein_coding	KNOWN
ENSMUSG00000002881	0.44	0.46	0.48	0.46	0.46	0.48	0.46	0.49	0.47	0.49	0.46	0.478	Nab1	1	52457294	52500679	protein_coding	KNOWN
ENSMUSG00000002885	0.61	0.47	0.6	0.5	0.56	0.56	0.57	0.62	0.56	0.56	0.548	0.574	Cd97	8	83723251	83741326	protein_coding	KNOWN
ENSMUSG00000002897	0.67	0.59	0.64	0.71	0.56	0.65	0.6	0.63	0.61	0.66	0.634	0.63	Il17ra	6	120463197	120483727	protein_coding	KNOWN
ENSMUSG00000002910	0.5	0.53	0.52	0.52	0.43	0.49	0.54	0.42	0.56	0.48	0.5	0.498	Arrdc2	8	70835155	70839720	protein_coding	KNOWN
ENSMUSG00000002930	0.64	0.63	0.72	0.6	0.81	0.6	0.66	0.57	0.62	0.72	0.68	0.634	Ppp1r17	6	56017515	56032688	protein_coding	KNOWN
ENSMUSG00000002948	0.52	0.5	0.51	0.52	0.47	0.49	0.48	0.49	0.51	0.49	0.504	0.492	Map2k7	8	4238740	4251423	protein_coding	KNOWN
ENSMUSG00000002949	0.52	0.48	0.56	0.54	0.47	0.47	0.52	0.49	0.46	0.5	0.514	0.488	Timm44	8	4259731	4275913	protein_coding	KNOWN
ENSMUSG00000002957	0.49	0.49	0.52	0.52	0.5	0.52	0.51	0.5	0.52	0.5	0.504	0.51	Ap2a2	7	141562180	141633011	protein_coding	KNOWN
ENSMUSG00000002963	0.61	0.47	0.53	0.64	0.45	0.57	0.6	0.55	0.65	0.56	0.54	0.586	Pnkp	7	44857139	44862925	protein_coding	KNOWN
ENSMUSG00000002968	0.54	0.49	0.54	0.52	0.51	0.51	0.53	0.51	0.49	0.54	0.52	0.516	Med25	7	44879391	44892397	protein_coding	KNOWN
ENSMUSG00000002980	0.52	0.58	0.54	0.57	0.49	0.51	0.58	0.57	0.6	0.49	0.54	0.55	Bcam	7	19756131	19771016	protein_coding	KNOWN
ENSMUSG00000002981	0.46	0.47	0.43	0.48	0.49	0.45	0.47	0.46	0.49	0.46	0.466	0.466	Clptm1	7	19631581	19665030	protein_coding	KNOWN
ENSMUSG00000002984	0.47	0.49	0.52	0.52	0.48	0.48	0.49	0.47	0.49	0.51	0.496	0.488	Tomm40	7	19701313	19715438	protein_coding	KNOWN
ENSMUSG00000002985	0.48	0.47	0.47	0.47	0.48	0.47	0.47	0.47	0.48	0.47	0.474	0.472	Apoe	7	19696109	19699166	protein_coding	KNOWN
ENSMUSG00000002996	0.52	0.54	0.59	0.57	0.5	0.51	0.45	0.53	0.55	0.54	0.544	0.516	Hbp1	12	31926254	31950535	protein_coding	KNOWN
ENSMUSG00000002997	0.54	0.53	0.53	0.47	0.47	0.51	0.51	0.51	0.55	0.51	0.508	0.518	Prkar2b	12	31958476	32061296	protein_coding	KNOWN
ENSMUSG00000003031	0.49	0.49	0.54	0.48	0.5	0.47	0.52	0.49	0.48	0.49	0.5	0.49	Cdkn1b	6	134920401	134925513	protein_coding	KNOWN
ENSMUSG00000003032	0.48	0.59	0.55	0.56	0.51	0.5	0.66	0.54	0.51	0.56	0.538	0.554	Klf4	4	55527143	55532466	protein_coding	KNOWN
ENSMUSG00000003033	0.34	0.37	0.35	0.35	0.42	0.42	0.35	0.38	0.4	0.34	0.366	0.378	Ap1m1	8	72240018	72257385	protein_coding	KNOWN
ENSMUSG00000003037	0.5	0.49	0.48	0.54	0.5	0.54	0.56	0.51	0.56	0.48	0.502	0.53	Rab8a	8	72161200	72183904	protein_coding	KNOWN
ENSMUSG00000003038	0.74	0.72	0.71	0.71	0.79	0.72	0.74	0.73	0.72	0.71	0.734	0.724	Hmgn2	4	133964738	133968650	protein_coding	KNOWN
ENSMUSG00000003039	0.47	0.5	0.44	0.35	0.47	0.48	0.43	0.43	0.51	0.45	0.446	0.46	Fam32a	8	72219730	72223764	protein_coding	KNOWN
ENSMUSG00000003062	0.47	0.55	0.52	0.45	0.52	0.52	0.5	0.52	0.55	0.5	0.502	0.518	Stard3nl	13	19357677	19395752	protein_coding	KNOWN
ENSMUSG00000003068	0.5	0.47	0.47	0.52	0.48	0.48	0.48	0.49	0.49	0.47	0.488	0.482	Stk11	10	80115803	80130682	protein_coding	KNOWN
ENSMUSG00000003070	0.59	0.57	0.59	0.51	0.34	0.4	0.51	0.53	0.49	0.53	0.52	0.492	Efna2	10	80179482	80190010	protein_coding	KNOWN
ENSMUSG00000003072	0.54	0.56	0.51	0.52	0.54	0.56	0.56	0.54	0.56	0.54	0.534	0.552	Atp5d	10	80138632	80145818	protein_coding	KNOWN
ENSMUSG00000003119	0.52	0.45	0.45	0.51	0.42	0.55	0.51	0.49	0.53	0.49	0.47	0.514	Cdk12	11	98203059	98278504	protein_coding	KNOWN
ENSMUSG00000003131	0.51	0.49	0.51	0.53	0.53	0.51	0.52	0.52	0.51	0.52	0.514	0.516	Pafah1b2	9	45965311	45984871	protein_coding	KNOWN
ENSMUSG00000003134	0.52	0.44	0.4	0.26	0.59	0.48	0.48	0.58	0.4	0.47	0.442	0.482	Tbc1d8	1	39371499	39478747	protein_coding	KNOWN
ENSMUSG00000003153	0.63	0.63	0.64	0.65	0.62	0.62	0.62	0.61	0.63	0.62	0.634	0.62	Slc2a3	6	122727809	122801640	protein_coding	KNOWN
ENSMUSG00000003154	0.46	0.49	0.5	0.47	0.52	0.45	0.47	0.49	0.47	0.45	0.488	0.466	Foxj2	6	122819914	122845366	protein_coding	KNOWN
ENSMUSG00000003161	0.48	0.48	0.45	0.5	0.46	0.47	0.46	0.46	0.46	0.47	0.474	0.464	Sri	5	8046078	8069379	protein_coding	KNOWN
ENSMUSG00000003166	0.5	0.5	0.5	0.5	0.48	0.49	0.49	0.5	0.5	0.5	0.496	0.496	Dgcr2	16	17839482	17894145	protein_coding	KNOWN
ENSMUSG00000003178	0.46	0.5	0.55	0.53	0.46	0.46	0.52	0.6	0.55	0.51	0.5	0.528	Mical3	6	121007241	121081609	protein_coding	KNOWN
ENSMUSG00000003184	0.6	0.62	0.7	0.62	0.56	0.6	0.61	0.59	0.58	0.64	0.62	0.604	Irf3	7	44997648	45002848	protein_coding	KNOWN
ENSMUSG00000003198	0.63	0.48	0.66	0.71	0.38	0.58	0.55	0.56	0.7	0.54	0.572	0.586	Zfp959	17	55892184	55898584	protein_coding	KNOWN
ENSMUSG00000003199	0.53	0.47	0.51	0.48	0.49	0.44	0.52	0.48	0.49	0.48	0.496	0.482	Mpnd	17	56005711	56016790	protein_coding	KNOWN
ENSMUSG00000003200	0.49	0.49	0.54	0.49	0.5	0.46	0.48	0.5	0.48	0.5	0.502	0.484	Sh3gl1	17	56016753	56036637	protein_coding	KNOWN
ENSMUSG00000003208	0.34	0.28	0.31	0.38	0.43	0.27	0.3	0.5	0.32	0.38	0.348	0.354	Ccdc94	17	55959187	55967949	protein_coding	KNOWN
ENSMUSG00000003226	0.44	0.46	0.49	0.48	0.47	0.48	0.48	0.48	0.5	0.48	0.468	0.484	Ranbp2	10	58446852	58494155	protein_coding	KNOWN
ENSMUSG00000003227	0.17	0.71	0.55	0.5	0.5	0.6	0.8	0.25	0.5	0.41	0.486	0.512	Edar	10	58600789	58675654	protein_coding	KNOWN
ENSMUSG00000003228	0.46	0.47	0.61	0.49	0.48	0.42	0.56	0.5	0.49	0.4	0.502	0.474	Grk5	19	60889749	61092553	protein_coding	KNOWN
ENSMUSG00000003233	0.51	0.49	0.45	0.42	0.57	0.48	0.51	0.49	0.54	0.52	0.488	0.508	Dvl3	16	20516982	20532520	protein_coding	KNOWN
ENSMUSG00000003234	0.54	0.52	0.46	0.43	0.51	0.5	0.5	0.47	0.46	0.46	0.492	0.478	Abcf3	16	20548577	20561379	protein_coding	KNOWN
ENSMUSG00000003269	0.5	0.48	0.53	0.49	0.5	0.53	0.51	0.52	0.52	0.5	0.5	0.516	Cyth2	7	45806637	45814581	protein_coding	KNOWN
ENSMUSG00000003271	0.77	0.67	0.61	0.72	1	0.73	0.86	0.75	0.85	0.91	0.754	0.82	Sult2b1	7	45729983	45759612	protein_coding	KNOWN
ENSMUSG00000003273	0.51	0.53	0.55	0.49	0.45	0.55	0.51	0.5	0.48	0.53	0.506	0.514	Car11	7	45699843	45704682	protein_coding	KNOWN
ENSMUSG00000003279	0.51	0.51	0.52	0.56	0.52	0.51	0.51	0.5	0.5	0.5	0.524	0.504	Dlgap1	17	69969073	70821413	protein_coding	KNOWN
ENSMUSG00000003282	0.38	0.42	0.35	0.43	0.4	0.57	0.41	0.44	0.41	0.4	0.396	0.446	Plag1	4	3900996	3938423	protein_coding	KNOWN
ENSMUSG00000003299	0.55	0.57	0.53	0.51	0.54	0.56	0.55	0.53	0.57	0.55	0.54	0.552	Mrpl4	9	21002737	21008835	protein_coding	KNOWN
ENSMUSG00000003344	0.48	0.5	0.5	0.49	0.51	0.47	0.49	0.52	0.48	0.49	0.496	0.49	Btbd2	10	80642617	80657071	protein_coding	KNOWN
ENSMUSG00000003345	0.52	0.48	0.5	0.49	0.5	0.46	0.47	0.48	0.5	0.5	0.498	0.482	Csnk1g2	10	80622780	80640771	protein_coding	KNOWN
ENSMUSG00000003346	0.44	0.49	0.53	0.47	0.48	0.47	0.5	0.48	0.49	0.47	0.482	0.482	Fam108a	10	80583649	80590341	protein_coding	KNOWN
ENSMUSG00000003348	0.38	0.44	0.49	0.45	0.44	0.5	0.43	0.46	0.47	0.47	0.44	0.466	Mob3a	10	80685256	80701820	protein_coding	KNOWN
ENSMUSG00000003354	0.55	0.53	0.54	0.55	0.61	0.5	0.51	0.46	0.44	0.54	0.556	0.49	Ccdc65	15	98708207	98723326	protein_coding	KNOWN
ENSMUSG00000003355	0.36	0.25	0.43	0.44	0.46	0.75	0.25	0.53	0.25	0.5	0.388	0.456	Fkbp11	15	98724373	98728198	protein_coding	KNOWN
ENSMUSG00000003360	0.51	0.51	0.54	0.54	0.51	0.49	0.46	0.5	0.5	0.5	0.522	0.49	Ddx23	15	98645134	98662889	protein_coding	KNOWN
ENSMUSG00000003363	0.47	0.49	0.49	0.46	0.45	0.46	0.48	0.48	0.46	0.48	0.472	0.472	Pld3	7	27532000	27553218	protein_coding	KNOWN
ENSMUSG00000003378	0.53	0.54	0.52	0.54	0.51	0.52	0.52	0.52	0.51	0.51	0.528	0.516	Grik5	7	25009853	25072369	protein_coding	KNOWN
ENSMUSG00000003380	0.43	0.48	0.51	0.53	0.5	0.53	0.54	0.47	0.51	0.46	0.49	0.502	Rabac1	7	24969750	24972728	protein_coding	KNOWN
ENSMUSG00000003410	0.51	0.52	0.51	0.5	0.5	0.52	0.5	0.51	0.51	0.52	0.508	0.512	Elavl3	9	22015005	22052023	protein_coding	KNOWN
ENSMUSG00000003411	0.48	0.49	0.48	0.49	0.47	0.48	0.48	0.5	0.48	0.48	0.482	0.484	Rab3b	4	108879063	108943324	protein_coding	KNOWN
ENSMUSG00000003418	0.48	0.51	0.62	0.4	0.37	0.41	0.49	0.48	0.47	0.45	0.476	0.46	St8sia6	2	13651020	13793808	protein_coding	KNOWN
ENSMUSG00000003420	0.46	0.52	0.46	0.43	0.53	0.49	0.53	0.5	0.47	0.5	0.48	0.498	Fcgrt	7	45092993	45103822	protein_coding	KNOWN
ENSMUSG00000003421	0.53	0.6	0.51	0.56	0.55	0.53	0.54	0.58	0.57	0.55	0.55	0.554	Nosip	7	45062429	45078503	protein_coding	KNOWN
ENSMUSG00000003423	0.47	0.41	0.42	0.57	0.54	0.46	0.48	0.47	0.47	0.52	0.482	0.48	Pih1d1	7	45154303	45160069	protein_coding	KNOWN
ENSMUSG00000003429	0.49	0.48	0.48	0.48	0.48	0.48	0.49	0.47	0.48	0.48	0.482	0.48	Rps11	7	45122388	45124389	protein_coding	KNOWN
ENSMUSG00000003435	0.49	0.49	0.55	0.56	0.57	0.5	0.51	0.52	0.51	0.52	0.532	0.512	Supt5h	7	28314898	28338719	protein_coding	KNOWN
ENSMUSG00000003436	0.26	0.28	0.31	0.22	0.46	0.3	0.37	0.29	0.33	0.54	0.306	0.366	Dll3	7	28293553	28302238	protein_coding	KNOWN
ENSMUSG00000003437	0.5	0.46	0.53	0.53	0.49	0.55	0.54	0.59	0.52	0.53	0.502	0.546	Paf1	7	28392951	28399388	protein_coding	KNOWN
ENSMUSG00000003438	0.53	0.52	0.54	0.5	0.51	0.49	0.48	0.47	0.45	0.5	0.52	0.478	Timm50	7	28305516	28312072	protein_coding	KNOWN
ENSMUSG00000003444	0.53	0.56	0.5	0.49	0.48	0.55	0.55	0.51	0.58	0.53	0.512	0.544	Med29	7	28386146	28392708	protein_coding	KNOWN
ENSMUSG00000003452	0.49	0.48	0.53	0.47	0.52	0.48	0.48	0.47	0.52	0.53	0.498	0.496	Bicd1	6	149408984	149563329	protein_coding	KNOWN
ENSMUSG00000003464	0.61	0.66	0.6	0.6	0.6	0.61	0.62	0.62	0.62	0.64	0.614	0.622	Pex19	1	172126755	172136493	protein_coding	KNOWN
ENSMUSG00000003469	0.51	0.55	0.56	0.6	0.53	0.55	0.56	0.55	0.56	0.55	0.55	0.554	Phyhip	14	70457476	70468832	protein_coding	KNOWN
ENSMUSG00000003476	0.59	0.37	0.19	0.5	0.7	0.57	0.78	0.67	0.45	0.67	0.47	0.628	Crhr2	6	55090049	55133016	protein_coding	KNOWN
ENSMUSG00000003477	0.26	0.28	0.34	0.16	0.48	0.24	0.2	0.16	0.23	0.19	0.304	0.204	Inmt	6	55170626	55175043	protein_coding	KNOWN
ENSMUSG00000003500	0.5	0.54	0.56	0.53	0.52	0.5	0.54	0.5	0.5	0.53	0.53	0.514	Impdh1	6	29200434	29216364	protein_coding	KNOWN
ENSMUSG00000003518	0.46	0.48	0.48	0.46	0.47	0.48	0.48	0.47	0.47	0.48	0.47	0.476	Dusp3	11	101971143	101987013	protein_coding	KNOWN
ENSMUSG00000003527	0.5	0.44	0.49	0.52	0.52	0.46	0.49	0.51	0.45	0.5	0.494	0.482	Dgcr14	16	17900711	17911348	protein_coding	KNOWN
ENSMUSG00000003528	0.48	0.57	0.57	0.5	0.46	0.53	0.51	0.48	0.52	0.54	0.516	0.516	Slc25a1	16	17925211	17928219	protein_coding	KNOWN
ENSMUSG00000003545	0.44	0.51	0.43	0.42	0.44	0.48	0.38	0.46	0.49	0.48	0.448	0.458	Fosb	7	19302721	19310045	protein_coding	KNOWN
ENSMUSG00000003546	0.49	0.46	0.53	0.48	0.51	0.48	0.52	0.49	0.52	0.46	0.494	0.494	Klc4	17	46630631	46645144	protein_coding	KNOWN
ENSMUSG00000003549	0.49	0.45	0.6	0.46	0.52	0.42	0.47	0.62	0.46	0.57	0.504	0.508	Ercc1	7	19344778	19356524	protein_coding	KNOWN
ENSMUSG00000003559	0.24	0.29	0.27	0.28	0.24	0.25	0.26	0.26	0.24	0.27	0.264	0.256	As3mt	19	46707443	46741095	protein_coding	KNOWN
ENSMUSG00000003575	0.49	0.48	0.49	0.49	0.45	0.49	0.47	0.47	0.48	0.49	0.48	0.48	Crtc1	8	70382355	70439579	protein_coding	KNOWN
ENSMUSG00000003581	0.53	0.49	0.52	0.54	0.54	0.48	0.46	0.46	0.51	0.53	0.524	0.488	Rnf215	11	4135202	4141172	protein_coding	KNOWN
ENSMUSG00000003585	0.54	0.51	0.5	0.46	0.48	0.52	0.52	0.5	0.51	0.56	0.498	0.522	Sec14l2	11	4097039	4123415	protein_coding	KNOWN
ENSMUSG00000003604	0.74	0.5	0.59	0.49	0.81	0.74	0.63	0.56	0.57	0.47	0.626	0.594	Aven	2	112492964	112634573	protein_coding	KNOWN
ENSMUSG00000003617	0.69	0.62	0.61	0.6	0.65	0.59	0.67	0.66	0.63	0.59	0.634	0.628	Cp	3	19957054	20009145	protein_coding	KNOWN
ENSMUSG00000003623	0.55	0.55	0.58	0.57	0.53	0.53	0.58	0.53	0.55	0.53	0.556	0.544	Crot	5	8966033	8997324	protein_coding	KNOWN
ENSMUSG00000003657	0.5	0.51	0.49	0.51	0.5	0.51	0.5	0.51	0.52	0.51	0.502	0.51	Calb2	8	110142539	110168206	protein_coding	KNOWN
ENSMUSG00000003660	0.48	0.49	0.46	0.53	0.58	0.5	0.5	0.48	0.49	0.48	0.508	0.49	Snrnp200	2	127208386	127240451	protein_coding	KNOWN
ENSMUSG00000003662	0.46	0.45	0.58	0.54	0.53	0.48	0.53	0.52	0.48	0.49	0.512	0.5	Ciao1	2	127240938	127247816	protein_coding	KNOWN
ENSMUSG00000003680	0.37	0.53	0.4	0.43	0.61	0.5	0.51	0.55	0.49	0.44	0.468	0.498	Taf6l	19	8774354	8786417	protein_coding	KNOWN
ENSMUSG00000003721	0.54	0.52	0.49	0.53	0.52	0.54	0.54	0.52	0.54	0.53	0.52	0.534	Insig2	1	121304353	121332589	protein_coding	KNOWN
ENSMUSG00000003731	0.5	0.54	0.49	0.5	0.51	0.49	0.52	0.51	0.52	0.49	0.508	0.506	Kpna6	4	129643980	129672767	protein_coding	KNOWN
ENSMUSG00000003746	0.42	0.44	0.47	0.47	0.45	0.45	0.45	0.45	0.46	0.46	0.45	0.454	Man1a	10	53904788	54075796	protein_coding	KNOWN
ENSMUSG00000003752	0.37	0.43	0.52	0.44	0.45	0.42	0.44	0.51	0.42	0.42	0.442	0.442	Itpkc	7	27207172	27228628	protein_coding	KNOWN
ENSMUSG00000003778	0.47	0.5	0.51	0.57	0.53	0.49	0.46	0.53	0.52	0.51	0.516	0.502	Brd8	18	34598615	34624601	protein_coding	KNOWN
ENSMUSG00000003808	0.48	0.51	0.53	0.38	0.44	0.47	0.43	0.48	0.45	0.52	0.468	0.47	Farsa	8	84856989	84869257	protein_coding	KNOWN
ENSMUSG00000003809	0.56	0.53	0.56	0.47	0.57	0.56	0.53	0.52	0.53	0.55	0.538	0.538	Gcdh	8	84886393	84893921	protein_coding	KNOWN
ENSMUSG00000003810	0.54	0.53	0.54	0.55	0.6	0.56	0.58	0.54	0.54	0.51	0.552	0.546	Mast2	4	116306762	116464183	protein_coding	KNOWN
ENSMUSG00000003814	0.5	0.52	0.5	0.5	0.54	0.52	0.52	0.52	0.53	0.53	0.512	0.524	Calr	8	84841850	84846934	protein_coding	KNOWN
ENSMUSG00000003824	0.26	0.07	0.16	0.12	0.49	0.21	0.38	0.29	0.5	0.25	0.22	0.326	Syce2	8	84872111	84888221	protein_coding	KNOWN
ENSMUSG00000003847	0.49	0.51	0.48	0.5	0.49	0.47	0.48	0.51	0.5	0.49	0.494	0.49	Nfat5	8	107293470	107379517	protein_coding	KNOWN
ENSMUSG00000003848	0.48	0.42	0.47	0.49	0.46	0.51	0.48	0.45	0.47	0.46	0.464	0.474	Nob1	8	107412486	107425051	protein_coding	KNOWN
ENSMUSG00000003849	0.57	0.5	0.66	0.47	0.79	0.58	0.51	0.51	0.54	0.56	0.598	0.54	Nqo1	8	107388225	107403206	protein_coding	KNOWN
ENSMUSG00000003865	0.62	0.54	0.47	0.56	0.58	0.59	0.55	0.62	0.54	0.56	0.554	0.572	Gys1	7	45434844	45456619	protein_coding	KNOWN
ENSMUSG00000003868	0.56	0.52	0.56	0.52	0.5	0.52	0.59	0.46	0.53	0.52	0.532	0.524	Ruvbl2	7	45421852	45438096	protein_coding	KNOWN
ENSMUSG00000003872	0.51	0.45	0.77	0.6	0.46	0.43	0.33	0.53	0.62	0.62	0.558	0.506	Lin7b	7	45367891	45370583	protein_coding	KNOWN
ENSMUSG00000003873	0.43	0.38	0.43	0.46	0.53	0.43	0.43	0.45	0.49	0.47	0.446	0.454	Bax	7	45461695	45466898	protein_coding	KNOWN
ENSMUSG00000003923	0.51	0.46	0.6	0.49	0.51	0.5	0.5	0.47	0.53	0.54	0.514	0.508	Tfam	10	71225464	71238280	protein_coding	KNOWN
ENSMUSG00000003929	0.48	0.52	0.46	0.51	0.48	0.5	0.51	0.52	0.53	0.52	0.49	0.516	Zfp81	17	33329342	33358878	protein_coding	KNOWN
ENSMUSG00000003934	0.51	0.51	0.51	0.51	0.5	0.47	0.49	0.49	0.49	0.51	0.508	0.49	Efnb3	11	69554092	69560205	protein_coding	KNOWN
ENSMUSG00000003948	0.48	0.47	0.48	0.47	0.48	0.45	0.46	0.47	0.47	0.46	0.476	0.462	Mmd	11	90187684	90278589	protein_coding	KNOWN
ENSMUSG00000003949	0.5	0.52	0.48	0.51	0.48	0.49	0.5	0.5	0.5	0.49	0.498	0.496	Hlf	11	90336536	90390895	protein_coding	KNOWN
ENSMUSG00000003955	0.57	0.55	0.48	0.52	0.56	0.55	0.53	0.51	0.49	0.54	0.536	0.524	Fam162a	16	36043844	36071515	protein_coding	KNOWN
ENSMUSG00000003970	0.49	0.47	0.47	0.47	0.45	0.47	0.49	0.45	0.49	0.48	0.47	0.476	Rpl8	15	76904071	76906318	protein_coding	KNOWN
ENSMUSG00000003974	0.55	0.46	0.52	0.55	0.54	0.55	0.56	0.58	0.57	0.57	0.524	0.566	Grm3	5	9485236	9725352	protein_coding	KNOWN
ENSMUSG00000003992	0.42	0.47	0.48	0.49	0.47	0.48	0.43	0.48	0.46	0.43	0.466	0.456	Ssbp2	13	91460283	91703429	protein_coding	KNOWN
ENSMUSG00000004018	0.62	0.76	0.61	0.6	0.43	0.61	0.53	0.57	0.51	0.55	0.604	0.554	Fancl	11	26386135	26471876	protein_coding	KNOWN
ENSMUSG00000004031	0.47	0.45	0.47	0.46	0.46	0.47	0.47	0.45	0.46	0.46	0.462	0.462	Fam5b	1	158245271	158356260	protein_coding	KNOWN
ENSMUSG00000004035	0.11	0.16	0.1	0.18	0.11	0.23	0.17	0.11	0.3	0.14	0.132	0.19	Gstm7	3	107926334	107931817	protein_coding	KNOWN
ENSMUSG00000004040	0.49	0.49	0.5	0.5	0.49	0.51	0.5	0.51	0.48	0.5	0.494	0.5	Stat3	11	100885098	100939540	protein_coding	KNOWN
ENSMUSG00000004044	0.56	0.55	0.55	0.55	0.54	0.59	0.55	0.55	0.55	0.54	0.55	0.556	Ptrf	11	100956733	100970887	protein_coding	KNOWN
ENSMUSG00000004054	0.58	0.64	0.51	0.49	0.58	0.5	0.51	0.56	0.45	0.54	0.56	0.512	Map3k11	19	5689131	5702862	protein_coding	KNOWN
ENSMUSG00000004056	0.53	0.52	0.51	0.52	0.51	0.52	0.49	0.5	0.5	0.5	0.518	0.502	Akt2	7	27591552	27640826	protein_coding	KNOWN
ENSMUSG00000004071	0.49	0.49	0.53	0.54	0.54	0.47	0.5	0.5	0.51	0.48	0.518	0.492	5730403B10Rik	16	4750348	4790292	protein_coding	KNOWN
ENSMUSG00000004085	0.51	0.56	0.63	0.59	0.52	0.54	0.53	0.52	0.54	0.58	0.562	0.542	B230120H23Rik	2	72285637	72442610	protein_coding	KNOWN
ENSMUSG00000004096	0.57	0.54	0.56	0.53	0.57	0.56	0.54	0.52	0.55	0.53	0.554	0.54	Cwc15	9	14500617	14510577	protein_coding	KNOWN
ENSMUSG00000004098	0.59	0.67	0.27	0.35	0.43	0.42	0.6	0.51	0.48	0.53	0.462	0.508	Col5a3	9	20770050	20815067	protein_coding	KNOWN
ENSMUSG00000004099	0.49	0.49	0.51	0.52	0.49	0.47	0.5	0.49	0.49	0.47	0.5	0.484	Dnmt1	9	20907206	20959888	protein_coding	KNOWN
ENSMUSG00000004100	0.48	0.48	0.43	0.48	0.47	0.54	0.5	0.45	0.47	0.48	0.468	0.488	Ppan	9	20888175	20892178	protein_coding	KNOWN
ENSMUSG00000004105	0.57	0.63	0.73	0.6	0.53	0.52	0.43	0.66	0.52	0.7	0.612	0.566	Angptl2	2	33216069	33247717	protein_coding	KNOWN
ENSMUSG00000004110	0.4	0.45	0.43	0.39	0.44	0.44	0.47	0.48	0.42	0.44	0.422	0.45	Cacna1e	1	154392519	154725920	protein_coding	KNOWN
ENSMUSG00000004127	0.54	0.65	0.62	0.61	0.59	0.71	0.74	0.67	0.68	0.64	0.602	0.688	Rg9mtd2	3	138143448	138159821	protein_coding	KNOWN
ENSMUSG00000004151	0.46	0.47	0.42	0.46	0.44	0.45	0.44	0.46	0.45	0.45	0.45	0.45	Etv1	12	38779380	38868215	protein_coding	KNOWN
ENSMUSG00000004187	0.52	0.5	0.51	0.51	0.51	0.5	0.5	0.49	0.51	0.48	0.51	0.496	Kifc2	15	76660641	76668196	protein_coding	KNOWN
ENSMUSG00000004207	0.5	0.49	0.49	0.5	0.47	0.49	0.5	0.49	0.49	0.49	0.49	0.492	Psap	10	60277627	60302597	protein_coding	KNOWN
ENSMUSG00000004221	0.16	0.21	0.24	0.34	0.25	0.39	0.36	0.51	0.25	0.26	0.24	0.354	Ikbkg	X	74393290	74453854	protein_coding	KNOWN
ENSMUSG00000004233	0.43	0.48	0.54	0.51	0.43	0.53	0.48	0.52	0.49	0.51	0.478	0.506	Wars2	3	99141068	99239186	protein_coding	KNOWN
ENSMUSG00000004263	0.51	0.51	0.55	0.53	0.51	0.5	0.52	0.54	0.45	0.51	0.522	0.504	Atn1	6	124739189	124756524	protein_coding	KNOWN
ENSMUSG00000004264	0.49	0.51	0.5	0.51	0.53	0.52	0.48	0.51	0.5	0.49	0.508	0.5	Phb2	6	124712336	124716950	protein_coding	KNOWN
ENSMUSG00000004267	0.5	0.49	0.5	0.49	0.52	0.49	0.49	0.49	0.5	0.5	0.5	0.494	Eno2	6	124760053	124769673	protein_coding	KNOWN
ENSMUSG00000004285	0.48	0.5	0.5	0.52	0.46	0.53	0.49	0.49	0.48	0.46	0.492	0.49	Atp6v1f	6	29467718	29470512	protein_coding	KNOWN
ENSMUSG00000004317	0.18	0.19	0.31	0.32	0.26	0.44	0.4	0.61	0.29	0.3	0.252	0.408	Clcn5	X	7153810	7319358	protein_coding	KNOWN
ENSMUSG00000004319	0.48	0.48	0.51	0.46	0.49	0.48	0.49	0.5	0.49	0.5	0.484	0.492	Clcn3	8	60910389	60983300	protein_coding	KNOWN
ENSMUSG00000004328	0.45	0.49	0.53	0.41	0.51	0.48	0.52	0.42	0.45	0.42	0.478	0.458	Hif3a	7	17031507	17062427	protein_coding	KNOWN
ENSMUSG00000004341	0.52	0.62	0.5	0.22	0.44	0.33	0.39	0.41	0.47	0.36	0.46	0.392	Gpx6	13	21312217	21319624	protein_coding	KNOWN
ENSMUSG00000004347	0.48	0.5	0.49	0.46	0.46	0.48	0.49	0.49	0.49	0.51	0.478	0.492	Pde1c	6	56069821	56369634	protein_coding	KNOWN
ENSMUSG00000004356	0.5	0.49	0.49	0.49	0.47	0.52	0.49	0.52	0.47	0.53	0.488	0.506	Utp20	10	88746607	88826814	protein_coding	KNOWN
ENSMUSG00000004360	0.42	0.42	0.44	0.45	0.44	0.42	0.42	0.43	0.43	0.45	0.434	0.43	9330159F19Rik	10	29211643	29230779	protein_coding	KNOWN
ENSMUSG00000004364	0.49	0.53	0.49	0.5	0.52	0.53	0.57	0.48	0.51	0.54	0.506	0.526	Cul3	1	80264923	80340480	protein_coding	KNOWN
ENSMUSG00000004366	0.42	0.42	0.45	0.46	0.48	0.41	0.63	0.43	0.49	0.49	0.446	0.49	Sst	16	23889581	23890844	protein_coding	KNOWN
ENSMUSG00000004383	0.47	0.51	0.5	0.48	0.5	0.49	0.5	0.49	0.51	0.48	0.492	0.494	Large	8	72814599	73353540	protein_coding	KNOWN
ENSMUSG00000004393	0.48	0.49	0.39	0.47	0.51	0.49	0.49	0.45	0.44	0.48	0.468	0.47	Ddx56	11	6258919	6267772	protein_coding	KNOWN
ENSMUSG00000004394	0.48	0.45	0.49	0.48	0.5	0.47	0.48	0.5	0.5	0.48	0.48	0.486	Tmed4	11	6270369	6274870	protein_coding	KNOWN
ENSMUSG00000004446	0.37	0.4	0.42	0.4	0.42	0.41	0.41	0.38	0.4	0.37	0.402	0.394	Bid	6	120891930	120916853	protein_coding	KNOWN
ENSMUSG00000004451	0.43	0.45	0.4	0.37	0.4	0.37	0.41	0.41	0.42	0.43	0.41	0.408	Ralb	1	119470305	119504794	protein_coding	KNOWN
ENSMUSG00000004455	0.5	0.5	0.5	0.5	0.5	0.5	0.5	0.5	0.5	0.5	0.5	0.5	Ppp1cc	5	122158278	122175273	protein_coding	KNOWN
ENSMUSG00000004460	0.49	0.46	0.49	0.5	0.52	0.5	0.5	0.5	0.52	0.5	0.492	0.504	Dnajb11	16	22857845	22879634	protein_coding	KNOWN
ENSMUSG00000004462	0.6	0.63	0.53	0.65	0.67	0.62	0.61	0.65	0.61	0.61	0.616	0.62	Tbccd1	16	22813215	22857569	protein_coding	KNOWN
ENSMUSG00000004473	0.46	0.78	0.57	0.42	0.61	0.57	0.55	0.41	0.67	0.45	0.568	0.53	Clec11a	7	44303770	44306959	protein_coding	KNOWN
ENSMUSG00000004508	0.53	0.56	0.54	0.52	0.64	0.5	0.54	0.54	0.5	0.52	0.558	0.52	Gab2	7	97081751	97308940	protein_coding	KNOWN
ENSMUSG00000004535	0.5	0.51	0.49	0.48	0.5	0.5	0.49	0.5	0.49	0.49	0.496	0.494	Tax1bp1	6	52713729	52766780	protein_coding	KNOWN
ENSMUSG00000004561	0.5	0.51	0.61	0.41	0.46	0.44	0.5	0.47	0.46	0.49	0.498	0.472	Mettl17	14	51884842	51893039	protein_coding	KNOWN
ENSMUSG00000004567	0.53	0.44	0.54	0.48	0.49	0.5	0.54	0.49	0.45	0.54	0.496	0.504	Mcoln1	8	3500457	3515232	protein_coding	KNOWN
ENSMUSG00000004568	0.5	0.5	0.49	0.52	0.47	0.5	0.5	0.5	0.47	0.51	0.496	0.496	Arhgef18	8	3393006	3456601	protein_coding	KNOWN
ENSMUSG00000004591	0.46	0.48	0.46	0.51	0.47	0.48	0.45	0.47	0.45	0.47	0.476	0.464	Pkn2	3	142790902	142882004	protein_coding	KNOWN
ENSMUSG00000004610	0.47	0.47	0.64	0.58	0.54	0.52	0.47	0.51	0.64	0.48	0.54	0.524	Etfb	7	43444108	43457800	protein_coding	KNOWN
ENSMUSG00000004626	0.67	0.65	0.61	0.61	0.53	0.7	0.7	0.67	0.72	0.64	0.614	0.686	Stxbp2	8	3630955	3643644	protein_coding	KNOWN
ENSMUSG00000004633	0.48	0.52	0.48	0.5	0.5	0.49	0.51	0.51	0.5	0.5	0.496	0.502	Chn2	6	54039554	54301810	protein_coding	KNOWN
ENSMUSG00000004637	0.56	0.52	0.47	0.52	0.52	0.53	0.56	0.51	0.58	0.56	0.518	0.548	Wwox	8	114439655	115352708	protein_coding	KNOWN
ENSMUSG00000004642	0.45	0.49	0.47	0.49	0.5	0.53	0.48	0.48	0.49	0.51	0.48	0.498	Slbp	5	33634952	33652574	protein_coding	KNOWN
ENSMUSG00000004655	0.44	0.44	0.45	0.48	0.46	0.48	0.48	0.49	0.5	0.52	0.454	0.494	Aqp1	6	55336432	55348555	protein_coding	KNOWN
ENSMUSG00000004665	0.68	0.34	0.46	0.48	0.53	0.53	0.6	0.47	0.65	0.53	0.498	0.556	Cnn2	10	79988584	79996062	protein_coding	KNOWN
ENSMUSG00000004667	0.5	0.48	0.43	0.45	0.51	0.51	0.44	0.52	0.47	0.51	0.474	0.49	Polr2e	10	80035949	80039795	protein_coding	KNOWN
ENSMUSG00000004668	0.58	0.33	0.51	0.4	0.5	0.75	0.46	0.53	0.53	0.75	0.464	0.604	Abca13	11	9191942	9684259	protein_coding	KNOWN
ENSMUSG00000004677	0.53	0.47	0.46	0.56	0.43	0.45	0.43	0.49	0.48	0.47	0.49	0.464	Myo9b	8	71272714	71360712	protein_coding	KNOWN
ENSMUSG00000004698	0.51	0.48	0.44	0.49	0.48	0.51	0.49	0.51	0.52	0.49	0.48	0.504	Hdac9	12	34371503	34528889	protein_coding	KNOWN
ENSMUSG00000004748	0.52	0.52	0.53	0.53	0.55	0.51	0.5	0.51	0.51	0.51	0.53	0.508	Mtfp1	11	4091480	4095445	protein_coding	KNOWN
ENSMUSG00000004768	0.5	0.5	0.48	0.48	0.53	0.49	0.51	0.51	0.52	0.52	0.498	0.51	Rab23	1	33719882	33742564	protein_coding	KNOWN
ENSMUSG00000004771	0.52	0.52	0.55	0.46	0.53	0.5	0.49	0.49	0.53	0.48	0.516	0.498	Rab11a	9	64715299	64737758	protein_coding	KNOWN
ENSMUSG00000004789	0.52	0.53	0.5	0.51	0.51	0.53	0.52	0.51	0.49	0.51	0.514	0.512	Dlst	12	85110833	85134091	protein_coding	KNOWN
ENSMUSG00000004791	0.53	0.52	0.7	0.6	0.6	0.52	0.41	0.52	0.51	0.58	0.59	0.508	Pgf	12	85166639	85177296	protein_coding	KNOWN
ENSMUSG00000004798	0.46	0.5	0.51	0.51	0.51	0.47	0.44	0.51	0.5	0.46	0.498	0.476	Ulk2	11	61775649	61855073	protein_coding	KNOWN
ENSMUSG00000004815	0.54	0.61	0.64	0.55	0.54	0.62	0.54	0.54	0.6	0.54	0.576	0.568	Dgkq	5	108646693	108669672	protein_coding	KNOWN
ENSMUSG00000004837	0.52	0.43	0.61	0.65	0.43	0.49	0.53	0.35	0.49	0.58	0.528	0.488	Grap	11	61653265	61672784	protein_coding	KNOWN
ENSMUSG00000004843	0.5	0.48	0.55	0.51	0.5	0.5	0.49	0.48	0.53	0.5	0.508	0.5	Chmp2b	16	65539133	65562697	protein_coding	KNOWN
ENSMUSG00000004846	0.45	0.53	0.46	0.49	0.44	0.47	0.51	0.47	0.48	0.52	0.474	0.49	Plod3	5	136987019	136996648	protein_coding	KNOWN
ENSMUSG00000004849	0.52	0.5	0.55	0.53	0.53	0.51	0.51	0.51	0.48	0.49	0.526	0.5	Ap1s1	5	137034993	137046135	protein_coding	KNOWN
ENSMUSG00000004865	0.44	0.44	0.43	0.47	0.41	0.45	0.47	0.45	0.43	0.45	0.438	0.45	Srpk1	17	28587648	28622521	protein_coding	KNOWN
ENSMUSG00000004880	0.5	0.49	0.43	0.47	0.42	0.53	0.44	0.47	0.46	0.46	0.462	0.472	Lbr	1	181815316	181842401	protein_coding	KNOWN
ENSMUSG00000004885	0.56	0.68	0.71	0.5	0.5	0.57	0.53	0.71	0.53	0.45	0.59	0.558	Crabp2	3	87948666	87953376	protein_coding	KNOWN
ENSMUSG00000004891	0.59	0.63	0.56	0.65	0.56	0.62	0.66	0.62	0.6	0.64	0.598	0.628	Nes	3	87971078	87980451	protein_coding	KNOWN
ENSMUSG00000004892	0.53	0.51	0.5	0.52	0.52	0.52	0.51	0.5	0.52	0.52	0.516	0.514	Bcan	3	87987531	88000356	protein_coding	KNOWN
ENSMUSG00000004894	0.38	0.42	0.43	0.39	0.48	0.41	0.53	0.46	0.45	0.42	0.42	0.454	Hapln2	3	88021750	88027583	protein_coding	KNOWN
ENSMUSG00000004895	0.78	0.84	0.76	0.76	0.72	0.74	0.74	0.76	0.81	0.77	0.772	0.764	Prcc	3	87858900	87885608	protein_coding	KNOWN
ENSMUSG00000004896	0.55	0.58	0.57	0.57	0.46	0.43	0.64	0.57	0.55	0.48	0.546	0.534	Rrnad1	3	87922601	87930717	protein_coding	KNOWN
ENSMUSG00000004897	0.53	0.52	0.49	0.51	0.52	0.52	0.52	0.54	0.56	0.53	0.514	0.534	Hdgf	3	87906321	87916132	protein_coding	KNOWN
ENSMUSG00000004902	0.51	0.5	0.51	0.48	0.49	0.53	0.52	0.5	0.52	0.5	0.498	0.514	Slc25a18	6	120773768	120793982	protein_coding	KNOWN
ENSMUSG00000004929	0.5	0.5	0.5	0.52	0.47	0.49	0.46	0.47	0.49	0.52	0.498	0.486	Thop1	10	81070035	81082559	protein_coding	KNOWN
ENSMUSG00000004931	0.57	0.46	0.55	0.53	0.5	0.57	0.51	0.51	0.55	0.51	0.522	0.53	Apba3	10	81268172	81273246	protein_coding	KNOWN
ENSMUSG00000004933	0.49	0.52	0.43	0.52	0.49	0.55	0.51	0.49	0.52	0.55	0.49	0.524	Matk	10	81252935	81263365	protein_coding	KNOWN
ENSMUSG00000004934	0.52	0.6	0.46	0.45	0.54	0.47	0.56	0.49	0.49	0.55	0.514	0.512	Pias4	10	81153266	81167923	protein_coding	KNOWN
ENSMUSG00000004936	0.52	0.51	0.51	0.5	0.51	0.51	0.51	0.51	0.52	0.52	0.51	0.514	Map2k1	9	64185770	64253631	protein_coding	KNOWN
ENSMUSG00000004937	0.45	0.47	0.46	0.46	0.49	0.49	0.45	0.48	0.45	0.48	0.466	0.47	Sgta	10	81044075	81060178	protein_coding	KNOWN
ENSMUSG00000004945	0.5	0.5	0.58	0.49	0.47	0.51	0.48	0.49	0.51	0.5	0.508	0.498	Tmem242	17	5410864	5440260	protein_coding	KNOWN
ENSMUSG00000004947	0.52	0.57	0.5	0.53	0.54	0.4	0.43	0.54	0.54	0.52	0.532	0.486	Dtx2	5	135994800	136032872	protein_coding	KNOWN
ENSMUSG00000004951	0.55	0.4	0.42	0.58	0.54	0.47	0.6	0.48	0.52	0.53	0.498	0.52	Hspb1	5	135887919	135889563	protein_coding	KNOWN
ENSMUSG00000004952	0.53	0.51	0.61	0.54	0.59	0.55	0.51	0.53	0.56	0.59	0.556	0.548	Rasa4	5	136083916	136111860	protein_coding	KNOWN
ENSMUSG00000004961	0.44	0.44	0.44	0.43	0.46	0.44	0.44	0.42	0.43	0.45	0.442	0.436	Syt5	7	4539768	4546567	protein_coding	KNOWN
ENSMUSG00000004980	0.5	0.49	0.5	0.49	0.49	0.5	0.49	0.51	0.49	0.5	0.494	0.498	Hnrnpa2b1	6	51460434	51469894	protein_coding	KNOWN
ENSMUSG00000004994	0.38	0.41	0.55	0.5	0.31	0.44	0.51	0.51	0.46	0.55	0.43	0.494	Ccdc130	8	84257795	84270380	protein_coding	KNOWN
ENSMUSG00000004996	0.46	0.37	0.56	0.38	0.53	0.64	0.43	0.52	0.53	0.53	0.46	0.53	Mri1	8	84249906	84257326	protein_coding	KNOWN
ENSMUSG00000005034	0.48	0.49	0.46	0.47	0.48	0.48	0.45	0.47	0.47	0.48	0.476	0.47	Prkacb	3	146729579	146812960	protein_coding	KNOWN
ENSMUSG00000005045	0.54	0.5	0.5	0.54	0.53	0.5	0.51	0.52	0.52	0.5	0.522	0.51	Chd5	4	152338651	152390194	protein_coding	KNOWN
ENSMUSG00000005054	0.53	0.52	0.53	0.48	0.46	0.51	0.54	0.52	0.5	0.53	0.504	0.52	Cstb	10	78425670	78427619	protein_coding	KNOWN
ENSMUSG00000005057	0.68	0.55	0.67	0.67	0.51	0.6	0.54	0.62	0.61	0.57	0.616	0.588	Sh2b2	5	136218149	136244903	protein_coding	KNOWN
ENSMUSG00000005069	0.49	0.54	0.49	0.46	0.44	0.53	0.46	0.5	0.5	0.51	0.484	0.5	Pex5	6	124396816	124415067	protein_coding	KNOWN
ENSMUSG00000005078	0.49	0.49	0.51	0.51	0.51	0.48	0.48	0.52	0.51	0.53	0.502	0.504	Jkamp	12	72085589	72101461	protein_coding	KNOWN
ENSMUSG00000005089	0.47	0.48	0.49	0.48	0.49	0.48	0.48	0.48	0.48	0.49	0.482	0.482	Slc1a2	2	102658659	102790784	protein_coding	KNOWN
ENSMUSG00000005103	0.51	0.51	0.5	0.48	0.48	0.51	0.47	0.47	0.49	0.48	0.496	0.484	Wdr1	5	38526814	38561666	protein_coding	KNOWN
ENSMUSG00000005124	0.54	0.55	0.54	0.52	0.56	0.55	0.56	0.52	0.59	0.55	0.542	0.554	Wisp1	15	66891320	66923201	protein_coding	KNOWN
ENSMUSG00000005125	0.49	0.54	0.47	0.49	0.48	0.51	0.52	0.54	0.53	0.5	0.494	0.52	Ndrg1	15	66929321	66969640	protein_coding	KNOWN
ENSMUSG00000005142	0.5	0.53	0.63	0.61	0.59	0.59	0.55	0.54	0.55	0.57	0.572	0.56	Man2b1	8	85083269	85098739	protein_coding	KNOWN
ENSMUSG00000005148	0.5	0.51	0.75	0.8	0.57	0.31	0.78	0.68	0.54	0.38	0.626	0.538	Klf5	14	99298691	99313405	protein_coding	KNOWN
ENSMUSG00000005161	0.56	0.57	0.59	0.56	0.51	0.56	0.55	0.54	0.54	0.57	0.558	0.552	Prdx2	8	84969587	84974834	protein_coding	KNOWN
ENSMUSG00000005198	0.49	0.5	0.44	0.53	0.5	0.49	0.52	0.47	0.49	0.49	0.492	0.492	Polr2a	11	69733997	69758637	protein_coding	KNOWN
ENSMUSG00000005204	0.52	0.5	0.51	0.5	0.56	0.52	0.52	0.51	0.52	0.53	0.518	0.52	Senp3	11	69673115	69682084	protein_coding	KNOWN
ENSMUSG00000005225	0.54	0.51	0.54	0.52	0.51	0.51	0.48	0.51	0.53	0.56	0.524	0.518	Plekha8	6	54595111	54645839	protein_coding	KNOWN
ENSMUSG00000005237	0.54	0.52	0.44	0.55	0.44	0.53	0.5	0.53	0.51	0.54	0.498	0.522	Dnahc2	11	69420809	69549110	protein_coding	KNOWN
ENSMUSG00000005262	0.54	0.57	0.53	0.53	0.55	0.54	0.54	0.56	0.54	0.54	0.544	0.544	Ufd1l	16	18811779	18835261	protein_coding	KNOWN
ENSMUSG00000005267	0.46	0.43	0.51	0.47	0.43	0.47	0.5	0.48	0.48	0.47	0.46	0.48	Zfp287	11	62700356	62731905	protein_coding	KNOWN
ENSMUSG00000005299	0.43	0.42	0.43	0.45	0.43	0.44	0.41	0.43	0.45	0.43	0.432	0.432	Letm1	5	33739673	33782817	protein_coding	KNOWN
ENSMUSG00000005312	0.51	0.51	0.5	0.52	0.49	0.49	0.52	0.5	0.51	0.52	0.506	0.508	Ubqln1	13	58176156	58215653	protein_coding	KNOWN
ENSMUSG00000005320	0.73	0.5	0.43	0.2	0.18	0.54	0.27	0.37	0.6	0.5	0.408	0.456	Fgfr4	13	55152640	55168759	protein_coding	KNOWN
ENSMUSG00000005338	0.53	0.53	0.51	0.51	0.52	0.53	0.52	0.53	0.52	0.53	0.52	0.526	Cadm3	1	173334254	173367695	protein_coding	KNOWN
ENSMUSG00000005354	0.48	0.51	0.47	0.53	0.51	0.5	0.49	0.52	0.5	0.51	0.5	0.504	Txn2	15	77915047	77929006	protein_coding	KNOWN
ENSMUSG00000005357	0.43	0.75	0.55	0.48	0.55	0.38	0.49	0.51	0.58	0.49	0.552	0.49	Slc1a6	10	78780496	78814825	protein_coding	KNOWN
ENSMUSG00000005360	0.47	0.47	0.47	0.5	0.48	0.48	0.47	0.48	0.47	0.48	0.478	0.476	Slc1a3	15	8634124	8710764	protein_coding	KNOWN
ENSMUSG00000005362	0.48	0.51	0.49	0.47	0.44	0.46	0.48	0.47	0.51	0.46	0.478	0.476	Crbn	6	106778249	106800074	protein_coding	KNOWN
ENSMUSG00000005370	0.54	0.5	0.47	0.49	0.47	0.55	0.52	0.48	0.51	0.51	0.494	0.514	Msh6	17	87975050	87990883	protein_coding	KNOWN
ENSMUSG00000005371	0.51	0.47	0.49	0.53	0.47	0.52	0.5	0.51	0.5	0.48	0.494	0.502	Fbxo11	17	87990859	88065291	protein_coding	KNOWN
ENSMUSG00000005374	0.43	0.41	0.42	0.43	0.4	0.41	0.42	0.46	0.41	0.43	0.418	0.426	Tbl2	5	135149657	135163873	protein_coding	KNOWN
ENSMUSG00000005378	0.51	0.54	0.57	0.46	0.53	0.47	0.42	0.47	0.48	0.51	0.522	0.47	Wbscr22	5	135052957	135064959	protein_coding	KNOWN
ENSMUSG00000005397	0.55	0.54	0.57	0.5	0.54	0.55	0.53	0.55	0.53	0.59	0.54	0.55	Nid1	13	13437602	13512275	protein_coding	KNOWN
ENSMUSG00000005410	0.33	0.37	0.32	0.41	0.34	0.33	0.42	0.39	0.35	0.38	0.354	0.374	Mcm5	8	75109528	75128439	protein_coding	KNOWN
ENSMUSG00000005413	0.42	0.48	0.51	0.47	0.37	0.57	0.46	0.48	0.46	0.43	0.45	0.48	Hmox1	8	75093591	75100596	protein_coding	KNOWN
ENSMUSG00000005417	0.49	0.48	0.51	0.48	0.5	0.49	0.49	0.5	0.49	0.49	0.492	0.492	Mprip	11	59661305	59780860	protein_coding	KNOWN
ENSMUSG00000005442	0.5	0.48	0.5	0.47	0.5	0.48	0.52	0.49	0.48	0.49	0.49	0.492	Cic	7	25267704	25294159	protein_coding	KNOWN
ENSMUSG00000005447	0.39	0.46	0.35	0.44	0.48	0.45	0.42	0.42	0.49	0.45	0.424	0.446	Pafah1b3	7	25295049	25297986	protein_coding	KNOWN
ENSMUSG00000005469	0.54	0.55	0.52	0.5	0.51	0.53	0.54	0.49	0.46	0.51	0.524	0.506	Prkaca	8	83972978	83996445	protein_coding	KNOWN
ENSMUSG00000005481	0.49	0.51	0.46	0.55	0.51	0.48	0.54	0.5	0.53	0.5	0.504	0.51	Ddx39	8	83715177	83726892	protein_coding	KNOWN
ENSMUSG00000005483	0.54	0.49	0.49	0.51	0.52	0.54	0.5	0.54	0.5	0.47	0.51	0.51	Dnajb1	8	83608175	83611902	protein_coding	KNOWN
ENSMUSG00000005501	0.46	0.44	0.47	0.55	0.43	0.46	0.43	0.46	0.45	0.48	0.47	0.456	Usp40	1	87945121	88008551	protein_coding	KNOWN
ENSMUSG00000005505	0.51	0.53	0.51	0.47	0.41	0.43	0.5	0.47	0.35	0.53	0.486	0.456	Kbtbd4	2	90904740	90911626	protein_coding	KNOWN
ENSMUSG00000005510	0.51	0.51	0.51	0.5	0.51	0.51	0.5	0.5	0.51	0.5	0.508	0.504	Ndufs3	2	90894634	90904827	protein_coding	KNOWN
ENSMUSG00000005514	0.47	0.47	0.46	0.48	0.5	0.48	0.48	0.49	0.45	0.46	0.476	0.472	Por	5	135670033	135735326	protein_coding	KNOWN
ENSMUSG00000005533	0.51	0.52	0.53	0.55	0.51	0.53	0.53	0.5	0.49	0.5	0.524	0.51	Igf1r	7	67952859	68226780	protein_coding	KNOWN
ENSMUSG00000005534	0.53	0.59	0.63	0.57	0.62	0.6	0.58	0.59	0.62	0.6	0.588	0.598	Insr	8	3150922	3279617	protein_coding	KNOWN
ENSMUSG00000005547	0.49	0.6	0.45	0.5	0.54	0.55	0.56	0.52	0.5	0.61	0.516	0.548	Cyp2a5	7	26835305	26843548	protein_coding	KNOWN
ENSMUSG00000005566	0.47	0.53	0.46	0.49	0.47	0.46	0.47	0.47	0.48	0.46	0.484	0.468	Trim28	7	13024152	13031035	protein_coding	KNOWN
ENSMUSG00000005575	0.41	0.47	0.49	0.42	0.41	0.48	0.43	0.43	0.41	0.51	0.44	0.452	Ube2m	7	13035120	13038275	protein_coding	KNOWN
ENSMUSG00000005609	0.55	0.58	0.56	0.64	0.62	0.54	0.63	0.53	0.55	0.56	0.59	0.562	Ctr9	7	111028951	111056377	protein_coding	KNOWN
ENSMUSG00000005610	0.49	0.5	0.49	0.49	0.5	0.49	0.5	0.49	0.5	0.5	0.494	0.496	Eif4g2	7	111067985	111083030	protein_coding	KNOWN
ENSMUSG00000005621	0.54	0.47	0.5	0.43	0.52	0.49	0.48	0.51	0.53	0.52	0.492	0.506	Zfp592	7	80993681	81045164	protein_coding	KNOWN
ENSMUSG00000005656	0.48	0.57	0.55	0.51	0.48	0.5	0.48	0.51	0.48	0.48	0.518	0.49	Snx6	12	54746349	54795703	protein_coding	KNOWN
ENSMUSG00000005667	0.59	0.5	0.62	0.52	0.43	0.52	0.41	0.62	0.6	0.47	0.532	0.524	Mthfd2	6	83305691	83317606	protein_coding	KNOWN
ENSMUSG00000005672	0.47	0.5	0.49	0.51	0.47	0.5	0.5	0.5	0.47	0.47	0.488	0.488	Kit	5	75574916	75656722	protein_coding	KNOWN
ENSMUSG00000005682	0.52	0.57	0.46	0.32	0.58	0.59	0.53	0.51	0.45	0.49	0.49	0.514	Pan2	10	128303335	128321358	protein_coding	KNOWN
ENSMUSG00000005683	0.5	0.51	0.52	0.5	0.53	0.52	0.52	0.51	0.52	0.52	0.512	0.518	Cs	10	128337832	128362479	protein_coding	KNOWN
ENSMUSG00000005686	0.57	0.52	0.53	0.53	0.49	0.53	0.5	0.53	0.52	0.52	0.528	0.52	Ampd3	7	110768206	110812405	protein_coding	KNOWN
ENSMUSG00000005687	0.68	0.46	0.62	0.53	0.6	0.55	0.53	0.55	0.56	0.6	0.578	0.558	Bcas2	3	103171655	103179166	protein_coding	KNOWN
ENSMUSG00000005698	0.49	0.55	0.52	0.48	0.61	0.5	0.53	0.51	0.47	0.52	0.53	0.506	Ctcf	8	105636568	105682922	protein_coding	KNOWN
ENSMUSG00000005718	0.47	0.49	0.61	0.46	0.47	0.45	0.54	0.61	0.47	0.49	0.5	0.512	Tfap4	16	4544661	4559720	protein_coding	KNOWN
ENSMUSG00000005732	0.52	0.59	0.64	0.54	0.56	0.56	0.59	0.58	0.64	0.63	0.57	0.6	Ranbp1	16	18239784	18248732	protein_coding	KNOWN
ENSMUSG00000005779	0.52	0.53	0.55	0.48	0.53	0.47	0.5	0.5	0.5	0.5	0.522	0.494	Psmb4	3	94884093	94886961	protein_coding	KNOWN
ENSMUSG00000005802	0.48	0.47	0.46	0.48	0.47	0.47	0.44	0.45	0.45	0.46	0.472	0.454	Slc30a4	2	122681233	122702663	protein_coding	KNOWN
ENSMUSG00000005804	0.48	0.47	0.46	0.48	0.51	0.47	0.47	0.47	0.5	0.44	0.48	0.47	Pldn	2	122738503	122749475	protein_coding	KNOWN
ENSMUSG00000005813	0.52	0.56	0.51	0.51	0.54	0.52	0.56	0.47	0.51	0.57	0.528	0.526	Metap1	3	138458960	138489382	protein_coding	KNOWN
ENSMUSG00000005823	0.45	0.51	0.5	0.47	0.47	0.47	0.52	0.44	0.48	0.5	0.48	0.482	Gpr108	17	57234914	57247641	protein_coding	KNOWN
ENSMUSG00000005846	0.46	0.46	0.45	0.5	0.52	0.46	0.48	0.46	0.47	0.5	0.478	0.474	Rsl1d1	16	11192970	11203331	protein_coding	KNOWN
ENSMUSG00000005864	0.13	0.08	0.5	0.25	0.26	0.33	0.57	0.64	0.17	0.42	0.244	0.426	Cnga2	X	71991849	72010218	protein_coding	KNOWN
ENSMUSG00000005871	0.56	0.56	0.54	0.55	0.56	0.56	0.55	0.55	0.54	0.55	0.554	0.55	Apc	18	34220924	34322189	protein_coding	KNOWN
ENSMUSG00000005873	0.52	0.52	0.51	0.56	0.51	0.52	0.51	0.51	0.52	0.51	0.524	0.514	Reep5	18	34344889	34373415	protein_coding	KNOWN
ENSMUSG00000005881	0.48	0.5	0.45	0.52	0.5	0.49	0.51	0.48	0.45	0.49	0.49	0.484	Ergic3	2	156008045	156018279	protein_coding	KNOWN
ENSMUSG00000005882	0.51	0.53	0.52	0.54	0.57	0.53	0.5	0.49	0.52	0.51	0.534	0.51	Uqcc	2	155846894	155930310	protein_coding	KNOWN
ENSMUSG00000005886	0.5	0.5	0.49	0.47	0.49	0.48	0.51	0.5	0.48	0.47	0.49	0.488	Ncoa2	1	13139105	13374083	protein_coding	KNOWN
ENSMUSG00000005892	0.61	0.61	0.61	0.63	0.6	0.59	0.6	0.59	0.58	0.59	0.612	0.59	Trh	6	92242061	92244650	protein_coding	KNOWN
ENSMUSG00000005893	0.49	0.5	0.49	0.54	0.53	0.49	0.5	0.51	0.49	0.51	0.51	0.5	Nr2c2	6	92091390	92173057	protein_coding	KNOWN
ENSMUSG00000005897	0.49	0.51	0.57	0.58	0.52	0.54	0.59	0.51	0.53	0.5	0.534	0.534	Nr2c1	10	94148023	94197211	protein_coding	KNOWN
ENSMUSG00000005899	0.51	0.54	0.47	0.58	0.49	0.58	0.51	0.56	0.53	0.53	0.518	0.542	Smpd4	16	17619354	17644828	protein_coding	KNOWN
ENSMUSG00000005936	0.51	0.53	0.48	0.51	0.51	0.54	0.52	0.51	0.53	0.52	0.508	0.524	Kctd20	17	28951950	28969549	protein_coding	KNOWN
ENSMUSG00000005958	0.41	0.52	0.48	0.53	0.54	0.51	0.49	0.52	0.52	0.55	0.496	0.518	Ephb3	16	21204755	21223305	protein_coding	KNOWN
ENSMUSG00000005973	0.5	0.56	0.56	0.48	0.52	0.57	0.5	0.55	0.54	0.57	0.524	0.546	Rcn1	2	105386291	105399319	protein_coding	KNOWN
ENSMUSG00000005980	0.64	0.76	0.9	0.64	0.49	0.58	0.54	0.7	0.69	0.72	0.686	0.646	Dnase1	16	4036942	4040024	protein_coding	KNOWN
ENSMUSG00000005981	0.47	0.52	0.51	0.5	0.55	0.49	0.48	0.48	0.47	0.45	0.51	0.474	Trap1	16	4039971	4077827	protein_coding	KNOWN
ENSMUSG00000005982	0.53	0.49	0.54	0.53	0.55	0.51	0.5	0.51	0.51	0.5	0.528	0.506	Nat15	16	3872375	3904770	protein_coding	KNOWN
ENSMUSG00000005994	0.5	0.5	0.41	0.35	0.48	0.35	0.43	0.45	0.35	0.47	0.448	0.41	Tyrp1	4	80834123	80851719	protein_coding	KNOWN
ENSMUSG00000006005	0.5	0.48	0.52	0.51	0.51	0.5	0.5	0.49	0.49	0.52	0.504	0.5	Tpr	1	150392838	150449935	protein_coding	KNOWN
ENSMUSG00000006010	0.53	0.57	0.52	0.58	0.5	0.54	0.55	0.53	0.54	0.55	0.54	0.542	BC003331	1	150361305	150393080	protein_coding	KNOWN
ENSMUSG00000006021	0.36	0.42	0.46	0.45	0.46	0.43	0.44	0.48	0.46	0.51	0.43	0.464	Kptn	7	16119895	16127516	protein_coding	KNOWN
ENSMUSG00000006024	0.54	0.5	0.53	0.51	0.5	0.53	0.54	0.53	0.54	0.52	0.516	0.532	Napa	7	16098458	16117975	protein_coding	KNOWN
ENSMUSG00000006050	0.49	0.49	0.58	0.53	0.51	0.59	0.5	0.55	0.52	0.56	0.52	0.544	Sra1	18	36666681	36671196	protein_coding	KNOWN
ENSMUSG00000006057	0.53	0.5	0.51	0.49	0.48	0.54	0.54	0.52	0.51	0.53	0.502	0.528	Atp5g1	11	96068852	96075670	protein_coding	KNOWN
ENSMUSG00000006058	0.45	0.52	0.47	0.52	0.5	0.48	0.43	0.51	0.58	0.5	0.492	0.5	Snf8	11	96034885	96047430	protein_coding	KNOWN
ENSMUSG00000006095	0.49	0.5	0.46	0.55	0.5	0.5	0.52	0.5	0.47	0.47	0.5	0.492	Tbcb	7	30224131	30232272	protein_coding	KNOWN
ENSMUSG00000006127	0.43	0.46	0.5	0.47	0.45	0.5	0.49	0.48	0.51	0.5	0.462	0.496	Inpp5k	11	75630988	75648871	protein_coding	KNOWN
ENSMUSG00000006134	0.52	0.5	0.5	0.57	0.47	0.53	0.53	0.51	0.48	0.5	0.512	0.51	Crkl	16	17451987	17486255	protein_coding	KNOWN
ENSMUSG00000006154	0.74	0.98	0.95	0.95	0.78	0.96	0.95	0.94	0.96	0.96	0.88	0.954	Eps8l1	7	4460674	4479404	protein_coding	KNOWN
ENSMUSG00000006191	0.48	0.45	0.48	0.52	0.46	0.48	0.47	0.42	0.48	0.47	0.478	0.464	Cdkal1	13	29191746	29855674	protein_coding	KNOWN
ENSMUSG00000006205	0.53	0.55	0.54	0.54	0.52	0.53	0.53	0.53	0.5	0.53	0.536	0.524	Htra1	7	130936111	130985660	protein_coding	KNOWN
ENSMUSG00000006215	0.47	0.49	0.46	0.5	0.41	0.48	0.46	0.41	0.47	0.44	0.466	0.452	Zbtb17	4	141444654	141467930	protein_coding	KNOWN
ENSMUSG00000006218	0.62	0.43	0.6	0.63	0.45	0.49	0.49	0.48	0.5	0.61	0.546	0.514	Fam131c	4	141368220	141384175	protein_coding	KNOWN
ENSMUSG00000006262	0.42	0.47	0.43	0.49	0.48	0.48	0.43	0.47	0.45	0.48	0.458	0.462	Mob1b	5	88720855	88762058	protein_coding	KNOWN
ENSMUSG00000006273	0.51	0.51	0.5	0.51	0.51	0.51	0.51	0.5	0.51	0.51	0.508	0.508	Atp6v1b2	8	69088646	69113711	protein_coding	KNOWN
ENSMUSG00000006281	0.49	0.62	0.48	0.53	0.38	0.54	0.6	0.67	0.51	0.52	0.5	0.568	Tep1	14	50824062	50870560	protein_coding	KNOWN
ENSMUSG00000006288	0.48	0.45	0.54	0.51	0.44	0.51	0.49	0.44	0.45	0.47	0.484	0.472	Ttc5	14	50765415	50785518	protein_coding	KNOWN
ENSMUSG00000006289	0.52	0.53	0.53	0.55	0.52	0.51	0.49	0.52	0.54	0.48	0.53	0.508	Osgep	14	50906478	50924893	protein_coding	KNOWN
ENSMUSG00000006301	0.55	0.49	0.55	0.58	0.47	0.52	0.54	0.5	0.48	0.51	0.528	0.51	Tmbim1	1	74288247	74305622	protein_coding	KNOWN
ENSMUSG00000006304	0.46	0.52	0.52	0.49	0.51	0.48	0.49	0.47	0.52	0.48	0.5	0.488	Arpc2	1	74236497	74268209	protein_coding	KNOWN
ENSMUSG00000006315	0.63	0.5	0.42	0.52	0.68	0.64	0.38	0.51	0.61	0.56	0.55	0.54	Tmem147	7	30727701	30729534	protein_coding	KNOWN
ENSMUSG00000006333	0.43	0.41	0.36	0.42	0.41	0.46	0.42	0.39	0.42	0.4	0.406	0.418	Rps9	7	3703993	3706901	protein_coding	KNOWN
ENSMUSG00000006335	0.45	0.48	0.5	0.48	0.49	0.52	0.51	0.44	0.48	0.56	0.48	0.502	Tfpt	7	3620324	3629929	protein_coding	KNOWN
ENSMUSG00000006342	0.51	0.62	0.69	0.63	0.64	0.54	0.64	0.63	0.57	0.63	0.618	0.602	Susd2	10	75636619	75644008	protein_coding	KNOWN
ENSMUSG00000006344	0.43	0.4	0.67	0.52	0.53	0.59	0.51	0.4	0.47	0.46	0.51	0.486	Ggt5	10	75589381	75616968	protein_coding	KNOWN
ENSMUSG00000006360	0.5	0.58	0.33	0.36	0.58	0.85	0.53	0.46	0.54	0.45	0.47	0.566	Crip1	12	113152012	113153877	protein_coding	KNOWN
ENSMUSG00000006362	0.45	0.54	0.44	0.52	0.5	0.47	0.54	0.47	0.48	0.44	0.49	0.48	Cbfa2t3	8	122628739	122699109	protein_coding	KNOWN
ENSMUSG00000006369	0.48	0.44	0.5	0.4	0.51	0.33	0.53	0.45	0.42	0.36	0.466	0.418	Fbln1	15	85205949	85286535	protein_coding	KNOWN
ENSMUSG00000006373	0.18	0.29	0.28	0.25	0.29	0.41	0.4	0.57	0.28	0.31	0.258	0.394	Pgrmc1	X	36598206	36606079	protein_coding	KNOWN
ENSMUSG00000006378	0.54	0.67	0.6	0.59	0.63	0.57	0.61	0.61	0.67	0.54	0.606	0.6	Gcat	15	79030874	79043558	protein_coding	KNOWN
ENSMUSG00000006386	0.6	0.45	0.44	0.51	0.47	0.46	0.53	0.47	0.53	0.52	0.494	0.502	Tek	4	94739289	94874976	protein_coding	KNOWN
ENSMUSG00000006395	0.51	0.65	0.43	0.64	0.62	0.6	0.53	0.55	0.62	0.53	0.57	0.566	Hyi	4	118359990	118362744	polymorphic_pseudogene	KNOWN
ENSMUSG00000006412	0.48	0.47	0.49	0.5	0.44	0.48	0.47	0.5	0.48	0.47	0.476	0.48	Pfdn2	1	171345670	171359254	protein_coding	KNOWN
ENSMUSG00000006435	0.47	0.47	0.47	0.46	0.44	0.45	0.48	0.51	0.47	0.44	0.462	0.47	Neurl1a	19	47178820	47259440	protein_coding	KNOWN
ENSMUSG00000006442	0.49	0.41	0.45	0.52	0.4	0.46	0.5	0.53	0.54	0.54	0.454	0.514	Srm	4	148591503	148594993	protein_coding	KNOWN
ENSMUSG00000006445	0.47	0.52	0.53	0.54	0.49	0.48	0.54	0.5	0.46	0.47	0.51	0.49	Epha2	4	141301240	141329384	protein_coding	KNOWN
ENSMUSG00000006456	0.54	0.45	0.51	0.59	0.47	0.5	0.52	0.52	0.39	0.52	0.512	0.49	Rbm14	19	4800569	4811634	protein_coding	KNOWN
ENSMUSG00000006463	0.45	0.46	0.59	0.48	0.46	0.51	0.49	0.5	0.48	0.43	0.488	0.482	Zdhhc24	19	4878668	4885397	protein_coding	KNOWN
ENSMUSG00000006464	0.5	0.55	0.54	0.5	0.53	0.53	0.51	0.56	0.53	0.54	0.524	0.534	Bbs1	19	4886898	4906627	protein_coding	KNOWN
ENSMUSG00000006471	0.55	0.53	0.47	0.55	0.46	0.58	0.55	0.52	0.54	0.53	0.512	0.544	Ndor1	2	25244821	25256022	protein_coding	KNOWN
ENSMUSG00000006476	0.53	0.52	0.53	0.49	0.48	0.49	0.5	0.51	0.49	0.5	0.51	0.498	Nelf	2	25054355	25062881	protein_coding	KNOWN
ENSMUSG00000006494	0.45	0.46	0.48	0.51	0.47	0.46	0.45	0.47	0.47	0.45	0.474	0.46	Pdk1	2	71873224	71903858	protein_coding	KNOWN
ENSMUSG00000006517	0.46	0.45	0.4	0.42	0.37	0.44	0.47	0.47	0.55	0.47	0.42	0.48	Mvd	8	122433596	122443422	protein_coding	KNOWN
ENSMUSG00000006519	0.47	0.47	0.5	0.44	0.4	0.5	0.51	0.39	0.52	0.53	0.456	0.49	Cyba	8	122424772	122432940	protein_coding	KNOWN
ENSMUSG00000006522	0.59	0.54	0.53	0.55	0.5	0.53	0.57	0.54	0.56	0.55	0.542	0.55	Itih3	14	30908573	30923760	protein_coding	KNOWN
ENSMUSG00000006526	0.48	0.58	0.5	0.53	0.49	0.48	0.5	0.47	0.52	0.5	0.516	0.494	Tmem110	14	30825590	30876986	protein_coding	KNOWN
ENSMUSG00000006527	0.46	0.49	0.47	0.46	0.51	0.49	0.5	0.5	0.47	0.47	0.478	0.486	Sfmbt1	14	30714849	30822713	protein_coding	KNOWN
ENSMUSG00000006542	0.4	0.11	0.33	0.34	0.48	0.34	0.23	0.28	0.37	0.39	0.332	0.322	Prkag3	1	74739499	74749221	protein_coding	KNOWN
ENSMUSG00000006567	0.47	0.31	0.45	0.46	0.52	0.45	0.36	0.45	0.42	0.41	0.442	0.418	Atp7b	8	21992785	22060305	protein_coding	KNOWN
ENSMUSG00000006574	0.45	0.55	0.86	0.65	0.45	0.5	0.5	0.59	0.53	0.2	0.592	0.464	Slc4a1	11	102348824	102366203	protein_coding	KNOWN
ENSMUSG00000006575	0.51	0.53	0.51	0.5	0.51	0.52	0.51	0.52	0.5	0.5	0.512	0.51	Rundc3a	11	102393403	102402555	protein_coding	KNOWN
ENSMUSG00000006576	0.51	0.52	0.56	0.49	0.55	0.52	0.51	0.5	0.51	0.53	0.526	0.514	Slc4a3	1	75546266	75562172	protein_coding	KNOWN
ENSMUSG00000006585	0.34	0.56	0.61	0.36	0.5	0.43	0.39	0.3	0.37	0.42	0.474	0.382	Cdt1	8	122568015	122573128	protein_coding	KNOWN
ENSMUSG00000006589	0.46	0.53	0.38	0.42	0.56	0.46	0.5	0.47	0.5	0.41	0.47	0.468	Aprt	8	122574637	122576907	protein_coding	KNOWN
ENSMUSG00000006599	0.52	0.48	0.57	0.53	0.5	0.53	0.54	0.52	0.5	0.54	0.52	0.526	Gtf2h1	7	46796103	46823800	protein_coding	KNOWN
ENSMUSG00000006611	0.35	0.42	0.37	0.45	0.54	0.49	0.41	0.52	0.48	0.5	0.426	0.48	Hfe	13	23702034	23710854	protein_coding	KNOWN
ENSMUSG00000006649	0.84	0.5	0.76	0.2	0.61	0.72	0.5	0.61	0.56	0.11	0.582	0.5	Nphs1	7	30458315	30487223	protein_coding	KNOWN
ENSMUSG00000006651	0.53	0.52	0.51	0.53	0.52	0.53	0.52	0.51	0.53	0.52	0.522	0.522	Aplp1	7	30434981	30445582	protein_coding	KNOWN
ENSMUSG00000006675	0.48	0.44	0.48	0.47	0.47	0.48	0.48	0.51	0.52	0.47	0.468	0.492	P4htm	9	108578826	108597600	protein_coding	KNOWN
ENSMUSG00000006676	0.48	0.51	0.49	0.49	0.5	0.49	0.49	0.47	0.51	0.5	0.494	0.492	Usp19	9	108490676	108502333	protein_coding	KNOWN
ENSMUSG00000006678	0.11	0.23	0.33	0.27	0.16	0.4	0.52	0.48	0.26	0.27	0.22	0.386	Pola1	X	93304767	93632155	protein_coding	KNOWN
ENSMUSG00000006699	0.53	0.54	0.5	0.51	0.52	0.54	0.52	0.53	0.52	0.51	0.52	0.524	Cdc42	4	137319696	137357720	protein_coding	KNOWN
ENSMUSG00000006705	0.56	0.54	0.51	0.55	0.6	0.52	0.56	0.56	0.56	0.55	0.552	0.55	Pknox1	17	31564749	31607680	protein_coding	KNOWN
ENSMUSG00000006715	0.84	0.8	0.87	0.79	0.71	0.83	0.79	0.77	0.78	0.7	0.802	0.774	Gmnn	13	24751845	24761923	protein_coding	KNOWN
ENSMUSG00000006717	0.57	0.55	0.6	0.55	0.55	0.59	0.55	0.55	0.54	0.54	0.564	0.554	Acot13	13	24817948	24831517	protein_coding	KNOWN
ENSMUSG00000006728	0.59	0.57	0.55	0.57	0.62	0.54	0.54	0.55	0.56	0.53	0.58	0.544	Cdk4	10	127063534	127067920	protein_coding	KNOWN
ENSMUSG00000006731	0.52	0.55	0.56	0.52	0.47	0.54	0.54	0.54	0.54	0.55	0.524	0.542	B4galnt1	10	127165156	127172340	protein_coding	KNOWN
ENSMUSG00000006732	0.76	0.74	0.66	0.75	0.62	0.72	0.8	0.68	0.73	0.75	0.706	0.736	Mettl1	10	127041414	127046365	protein_coding	KNOWN
ENSMUSG00000006736	0.57	0.55	0.59	0.51	0.54	0.56	0.55	0.51	0.52	0.56	0.552	0.54	Tspan31	10	127067317	127070261	protein_coding	KNOWN
ENSMUSG00000006740	0.51	0.5	0.49	0.51	0.48	0.5	0.5	0.5	0.51	0.5	0.498	0.502	Kif5b	18	6201002	6242174	protein_coding	KNOWN
ENSMUSG00000006763	0.38	0.4	0.4	0.43	0.41	0.43	0.47	0.41	0.46	0.45	0.404	0.444	Saal1	7	46686108	46710680	protein_coding	KNOWN
ENSMUSG00000006777	0.67	0.5	0.67	0.25	0.47	1	0	0.46	0.43	0.71	0.512	0.52	Krt23	11	99477974	99493137	protein_coding	KNOWN
ENSMUSG00000006782	0.49	0.48	0.49	0.45	0.5	0.5	0.49	0.48	0.49	0.48	0.482	0.488	Cnp	11	100574904	100591729	protein_coding	KNOWN
ENSMUSG00000006800	0.48	0.47	0.46	0.5	0.54	0.5	0.49	0.52	0.51	0.49	0.49	0.502	Sulf2	2	166073089	166155663	protein_coding	KNOWN
ENSMUSG00000006818	0.52	0.48	0.5	0.48	0.48	0.49	0.47	0.5	0.49	0.48	0.492	0.486	Sod2	17	13007839	13018119	protein_coding	KNOWN
ENSMUSG00000006850	0.58	0.6	0.56	0.56	0.51	0.62	0.54	0.49	0.62	0.55	0.562	0.564	Tmco6	18	36735068	36742391	protein_coding	KNOWN
ENSMUSG00000006906	0.49	0.47	0.51	0.56	0.46	0.51	0.5	0.5	0.52	0.47	0.498	0.5	Stambp	6	83543206	83572504	protein_coding	KNOWN
ENSMUSG00000006920	0.47	0.46	0.52	0.48	0.43	0.49	0.5	0.49	0.49	0.52	0.472	0.498	Ezh1	11	101191115	101226463	protein_coding	KNOWN
ENSMUSG00000006930	0.56	0.56	0.55	0.57	0.54	0.55	0.54	0.55	0.55	0.56	0.556	0.55	Hap1	11	100347327	100356128	protein_coding	KNOWN
ENSMUSG00000006931	0.5	0.43	0.43	0.53	0.51	0.51	0.49	0.48	0.46	0.5	0.48	0.488	Leprel4	11	100408456	100414836	protein_coding	KNOWN
ENSMUSG00000006932	0.5	0.51	0.48	0.49	0.51	0.49	0.5	0.49	0.49	0.5	0.498	0.494	Ctnnb1	9	120929216	120960507	protein_coding	KNOWN
ENSMUSG00000006941	0.45	0.47	0.47	0.46	0.5	0.45	0.47	0.49	0.45	0.47	0.47	0.466	Eif1b	9	120492606	120495327	protein_coding	KNOWN
ENSMUSG00000007021	0.51	0.49	0.44	0.53	0.49	0.51	0.51	0.53	0.5	0.53	0.492	0.516	Syngr3	17	24685092	24689955	protein_coding	KNOWN
ENSMUSG00000007036	0.49	0.56	0.49	0.52	0.51	0.55	0.5	0.51	0.47	0.48	0.514	0.502	Abhd16a	17	35089263	35102987	protein_coding	KNOWN
ENSMUSG00000007038	0.52	0.52	0.54	0.6	0.58	0.56	0.55	0.53	0.55	0.54	0.552	0.546	Neu1	17	34931253	34935953	protein_coding	KNOWN
ENSMUSG00000007097	0.54	0.54	0.54	0.58	0.53	0.53	0.53	0.54	0.53	0.53	0.546	0.532	Atp1a2	1	172271709	172298064	protein_coding	KNOWN
ENSMUSG00000007207	0.46	0.44	0.5	0.45	0.52	0.51	0.46	0.49	0.47	0.48	0.474	0.482	Stx1a	5	135023482	135051100	protein_coding	KNOWN
ENSMUSG00000007216	0.43	0.44	0.43	0.47	0.46	0.46	0.42	0.43	0.45	0.45	0.446	0.442	Zfp775	6	48613180	48623227	protein_coding	KNOWN
ENSMUSG00000007338	0.48	0.45	0.48	0.5	0.49	0.46	0.47	0.49	0.47	0.48	0.48	0.474	Mrpl49	19	6053630	6057751	protein_coding	KNOWN
ENSMUSG00000007415	0.54	0.49	0.46	0.55	0.55	0.45	0.52	0.51	0.5	0.55	0.518	0.506	Gatad1	5	3632932	3647934	protein_coding	KNOWN
ENSMUSG00000007440	0.48	0.51	0.51	0.46	0.48	0.47	0.48	0.48	0.48	0.5	0.488	0.482	Pcdhac1	18	36930285	37187657	protein_coding	KNOWN
ENSMUSG00000007458	0.49	0.48	0.52	0.5	0.52	0.49	0.49	0.51	0.51	0.52	0.502	0.504	M6pr	6	122308720	122317680	protein_coding	KNOWN
ENSMUSG00000007476	0.4	0.39	0.39	0.38	0.41	0.38	0.39	0.41	0.37	0.38	0.394	0.386	Lrrc8a	2	30237715	30282148	protein_coding	KNOWN
ENSMUSG00000007564	0.5	0.5	0.48	0.48	0.5	0.49	0.48	0.49	0.5	0.5	0.492	0.492	Ppp2r1a	17	20945311	20965916	protein_coding	KNOWN
ENSMUSG00000007570	0.47	0.49	0.48	0.47	0.48	0.55	0.49	0.48	0.48	0.5	0.478	0.5	Fance	17	28313530	28326568	protein_coding	KNOWN
ENSMUSG00000007589	0.48	0.54	0.5	0.54	0.47	0.52	0.52	0.49	0.52	0.5	0.506	0.51	Tinf2	14	55679083	55681817	protein_coding	KNOWN
ENSMUSG00000007594	0.36	0.4	0.45	0.41	0.43	0.4	0.4	0.41	0.38	0.42	0.41	0.402	Hapln4	8	70083529	70090862	protein_coding	KNOWN
ENSMUSG00000007603	0.46	0.46	0.45	0.43	0.52	0.47	0.56	0.51	0.45	0.5	0.464	0.498	Dus3l	17	56764751	56770092	protein_coding	KNOWN
ENSMUSG00000007610	0.51	0.41	0.6	0.43	0.49	0.54	0.41	0.47	0.52	0.48	0.488	0.484	Gtpbp3	8	71488103	71499583	protein_coding	KNOWN
ENSMUSG00000007613	0.51	0.47	0.47	0.52	0.53	0.53	0.53	0.5	0.49	0.52	0.5	0.514	Tgfbr1	4	47353222	47414931	protein_coding	KNOWN
ENSMUSG00000007617	0.48	0.47	0.49	0.46	0.49	0.5	0.51	0.49	0.47	0.52	0.478	0.498	Homer1	13	93303757	93404129	protein_coding	KNOWN
ENSMUSG00000007653	0.49	0.45	0.5	0.43	0.47	0.47	0.47	0.48	0.47	0.47	0.468	0.472	Gabrb2	11	42419757	42629028	protein_coding	KNOWN
ENSMUSG00000007659	0.55	0.58	0.63	0.58	0.54	0.42	0.39	0.38	0.37	0.41	0.576	0.394	Bcl2l1	2	152780668	152831728	protein_coding	KNOWN
ENSMUSG00000007670	0.52	0.54	0.52	0.51	0.51	0.53	0.55	0.53	0.56	0.55	0.52	0.544	Khsrp	17	57021058	57031507	protein_coding	KNOWN
ENSMUSG00000007682	0.49	0.51	0.49	0.5	0.51	0.49	0.46	0.49	0.49	0.48	0.5	0.482	Dio2	12	90724554	90738438	protein_coding	KNOWN
ENSMUSG00000007721	0.49	0.51	0.56	0.49	0.53	0.48	0.48	0.51	0.52	0.5	0.516	0.498	Ccdc124	8	70868227	70873490	protein_coding	KNOWN
ENSMUSG00000007739	0.42	0.44	0.4	0.42	0.44	0.48	0.48	0.44	0.47	0.42	0.424	0.458	Cct4	11	22990519	23003780	protein_coding	KNOWN
ENSMUSG00000007783	0.46	0.5	0.5	0.49	0.49	0.51	0.52	0.51	0.51	0.5	0.488	0.51	Cpt1c	7	44959373	44974851	protein_coding	KNOWN
ENSMUSG00000007812	0.49	0.5	0.49	0.52	0.54	0.47	0.51	0.51	0.48	0.51	0.508	0.496	Zfp655	5	145231723	145247302	protein_coding	KNOWN
ENSMUSG00000007815	0.52	0.52	0.53	0.52	0.53	0.51	0.52	0.53	0.51	0.51	0.524	0.516	Rhoa	9	108306205	108337939	protein_coding	KNOWN
ENSMUSG00000007817	0.53	0.51	0.54	0.53	0.54	0.52	0.53	0.54	0.53	0.5	0.53	0.524	Zmiz1	14	25459185	25666743	protein_coding	KNOWN
ENSMUSG00000007827	0.54	0.55	0.55	0.45	0.62	0.56	0.57	0.59	0.57	0.59	0.542	0.576	Ankrd26	6	118502564	118562256	protein_coding	KNOWN
ENSMUSG00000007836	0.49	0.5	0.49	0.5	0.48	0.48	0.5	0.5	0.5	0.5	0.492	0.496	Hnrnpa0	13	58125879	58128556	protein_coding	KNOWN
ENSMUSG00000007850	0.49	0.5	0.5	0.51	0.47	0.47	0.47	0.49	0.48	0.5	0.494	0.482	Hnrnph1	11	50376990	50386528	protein_coding	KNOWN
ENSMUSG00000007867	0.46	0.45	0.53	0.57	0.51	0.59	0.56	0.49	0.51	0.62	0.504	0.554	1700019E19Rik	12	86082561	86162458	protein_coding	KNOWN
ENSMUSG00000007872	0.37	0.5	0.65	0.42	0.55	0.22	0.5	0.45	0.5	0.4	0.498	0.414	Id3	4	136143497	136145755	protein_coding	KNOWN
ENSMUSG00000007877	0.29	0.47	0.4	0.44	0.36	0.41	0.5	0.52	0.39	0.5	0.392	0.464	Tcap	11	98383811	98384953	protein_coding	KNOWN
ENSMUSG00000007880	0.51	0.51	0.54	0.59	0.55	0.51	0.5	0.53	0.46	0.51	0.54	0.502	Arid1a	4	133679008	133756769	protein_coding	KNOWN
ENSMUSG00000007891	0.52	0.51	0.5	0.5	0.51	0.51	0.52	0.52	0.53	0.52	0.508	0.52	Ctsd	7	142371148	142388038	protein_coding	KNOWN
ENSMUSG00000007892	0.48	0.48	0.49	0.43	0.49	0.47	0.49	0.51	0.51	0.51	0.474	0.498	Rplp1	9	61913284	61914538	protein_coding	KNOWN
ENSMUSG00000007908	0.51	0.48	0.44	0.52	0.57	0.54	0.48	0.51	0.52	0.48	0.504	0.506	Hmgcll1	9	76014855	76136350	protein_coding	KNOWN
ENSMUSG00000007944	0.4	0.31	0.51	0.39	0.48	0.39	0.52	0.5	0.41	0.49	0.418	0.462	Ttc9b	7	27653915	27656208	protein_coding	KNOWN
ENSMUSG00000007950	0.5	0.51	0.51	0.52	0.52	0.49	0.51	0.52	0.49	0.51	0.512	0.504	Abhd8	8	71456700	71463657	protein_coding	KNOWN
ENSMUSG00000007987	0.53	0.5	0.51	0.68	0.54	0.55	0.52	0.52	0.53	0.49	0.552	0.522	Rabl5	5	136908150	136913244	protein_coding	KNOWN
ENSMUSG00000007989	0.45	0.5	0.57	0.27	0.48	0.5	0.53	0.5	0.51	0.5	0.454	0.508	Fzd3	14	65201026	65262463	protein_coding	KNOWN
ENSMUSG00000008036	0.52	0.5	0.52	0.5	0.52	0.51	0.51	0.5	0.51	0.51	0.512	0.508	Ap2s1	7	16738410	16749294	protein_coding	KNOWN
ENSMUSG00000008090	0.58	0.51	0.62	0.5	0.48	0.45	0.48	0.46	0.59	0.51	0.538	0.498	Fgfrl1	5	108694229	108706950	protein_coding	KNOWN
ENSMUSG00000008136	0.48	0.51	0.49	0.44	0.54	0.56	0.47	0.46	0.53	0.49	0.492	0.502	Fhl2	1	43123074	43163961	protein_coding	KNOWN
ENSMUSG00000008140	0.55	0.54	0.52	0.53	0.53	0.54	0.53	0.53	0.51	0.52	0.534	0.526	2310044H10Rik	7	44489937	44496529	protein_coding	KNOWN
ENSMUSG00000008153	0.49	0.45	0.49	0.47	0.47	0.49	0.47	0.5	0.5	0.48	0.474	0.488	Clstn3	6	124430759	124464794	protein_coding	KNOWN
ENSMUSG00000008206	0.45	0.49	0.48	0.52	0.51	0.5	0.47	0.48	0.47	0.45	0.49	0.474	Lass4	8	4493026	4525757	protein_coding	KNOWN
ENSMUSG00000008226	0.62	0.64	0.68	0.65	0.74	0.7	0.67	0.68	0.7	0.63	0.666	0.676	Scrn3	2	73312601	73337818	protein_coding	KNOWN
ENSMUSG00000008301	0.51	0.55	0.57	0.52	0.57	0.52	0.48	0.49	0.54	0.5	0.544	0.506	Phax	18	56562443	56587712	protein_coding	KNOWN
ENSMUSG00000008305	0.5	0.49	0.51	0.53	0.63	0.53	0.5	0.52	0.54	0.48	0.532	0.514	Tle1	4	72117142	72200919	protein_coding	KNOWN
ENSMUSG00000008318	0.55	0.38	0.55	0.5	0.53	0.56	0.61	0.52	0.57	0.52	0.502	0.556	Relt	7	100845848	100863446	protein_coding	KNOWN
ENSMUSG00000008333	0.45	0.46	0.47	0.51	0.48	0.51	0.46	0.48	0.51	0.42	0.474	0.476	Snrpb2	2	143063039	143072853	protein_coding	KNOWN
ENSMUSG00000008348	0.46	0.47	0.42	0.48	0.44	0.44	0.44	0.44	0.44	0.45	0.454	0.442	Ubc	5	125385965	125390202	protein_coding	KNOWN
ENSMUSG00000008373	0.51	0.52	0.42	0.52	0.46	0.51	0.51	0.49	0.48	0.5	0.486	0.498	Prpf31	7	3629985	3642486	protein_coding	KNOWN
ENSMUSG00000008384	0.44	0.49	0.48	0.53	0.56	0.55	0.54	0.54	0.57	0.49	0.5	0.538	Sertad1	7	27486910	27490316	protein_coding	KNOWN
ENSMUSG00000008393	0.57	0.55	0.59	0.6	0.49	0.6	0.57	0.57	0.56	0.6	0.56	0.58	Carhsp1	16	8658587	8672153	protein_coding	KNOWN
ENSMUSG00000008398	0.45	0.52	0.51	0.47	0.45	0.49	0.44	0.46	0.55	0.53	0.48	0.494	Elk3	10	93247414	93311135	protein_coding	KNOWN
ENSMUSG00000008429	0.51	0.5	0.48	0.51	0.58	0.46	0.49	0.5	0.5	0.51	0.516	0.492	Herpud2	9	25108130	25151781	protein_coding	KNOWN
ENSMUSG00000008435	0.52	0.51	0.42	0.48	0.5	0.48	0.54	0.53	0.48	0.53	0.486	0.512	Rdh13	7	4424770	4445649	protein_coding	KNOWN
ENSMUSG00000008450	0.45	0.54	0.45	0.54	0.63	0.54	0.53	0.55	0.59	0.45	0.522	0.532	Nutf2	8	105860634	105880402	protein_coding	KNOWN
ENSMUSG00000008475	0.52	0.53	0.52	0.54	0.56	0.54	0.51	0.52	0.54	0.53	0.534	0.528	Arpc5	1	152766542	152775597	protein_coding	KNOWN
ENSMUSG00000008496	0.51	0.55	0.42	0.49	0.58	0.56	0.47	0.53	0.41	0.56	0.51	0.506	Pou2f2	7	25091909	25132512	protein_coding	KNOWN
ENSMUSG00000008604	0.5	0.51	0.46	0.44	0.51	0.49	0.49	0.48	0.47	0.49	0.484	0.484	Ubqln4	3	88553716	88569725	protein_coding	KNOWN
ENSMUSG00000008658	0.46	0.45	0.49	0.46	0.47	0.45	0.47	0.47	0.46	0.47	0.466	0.464	Rbfox1	16	6809222	7412479	protein_coding	KNOWN
ENSMUSG00000008668	0.48	0.47	0.49	0.51	0.49	0.51	0.48	0.48	0.48	0.48	0.488	0.486	Rps18	17	33951999	33956001	protein_coding	KNOWN
ENSMUSG00000008682	0.47	0.52	0.48	0.56	0.57	0.58	0.53	0.65	0.52	0.53	0.52	0.562	Rpl10	X	74270812	74273135	protein_coding	KNOWN
ENSMUSG00000008683	0.7	0.73	0.67	0.63	0.66	0.69	0.71	0.7	0.69	0.75	0.678	0.708	Rps15a	7	118104378	118116186	protein_coding	KNOWN
ENSMUSG00000008730	0.46	0.47	0.47	0.45	0.47	0.47	0.46	0.45	0.45	0.46	0.464	0.458	Hipk1	3	103739815	103791563	protein_coding	KNOWN
ENSMUSG00000008734	0.48	0.49	0.49	0.48	0.49	0.48	0.49	0.48	0.48	0.49	0.486	0.484	Gprc5b	7	118972040	118995211	protein_coding	KNOWN
ENSMUSG00000008763	0.55	0.53	0.53	0.5	0.53	0.55	0.54	0.53	0.54	0.54	0.528	0.54	Man1a2	3	100562208	100685503	protein_coding	KNOWN
ENSMUSG00000008855	0.51	0.48	0.5	0.51	0.47	0.48	0.5	0.51	0.51	0.49	0.494	0.498	Hdac5	11	102194432	102230166	protein_coding	KNOWN
ENSMUSG00000008859	0.44	0.49	0.46	0.46	0.46	0.44	0.44	0.48	0.46	0.45	0.462	0.454	Rala	13	17880575	17944239	protein_coding	KNOWN
ENSMUSG00000008892	0.49	0.5	0.53	0.54	0.5	0.52	0.5	0.48	0.49	0.5	0.512	0.498	Vdac3	8	22577075	22593813	protein_coding	KNOWN
ENSMUSG00000008958	0.53	0.46	0.5	0.49	0.49	0.5	0.53	0.48	0.57	0.54	0.494	0.524	Vps72	3	95111022	95123051	protein_coding	KNOWN
ENSMUSG00000008976	0.44	0.52	0.5	0.49	0.48	0.48	0.44	0.46	0.51	0.48	0.486	0.474	Gabpa	16	84834925	84863779	protein_coding	KNOWN
ENSMUSG00000008999	0.45	0.46	0.45	0.44	0.5	0.47	0.47	0.47	0.46	0.45	0.46	0.464	Bmp7	2	172868012	172940321	protein_coding	KNOWN
ENSMUSG00000009013	0.61	0.56	0.62	0.62	0.59	0.61	0.61	0.61	0.62	0.63	0.6	0.616	Dynll1	5	115297110	115300999	protein_coding	KNOWN
ENSMUSG00000009030	0.54	0.52	0.52	0.56	0.53	0.57	0.56	0.52	0.52	0.52	0.534	0.538	Pdcl	2	37350074	37359332	protein_coding	KNOWN
ENSMUSG00000009035	0.55	0.55	0.52	0.53	0.49	0.53	0.55	0.52	0.56	0.53	0.528	0.538	Tmem184b	15	79360684	79403303	protein_coding	KNOWN
ENSMUSG00000009070	0.41	0.66	0.64	0.78	0.55	0.64	0.5	0.46	0.49	0.43	0.608	0.504	Rtdr1	10	74957477	75032586	protein_coding	KNOWN
ENSMUSG00000009073	0.51	0.5	0.53	0.48	0.5	0.48	0.47	0.5	0.49	0.5	0.504	0.488	Nf2	11	4765845	4849536	protein_coding	KNOWN
ENSMUSG00000009075	0.58	0.44	0.55	0.62	0.6	0.66	0.59	0.55	0.53	0.59	0.558	0.584	Cabp7	11	4736892	4746778	protein_coding	KNOWN
ENSMUSG00000009079	0.51	0.52	0.51	0.48	0.51	0.51	0.52	0.52	0.52	0.53	0.506	0.52	Ewsr1	11	5069689	5099266	protein_coding	KNOWN
ENSMUSG00000009090	0.47	0.51	0.48	0.51	0.49	0.48	0.49	0.49	0.49	0.52	0.492	0.494	Ap1b1	11	4986824	5042791	protein_coding	KNOWN
ENSMUSG00000009092	0.37	0.48	0.44	0.69	0.66	0.51	0.5	0.46	0.67	0.47	0.528	0.522	Derl3	10	75893398	75895941	protein_coding	KNOWN
ENSMUSG00000009112	0.51	0.51	0.5	0.49	0.49	0.48	0.49	0.49	0.48	0.47	0.5	0.482	Bcl2l13	6	120836230	120892842	protein_coding	KNOWN
ENSMUSG00000009207	0.52	0.56	0.44	0.58	0.57	0.54	0.53	0.54	0.5	0.55	0.534	0.532	Lnp	2	74520291	74579435	protein_coding	KNOWN
ENSMUSG00000009216	0.58	0.55	0.57	0.59	0.56	0.59	0.57	0.58	0.57	0.57	0.57	0.576	Fam163b	2	27110380	27142491	protein_coding	KNOWN
ENSMUSG00000009291	0.48	0.48	0.5	0.5	0.5	0.5	0.49	0.5	0.5	0.5	0.492	0.498	Pttg1ip	10	77581720	77598732	protein_coding	KNOWN
ENSMUSG00000009292	0.45	0.41	0.47	0.44	0.49	0.4	0.43	0.42	0.42	0.44	0.452	0.422	Trpm2	10	77907722	77970563	protein_coding	KNOWN
ENSMUSG00000009293	0.47	0.46	0.51	0.51	0.53	0.51	0.42	0.52	0.5	0.51	0.496	0.492	Ube2g2	10	77622275	77645993	protein_coding	KNOWN
ENSMUSG00000009376	0.56	0.57	0.57	0.58	0.49	0.63	0.54	0.59	0.61	0.61	0.554	0.596	Met	6	17463800	17573980	protein_coding	KNOWN
ENSMUSG00000009378	0.5	0.64	0.45	0.45	0.45	0.49	0.49	0.52	0.59	0.47	0.498	0.512	Slc16a12	19	34668403	34747289	protein_coding	KNOWN
ENSMUSG00000009394	0.51	0.5	0.49	0.48	0.51	0.5	0.5	0.49	0.5	0.5	0.498	0.498	Syn2	6	115134902	115282626	protein_coding	KNOWN
ENSMUSG00000009406	0.17	0.25	0.23	0.23	0.31	0.39	0.38	0.55	0.28	0.3	0.238	0.38	Elk1	X	20933395	20950608	protein_coding	KNOWN
ENSMUSG00000009535	0.46	0.45	0.5	0.52	0.53	0.5	0.5	0.51	0.49	0.48	0.492	0.496	Rnmt	18	68300355	68324852	protein_coding	KNOWN
ENSMUSG00000009545	0.69	0.33	0.4	0.42	0.43	0.67	0.56	0.88	0.74	0.67	0.454	0.704	Kcnq1	7	143107254	143427042	protein_coding	KNOWN
ENSMUSG00000009549	0.41	0.49	0.44	0.44	0.43	0.48	0.45	0.47	0.46	0.46	0.442	0.464	Srp14	2	118475850	118479711	protein_coding	KNOWN
ENSMUSG00000009551	0.48	0.72	0.75	0.57	0.76	0.47	0.5	0.48	0.41	0.4	0.656	0.452	6330409D20Rik	2	32732620	32741016	protein_coding	NOVEL
ENSMUSG00000009555	0.54	0.58	0.36	0.51	0.53	0.53	0.46	0.5	0.51	0.48	0.504	0.496	Cdk9	2	32705784	32713076	protein_coding	KNOWN
ENSMUSG00000009563	0.63	0.72	0.65	0.67	0.72	0.66	0.63	0.6	0.61	0.71	0.678	0.642	Tor2a	2	32757234	32762244	protein_coding	KNOWN
ENSMUSG00000009569	0.46	0.47	0.49	0.46	0.45	0.46	0.46	0.48	0.46	0.47	0.466	0.466	Mkl2	16	13256481	13417529	protein_coding	KNOWN
ENSMUSG00000009575	0.5	0.5	0.51	0.5	0.46	0.5	0.49	0.49	0.5	0.49	0.494	0.494	Cbx5	15	103191544	103239816	protein_coding	KNOWN
ENSMUSG00000009585	0.46	0.37	0.59	0.61	0.55	0.45	0.43	0.28	0.33	0.47	0.516	0.392	Apobec3	15	79891659	79915906	protein_coding	KNOWN
ENSMUSG00000009614	0.61	0.6	0.63	0.54	0.62	0.58	0.57	0.58	0.6	0.58	0.6	0.582	Sardh	2	27188393	27248337	protein_coding	KNOWN
ENSMUSG00000009621	0.46	0.47	0.45	0.54	0.49	0.53	0.49	0.5	0.46	0.51	0.482	0.498	Vav2	2	27262104	27427033	protein_coding	KNOWN
ENSMUSG00000009628	0.48	0.38	0.44	0.49	0.53	0.43	0.49	0.52	0.5	0.47	0.464	0.482	Tex15	8	33516738	33585582	protein_coding	KNOWN
ENSMUSG00000009630	0.55	0.48	0.54	0.52	0.49	0.53	0.52	0.51	0.52	0.51	0.516	0.518	Ppp2cb	8	33599621	33619794	protein_coding	KNOWN
ENSMUSG00000009633	0.51	0.56	0.38	0.51	0.34	0.51	0.52	0.53	0.47	0.4	0.46	0.486	G0s2	1	193272161	193273188	protein_coding	KNOWN
ENSMUSG00000009640	0.38	0.62	0.48	0.52	0.53	0.32	0.47	0.67	0.55	0.47	0.506	0.496	Dmap1	4	117674681	117682273	protein_coding	KNOWN
ENSMUSG00000009647	0.53	0.53	0.5	0.53	0.51	0.51	0.54	0.52	0.51	0.51	0.52	0.518	Ccdc109a	10	59446984	59616692	protein_coding	KNOWN
ENSMUSG00000009681	0.51	0.49	0.53	0.52	0.53	0.48	0.52	0.51	0.51	0.5	0.516	0.504	Bcr	10	75060896	75184923	protein_coding	KNOWN
ENSMUSG00000009687	0.5	0.43	0.46	0.52	0.49	0.46	0.53	0.53	0.46	0.5	0.48	0.496	Fxyd5	7	31032722	31042481	protein_coding	KNOWN
ENSMUSG00000009731	0.16	0.23	0.31	0.2	0.29	0.38	0.32	0.48	0.27	0.3	0.238	0.35	Kcnd1	X	7822289	7838280	protein_coding	KNOWN
ENSMUSG00000009733	0.47	0.42	0.48	0.44	0.47	0.47	0.47	0.41	0.47	0.45	0.456	0.454	Tfcp2	15	100502799	100552008	protein_coding	KNOWN
ENSMUSG00000009741	0.54	0.55	0.54	0.55	0.58	0.56	0.53	0.54	0.5	0.56	0.552	0.538	Ubp1	9	113930934	113977199	protein_coding	KNOWN
ENSMUSG00000009828	0.55	0.51	0.52	0.51	0.54	0.53	0.54	0.53	0.54	0.55	0.526	0.538	Ick	9	78109192	78172107	protein_coding	KNOWN
ENSMUSG00000009863	0.52	0.46	0.46	0.49	0.5	0.48	0.47	0.48	0.47	0.5	0.486	0.48	Sdhb	4	140961203	140979193	protein_coding	KNOWN
ENSMUSG00000009905	0.52	0.5	0.51	0.53	0.45	0.5	0.5	0.48	0.5	0.49	0.502	0.494	Kdsr	1	106720410	106759742	protein_coding	KNOWN
ENSMUSG00000009907	0.49	0.5	0.44	0.51	0.52	0.49	0.52	0.51	0.5	0.52	0.492	0.508	Vps4b	1	106764071	106796728	protein_coding	KNOWN
ENSMUSG00000009995	0.23	0.37	0.33	0.26	0.34	0.37	0.46	0.53	0.33	0.35	0.306	0.408	Taz	X	74281912	74290151	protein_coding	KNOWN
ENSMUSG00000010025	0.53	0.48	0.5	0.53	0.48	0.5	0.51	0.51	0.49	0.51	0.504	0.504	Aldh3a2	11	61223417	61267464	protein_coding	KNOWN
ENSMUSG00000010044	0.5	0.64	0.67	0.3	0.56	0.38	0.19	0.47	0.52	0.63	0.534	0.438	Zmynd10	9	107547310	107551319	protein_coding	KNOWN
ENSMUSG00000010045	0.45	0.43	0.59	0.54	0.48	0.47	0.43	0.56	0.53	0.48	0.498	0.494	Tmem115	9	107533945	107538656	protein_coding	KNOWN
ENSMUSG00000010047	0.55	0.63	0.59	0.55	0.57	0.49	0.53	0.53	0.56	0.51	0.578	0.524	Hyal2	9	107569117	107572776	protein_coding	KNOWN
ENSMUSG00000010048	0.39	0.46	0.55	0.4	0.38	0.53	0.48	0.48	0.48	0.48	0.436	0.49	Ifrd2	9	107587718	107593038	protein_coding	KNOWN
ENSMUSG00000010051	0.38	0.47	0.65	0.43	0.58	0.49	0.51	0.51	0.47	0.5	0.502	0.496	Hyal1	9	107576927	107581710	protein_coding	KNOWN
ENSMUSG00000010054	0.47	0.5	0.58	0.5	0.48	0.46	0.5	0.5	0.48	0.49	0.506	0.486	Tusc2	9	107563255	107566108	protein_coding	KNOWN
ENSMUSG00000010057	0.54	0.54	0.53	0.54	0.55	0.6	0.56	0.55	0.56	0.56	0.54	0.566	Nprl2	9	107542209	107545704	protein_coding	KNOWN
ENSMUSG00000010064	0.51	0.51	0.51	0.48	0.48	0.5	0.51	0.51	0.53	0.5	0.498	0.51	Slc38a3	9	107650639	107668968	protein_coding	KNOWN
ENSMUSG00000010067	0.55	0.46	0.48	0.51	0.57	0.47	0.54	0.48	0.48	0.46	0.514	0.486	Rassf1	9	107551555	107562263	protein_coding	KNOWN
ENSMUSG00000010080	0.55	0.79	0.28	0.51	0.53	0.29	0.86	0.63	0.38	0.47	0.532	0.526	Epn3	11	94489599	94499974	protein_coding	KNOWN
ENSMUSG00000010086	0.48	0.48	0.5	0.51	0.48	0.49	0.47	0.48	0.54	0.5	0.49	0.496	Rnf112	11	61448442	61454131	protein_coding	KNOWN
ENSMUSG00000010095	0.49	0.51	0.49	0.47	0.49	0.51	0.49	0.49	0.48	0.5	0.49	0.494	Slc3a2	19	8706882	8723369	protein_coding	KNOWN
ENSMUSG00000010097	0.47	0.52	0.54	0.52	0.53	0.55	0.48	0.5	0.48	0.5	0.516	0.502	Nxf1	19	8757103	8770909	protein_coding	KNOWN
ENSMUSG00000010110	0.51	0.52	0.54	0.51	0.52	0.49	0.56	0.47	0.49	0.53	0.52	0.508	Stx5a	19	8741413	8756069	protein_coding	KNOWN
ENSMUSG00000010142	0.66	0.44	0.71	0.57	0.46	0.63	0.61	0.73	0.6	0.68	0.568	0.65	Tnfrsf13b	11	61126755	61149372	protein_coding	KNOWN
ENSMUSG00000010154	0.54	0.55	0.48	0.47	0.46	0.46	0.51	0.54	0.52	0.53	0.5	0.512	Spire2	8	123332713	123369515	protein_coding	KNOWN
ENSMUSG00000010175	0.5	0.53	0.47	0.45	0.45	0.49	0.51	0.51	0.5	0.54	0.48	0.51	Prox1	1	190118038	190170680	protein_coding	KNOWN
ENSMUSG00000010205	0.48	0.52	0.49	0.54	0.6	0.54	0.53	0.5	0.49	0.52	0.526	0.516	Raver1	9	21074168	21091988	protein_coding	KNOWN
ENSMUSG00000010277	0.52	0.52	0.52	0.5	0.51	0.52	0.51	0.52	0.52	0.5	0.514	0.514	2610507B11Rik	11	78261752	78290623	protein_coding	KNOWN
ENSMUSG00000010290	0.56	0.54	0.55	0.49	0.56	0.5	0.56	0.57	0.49	0.56	0.54	0.536	AI597479	1	43098710	43115947	protein_coding	KNOWN
ENSMUSG00000010307	0.51	0.49	0.54	0.51	0.57	0.55	0.48	0.5	0.52	0.54	0.524	0.518	Tmem86a	7	47050640	47054776	protein_coding	KNOWN
ENSMUSG00000010362	0.53	0.42	0.48	0.55	0.48	0.56	0.54	0.53	0.48	0.44	0.492	0.51	Rdm1	11	101627195	101636100	protein_coding	KNOWN
ENSMUSG00000010392	0.46	0.48	0.48	0.46	0.43	0.5	0.47	0.48	0.5	0.5	0.462	0.49	Gosr1	11	76726602	76763579	protein_coding	KNOWN
ENSMUSG00000010406	0.63	0.62	0.66	0.53	0.53	0.56	0.57	0.58	0.55	0.6	0.594	0.572	Mrpl52	14	54426909	54429750	protein_coding	KNOWN
ENSMUSG00000010453	0.53	0.52	0.53	0.52	0.53	0.54	0.54	0.51	0.54	0.52	0.526	0.53	Kansl3	1	36335730	36369181	protein_coding	KNOWN
ENSMUSG00000010461	0.49	0.39	0.42	0.55	0.57	0.62	0.54	0.49	0.55	0.45	0.484	0.53	Eya4	10	23104168	23349895	protein_coding	KNOWN
ENSMUSG00000010492	0.44	0.29	0.61	0.47	0.48	0.44	0.29	0.51	0.42	0.57	0.458	0.446	Gm16119	2	181578480	181585170	antisense	NOVEL
ENSMUSG00000010517	0.48	0.53	0.58	0.5	0.49	0.48	0.48	0.5	0.49	0.5	0.516	0.49	Faf1	4	109676588	109963960	protein_coding	KNOWN
ENSMUSG00000010554	0.44	0.45	0.43	0.48	0.41	0.45	0.48	0.41	0.47	0.47	0.442	0.456	Mettl16	11	74770830	74828525	protein_coding	KNOWN
ENSMUSG00000010592	0.43	0.6	0.63	0.56	0.62	0.7	0.5	0.7	0.47	0.48	0.568	0.57	Dazl	17	50279394	50293599	protein_coding	KNOWN
ENSMUSG00000010607	0.51	0.52	0.44	0.52	0.48	0.46	0.54	0.44	0.49	0.47	0.494	0.48	Pigyl	9	22156846	22158358	protein_coding	KNOWN
ENSMUSG00000010608	0.48	0.49	0.52	0.48	0.51	0.47	0.5	0.5	0.5	0.5	0.496	0.494	Rbm25	12	83632234	83683123	protein_coding	KNOWN
ENSMUSG00000010609	0.61	0.48	0.63	0.53	0.61	0.58	0.56	0.59	0.59	0.58	0.572	0.58	Psen2	1	180227004	180263438	protein_coding	KNOWN
ENSMUSG00000010660	0.54	0.33	0.5	0.39	0.5	0.6	0.61	0.58	0.5	0.62	0.452	0.582	Plcd1	9	119071527	119093496	protein_coding	KNOWN
ENSMUSG00000010663	0.47	0.47	0.46	0.51	0.47	0.47	0.49	0.47	0.48	0.49	0.476	0.48	Fads1	19	10182888	10196870	protein_coding	KNOWN
ENSMUSG00000010721	0.59	0.59	0.62	0.52	0.52	0.59	0.57	0.57	0.57	0.6	0.568	0.58	Lmbr1	5	29229814	29378390	protein_coding	KNOWN
ENSMUSG00000010755	0.51	0.46	0.55	0.49	0.5	0.51	0.47	0.56	0.46	0.5	0.502	0.5	Cars	7	143557230	143600090	protein_coding	KNOWN
ENSMUSG00000010803	0.5	0.51	0.51	0.51	0.48	0.52	0.5	0.51	0.51	0.51	0.502	0.51	Gabra1	11	42130939	42182930	protein_coding	KNOWN
ENSMUSG00000010825	0.57	0.63	0.48	0.58	0.6	0.61	0.58	0.55	0.68	0.61	0.572	0.606	Grid2ip	5	143357338	143392152	protein_coding	KNOWN
ENSMUSG00000010830	1	0.5	0.43	0.71	0.7	0.5	0.78	0.61	0.42	0.54	0.668	0.57	Kdelr3	15	79516408	79527739	protein_coding	KNOWN
ENSMUSG00000010914	0.48	0.51	0.45	0.5	0.54	0.48	0.52	0.51	0.49	0.45	0.496	0.49	Pdhx	2	103021075	103073513	protein_coding	KNOWN
ENSMUSG00000010936	0.51	0.52	0.36	0.43	0.45	0.49	0.46	0.49	0.46	0.4	0.454	0.46	Vac14	8	110618638	110720396	protein_coding	KNOWN
ENSMUSG00000011096	0.51	0.48	0.47	0.49	0.5	0.49	0.51	0.52	0.51	0.5	0.49	0.506	Akt1s1	7	44848991	44855421	protein_coding	KNOWN
ENSMUSG00000011114	0.52	0.49	0.43	0.5	0.49	0.48	0.49	0.48	0.48	0.43	0.486	0.472	Tbrg1	9	37649182	37657312	protein_coding	KNOWN
ENSMUSG00000011148	0.57	0.61	0.57	0.56	0.5	0.6	0.58	0.56	0.54	0.53	0.562	0.562	Adssl1	12	112620045	112641354	protein_coding	KNOWN
ENSMUSG00000011158	0.5	0.53	0.53	0.55	0.57	0.55	0.51	0.49	0.46	0.52	0.536	0.506	Brf1	12	112959862	113000621	protein_coding	KNOWN
ENSMUSG00000011171	0.53	0.46	0.53	0.55	0.51	0.53	0.51	0.52	0.54	0.53	0.516	0.526	Vipr2	12	116077726	116146261	protein_coding	KNOWN
ENSMUSG00000011179	0.51	0.49	0.53	0.51	0.43	0.5	0.51	0.51	0.52	0.5	0.494	0.508	Odc1	12	17544873	17551502	protein_coding	KNOWN
ENSMUSG00000011256	0.31	0.31	0.37	0.37	0.42	0.36	0.36	0.39	0.31	0.36	0.356	0.356	Adam19	11	46055992	46147343	protein_coding	KNOWN
ENSMUSG00000011306	0.46	0.53	0.47	0.47	0.57	0.49	0.48	0.53	0.57	0.51	0.5	0.516	Sugp1	8	70042813	70071953	protein_coding	KNOWN
ENSMUSG00000011382	0.71	0.69	0.63	0.68	0.64	0.68	0.72	0.69	0.66	0.69	0.67	0.688	Dhdh	7	45472956	45488805	protein_coding	KNOWN
ENSMUSG00000011427	0.55	0.54	0.54	0.53	0.5	0.53	0.51	0.54	0.51	0.54	0.532	0.526	Zfp790	7	29816072	29832042	protein_coding	KNOWN
ENSMUSG00000011589	0.59	0.59	0.47	0.5	0.55	0.5	0.6	0.49	0.5	0.51	0.54	0.52	Fsd1	17	55986511	55996881	protein_coding	KNOWN
ENSMUSG00000011658	0.48	0.44	0.45	0.4	0.53	0.49	0.47	0.47	0.46	0.46	0.46	0.47	Fuz	7	44896079	44902631	protein_coding	KNOWN
ENSMUSG00000011751	0.51	0.51	0.53	0.56	0.52	0.51	0.53	0.52	0.53	0.53	0.526	0.524	Spnb4	7	27356383	27447686	protein_coding	KNOWN
ENSMUSG00000011752	0.48	0.46	0.48	0.46	0.48	0.46	0.47	0.47	0.48	0.47	0.472	0.47	Pgam1	19	41911871	41918664	protein_coding	KNOWN
ENSMUSG00000011831	0.49	0.49	0.47	0.49	0.49	0.47	0.48	0.48	0.47	0.48	0.486	0.476	Evi5	5	107744795	107875107	protein_coding	KNOWN
ENSMUSG00000011832	0.53	0.5	0.49	0.47	0.59	0.51	0.52	0.51	0.52	0.51	0.516	0.514	Evi5l	8	4166567	4211257	protein_coding	KNOWN
ENSMUSG00000011837	0.46	0.51	0.47	0.51	0.65	0.48	0.54	0.51	0.5	0.53	0.52	0.512	Snapc2	8	4253102	4256219	protein_coding	KNOWN
ENSMUSG00000011877	0.5	0.54	0.54	0.5	0.5	0.52	0.5	0.52	0.5	0.52	0.516	0.512	Git1	11	77493562	77507786	protein_coding	KNOWN
ENSMUSG00000011884	0.6	0.56	0.55	0.58	0.54	0.6	0.61	0.6	0.63	0.6	0.566	0.608	Gltp	5	114669403	114690984	protein_coding	KNOWN
ENSMUSG00000011960	0.53	0.51	0.49	0.53	0.52	0.53	0.53	0.5	0.51	0.53	0.516	0.52	Ccnt1	15	98538689	98570923	protein_coding	KNOWN
ENSMUSG00000012017	0.47	0.5	0.47	0.4	0.61	0.49	0.43	0.45	0.46	0.46	0.49	0.458	Scarf2	16	17797282	17808287	protein_coding	KNOWN
ENSMUSG00000012076	0.54	0.63	0.6	0.59	0.56	0.54	0.56	0.58	0.55	0.56	0.584	0.558	Brms1l	12	55836366	55869735	protein_coding	KNOWN
ENSMUSG00000012117	0.44	0.45	0.49	0.5	0.48	0.45	0.46	0.47	0.45	0.46	0.472	0.458	Dhdds	4	133969028	134000918	protein_coding	KNOWN
ENSMUSG00000012126	0.54	0.49	0.55	0.47	0.46	0.36	0.39	0.44	0.45	0.36	0.502	0.4	Ubxn11	4	134102570	134127593	protein_coding	KNOWN
ENSMUSG00000012296	0.5	0.52	0.45	0.46	0.5	0.51	0.52	0.5	0.49	0.51	0.486	0.506	Tjap1	17	46257851	46283026	protein_coding	KNOWN
ENSMUSG00000012405	0.33	0.33	0.32	0.34	0.29	0.33	0.36	0.33	0.36	0.34	0.322	0.344	Rpl15	14	18267823	18271391	protein_coding	KNOWN
ENSMUSG00000012422	0.48	0.52	0.5	0.53	0.47	0.48	0.5	0.49	0.5	0.47	0.5	0.488	Tmem167	13	90089123	90143907	protein_coding	KNOWN
ENSMUSG00000012428	0.49	0.29	0.43	0.25	0.41	0.56	0.45	0.41	0.82	0.31	0.374	0.51	Steap4	5	7960472	7982213	protein_coding	KNOWN
ENSMUSG00000012429	0.52	0.41	0.56	0.53	0.55	0.48	0.54	0.52	0.56	0.49	0.514	0.518	2810021B07Rik	13	17695413	17699105	protein_coding	KNOWN
ENSMUSG00000012443	0.61	0.45	0.64	0.74	0.73	0.56	0.61	0.6	0.5	0.55	0.634	0.564	Kif11	19	37376403	37421859	protein_coding	KNOWN
ENSMUSG00000012483	0.42	0.32	0.5	0.49	0.47	0.4	0.4	0.51	0.39	0.46	0.44	0.432	Rpa3	6	8255936	8259173	protein_coding	KNOWN
ENSMUSG00000012609	0.49	0.56	0.45	0.55	0.64	0.51	0.38	0.45	0.45	0.48	0.538	0.454	Ttll5	12	85824659	86061893	protein_coding	KNOWN
ENSMUSG00000012640	0.51	0.5	0.51	0.53	0.46	0.49	0.46	0.46	0.5	0.48	0.502	0.478	Zfp715	7	43296197	43313294	protein_coding	KNOWN
ENSMUSG00000012819	0.47	0.47	0.48	0.46	0.46	0.4	0.43	0.49	0.42	0.43	0.468	0.434	Cdh23	10	60302748	60696490	protein_coding	KNOWN
ENSMUSG00000012848	0.49	0.52	0.51	0.48	0.42	0.6	0.52	0.57	0.49	0.53	0.484	0.542	Rps5	7	12922290	12926686	protein_coding	KNOWN
ENSMUSG00000013033	0.52	0.52	0.52	0.5	0.51	0.51	0.53	0.53	0.51	0.53	0.514	0.522	Lphn1	8	83900105	83941954	protein_coding	KNOWN
ENSMUSG00000013150	0.59	0.51	0.49	0.57	0.53	0.58	0.62	0.59	0.55	0.55	0.538	0.578	Gfod2	8	105713854	105758664	protein_coding	KNOWN
ENSMUSG00000013155	0.46	0.3	0.3	0.44	0.3	0.87	0.36	0.62	0.47	0.42	0.36	0.548	E130303B06Rik	8	105703655	105707933	protein_coding	KNOWN
ENSMUSG00000013160	0.49	0.5	0.51	0.52	0.51	0.48	0.49	0.5	0.47	0.5	0.506	0.488	Atp6v0d1	8	105524465	105566047	protein_coding	KNOWN
ENSMUSG00000013236	0.47	0.46	0.48	0.48	0.5	0.47	0.48	0.48	0.47	0.48	0.478	0.476	Ptprs	17	56412431	56476483	protein_coding	KNOWN
ENSMUSG00000013275	0.48	0.52	0.47	0.44	0.44	0.46	0.47	0.49	0.49	0.5	0.47	0.482	Slc41a1	1	131827493	131848865	protein_coding	KNOWN
ENSMUSG00000013367	0.52	0.53	0.55	0.49	0.52	0.52	0.56	0.54	0.51	0.52	0.522	0.53	Iglon5	7	43472907	43490075	protein_coding	KNOWN
ENSMUSG00000013419	0.5	0.49	0.49	0.51	0.51	0.49	0.48	0.48	0.5	0.48	0.5	0.486	Zfp651	9	121760033	121771742	protein_coding	KNOWN
ENSMUSG00000013465	0.44	0.43	0.42	0.46	0.47	0.45	0.43	0.46	0.46	0.48	0.444	0.456	Cobra1	2	25199712	25211489	protein_coding	KNOWN
ENSMUSG00000013495	0.5	0.51	0.56	0.53	0.52	0.47	0.52	0.44	0.46	0.55	0.524	0.488	Tmem175	5	108629770	108647770	protein_coding	KNOWN
ENSMUSG00000013539	0.49	0.49	0.5	0.48	0.46	0.49	0.5	0.48	0.52	0.5	0.484	0.498	D16H22S680E	16	18300825	18348103	protein_coding	NOVEL
ENSMUSG00000013584	0.63	0.56	0.47	0.5	0.52	0.54	0.59	0.61	0.57	0.57	0.536	0.576	Aldh1a2	9	71215789	71296243	protein_coding	KNOWN
ENSMUSG00000013622	0.61	0.59	0.78	0.63	0.6	0.62	0.67	0.56	0.57	0.57	0.642	0.598	0610007C21Rik	5	31048312	31054633	protein_coding	KNOWN
ENSMUSG00000013629	0.48	0.54	0.53	0.57	0.44	0.5	0.53	0.58	0.54	0.51	0.512	0.532	Cad	5	31054780	31078479	protein_coding	KNOWN
ENSMUSG00000013662	0.51	0.53	0.5	0.52	0.53	0.51	0.5	0.5	0.5	0.51	0.518	0.504	Atad1	19	32672563	32712298	protein_coding	KNOWN
ENSMUSG00000013663	0.49	0.5	0.51	0.48	0.49	0.5	0.49	0.5	0.49	0.49	0.494	0.494	Pten	19	32757497	32826160	protein_coding	KNOWN
ENSMUSG00000013698	0.5	0.5	0.5	0.48	0.47	0.5	0.51	0.5	0.49	0.5	0.49	0.5	Pea15a	1	172196728	172206804	protein_coding	KNOWN
ENSMUSG00000013707	0.55	0.59	0.64	0.55	0.43	0.53	0.3	0.48	0.56	0.58	0.552	0.49	Tnfaip8l2	3	95139521	95142360	protein_coding	KNOWN
ENSMUSG00000013736	0.59	0.54	0.51	0.61	0.56	0.55	0.55	0.53	0.56	0.55	0.562	0.548	Trnt1	6	106769120	106782474	protein_coding	KNOWN
ENSMUSG00000013766	0.46	0.51	0.41	0.46	0.38	0.47	0.47	0.44	0.42	0.42	0.444	0.444	Ly6g6e	17	35076902	35078804	protein_coding	KNOWN
ENSMUSG00000013787	0.51	0.53	0.47	0.48	0.52	0.46	0.49	0.5	0.51	0.51	0.502	0.494	Ehmt2	17	34898469	34914052	protein_coding	KNOWN
ENSMUSG00000013833	0.49	0.49	0.48	0.48	0.47	0.48	0.49	0.48	0.48	0.48	0.482	0.482	Med16	10	79894708	79908923	protein_coding	KNOWN
ENSMUSG00000013846	0.6	0.65	0.59	0.55	0.6	0.62	0.63	0.62	0.61	0.63	0.598	0.622	St3gal1	15	67102875	67113992	protein_coding	KNOWN
ENSMUSG00000013858	0.52	0.49	0.46	0.52	0.5	0.53	0.52	0.51	0.53	0.52	0.498	0.522	ORF61	10	79974948	79984330	protein_coding	KNOWN
ENSMUSG00000013878	0.49	0.46	0.5	0.51	0.53	0.46	0.49	0.5	0.48	0.5	0.498	0.486	Rnf170	8	26119368	26143871	protein_coding	KNOWN
ENSMUSG00000013921	0.52	0.52	0.51	0.52	0.51	0.51	0.53	0.52	0.51	0.52	0.516	0.518	Clip3	7	30291672	30308367	protein_coding	KNOWN
ENSMUSG00000013973	0.45	0.51	0.55	0.56	0.48	0.52	0.54	0.51	0.48	0.56	0.51	0.522	Dedd	1	171329145	171342331	protein_coding	KNOWN
ENSMUSG00000013997	0.51	0.57	0.57	0.45	0.56	0.53	0.55	0.56	0.54	0.52	0.532	0.54	Nit1	1	171338008	171345646	protein_coding	KNOWN
ENSMUSG00000014039	0.46	0.41	0.52	0.51	0.54	0.45	0.42	0.53	0.46	0.41	0.488	0.454	Prdm15	16	97791467	97851850	protein_coding	KNOWN
ENSMUSG00000014074	0.42	0.44	0.5	0.47	0.45	0.53	0.5	0.47	0.48	0.54	0.456	0.504	Rnf168	16	32277459	32301434	protein_coding	KNOWN
ENSMUSG00000014075	0.58	0.56	0.59	0.58	0.52	0.49	0.62	0.6	0.64	0.54	0.566	0.578	Tctex1d2	16	32419702	32429099	protein_coding	KNOWN
ENSMUSG00000014077	0.51	0.52	0.49	0.52	0.51	0.5	0.5	0.51	0.52	0.51	0.51	0.508	1500003O03Rik	2	119547697	119587027	protein_coding	KNOWN
ENSMUSG00000014164	0.58	0.52	0.53	0.5	0.57	0.53	0.55	0.53	0.57	0.58	0.54	0.552	Klhl3	13	58004221	58113592	protein_coding	KNOWN
ENSMUSG00000014177	0.47	0.5	0.5	0.47	0.45	0.46	0.47	0.46	0.44	0.46	0.478	0.458	Fam18b	11	62879455	62916780	protein_coding	KNOWN
ENSMUSG00000014195	0.52	0.53	0.47	0.52	0.59	0.54	0.55	0.54	0.57	0.56	0.526	0.552	Dnajc7	11	100582818	100620168	protein_coding	KNOWN
ENSMUSG00000014198	0.31	0.38	0.39	0.36	0.37	0.35	0.34	0.35	0.33	0.3	0.362	0.334	Zfp385c	11	100627543	100692455	protein_coding	KNOWN
ENSMUSG00000014226	0.47	0.45	0.43	0.43	0.53	0.49	0.44	0.49	0.51	0.41	0.462	0.468	Cacybp	1	160202367	160212892	protein_coding	KNOWN
ENSMUSG00000014232	0.55	0.55	0.55	0.55	0.57	0.52	0.53	0.53	0.46	0.58	0.554	0.524	Cluap1	16	3908801	3941147	protein_coding	KNOWN
ENSMUSG00000014243	0.44	0.53	0.52	0.39	0.61	0.48	0.39	0.43	0.42	0.59	0.498	0.462	Zswim7	11	62267224	62281375	protein_coding	KNOWN
ENSMUSG00000014245	0.6	0.59	0.44	0.59	0.53	0.55	0.59	0.54	0.53	0.52	0.55	0.546	Pigl	11	62458285	62516293	protein_coding	KNOWN
ENSMUSG00000014313	0.54	0.52	0.52	0.54	0.53	0.52	0.54	0.5	0.55	0.54	0.53	0.53	Cox6c	15	35925886	35938246	protein_coding	KNOWN
ENSMUSG00000014329	0.53	0.46	0.37	0.49	0.46	0.42	0.45	0.45	0.38	0.44	0.462	0.428	Bicc1	10	70922832	71159700	protein_coding	KNOWN
ENSMUSG00000014349	0.52	0.53	0.51	0.52	0.49	0.51	0.51	0.5	0.52	0.53	0.514	0.514	Ube2z	11	96047432	96065388	protein_coding	KNOWN
ENSMUSG00000014353	0.51	0.48	0.48	0.47	0.5	0.51	0.51	0.48	0.51	0.51	0.488	0.504	Tmem87b	2	128818118	128854261	protein_coding	KNOWN
ENSMUSG00000014355	0.56	0.56	0.55	0.52	0.55	0.52	0.55	0.53	0.53	0.54	0.548	0.534	Anapc1	2	128610104	128687391	protein_coding	KNOWN
ENSMUSG00000014361	0.56	0.57	0.62	0.59	0.57	0.53	0.56	0.57	0.54	0.54	0.582	0.548	Mertk	2	128698956	128802894	protein_coding	KNOWN
ENSMUSG00000014402	0.51	0.52	0.56	0.49	0.49	0.5	0.51	0.5	0.49	0.49	0.514	0.498	Tsg101	7	46888949	46919969	protein_coding	KNOWN
ENSMUSG00000014418	0.51	0.48	0.52	0.53	0.56	0.57	0.52	0.5	0.57	0.51	0.52	0.534	Hps5	7	46760466	46796064	protein_coding	KNOWN
ENSMUSG00000014426	0.47	0.51	0.51	0.48	0.48	0.51	0.48	0.49	0.49	0.45	0.49	0.484	Map3k4	17	12227621	12318660	protein_coding	KNOWN
ENSMUSG00000014444	0.31	0.34	0.41	0.39	0.43	0.35	0.38	0.4	0.32	0.38	0.376	0.366	Fam38a	8	122481698	122551329	protein_coding	KNOWN
ENSMUSG00000014470	0.5	0.55	0.51	0.51	0.51	0.5	0.52	0.51	0.52	0.45	0.516	0.5	Rnf166	8	122466147	122476064	protein_coding	KNOWN
ENSMUSG00000014496	0.54	0.52	0.5	0.54	0.52	0.54	0.52	0.5	0.49	0.56	0.524	0.522	Ankrd28	14	31700015	31830415	protein_coding	KNOWN
ENSMUSG00000014498	0.53	0.56	0.51	0.64	0.55	0.53	0.55	0.54	0.58	0.55	0.558	0.55	Ankrd52	10	128377115	128408704	protein_coding	KNOWN
ENSMUSG00000014503	0.48	0.37	0.51	0.39	0.45	0.48	0.49	0.47	0.5	0.49	0.44	0.486	Pkd2l2	18	34409423	34442789	protein_coding	KNOWN
ENSMUSG00000014504	0.55	0.52	0.48	0.55	0.62	0.47	0.61	0.52	0.45	0.48	0.544	0.506	Srp19	18	34330847	34336599	protein_coding	KNOWN
ENSMUSG00000014547	0.63	0.56	0.52	0.3	0.63	0.47	0.53	0.47	0.63	0.53	0.528	0.526	Wdfy2	14	62837690	62956886	protein_coding	KNOWN
ENSMUSG00000014550	0.55	0.54	0.57	0.55	0.54	0.56	0.55	0.56	0.55	0.55	0.55	0.554	Zfyve20	6	92186712	92214925	protein_coding	KNOWN
ENSMUSG00000014551	0.49	0.52	0.49	0.47	0.49	0.52	0.56	0.5	0.56	0.48	0.492	0.524	Mrps25	6	92169525	92184033	protein_coding	KNOWN
ENSMUSG00000014554	0.48	0.48	0.49	0.48	0.63	0.56	0.53	0.45	0.41	0.55	0.512	0.5	Dguok	6	83480217	83506969	protein_coding	KNOWN
ENSMUSG00000014592	0.59	0.57	0.55	0.58	0.6	0.57	0.56	0.57	0.57	0.58	0.578	0.57	Camta1	4	150917322	151861876	protein_coding	KNOWN
ENSMUSG00000014601	0.5	0.51	0.53	0.52	0.5	0.49	0.5	0.5	0.5	0.5	0.512	0.498	Fam40a	3	107612532	107631710	protein_coding	KNOWN
ENSMUSG00000014602	0.51	0.51	0.52	0.54	0.5	0.5	0.5	0.5	0.5	0.5	0.516	0.5	Kif1a	1	93015456	93101865	protein_coding	KNOWN
ENSMUSG00000014603	0.48	0.66	0.51	0.47	0.56	0.46	0.57	0.48	0.5	0.46	0.536	0.494	Alx3	3	107595031	107605769	protein_coding	KNOWN
ENSMUSG00000014606	0.46	0.52	0.48	0.53	0.5	0.49	0.5	0.47	0.5	0.51	0.498	0.494	Slc25a11	11	70644196	70647479	protein_coding	KNOWN
ENSMUSG00000014633	0.47	0.47	0.4	0.47	0.43	0.48	0.49	0.5	0.48	0.44	0.448	0.478	2310061C15Rik	8	116888685	116921455	protein_coding	KNOWN
ENSMUSG00000014725	0.63	0.33	0.19	0.61	0.56	0.54	0.46	0.56	0.44	0.42	0.464	0.484	Adam28	14	68606027	68655842	protein_coding	KNOWN
ENSMUSG00000014748	0.53	0.58	0.51	0.46	0.51	0.55	0.47	0.5	0.53	0.52	0.518	0.514	Tex261	6	83768881	83775812	protein_coding	KNOWN
ENSMUSG00000014763	0.55	0.51	0.58	0.56	0.5	0.55	0.54	0.52	0.56	0.54	0.54	0.542	Fam120b	17	15396246	15433580	protein_coding	KNOWN
ENSMUSG00000014767	0.48	0.51	0.47	0.52	0.54	0.49	0.51	0.48	0.54	0.47	0.504	0.498	Tbp	17	15499888	15528379	protein_coding	KNOWN
ENSMUSG00000014769	0.41	0.39	0.41	0.4	0.44	0.43	0.42	0.42	0.41	0.42	0.41	0.42	Psmb1	17	15475721	15498276	protein_coding	KNOWN
ENSMUSG00000014773	0.45	0.5	0.47	0.48	0.5	0.46	0.52	0.46	0.47	0.46	0.48	0.474	Dll1	17	15367354	15376872	protein_coding	KNOWN
ENSMUSG00000014776	0.56	0.65	0.72	0.64	0.57	0.55	0.68	0.58	0.61	0.6	0.628	0.604	Nol3	8	105276447	105281939	protein_coding	KNOWN
ENSMUSG00000014778	0.54	0.53	0.61	0.68	0.56	0.62	0.47	0.6	0.56	0.65	0.584	0.58	Fhod1	8	105329163	105347953	protein_coding	KNOWN
ENSMUSG00000014786	0.51	0.35	0.49	0.47	0.55	0.4	0.42	0.47	0.5	0.43	0.474	0.444	Slc9a5	8	105348258	105369881	protein_coding	KNOWN
ENSMUSG00000014791	0.46	0.37	0.28	0.56	0.63	0	0.44	0.38	0.3	0.26	0.46	0.276	Elmo3	8	105305601	105310623	protein_coding	KNOWN
ENSMUSG00000014813	0.45	0.5	0.6	0.54	0.45	0.45	0.38	0.43	0.48	0.49	0.508	0.446	Stc1	14	69029289	69041401	protein_coding	KNOWN
ENSMUSG00000014846	0.51	0.39	0.55	0.53	0.34	0.44	0.5	0.41	0.43	0.48	0.464	0.452	Tppp3	8	105467493	105471526	protein_coding	KNOWN
ENSMUSG00000014850	0.54	0.55	0.56	0.61	0.5	0.59	0.53	0.6	0.6	0.59	0.552	0.582	Msh3	13	92211881	92355003	protein_coding	KNOWN
ENSMUSG00000014859	0.53	0.52	0.57	0.55	0.53	0.52	0.56	0.52	0.55	0.54	0.54	0.538	E2f4	8	105297663	105305369	protein_coding	KNOWN
ENSMUSG00000014867	0.54	0.5	0.5	0.53	0.5	0.53	0.52	0.51	0.53	0.51	0.514	0.52	Surf4	2	26920040	26933928	protein_coding	KNOWN
ENSMUSG00000014873	0.52	0.41	0.59	0.51	0.56	0.43	0.54	0.46	0.53	0.46	0.518	0.484	Surf2	2	26916367	26920183	protein_coding	KNOWN
ENSMUSG00000014905	0.5	0.5	0.43	0.46	0.51	0.5	0.46	0.49	0.43	0.45	0.48	0.466	Dnajb9	12	44205897	44210068	protein_coding	KNOWN
ENSMUSG00000014907	0.53	0.56	0.52	0.56	0.54	0.59	0.63	0.62	0.56	0.61	0.542	0.602	Naf1	8	66860217	66890564	protein_coding	KNOWN
ENSMUSG00000014932	0.5	0.51	0.54	0.49	0.5	0.48	0.5	0.48	0.49	0.52	0.508	0.494	Yes1	5	32611171	32687066	protein_coding	KNOWN
ENSMUSG00000014956	0.5	0.51	0.53	0.5	0.51	0.52	0.5	0.5	0.5	0.51	0.51	0.506	Ppp1cb	5	32458974	32517433	protein_coding	KNOWN
ENSMUSG00000014980	0.52	0.47	0.47	0.5	0.38	0.38	0.42	0.45	0.54	0.42	0.468	0.442	Tsen15	1	152370735	152386688	protein_coding	KNOWN
ENSMUSG00000015002	0.49	0.48	0.48	0.5	0.52	0.47	0.49	0.5	0.49	0.49	0.494	0.488	Efr3a	15	65787034	65873816	protein_coding	KNOWN
ENSMUSG00000015013	0.42	0.37	0.4	0.46	0.43	0.35	0.4	0.42	0.44	0.44	0.416	0.41	Trappc2l	8	122611626	122615588	protein_coding	KNOWN
ENSMUSG00000015016	0.63	0.63	0.68	0.74	0.74	0.7	0.58	0.63	0.66	0.6	0.684	0.634	Acsf3	8	122775505	122817880	protein_coding	KNOWN
ENSMUSG00000015023	0.39	0.59	0.64	0.44	0.56	0.48	0.44	0.44	0.39	0.5	0.524	0.45	Ddx19a	8	110974996	110997800	protein_coding	KNOWN
ENSMUSG00000015027	0.26	0.28	0.22	0.32	0.23	0.25	0.35	0.3	0.33	0.31	0.262	0.308	Galns	8	122578238	122611487	protein_coding	KNOWN
ENSMUSG00000015087	0.52	0.49	0.5	0.51	0.54	0.52	0.49	0.5	0.5	0.53	0.512	0.508	B230208H17Rik	2	25583018	25608521	protein_coding	KNOWN
ENSMUSG00000015090	0.46	0.45	0.46	0.46	0.47	0.46	0.45	0.45	0.46	0.45	0.46	0.454	Ptgds	2	25466709	25470046	protein_coding	KNOWN
ENSMUSG00000015092	0.5	0.49	0.5	0.51	0.46	0.52	0.56	0.52	0.5	0.51	0.492	0.522	Edf1	2	25557847	25562082	protein_coding	KNOWN
ENSMUSG00000015094	0.52	0.5	0.51	0.51	0.51	0.51	0.53	0.5	0.5	0.52	0.51	0.512	Npdc1	2	25399351	25409494	protein_coding	KNOWN
ENSMUSG00000015095	0.49	0.48	0.5	0.53	0.54	0.53	0.53	0.51	0.5	0.5	0.508	0.514	Fbxw5	2	25500750	25505471	protein_coding	KNOWN
ENSMUSG00000015112	0.4	0.35	0.48	0.41	0.47	0.49	0.42	0.43	0.43	0.42	0.422	0.438	Slc25a13	6	6041218	6217118	protein_coding	KNOWN
ENSMUSG00000015120	0.5	0.51	0.52	0.49	0.51	0.5	0.5	0.5	0.49	0.49	0.506	0.496	Ube2i	17	25261916	25274622	protein_coding	KNOWN
ENSMUSG00000015126	0.46	0.52	0.53	0.51	0.45	0.54	0.44	0.45	0.46	0.46	0.494	0.47	0610007P22Rik	17	25240170	25242798	protein_coding	KNOWN
ENSMUSG00000015127	0.52	0.35	0.44	0.45	0.45	0.44	0.55	0.47	0.49	0.53	0.442	0.496	Unkl	17	25188397	25234443	protein_coding	KNOWN
ENSMUSG00000015133	0.72	0.68	0.69	0.62	0.59	0.6	0.65	0.68	0.74	0.63	0.66	0.66	Lrrk1	7	66226912	66388350	protein_coding	KNOWN
ENSMUSG00000015134	0.65	0.51	0.58	0.69	0.39	0.61	0.68	0.65	0.65	0.67	0.564	0.652	Aldh1a3	7	66390892	66427517	protein_coding	KNOWN
ENSMUSG00000015143	0.57	0.59	0.6	0.61	0.59	0.57	0.62	0.53	0.55	0.59	0.592	0.572	Actn1	12	80167542	80260371	protein_coding	KNOWN
ENSMUSG00000015149	0.51	0.5	0.49	0.5	0.52	0.52	0.54	0.51	0.53	0.52	0.504	0.524	Sirt2	7	28766735	28788665	protein_coding	KNOWN
ENSMUSG00000015165	0.5	0.5	0.48	0.48	0.53	0.52	0.49	0.49	0.5	0.49	0.498	0.498	Hnrnpl	7	28808541	28822266	protein_coding	KNOWN
ENSMUSG00000015176	0.53	0.5	0.52	0.53	0.5	0.5	0.5	0.53	0.52	0.51	0.516	0.512	Nolc1	19	46075863	46085528	protein_coding	KNOWN
ENSMUSG00000015189	0.48	0.5	0.51	0.5	0.48	0.45	0.47	0.46	0.47	0.46	0.494	0.462	Casd1	6	4600840	4643381	protein_coding	KNOWN
ENSMUSG00000015202	0.44	0.38	0.49	0.56	0.36	0.49	0.41	0.42	0.47	0.49	0.446	0.456	Cnksr3	10	7119063	7212237	protein_coding	KNOWN
ENSMUSG00000015217	0.2	0.3	0.2	0.27	0.28	0.41	0.5	0.61	0.36	0.35	0.25	0.446	Hmgb3	X	71555918	71560676	protein_coding	KNOWN
ENSMUSG00000015222	0.53	0.54	0.54	0.54	0.55	0.52	0.53	0.54	0.55	0.54	0.54	0.536	Mtap2	1	66175273	66442583	protein_coding	KNOWN
ENSMUSG00000015224	0.48	0.51	0.52	0.42	0.5	0.52	0.53	0.52	0.52	0.51	0.486	0.52	Cyp2j9	4	96568429	96591578	protein_coding	KNOWN
ENSMUSG00000015243	0.5	0.48	0.5	0.49	0.51	0.48	0.47	0.48	0.49	0.51	0.496	0.486	Abca1	4	53030787	53159895	protein_coding	KNOWN
ENSMUSG00000015289	0.21	0.29	0.22	0.27	0.15	0.43	0.4	0.56	0.37	0.29	0.228	0.41	Lage3	X	74351276	74353618	protein_coding	KNOWN
ENSMUSG00000015291	0.19	0.3	0.31	0.29	0.32	0.47	0.43	0.58	0.34	0.34	0.282	0.432	Gdi1	X	74304998	74311862	protein_coding	KNOWN
ENSMUSG00000015305	0.51	0.5	0.51	0.52	0.52	0.52	0.51	0.51	0.51	0.5	0.512	0.51	Sash1	10	8722219	8886070	protein_coding	KNOWN
ENSMUSG00000015312	0.45	0.5	0.46	0.41	0.48	0.5	0.41	0.53	0.49	0.49	0.46	0.484	Gadd45b	10	80930091	80932204	protein_coding	KNOWN
ENSMUSG00000015337	0.47	0.46	0.51	0.49	0.53	0.47	0.42	0.49	0.53	0.45	0.492	0.472	Endog	2	30171493	30174069	protein_coding	KNOWN
ENSMUSG00000015340	0	0.33	0.12	0.14	0.16	0.44	0.29	0.57	0.25	0.3	0.15	0.37	Cybb	X	9435252	9487771	protein_coding	KNOWN
ENSMUSG00000015342	0.16	0.26	0.23	0.24	0.27	0.38	0.38	0.55	0.25	0.27	0.232	0.366	Xk	X	9272756	9313250	protein_coding	KNOWN
ENSMUSG00000015354	0.57	0.55	0.41	0.65	0.55	0.52	0.6	0.59	0.71	0.59	0.546	0.602	Pcolce2	9	95637601	95698096	protein_coding	KNOWN
ENSMUSG00000015377	0.54	0.52	0.54	0.57	0.55	0.55	0.61	0.56	0.55	0.56	0.544	0.566	Fam116b	15	89182217	89196474	protein_coding	KNOWN
ENSMUSG00000015396	0.5	0.46	0.56	0.43	0.48	0.53	0.5	0.54	0.46	0.53	0.486	0.512	Cd83	13	43785107	43803130	protein_coding	KNOWN
ENSMUSG00000015468	0.49	0.63	0.55	0.4	0.32	0.52	0.42	0.33	0.56	0.58	0.478	0.482	Notch4	17	34564268	34588503	protein_coding	KNOWN
ENSMUSG00000015474	0.39	0.58	0.73	0.5	0.43	0.45	0.56	0.54	0.59	0.44	0.526	0.516	Ppt2	17	34616662	34628510	protein_coding	KNOWN
ENSMUSG00000015476	0.5	0.5	0.5	0.5	0.5	0.5	0.5	0.5	0.5	0.5	0.5	0.5	Prrt1	17	34629533	34633126	protein_coding	KNOWN
ENSMUSG00000015484	0.48	0.47	0.41	0.48	0.48	0.45	0.46	0.45	0.45	0.46	0.464	0.454	Fam163a	1	156075966	156205026	protein_coding	KNOWN
ENSMUSG00000015488	0.54	0.52	0.53	0.51	0.54	0.55	0.52	0.51	0.52	0.54	0.528	0.528	5930434B04Rik	2	27009926	27021089	protein_coding	KNOWN
ENSMUSG00000015501	0.5	0.49	0.51	0.51	0.49	0.5	0.5	0.51	0.51	0.52	0.5	0.508	Hivep2	10	13966379	14151376	protein_coding	KNOWN
ENSMUSG00000015522	0.54	0.51	0.48	0.54	0.45	0.51	0.53	0.49	0.51	0.5	0.504	0.508	Arnt	3	95434388	95497240	protein_coding	KNOWN
ENSMUSG00000015533	0.21	0.23	0	0	0	0.12	0.19	0.21	0.22	0.23	0.088	0.194	Itga2	13	114835916	114932041	protein_coding	KNOWN
ENSMUSG00000015536	0.52	0.52	0.48	0.51	0.48	0.51	0.5	0.52	0.49	0.52	0.502	0.508	Mocs2	13	114818244	114829006	protein_coding	KNOWN
ENSMUSG00000015542	0.53	0.44	0.57	0.52	0.57	0.45	0.53	0.49	0.52	0.46	0.526	0.49	Nat9	11	115182832	115187859	protein_coding	KNOWN
ENSMUSG00000015568	0.18	0.14	0.19	0.17	0.26	0.17	0.2	0.25	0.12	0.16	0.188	0.18	Lpl	8	68880491	68907448	protein_coding	KNOWN
ENSMUSG00000015575	0.59	0.5	0.63	0.61	0.62	0.52	0.53	0.52	0.59	0.58	0.59	0.548	Atp6v0e	17	26676396	26699644	protein_coding	KNOWN
ENSMUSG00000015597	0.52	0.55	0.44	0.54	0.55	0.52	0.49	0.43	0.53	0.47	0.52	0.488	Zfp318	17	46383731	46420920	protein_coding	KNOWN
ENSMUSG00000015599	0.47	0.51	0.45	0.5	0.49	0.47	0.5	0.49	0.48	0.47	0.484	0.482	Ttbk1	17	46442448	46487675	protein_coding	KNOWN
ENSMUSG00000015605	0.5	0.56	0.52	0.62	0.54	0.45	0.52	0.54	0.47	0.49	0.548	0.494	Srf	17	46546839	46556162	protein_coding	KNOWN
ENSMUSG00000015647	0.53	0.58	0.54	0.45	0.57	0.53	0.52	0.54	0.57	0.52	0.534	0.536	Lama5	2	180176373	180225859	protein_coding	KNOWN
ENSMUSG00000015653	0.48	0.5	0.52	0.48	0.52	0.5	0.51	0.49	0.5	0.5	0.5	0.5	Steap2	5	5664831	5694578	protein_coding	KNOWN
ENSMUSG00000015656	0.48	0.47	0.48	0.45	0.48	0.49	0.49	0.48	0.47	0.48	0.472	0.482	Hspa8	9	40800984	40805200	protein_coding	KNOWN
ENSMUSG00000015659	0.63	0.53	0.62	0.58	0.6	0.57	0.53	0.58	0.55	0.56	0.592	0.558	Serac1	17	6042196	6079741	protein_coding	KNOWN
ENSMUSG00000015671	0.5	0.44	0.5	0.54	0.51	0.49	0.52	0.5	0.48	0.46	0.498	0.49	Psma2	13	14613242	14625671	protein_coding	KNOWN
ENSMUSG00000015672	0.53	0.58	0.55	0.48	0.5	0.5	0.53	0.48	0.53	0.54	0.528	0.516	Mrpl32	13	14610301	14613037	protein_coding	KNOWN
ENSMUSG00000015697	0.51	0.55	0.54	0.51	0.49	0.52	0.55	0.48	0.51	0.46	0.52	0.504	Setdb1	3	95323525	95357202	protein_coding	KNOWN
ENSMUSG00000015709	0.49	0.52	0.48	0.47	0.52	0.51	0.48	0.49	0.5	0.49	0.496	0.494	Arnt2	7	84246281	84409959	protein_coding	KNOWN
ENSMUSG00000015711	0.46	0.51	0.47	0.49	0.53	0.47	0.49	0.48	0.53	0.51	0.492	0.496	Prune	3	95253674	95282076	protein_coding	KNOWN
ENSMUSG00000015714	0.56	0.55	0.51	0.55	0.48	0.53	0.53	0.5	0.5	0.55	0.53	0.522	Lass2	3	95314792	95323588	protein_coding	KNOWN
ENSMUSG00000015733	0.47	0.47	0.51	0.46	0.47	0.5	0.47	0.47	0.49	0.47	0.476	0.48	Capza2	6	17636234	17666972	protein_coding	KNOWN
ENSMUSG00000015745	0.43	0.48	0.5	0.52	0.44	0.49	0.5	0.47	0.5	0.45	0.474	0.482	Plekho1	3	95988429	95996001	protein_coding	KNOWN
ENSMUSG00000015748	0.54	0.56	0.54	0.43	0.4	0.48	0.56	0.43	0.57	0.48	0.494	0.504	Prpf3	3	95830124	95855885	protein_coding	KNOWN
ENSMUSG00000015749	0.48	0.51	0.51	0.53	0.57	0.53	0.49	0.48	0.48	0.5	0.52	0.496	Anp32e	3	95929246	95947390	protein_coding	KNOWN
ENSMUSG00000015750	0.48	0.55	0.46	0.46	0.44	0.34	0.59	0.56	0.56	0.64	0.478	0.538	Aph1a	3	95893969	95898288	protein_coding	KNOWN
ENSMUSG00000015755	0.49	0.53	0.55	0.47	0.48	0.52	0.45	0.48	0.47	0.5	0.504	0.484	Tab2	10	7905653	7956230	protein_coding	KNOWN
ENSMUSG00000015757	0.43	0.45	0.46	0.45	0.44	0.46	0.44	0.43	0.44	0.44	0.446	0.442	Ppil4	10	7792891	7823135	protein_coding	KNOWN
ENSMUSG00000015766	0.49	0.5	0.52	0.52	0.48	0.5	0.52	0.49	0.51	0.49	0.502	0.502	Eps8	6	137477245	137654876	protein_coding	KNOWN
ENSMUSG00000015776	0.48	0.48	0.48	0.48	0.51	0.55	0.51	0.52	0.52	0.53	0.486	0.526	Med22	2	26905262	26910677	protein_coding	KNOWN
ENSMUSG00000015790	0.5	0.51	0.53	0.48	0.51	0.49	0.51	0.52	0.53	0.52	0.506	0.514	Surf1	2	26913383	26916530	protein_coding	KNOWN
ENSMUSG00000015804	0.48	0.49	0.53	0.47	0.5	0.49	0.49	0.5	0.47	0.49	0.494	0.488	Med28	5	45520221	45529276	protein_coding	KNOWN
ENSMUSG00000015806	0.56	0.57	0.52	0.55	0.56	0.57	0.57	0.56	0.57	0.54	0.552	0.562	Qdpr	5	45434032	45450235	protein_coding	KNOWN
ENSMUSG00000015829	0.49	0.57	0.47	0.57	0.51	0.5	0.47	0.49	0.52	0.46	0.522	0.488	Tnr	1	159737510	159924397	protein_coding	KNOWN
ENSMUSG00000015839	0.56	0.47	0.53	0.47	0.47	0.44	0.53	0.48	0.53	0.5	0.5	0.496	Nfe2l2	2	75675513	75704641	protein_coding	KNOWN
ENSMUSG00000015846	0.51	0.58	0.5	0.55	0.43	0.49	0.57	0.54	0.55	0.55	0.514	0.54	Rxra	2	27676440	27762957	protein_coding	KNOWN
ENSMUSG00000015852	0.37	0.4	0.41	0.38	0.32	0.37	0.37	0.38	0.38	0.36	0.376	0.372	Fcrls	3	87250758	87263738	protein_coding	KNOWN
ENSMUSG00000015869	0.4	0.4	0.4	0.4	0.42	0.4	0.42	0.41	0.36	0.41	0.404	0.4	Prpsap1	11	116470845	116494202	protein_coding	KNOWN
ENSMUSG00000015879	0.36	0.38	0.29	0.38	0.41	0.4	0.34	0.36	0.33	0.35	0.364	0.356	Fam184b	5	45529706	45639501	protein_coding	KNOWN
ENSMUSG00000015882	0.56	0.56	0.53	0.54	0.58	0.57	0.55	0.54	0.61	0.6	0.554	0.574	Lcorl	5	45697181	45857615	protein_coding	KNOWN
ENSMUSG00000015889	0.48	0.49	0.42	0.48	0.42	0.45	0.46	0.44	0.45	0.46	0.458	0.452	Lta4h	10	93453396	93484896	protein_coding	KNOWN
ENSMUSG00000015932	0.52	0.5	0.53	0.52	0.51	0.52	0.5	0.52	0.52	0.5	0.516	0.512	Dstn	2	143915320	143943324	protein_coding	KNOWN
ENSMUSG00000015937	0.54	0.53	0.59	0.58	0.53	0.59	0.57	0.55	0.57	0.58	0.554	0.572	H2afy	13	56073619	56136361	protein_coding	KNOWN
ENSMUSG00000015942	0.43	0.43	0.49	0.49	0.48	0.48	0.49	0.52	0.55	0.53	0.464	0.514	Gtf2ird2	5	134184019	134224355	protein_coding	KNOWN
ENSMUSG00000015944	0.53	0.52	0.52	0.6	0.52	0.52	0.53	0.51	0.51	0.51	0.538	0.516	Gatsl2	5	134099711	134144343	protein_coding	KNOWN
ENSMUSG00000015947	0.69	0.4	0.43	0.54	0.44	0.31	0	0.54	0.5	0.48	0.5	0.366	Fcgr1	3	96282909	96293969	protein_coding	KNOWN
ENSMUSG00000015961	0.55	0.52	0.5	0.53	0.57	0.5	0.5	0.52	0.52	0.5	0.534	0.508	Adss	1	177762962	177796511	protein_coding	KNOWN
ENSMUSG00000015968	0.51	0.52	0.51	0.51	0.5	0.53	0.5	0.53	0.52	0.52	0.51	0.52	Cacna1d	14	30039949	30491156	protein_coding	KNOWN
ENSMUSG00000015970	0.45	0.46	0.46	0.53	0.45	0.54	0.38	0.54	0.54	0.44	0.47	0.488	Chdh	14	30009023	30040466	protein_coding	KNOWN
ENSMUSG00000015971	0.48	0.44	0.39	0.54	0.58	0.5	0.47	0.46	0.52	0.48	0.486	0.486	Actr8	14	29978337	29993221	protein_coding	KNOWN
ENSMUSG00000015980	0.67	0.68	0.57	0.49	0.59	0.63	0.59	0.53	0.43	0.62	0.6	0.56	Lrrc27	7	139212988	139242979	protein_coding	KNOWN
ENSMUSG00000015994	0.52	0.51	0.52	0.5	0.52	0.51	0.51	0.52	0.51	0.51	0.514	0.512	Fnta	8	25998729	26015601	protein_coding	KNOWN
ENSMUSG00000016018	0.53	0.47	0.54	0.51	0.5	0.57	0.51	0.54	0.54	0.52	0.51	0.536	Skiv2l2	13	112867780	112927380	protein_coding	KNOWN
ENSMUSG00000016024	0.63	0.58	0.59	0.65	0.39	0.55	0.5	0.59	0.51	0.55	0.568	0.54	Lbp	2	158306493	158332852	protein_coding	KNOWN
ENSMUSG00000016028	0.39	0.41	0.56	0.48	0.45	0.48	0.56	0.46	0.56	0.48	0.458	0.508	Celsr1	15	85898758	86033777	protein_coding	KNOWN
ENSMUSG00000016087	0.56	0.57	0.54	0.67	0.36	0.61	0.62	0.56	0.49	0.52	0.54	0.56	Fli1	9	32422208	32541389	protein_coding	KNOWN
ENSMUSG00000016179	0.47	0.48	0.51	0.42	0.4	0.47	0.45	0.48	0.41	0.49	0.456	0.46	Camk1g	1	193346346	193370297	protein_coding	KNOWN
ENSMUSG00000016181	0.57	0.58	0.58	0.64	0.44	0.5	0.62	0.56	0.5	0.51	0.562	0.538	Diexf	1	193104403	193130251	protein_coding	KNOWN
ENSMUSG00000016200	0.57	0.57	0.35	0.6	0.44	0.37	0.45	0.52	0.44	0.44	0.506	0.444	Syt14	1	192897307	193035698	protein_coding	KNOWN
ENSMUSG00000016206	0.54	0.57	0.29	0.36	0.5	0.46	0.43	0.43	0.43	0.43	0.452	0.436	H2-M3	17	37270220	37274484	protein_coding	KNOWN
ENSMUSG00000016252	0.51	0.51	0.5	0.5	0.51	0.48	0.48	0.52	0.48	0.52	0.506	0.496	Atp5e	2	174461072	174464105	protein_coding	KNOWN
ENSMUSG00000016253	0.45	0.44	0.56	0.45	0.48	0.46	0.51	0.51	0.54	0.48	0.476	0.5	Th1l	2	174415804	174427502	protein_coding	KNOWN
ENSMUSG00000016256	0.53	0.54	0.49	0.53	0.49	0.55	0.57	0.57	0.57	0.6	0.516	0.572	Ctsz	2	174427493	174439039	protein_coding	KNOWN
ENSMUSG00000016257	0.48	0.47	0.52	0.47	0.45	0.52	0.5	0.5	0.53	0.49	0.478	0.508	Slmo2	2	174465067	174473081	protein_coding	KNOWN
ENSMUSG00000016262	0.53	0.54	0.54	0.54	0.59	0.55	0.54	0.55	0.54	0.56	0.548	0.548	Sertad4	1	192844431	192855752	protein_coding	KNOWN
ENSMUSG00000016344	0.55	0.55	0.54	0.54	0.55	0.56	0.58	0.52	0.55	0.55	0.546	0.552	Ppdpf	2	181187247	181188771	protein_coding	KNOWN
ENSMUSG00000016346	0.49	0.47	0.5	0.51	0.48	0.48	0.48	0.47	0.48	0.49	0.49	0.48	Kcnq2	2	181075579	181135291	protein_coding	KNOWN
ENSMUSG00000016349	0.5	0.52	0.51	0.5	0.46	0.52	0.49	0.5	0.5	0.49	0.498	0.5	Eef1a2	2	181147653	181157014	protein_coding	KNOWN
ENSMUSG00000016386	0.48	0.5	0.49	0.47	0.49	0.48	0.44	0.48	0.53	0.49	0.486	0.484	Mpped2	2	106693269	106868356	protein_coding	KNOWN
ENSMUSG00000016409	0.14	0.22	0.29	0.3	0.31	0.41	0.41	0.53	0.31	0.31	0.252	0.394	Nkap	X	37126795	37150746	protein_coding	KNOWN
ENSMUSG00000016477	0.56	0.46	0.56	0.54	0.49	0.58	0.51	0.51	0.47	0.49	0.522	0.512	E2f3	13	29906575	29985668	protein_coding	KNOWN
ENSMUSG00000016481	0.57	0.61	0.57	0.49	0.47	0.59	0.53	0.6	0.46	0.51	0.542	0.538	Cr1l	1	195103789	195131570	protein_coding	KNOWN
ENSMUSG00000016487	0.47	0.45	0.47	0.48	0.46	0.44	0.46	0.48	0.46	0.47	0.466	0.462	Ppfibp1	6	146888487	147032025	protein_coding	KNOWN
ENSMUSG00000016493	0.76	0.31	0.54	0.95	0.75	0.5	0.5	0.48	0.68	0.68	0.662	0.568	Cd46	1	195041285	195092248	protein_coding	KNOWN
ENSMUSG00000016494	0.53	0.52	0.54	0.56	0.55	0.6	0.56	0.61	0.59	0.57	0.54	0.586	Cd34	1	194938821	194961292	protein_coding	KNOWN
ENSMUSG00000016495	0.58	0.55	0.53	0.51	0.58	0.5	0.46	0.47	0.47	0.47	0.55	0.474	5033414D02Rik	19	29348599	29367390	protein_coding	KNOWN
ENSMUSG00000016496	0.58	0.53	0.39	0.63	0.79	0.57	0.45	0.55	0.55	0.57	0.584	0.538	Cd274	19	29367455	29388095	protein_coding	KNOWN
ENSMUSG00000016503	0.53	0.48	0.53	0.55	0.47	0.57	0.48	0.52	0.53	0.5	0.512	0.52	Gtf3a	5	146948657	146955614	protein_coding	KNOWN
ENSMUSG00000016510	0.58	0.55	0.59	0.54	0.5	0.52	0.53	0.5	0.56	0.5	0.552	0.522	Mtif3	5	146951573	146963800	protein_coding	KNOWN
ENSMUSG00000016520	0.51	0.48	0.46	0.48	0.43	0.49	0.42	0.49	0.44	0.47	0.472	0.462	Lnx2	5	147016655	147076586	protein_coding	KNOWN
ENSMUSG00000016526	0.49	0.41	0.41	0.42	0.51	0.41	0.48	0.49	0.43	0.42	0.448	0.446	Dyrk3	1	131128441	131138234	protein_coding	KNOWN
ENSMUSG00000016528	0.49	0.45	0.43	0.49	0.49	0.51	0.48	0.49	0.56	0.52	0.47	0.512	Mapkapk2	1	131053704	131097543	protein_coding	KNOWN
ENSMUSG00000016534	0.15	0.24	0.24	0.29	0.32	0.43	0.39	0.52	0.28	0.37	0.248	0.398	Lamp2	X	38401357	38456454	protein_coding	KNOWN
ENSMUSG00000016541	0.48	0.5	0.48	0.48	0.48	0.47	0.47	0.49	0.52	0.51	0.484	0.492	Atxn10	15	85336381	85463836	protein_coding	KNOWN
ENSMUSG00000016554	0.48	0.46	0.5	0.48	0.5	0.48	0.45	0.48	0.48	0.49	0.484	0.476	Eif3d	15	77958998	77970824	protein_coding	KNOWN
ENSMUSG00000016619	0.52	0.49	0.48	0.53	0.49	0.47	0.47	0.52	0.49	0.47	0.502	0.484	Nup50	15	84923428	84942955	protein_coding	KNOWN
ENSMUSG00000016637	0.57	0.53	0.58	0.49	0.54	0.51	0.54	0.55	0.59	0.5	0.542	0.538	Ift27	15	78159465	78174108	protein_coding	KNOWN
ENSMUSG00000016757	0.52	0.53	0.56	0.47	0.51	0.56	0.55	0.53	0.52	0.51	0.518	0.534	Ttll12	15	83575119	83595157	protein_coding	KNOWN
ENSMUSG00000016763	0.51	0.51	0.5	0.49	0.5	0.49	0.5	0.52	0.5	0.5	0.502	0.502	Scube1	15	83602583	83725021	protein_coding	KNOWN
ENSMUSG00000016831	0.55	0.55	0.53	0.55	0.54	0.55	0.53	0.51	0.54	0.53	0.544	0.532	Tox4	14	52279146	52296391	protein_coding	KNOWN
ENSMUSG00000016833	0.48	0.5	0.55	0.49	0.52	0.52	0.56	0.46	0.52	0.53	0.508	0.518	Mrps18c	5	100798627	100804471	protein_coding	KNOWN
ENSMUSG00000016921	0.46	0.51	0.51	0.46	0.51	0.45	0.5	0.5	0.48	0.46	0.49	0.478	Srsf6	2	162931528	162937121	protein_coding	KNOWN
ENSMUSG00000016933	0.5	0.5	0.48	0.49	0.47	0.5	0.51	0.48	0.51	0.47	0.488	0.494	Plcg1	2	160731300	160775760	protein_coding	KNOWN
ENSMUSG00000016940	0.46	0.47	0.49	0.5	0.46	0.48	0.47	0.48	0.49	0.48	0.476	0.48	Kctd2	11	115420128	115431274	protein_coding	KNOWN
ENSMUSG00000016942	0.44	0.67	1	0	0.43	0.5	0.67	0.49	0.5	0.43	0.508	0.518	Tmprss6	15	78439668	78468634	protein_coding	KNOWN
ENSMUSG00000016946	0.48	0.52	0.51	0.47	0.47	0.46	0.44	0.45	0.44	0.49	0.49	0.456	Kctd5	17	24047734	24073485	protein_coding	KNOWN
ENSMUSG00000016984	0.45	0.51	0.47	0.45	0.46	0.5	0.5	0.48	0.54	0.49	0.468	0.502	Etaa1	11	17938756	17953875	protein_coding	KNOWN
ENSMUSG00000016995	0.57	0.57	0.58	0.71	0.62	0.65	0.61	0.66	0.61	0.67	0.61	0.64	Matn4	2	164389393	164405160	protein_coding	KNOWN
ENSMUSG00000017007	0.76	0.46	0.59	0.74	0.68	0.53	0.73	0.69	0.57	0.74	0.646	0.652	Rbpjl	2	164403141	164415448	protein_coding	KNOWN
ENSMUSG00000017009	0.54	0.51	0.51	0.55	0.54	0.53	0.54	0.56	0.54	0.52	0.53	0.538	Sdc4	2	164424247	164443887	protein_coding	KNOWN
ENSMUSG00000017057	0.17	0.01	0	0.42	0.23	0.36	0.36	0.61	0.19	0.2	0.166	0.344	Il13ra1	X	36112110	36171259	protein_coding	KNOWN
ENSMUSG00000017119	0.48	0.49	0.5	0.49	0.49	0.5	0.48	0.49	0.48	0.49	0.49	0.488	Nbr1	11	101552149	101581951	protein_coding	KNOWN
ENSMUSG00000017132	0.52	0.54	0.5	0.54	0.5	0.54	0.54	0.54	0.53	0.52	0.52	0.534	Cyth1	11	118132019	118248592	protein_coding	KNOWN
ENSMUSG00000017144	0.46	0.5	0.47	0.44	0.46	0.48	0.48	0.48	0.47	0.47	0.466	0.476	Rnd3	2	51130438	51149111	protein_coding	KNOWN
ENSMUSG00000017146	0.54	0.56	0.4	0.53	0.59	0.51	0.56	0.54	0.63	0.5	0.524	0.548	Brca1	11	101488764	101551955	protein_coding	KNOWN
ENSMUSG00000017167	0.5	0.48	0.5	0.52	0.46	0.48	0.47	0.47	0.47	0.45	0.492	0.468	Cntnap1	11	101170523	101190724	protein_coding	KNOWN
ENSMUSG00000017188	0.46	0.47	0.47	0.43	0.48	0.46	0.47	0.45	0.43	0.47	0.462	0.456	Ccdc56	11	101277968	101279114	protein_coding	KNOWN
ENSMUSG00000017210	0.5	0.49	0.5	0.5	0.49	0.51	0.49	0.51	0.48	0.5	0.496	0.498	Med24	11	98704591	98729435	protein_coding	KNOWN
ENSMUSG00000017221	0.51	0.53	0.51	0.49	0.5	0.52	0.54	0.51	0.49	0.51	0.508	0.514	Psmd3	11	98682554	98695979	protein_coding	KNOWN
ENSMUSG00000017286	0.58	0.6	0.66	0.54	0.53	0.53	0.54	0.56	0.58	0.59	0.582	0.56	Glod4	11	76120987	76243725	protein_coding	KNOWN
ENSMUSG00000017288	0.52	0.52	0.52	0.5	0.55	0.52	0.52	0.56	0.54	0.51	0.522	0.53	Vps53	11	76046226	76179647	protein_coding	KNOWN
ENSMUSG00000017291	0.47	0.5	0.49	0.5	0.48	0.46	0.48	0.48	0.51	0.49	0.488	0.484	Taok1	11	77529162	77607815	protein_coding	KNOWN
ENSMUSG00000017299	0.5	0.44	0.47	0.42	0.53	0.43	0.53	0.5	0.48	0.48	0.472	0.484	Dnttip1	2	164745983	164768607	protein_coding	KNOWN
ENSMUSG00000017307	0.46	0.45	0.36	0.42	0.47	0.42	0.49	0.53	0.4	0.42	0.432	0.452	Acot8	2	164792768	164804882	protein_coding	KNOWN
ENSMUSG00000017314	0.47	0.51	0.48	0.52	0.51	0.49	0.48	0.48	0.48	0.49	0.498	0.484	Mpp2	11	102057015	102088515	protein_coding	KNOWN
ENSMUSG00000017344	0.64	0.62	0.66	0.59	0.64	0.61	0.62	0.62	0.61	0.61	0.63	0.614	Vtn	11	78499091	78502324	protein_coding	KNOWN
ENSMUSG00000017376	0.53	0.53	0.54	0.54	0.49	0.5	0.49	0.51	0.53	0.51	0.526	0.508	Nlk	11	78567168	78697373	protein_coding	KNOWN
ENSMUSG00000017386	0.49	0.56	0.42	0.58	0.45	0.49	0.54	0.57	0.58	0.53	0.5	0.542	Traf4	11	78158499	78165589	protein_coding	KNOWN
ENSMUSG00000017390	0.54	0.55	0.55	0.52	0.54	0.54	0.54	0.54	0.54	0.55	0.54	0.542	Aldoc	11	78322968	78327781	protein_coding	KNOWN
ENSMUSG00000017400	0.5	0.53	0.48	0.59	0.49	0.52	0.5	0.53	0.51	0.54	0.518	0.52	Stac2	11	98036623	98053462	protein_coding	KNOWN
ENSMUSG00000017412	0.44	0.47	0.45	0.46	0.43	0.46	0.46	0.45	0.45	0.45	0.45	0.454	Cacnb4	2	52428320	52676831	protein_coding	KNOWN
ENSMUSG00000017417	0.51	0.5	0.43	0.53	0.58	0.55	0.58	0.51	0.52	0.55	0.51	0.542	Plxdc1	11	97923238	97986444	protein_coding	KNOWN
ENSMUSG00000017418	0.52	0.52	0.54	0.56	0.53	0.5	0.49	0.53	0.53	0.52	0.534	0.514	Arl5b	2	15049395	15082456	protein_coding	KNOWN
ENSMUSG00000017428	0.53	0.5	0.6	0.58	0.57	0.61	0.58	0.55	0.54	0.6	0.556	0.576	Psmd11	11	80428615	80473248	protein_coding	KNOWN
ENSMUSG00000017453	0.46	0.39	0.46	0.57	0.41	0.58	0.45	0.58	0.64	0.44	0.458	0.538	Pipox	11	77880615	77894096	protein_coding	KNOWN
ENSMUSG00000017466	0.49	0.48	0.48	0.51	0.5	0.49	0.49	0.49	0.5	0.48	0.492	0.49	Timp2	11	118301069	118355740	protein_coding	KNOWN
ENSMUSG00000017478	0.45	0.52	0.47	0.51	0.44	0.43	0.52	0.47	0.54	0.51	0.478	0.494	Zc3h18	8	122376609	122417360	protein_coding	KNOWN
ENSMUSG00000017485	0.51	0.55	0.5	0.53	0.51	0.53	0.55	0.5	0.5	0.52	0.52	0.52	Top2b	14	16365179	16430787	protein_coding	KNOWN
ENSMUSG00000017491	0.4	0.41	0.67	0.54	0.5	0.38	0.42	0.57	0.44	0.38	0.504	0.438	Rarb	14	16430842	16575472	protein_coding	KNOWN
ENSMUSG00000017493	0.6	0.61	0.6	0.63	0.63	0.6	0.59	0.63	0.64	0.62	0.614	0.616	Igfbp4	11	99041244	99054392	protein_coding	KNOWN
ENSMUSG00000017561	0.4	0.49	0.38	0.47	0.47	0.43	0.44	0.43	0.4	0.42	0.442	0.424	Crlf3	11	80046493	80080991	protein_coding	KNOWN
ENSMUSG00000017615	0.49	0.46	0.48	0.42	0.46	0.47	0.49	0.48	0.47	0.5	0.462	0.482	Tnfaip1	11	78522850	78536332	protein_coding	KNOWN
ENSMUSG00000017631	0.48	0.49	0.49	0.5	0.49	0.47	0.48	0.49	0.49	0.48	0.49	0.482	Abr	11	76416734	76622314	protein_coding	KNOWN
ENSMUSG00000017639	0.45	0.47	0.46	0.49	0.47	0.47	0.47	0.46	0.46	0.46	0.468	0.464	Rab11fip4	11	79591212	79698023	protein_coding	KNOWN
ENSMUSG00000017664	0.53	0.53	0.49	0.47	0.51	0.51	0.47	0.47	0.5	0.49	0.506	0.488	Slc35c2	2	165276554	165287869	protein_coding	KNOWN
ENSMUSG00000017667	0.51	0.47	0.49	0.53	0.51	0.53	0.53	0.53	0.53	0.5	0.502	0.524	Zfp334	2	165374264	165388259	protein_coding	KNOWN
ENSMUSG00000017670	0.51	0.5	0.52	0.48	0.49	0.52	0.5	0.51	0.52	0.52	0.5	0.514	Elmo2	2	165288031	165326479	protein_coding	KNOWN
ENSMUSG00000017677	0.63	0.59	0.56	0.64	0.59	0.6	0.61	0.59	0.62	0.58	0.602	0.6	Wsb1	11	79239372	79254671	protein_coding	KNOWN
ENSMUSG00000017679	0.52	0.52	0.49	0.5	0.51	0.52	0.52	0.52	0.52	0.52	0.508	0.52	Ttpal	2	163602314	163619013	protein_coding	KNOWN
ENSMUSG00000017686	0.52	0.46	0.47	0.52	0.51	0.5	0.48	0.51	0.53	0.46	0.496	0.496	Rhot1	11	80209019	80267907	protein_coding	KNOWN
ENSMUSG00000017692	0.42	0.51	0.54	0.43	0.46	0.46	0.49	0.44	0.43	0.42	0.472	0.448	Rhbdl3	11	80300912	80355955	protein_coding	KNOWN
ENSMUSG00000017707	0.47	0.48	0.48	0.51	0.4	0.48	0.48	0.47	0.47	0.48	0.468	0.476	Serinc3	2	163623272	163645131	protein_coding	KNOWN
ENSMUSG00000017713	0.66	0.6	0.78	0.54	0.56	0.63	0.67	0.63	0.7	0.68	0.628	0.662	Tha1	11	117867952	117873481	protein_coding	KNOWN
ENSMUSG00000017715	0.51	0.48	0.49	0.49	0.55	0.52	0.49	0.51	0.5	0.51	0.504	0.506	Pgs1	11	117986292	118024011	protein_coding	KNOWN
ENSMUSG00000017724	0.5	0.41	0.41	0.48	0.41	0.54	0.56	0.52	0.53	0.54	0.442	0.538	Etv4	11	101769742	101785371	protein_coding	KNOWN
ENSMUSG00000017734	0.59	0.57	0.55	0.55	0.52	0.54	0.57	0.54	0.53	0.55	0.556	0.546	Dbndd2	2	164486106	164493319	protein_coding	KNOWN
ENSMUSG00000017737	0.63	0.67	0.62	0.55	0.54	0.6	0.46	0.69	0.59	0.42	0.602	0.552	Mmp9	2	164940780	164955850	protein_coding	KNOWN
ENSMUSG00000017740	0.51	0.52	0.51	0.51	0.51	0.52	0.51	0.51	0.51	0.5	0.512	0.51	Slc12a5	2	164960816	164999727	protein_coding	KNOWN
ENSMUSG00000017747	0.59	0.64	0.62	0.54	0.6	0.51	0.59	0.59	0.56	0.56	0.598	0.562	Ghdc	11	100766032	100770957	protein_coding	KNOWN
ENSMUSG00000017754	0.43	0.42	0.53	0.49	0.5	0.5	0.46	0.5	0.48	0.49	0.474	0.486	Pltp	2	164839518	164857711	protein_coding	KNOWN
ENSMUSG00000017756	0.64	0.57	0.59	0.54	0.47	0.62	0.58	0.57	0.54	0.51	0.562	0.564	Slc12a7	13	73763697	73816743	protein_coding	KNOWN
ENSMUSG00000017760	0.46	0.46	0.47	0.49	0.45	0.47	0.48	0.48	0.48	0.49	0.466	0.48	Ctsa	2	164832873	164841032	protein_coding	KNOWN
ENSMUSG00000017764	0.52	0.56	0.54	0.55	0.51	0.51	0.51	0.5	0.54	0.54	0.536	0.52	Zswim1	2	164822686	164826871	protein_coding	KNOWN
ENSMUSG00000017765	0.48	0.5	0.47	0.47	0.48	0.47	0.47	0.53	0.45	0.46	0.48	0.476	Slc12a4	8	105943590	105966115	protein_coding	KNOWN
ENSMUSG00000017774	0.46	0.46	0.41	0.44	0.47	0.4	0.52	0.45	0.51	0.46	0.448	0.468	Myo1c	11	75650504	75673910	protein_coding	KNOWN
ENSMUSG00000017776	0.49	0.49	0.47	0.49	0.5	0.48	0.48	0.5	0.48	0.5	0.488	0.488	Crk	11	75679259	75706908	protein_coding	KNOWN
ENSMUSG00000017778	0.41	0.38	0.43	0.42	0.35	0.36	0.4	0.34	0.39	0.35	0.398	0.368	Cox7c	13	86044816	86046904	protein_coding	KNOWN
ENSMUSG00000017801	0.46	0.45	0.49	0.45	0.45	0.47	0.47	0.45	0.48	0.43	0.46	0.46	Mlx	11	101087277	101092207	protein_coding	KNOWN
ENSMUSG00000017831	0.48	0.5	0.47	0.49	0.52	0.46	0.5	0.47	0.49	0.5	0.492	0.484	Rab5a	17	53479234	53507671	protein_coding	KNOWN
ENSMUSG00000017837	0.51	0.47	0.53	0.52	0.54	0.54	0.51	0.54	0.54	0.54	0.514	0.534	Nkiras2	11	100619244	100627607	protein_coding	KNOWN
ENSMUSG00000017858	0.43	0.45	0.49	0.43	0.49	0.48	0.42	0.44	0.42	0.44	0.458	0.44	Ift52	2	163017354	163046141	protein_coding	KNOWN
ENSMUSG00000017929	0.48	0.55	0.51	0.47	0.51	0.48	0.53	0.53	0.55	0.5	0.504	0.518	B4galt5	2	167298444	167349183	protein_coding	KNOWN
ENSMUSG00000017999	0.49	0.53	0.52	0.51	0.53	0.47	0.53	0.5	0.48	0.51	0.516	0.498	Ddx27	2	167015193	167034947	protein_coding	KNOWN
ENSMUSG00000018001	0.58	0.54	0.57	0.6	0.53	0.5	0.53	0.55	0.5	0.54	0.564	0.524	Cyth3	5	143622447	143710250	protein_coding	KNOWN
ENSMUSG00000018008	0.46	0.43	0.4	0.48	0.46	0.42	0.47	0.46	0.43	0.43	0.446	0.442	Cyth4	15	78597047	78622019	protein_coding	KNOWN
ENSMUSG00000018012	0.56	0.55	0.48	0.57	0.55	0.6	0.53	0.52	0.56	0.58	0.542	0.558	Rac3	11	120721470	120723969	protein_coding	KNOWN
ENSMUSG00000018040	0.53	0.52	0.56	0.59	0.51	0.54	0.56	0.53	0.53	0.55	0.542	0.542	Rrp7a	15	83113433	83122801	protein_coding	KNOWN
ENSMUSG00000018042	0.73	0.72	0.84	0.87	0.87	0.77	0.77	0.88	0.82	0.74	0.806	0.796	Cyb5r3	15	83153494	83172592	protein_coding	KNOWN
ENSMUSG00000018068	0.56	0.55	0.56	0.67	0.56	0.55	0.57	0.53	0.53	0.58	0.58	0.552	Ints2	11	86210681	86257575	protein_coding	KNOWN
ENSMUSG00000018076	0.49	0.45	0.55	0.49	0.52	0.5	0.49	0.53	0.53	0.51	0.5	0.512	Med13l	5	118560719	118765435	protein_coding	KNOWN
ENSMUSG00000018102	0.53	0.56	0.54	0.54	0.59	0.55	0.55	0.56	0.56	0.57	0.552	0.558	Hist1h2bc	13	23684199	23692488	protein_coding	KNOWN
ENSMUSG00000018160	0.54	0.58	0.55	0.57	0.55	0.5	0.52	0.57	0.51	0.55	0.558	0.53	Med1	11	98152154	98193293	protein_coding	KNOWN
ENSMUSG00000018166	0.54	0.48	0.52	0.49	0.59	0.55	0.54	0.52	0.56	0.54	0.524	0.542	Erbb3	10	128567523	128589652	protein_coding	KNOWN
ENSMUSG00000018167	0.56	0.53	0.57	0.46	0.53	0.51	0.52	0.53	0.52	0.55	0.53	0.526	Stard3	11	98358368	98381112	protein_coding	KNOWN
ENSMUSG00000018169	0.33	0.33	0.43	0.4	0.35	0.39	0.55	0.43	0.42	0.4	0.368	0.438	Mfng	15	78755882	78773475	protein_coding	KNOWN
ENSMUSG00000018171	0.49	0.54	0.52	0.49	0.45	0.51	0.49	0.5	0.49	0.5	0.498	0.498	Vmp1	11	86583865	86683836	protein_coding	KNOWN
ENSMUSG00000018189	0.53	0.45	0.49	0.51	0.53	0.51	0.5	0.48	0.51	0.5	0.502	0.5	Uchl5	1	143777278	143807466	protein_coding	KNOWN
ENSMUSG00000018196	0.53	0.46	0.51	0.52	0.42	0.49	0.5	0.49	0.5	0.51	0.488	0.498	Glrx2	1	143739029	143749676	protein_coding	KNOWN
ENSMUSG00000018199	0.57	0.56	0.56	0.56	0.56	0.56	0.57	0.56	0.54	0.57	0.562	0.56	Trove2	1	143750790	143777068	protein_coding	KNOWN
ENSMUSG00000018209	0.5	0.49	0.5	0.53	0.52	0.49	0.49	0.5	0.5	0.52	0.508	0.5	Stk4	2	164070322	164155524	protein_coding	KNOWN
ENSMUSG00000018217	0.45	0.47	0.47	0.45	0.44	0.41	0.48	0.45	0.42	0.42	0.456	0.436	Pmp22	11	63128982	63159547	protein_coding	KNOWN
ENSMUSG00000018239	0.45	0.48	0.41	0.51	0.5	0.55	0.49	0.52	0.49	0.47	0.47	0.504	Zcchc10	11	53324679	53333301	protein_coding	KNOWN
ENSMUSG00000018286	0.53	0.54	0.57	0.53	0.54	0.55	0.6	0.55	0.56	0.54	0.542	0.56	Psmb6	11	70525367	70527858	protein_coding	KNOWN
ENSMUSG00000018293	0.46	0.5	0.45	0.5	0.47	0.5	0.51	0.49	0.47	0.46	0.476	0.486	Pfn1	11	70651850	70654644	protein_coding	KNOWN
ENSMUSG00000018322	0.58	0.58	0.51	0.56	0.58	0.58	0.54	0.58	0.57	0.55	0.562	0.564	Tomm34	2	164053540	164071169	protein_coding	KNOWN
ENSMUSG00000018326	0.6	0.6	0.58	0.63	0.6	0.58	0.58	0.6	0.6	0.58	0.602	0.588	Ywhab	2	163994960	164018588	protein_coding	KNOWN
ENSMUSG00000018334	0.53	0.5	0.49	0.54	0.53	0.54	0.52	0.54	0.5	0.51	0.518	0.522	Ksr1	11	79013440	79146407	protein_coding	KNOWN
ENSMUSG00000018339	0.54	0.58	0.5	0.57	0.61	0.53	0.52	0.56	0.51	0.55	0.56	0.534	Gpx3	11	54902453	54910377	protein_coding	KNOWN
ENSMUSG00000018340	0.58	0.59	0.55	0.6	0.54	0.56	0.6	0.57	0.56	0.57	0.572	0.572	Anxa6	11	54979108	55033445	protein_coding	KNOWN
ENSMUSG00000018341	0.56	0.63	0.55	0.66	0.6	0.57	0.6	0.56	0.53	0.63	0.6	0.578	Il12rb2	6	67291318	67376188	protein_coding	KNOWN
ENSMUSG00000018362	0.53	0.47	0.63	0.53	0.53	0.6	0.47	0.5	0.44	0.49	0.538	0.5	Kpna2	11	106988629	106999541	protein_coding	KNOWN
ENSMUSG00000018363	0.54	0.49	0.5	0.46	0.47	0.52	0.48	0.51	0.51	0.49	0.492	0.502	Smurf2	11	106820066	106920715	protein_coding	KNOWN
ENSMUSG00000018372	0.57	0.42	0.57	0.52	0.58	0.58	0.61	0.51	0.52	0.49	0.532	0.542	Ccdc45	11	106789252	106819930	protein_coding	KNOWN
ENSMUSG00000018377	0.5	0.52	0.48	0.53	0.52	0.51	0.47	0.5	0.48	0.52	0.51	0.496	Vezf1	11	88068279	88084729	protein_coding	KNOWN
ENSMUSG00000018378	0.46	0.49	0.48	0.48	0.51	0.49	0.5	0.48	0.52	0.47	0.484	0.492	Cuedc1	11	88099146	88194140	protein_coding	KNOWN
ENSMUSG00000018379	0.52	0.5	0.57	0.51	0.58	0.5	0.5	0.52	0.52	0.52	0.536	0.512	Srsf1	11	88047373	88053755	protein_coding	KNOWN
ENSMUSG00000018387	0.54	0.59	0.48	0.2	0.58	0.49	0.5	0.59	0.5	0.55	0.478	0.526	Shroom1	11	53457205	53467766	protein_coding	KNOWN
ENSMUSG00000018395	0.55	0.55	0.55	0.73	0.55	0.54	0.55	0.54	0.54	0.55	0.586	0.544	Kif3a	11	53567379	53601967	protein_coding	KNOWN
ENSMUSG00000018398	0.56	0.55	0.55	0.57	0.58	0.57	0.56	0.57	0.57	0.58	0.562	0.57	2020-09-08	11	53519257	53549565	protein_coding	KNOWN
ENSMUSG00000018405	0.47	0.49	0.46	0.5	0.6	0.45	0.45	0.52	0.45	0.49	0.504	0.472	Mrm1	11	84813061	84819515	protein_coding	KNOWN
ENSMUSG00000018411	0.49	0.49	0.49	0.49	0.49	0.5	0.49	0.49	0.49	0.5	0.49	0.494	Mapt	11	104231390	104332090	protein_coding	KNOWN
ENSMUSG00000018412	0.48	0.5	0.46	0.48	0.45	0.48	0.47	0.47	0.46	0.49	0.474	0.474	Kansl1	11	104333229	104468861	protein_coding	NOVEL
ENSMUSG00000018415	0.52	0.51	0.5	0.52	0.54	0.5	0.52	0.51	0.55	0.49	0.518	0.514	4933439F18Rik	11	60417145	60450927	protein_coding	NOVEL
ENSMUSG00000018417	0.47	0.44	0.51	0.46	0.45	0.47	0.4	0.49	0.42	0.47	0.466	0.45	Myo1b	1	51749765	51916071	protein_coding	KNOWN
ENSMUSG00000018425	0.46	0.44	0.49	0.43	0.51	0.46	0.48	0.44	0.45	0.52	0.466	0.47	Dhx40	11	86768846	86807696	protein_coding	KNOWN
ENSMUSG00000018427	0.5	0.49	0.51	0.47	0.48	0.49	0.5	0.5	0.49	0.5	0.49	0.496	Ypel2	11	86936425	86993707	protein_coding	KNOWN
ENSMUSG00000018442	0.55	0.58	0.5	0.59	0.48	0.55	0.54	0.56	0.57	0.53	0.54	0.55	Derl2	11	71007164	71019841	protein_coding	KNOWN
ENSMUSG00000018446	0.49	0.47	0.53	0.49	0.52	0.5	0.54	0.5	0.5	0.48	0.5	0.504	C1qbp	11	70977836	70983026	protein_coding	KNOWN
ENSMUSG00000018449	0.42	0.43	0.3	0.37	0.44	0.52	0.41	0.43	0.44	0.43	0.392	0.446	Rpain	11	70970213	70977833	protein_coding	KNOWN
ENSMUSG00000018451	0.56	0.56	0.55	0.55	0.55	0.56	0.55	0.56	0.55	0.55	0.554	0.554	6330403K07Rik	11	71031941	71033513	lincRNA	KNOWN
ENSMUSG00000018459	0.5	0.51	0.48	0.49	0.49	0.5	0.52	0.5	0.51	0.49	0.494	0.504	Slc13a3	2	165405028	165473230	protein_coding	KNOWN
ENSMUSG00000018470	0.48	0.5	0.49	0.49	0.5	0.5	0.51	0.51	0.52	0.5	0.492	0.508	Kcnab3	11	69326258	69333042	protein_coding	KNOWN
ENSMUSG00000018474	0.5	0.51	0.5	0.51	0.52	0.5	0.51	0.51	0.51	0.51	0.508	0.508	Chd3	11	69343273	69369406	protein_coding	KNOWN
ENSMUSG00000018476	0.49	0.49	0.49	0.56	0.49	0.48	0.48	0.5	0.51	0.5	0.504	0.494	Kdm6b	11	69398508	69413675	protein_coding	KNOWN
ENSMUSG00000018481	0.48	0.48	0.47	0.46	0.47	0.48	0.5	0.5	0.49	0.49	0.472	0.492	Appbp2	11	85187262	85235130	protein_coding	KNOWN
ENSMUSG00000018500	0.37	0.37	0.42	0.31	0.51	0.37	0.36	0.38	0.34	0.37	0.396	0.364	Adora2b	11	62248984	62266453	protein_coding	KNOWN
ENSMUSG00000018501	0.53	0.54	0.53	0.59	0.55	0.55	0.55	0.55	0.56	0.56	0.548	0.554	Ncor1	11	62316426	62458541	protein_coding	KNOWN
ENSMUSG00000018507	0.5	0.51	0.5	0.46	0.56	0.5	0.52	0.55	0.49	0.5	0.506	0.512	Trpv2	11	62574486	62600515	protein_coding	KNOWN
ENSMUSG00000018509	0.51	0.49	0.51	0.43	0.46	0.5	0.48	0.46	0.49	0.52	0.48	0.49	Cenpv	11	62524946	62539261	protein_coding	KNOWN
ENSMUSG00000018537	0.48	0.47	0.56	0.51	0.51	0.55	0.51	0.55	0.5	0.53	0.506	0.528	Pcgf2	11	97688823	97700497	protein_coding	KNOWN
ENSMUSG00000018541	0.45	0.47	0.43	0.44	0.55	0.42	0.47	0.49	0.46	0.45	0.468	0.458	Cwc25	11	97745481	97766556	protein_coding	KNOWN
ENSMUSG00000018547	0.5	0.48	0.46	0.52	0.51	0.49	0.5	0.46	0.49	0.5	0.494	0.488	Pip4k2b	11	97715157	97744704	protein_coding	KNOWN
ENSMUSG00000018548	0.59	0.58	0.58	0.58	0.55	0.59	0.59	0.6	0.6	0.58	0.576	0.592	Trim37	11	87127077	87220683	protein_coding	KNOWN
ENSMUSG00000018567	0.52	0.55	0.52	0.53	0.52	0.55	0.52	0.53	0.52	0.54	0.528	0.532	Gabarap	11	69991143	69994951	protein_coding	KNOWN
ENSMUSG00000018574	0.52	0.5	0.51	0.52	0.5	0.53	0.46	0.55	0.44	0.5	0.51	0.496	Acadvl	11	70010183	70015411	protein_coding	KNOWN
ENSMUSG00000018581	0.36	0.41	0.39	0.39	0.42	0.39	0.43	0.39	0.42	0.44	0.394	0.414	Dnahc11	12	117877982	118199043	protein_coding	KNOWN
ENSMUSG00000018583	0.5	0.53	0.47	0.49	0.51	0.53	0.54	0.53	0.48	0.52	0.5	0.52	G3bp1	11	55469685	55504838	protein_coding	KNOWN
ENSMUSG00000018585	0.48	0.52	0.48	0.49	0.46	0.46	0.5	0.48	0.45	0.43	0.486	0.464	Atox1	11	55446641	55461239	protein_coding	KNOWN
ENSMUSG00000018589	0.2	0.35	0.24	0.24	0.28	0.45	0.43	0.63	0.31	0.4	0.262	0.444	Glra2	X	165129017	165327393	protein_coding	KNOWN
ENSMUSG00000018593	0.5	0.49	0.48	0.51	0.49	0.49	0.49	0.49	0.49	0.49	0.494	0.49	Sparc	11	55394500	55420080	protein_coding	KNOWN
ENSMUSG00000018599	0.41	0.46	0.33	0.45	0.37	0.42	0.47	0.5	0.41	0.44	0.404	0.448	Smcr7	11	60728398	60732951	protein_coding	KNOWN
ENSMUSG00000018634	0.57	0.57	0.57	0.62	0.6	0.58	0.61	0.6	0.57	0.61	0.586	0.594	Crhr1	11	104132855	104175523	protein_coding	KNOWN
ENSMUSG00000018651	0.48	0.42	0.45	0.44	0.49	0.42	0.49	0.44	0.43	0.43	0.456	0.442	Tada2a	11	84078920	84129600	protein_coding	KNOWN
ENSMUSG00000018659	0.59	0.62	0.6	0.58	0.62	0.62	0.64	0.61	0.59	0.61	0.602	0.614	Pnpo	11	96937825	96943986	protein_coding	KNOWN
ENSMUSG00000018661	0.54	0.52	0.54	0.53	0.55	0.51	0.52	0.52	0.55	0.54	0.536	0.528	Cog1	11	113649169	113667054	protein_coding	KNOWN
ENSMUSG00000018666	0.52	0.51	0.58	0.51	0.47	0.44	0.45	0.51	0.53	0.52	0.518	0.49	Cbx1	11	96789127	96808640	protein_coding	KNOWN
ENSMUSG00000018669	0.47	0.45	0.45	0.51	0.52	0.54	0.5	0.46	0.46	0.44	0.48	0.48	Cdk5rap3	11	96907426	96916496	protein_coding	KNOWN
ENSMUSG00000018677	0.49	0.5	0.52	0.48	0.51	0.52	0.52	0.53	0.52	0.53	0.5	0.524	Slc25a39	11	102402985	102407946	protein_coding	KNOWN
ENSMUSG00000018707	0.5	0.5	0.5	0.47	0.47	0.48	0.48	0.49	0.49	0.49	0.488	0.486	Dync1h1	12	110601452	110666945	protein_coding	KNOWN
ENSMUSG00000018736	0.45	0.46	0.46	0.52	0.57	0.49	0.5	0.45	0.49	0.53	0.492	0.492	Ndel1	11	68821434	68871858	protein_coding	KNOWN
ENSMUSG00000018740	0.55	0.57	0.58	0.59	0.51	0.52	0.63	0.58	0.65	0.52	0.56	0.58	Slc25a35	11	68968131	68974365	protein_coding	KNOWN
ENSMUSG00000018750	0.56	0.55	0.56	0.57	0.52	0.51	0.53	0.54	0.54	0.56	0.552	0.536	Zbtb4	11	69765912	69784023	protein_coding	KNOWN
ENSMUSG00000018761	0.49	0.47	0.47	0.47	0.51	0.48	0.47	0.48	0.47	0.46	0.482	0.472	Mpdu1	11	69656697	69662642	protein_coding	KNOWN
ENSMUSG00000018765	0.52	0.51	0.49	0.55	0.49	0.51	0.53	0.53	0.48	0.52	0.512	0.514	Fxr2	11	69632990	69653297	protein_coding	KNOWN
ENSMUSG00000018770	0.48	0.5	0.48	0.49	0.49	0.49	0.48	0.49	0.48	0.48	0.488	0.484	Atp5g3	2	73908447	73911326	protein_coding	KNOWN
ENSMUSG00000018796	0.52	0.51	0.57	0.55	0.54	0.52	0.54	0.5	0.52	0.5	0.538	0.516	Acsl1	8	46471041	46536051	protein_coding	KNOWN
ENSMUSG00000018800	0.48	0.48	0.49	0.47	0.5	0.49	0.47	0.49	0.49	0.5	0.484	0.488	Abca5	11	110269369	110337716	protein_coding	KNOWN
ENSMUSG00000018809	0.59	0.55	0.54	0.56	0.57	0.56	0.56	0.48	0.56	0.53	0.562	0.538	Smyd4	11	75348433	75405705	protein_coding	KNOWN
ENSMUSG00000018820	0.48	0.47	0.44	0.49	0.51	0.46	0.49	0.5	0.48	0.51	0.478	0.488	Zfyve27	19	42163951	42194590	protein_coding	KNOWN
ENSMUSG00000018821	0.59	0.58	0.52	0.58	0.59	0.53	0.54	0.55	0.58	0.57	0.572	0.554	Avpi1	19	42123273	42129059	protein_coding	KNOWN
ENSMUSG00000018822	0.49	0.53	0.6	0.49	0.57	0.51	0.66	0.55	0.49	0.49	0.536	0.54	Sfrp5	19	42197971	42202252	protein_coding	KNOWN
ENSMUSG00000018830	0.13	0.17	0.19	0.16	0.37	0.2	0.2	0.21	0.21	0.18	0.204	0.2	Myh11	16	14194527	14291408	protein_coding	KNOWN
ENSMUSG00000018844	0.29	0.12	0.21	0.32	0.66	0.24	0.28	0.37	0.29	0.25	0.32	0.286	Fndc8	11	82892124	82900801	protein_coding	KNOWN
ENSMUSG00000018846	0.54	0.55	0.55	0.54	0.52	0.52	0.52	0.54	0.53	0.53	0.54	0.528	Pank3	11	35769484	35791285	protein_coding	KNOWN
ENSMUSG00000018848	0.54	0.53	0.57	0.56	0.63	0.54	0.56	0.51	0.53	0.57	0.566	0.542	Rars	11	35808381	35834506	protein_coding	KNOWN
ENSMUSG00000018849	0.5	0.49	0.51	0.48	0.52	0.48	0.48	0.5	0.52	0.48	0.5	0.492	Wwc1	11	35838400	35980527	protein_coding	KNOWN
ENSMUSG00000018858	0.46	0.44	0.49	0.44	0.44	0.42	0.49	0.45	0.44	0.44	0.454	0.448	Ict1	11	115403752	115412674	protein_coding	KNOWN
ENSMUSG00000018861	0.46	0.37	0.5	0.56	0.51	0.46	0.49	0.48	0.49	0.65	0.48	0.514	Fdxr	11	115268024	115277050	protein_coding	KNOWN
ENSMUSG00000018865	0.5	0.5	0.52	0.52	0.47	0.51	0.51	0.51	0.5	0.51	0.502	0.508	Sult4a1	15	84076097	84105754	protein_coding	KNOWN
ENSMUSG00000018882	0.45	0.52	0.49	0.5	0.53	0.52	0.48	0.53	0.51	0.54	0.498	0.516	Mrpl45	11	97315716	97329920	protein_coding	KNOWN
ENSMUSG00000018900	0.52	0.46	0.62	0.47	0.5	0.53	0.55	0.5	0.54	0.53	0.514	0.53	Slc22a5	11	53864542	53891660	protein_coding	KNOWN
ENSMUSG00000018906	0.54	0.44	0.4	0.41	0.49	0.42	0.5	0.45	0.42	0.4	0.456	0.438	P4ha2	11	54100095	54131665	protein_coding	KNOWN
ENSMUSG00000018909	0.48	0.5	0.49	0.5	0.49	0.5	0.49	0.5	0.49	0.5	0.492	0.496	Arrb1	7	99535466	99606771	protein_coding	KNOWN
ENSMUSG00000018920	0.5	0.69	0.59	0.38	0.52	0.52	0.38	0.51	0.58	0.5	0.536	0.498	Cxcl16	11	70453983	70459984	protein_coding	KNOWN
ENSMUSG00000018921	0.51	0.49	0.46	0.45	0.53	0.48	0.47	0.53	0.48	0.52	0.488	0.496	Pelp1	11	70392883	70410031	protein_coding	KNOWN
ENSMUSG00000018923	0.48	0.69	0.62	0.63	0.6	0.51	0.54	0.52	0.54	0.49	0.604	0.52	Med11	11	70451919	70453727	protein_coding	KNOWN
ENSMUSG00000018931	0.47	0.46	0.52	0.46	0.52	0.45	0.48	0.49	0.47	0.45	0.486	0.468	Gm16515	11	60902246	60914750	protein_coding	KNOWN
ENSMUSG00000018965	0.79	0.78	0.79	0.68	0.8	0.85	0.85	0.82	0.81	0.85	0.768	0.836	Ywhah	5	33018816	33027966	protein_coding	KNOWN
ENSMUSG00000018974	0.52	0.5	0.53	0.53	0.5	0.55	0.5	0.52	0.52	0.55	0.516	0.528	Sart3	5	113742446	113771649	protein_coding	KNOWN
ENSMUSG00000018983	0.45	0.38	0.67	0.75	0.55	0.33	0.4	0.47	0.39	0.47	0.56	0.412	E2f2	4	136172394	136196057	protein_coding	KNOWN
ENSMUSG00000018995	0.6	0.57	0.64	0.55	0.44	0.55	0.56	0.6	0.58	0.6	0.56	0.578	Nars2	7	96951505	97064761	protein_coding	KNOWN
ENSMUSG00000018999	0.51	0.51	0.52	0.53	0.52	0.5	0.51	0.48	0.52	0.53	0.518	0.508	Slc35b4	6	34153380	34177111	protein_coding	KNOWN
ENSMUSG00000019027	0.4	0.38	0.36	0.5	0.52	0.4	0.39	0.52	0.51	0.54	0.432	0.472	Dnahc1	14	31260375	31323896	protein_coding	KNOWN
ENSMUSG00000019039	0.59	0.56	0.58	0.55	0.56	0.56	0.59	0.59	0.58	0.51	0.568	0.566	Dalrd3	9	108569892	108572771	protein_coding	KNOWN
ENSMUSG00000019054	0.51	0.5	0.5	0.5	0.49	0.5	0.49	0.51	0.49	0.5	0.5	0.498	Fis1	5	136953275	136966234	protein_coding	KNOWN
ENSMUSG00000019055	0.56	0.62	0.67	0.63	0.67	0.65	0.61	0.62	0.65	0.63	0.63	0.632	Plod1	4	147909753	147936767	protein_coding	KNOWN
ENSMUSG00000019080	0.35	0.5	0.38	0.51	0.56	0.52	0.42	0.39	0.35	0.28	0.46	0.392	Mfsd3	15	76701542	76704239	protein_coding	KNOWN
ENSMUSG00000019082	0.45	0.45	0.43	0.44	0.46	0.47	0.47	0.47	0.44	0.45	0.446	0.46	Slc25a22	7	141429739	141437892	protein_coding	KNOWN
ENSMUSG00000019087	0.5	0.5	0.5	0.5	0.5	0.5	0.5	0.5	0.5	0.5	0.5	0.5	Atp6ap1	X	74297097	74304721	protein_coding	KNOWN
ENSMUSG00000019122	0.09	0.12	0.09	0.12	0.41	0.07	0.1	0.11	0.1	0.1	0.166	0.096	Ccl9	11	83572919	83578636	protein_coding	KNOWN
ENSMUSG00000019124	0.5	0.49	0.49	0.49	0.5	0.51	0.49	0.5	0.51	0.5	0.494	0.502	Scrn1	6	54505890	54566489	protein_coding	KNOWN
ENSMUSG00000019132	0.48	0.52	0.5	0.47	0.46	0.51	0.5	0.5	0.51	0.49	0.486	0.502	BC005537	13	24801657	24814013	protein_coding	KNOWN
ENSMUSG00000019139	0.48	0.44	0.47	0.52	0.47	0.49	0.45	0.43	0.47	0.46	0.476	0.46	Isyna1	8	70594481	70597288	protein_coding	KNOWN
ENSMUSG00000019143	0.56	0.52	0.52	0.6	0.47	0.55	0.54	0.52	0.5	0.54	0.534	0.53	Hars2	18	36783008	36792562	protein_coding	KNOWN
ENSMUSG00000019146	0.47	0.47	0.49	0.5	0.55	0.46	0.48	0.49	0.51	0.53	0.496	0.494	Cacng2	15	77991748	78120028	protein_coding	KNOWN
ENSMUSG00000019158	0.4	0.5	0.57	0.65	0.13	0.5	0.29	0.44	0.28	0.46	0.45	0.394	Tmem160	7	16452779	16455489	protein_coding	KNOWN
ENSMUSG00000019179	0.51	0.5	0.52	0.51	0.49	0.5	0.49	0.5	0.51	0.5	0.506	0.5	Mdh2	5	135778480	135790398	protein_coding	KNOWN
ENSMUSG00000019188	0.23	0.26	0.25	0.18	0.29	0.77	0.77	0.74	0.75	0.75	0.242	0.756	H13	2	152669461	152708670	protein_coding	KNOWN
ENSMUSG00000019189	0.51	0.52	0.51	0.52	0.51	0.5	0.49	0.49	0.52	0.49	0.514	0.498	Rnf145	11	44518964	44565520	protein_coding	KNOWN
ENSMUSG00000019194	0.5	0.53	0.5	0.53	0.53	0.51	0.49	0.51	0.48	0.51	0.518	0.5	Scn1b	7	31116525	31126945	protein_coding	KNOWN
ENSMUSG00000019210	0.51	0.51	0.5	0.49	0.5	0.51	0.51	0.51	0.51	0.51	0.502	0.51	Atp6v1e1	6	120795245	120822685	protein_coding	KNOWN
ENSMUSG00000019232	0.44	0.45	0.47	0.49	0.5	0.44	0.45	0.46	0.45	0.43	0.47	0.446	Agxt2l1	3	130617448	130635750	protein_coding	KNOWN
ENSMUSG00000019235	0.52	0.53	0.61	0.53	0.58	0.55	0.53	0.51	0.53	0.53	0.554	0.53	Rps6kl1	12	85135596	85151264	protein_coding	KNOWN
ENSMUSG00000019254	0.45	0.47	0.45	0.46	0.45	0.46	0.46	0.43	0.45	0.49	0.456	0.458	Ppp1r12c	7	4481520	4501680	protein_coding	KNOWN
ENSMUSG00000019256	0.43	0.52	0.41	0.55	0.55	0.46	0.51	0.52	0.45	0.53	0.492	0.494	Ahr	12	35497974	35535038	protein_coding	KNOWN
ENSMUSG00000019261	0.46	0.51	0.48	0.51	0.51	0.47	0.5	0.48	0.45	0.46	0.494	0.472	Mtap1s	8	70905974	70917526	protein_coding	KNOWN
ENSMUSG00000019295	0.49	0.46	0.4	0.47	0.6	0.56	0.47	0.5	0.49	0.5	0.484	0.504	Tmem129	5	33653216	33657977	protein_coding	KNOWN
ENSMUSG00000019297	0.58	0.69	0.55	0.51	0.56	0.5	0.55	0.5	0.53	0.55	0.578	0.526	2610027L16Rik	14	55745693	55755500	protein_coding	KNOWN
ENSMUSG00000019302	0.45	0.44	0.44	0.41	0.43	0.43	0.45	0.44	0.43	0.43	0.434	0.436	Atp6v0a1	11	101009452	101063719	protein_coding	KNOWN
ENSMUSG00000019320	0.3	0.5	0.25	0.2	0.53	0.34	0.46	0.43	0.47	0.47	0.356	0.434	Noxo1	17	24696234	24700529	protein_coding	KNOWN
ENSMUSG00000019326	0.23	0.74	0.79	0.43	0.51	0.38	0.26	0.33	0.37	0.6	0.54	0.388	Aoc3	11	101330605	101341938	protein_coding	KNOWN
ENSMUSG00000019370	0.51	0.5	0.5	0.52	0.51	0.51	0.51	0.5	0.51	0.51	0.508	0.508	Calm3	7	16915379	16924114	protein_coding	KNOWN
ENSMUSG00000019428	0.52	0.51	0.49	0.52	0.5	0.51	0.51	0.51	0.51	0.5	0.508	0.508	Fkbp8	8	70527724	70535328	protein_coding	KNOWN
ENSMUSG00000019432	0.48	0.53	0.57	0.5	0.48	0.5	0.49	0.52	0.52	0.51	0.512	0.508	Ddx39b	17	35241746	35253707	protein_coding	KNOWN
ENSMUSG00000019433	0.5	0.5	0.49	0.49	0.49	0.49	0.55	0.49	0.49	0.52	0.494	0.508	Gipc1	8	83652678	83664788	protein_coding	KNOWN
ENSMUSG00000019437	0.46	0.53	0.55	0.54	0.47	0.47	0.56	0.46	0.51	0.45	0.51	0.49	Tlcd1	11	78176711	78181909	protein_coding	KNOWN
ENSMUSG00000019461	0.43	0.47	0.34	0.44	0.44	0.44	0.51	0.43	0.53	0.38	0.424	0.458	Plscr3	11	69846376	69852058	protein_coding	KNOWN
ENSMUSG00000019470	0.51	0.58	0.46	0.5	0.42	0.53	0.54	0.54	0.54	0.53	0.494	0.536	Xab2	8	3608421	3621316	protein_coding	KNOWN
ENSMUSG00000019471	0.5	0.5	0.5	0.5	0.47	0.51	0.52	0.51	0.51	0.5	0.494	0.51	Cdc37	9	21138541	21149906	protein_coding	KNOWN
ENSMUSG00000019478	0.48	0.48	0.48	0.55	0.55	0.54	0.49	0.54	0.56	0.51	0.508	0.528	Rab4a	8	123805985	123835287	protein_coding	KNOWN
ENSMUSG00000019487	0.42	0.49	0.33	0.58	0.52	0.48	0.43	0.44	0.37	0.45	0.468	0.434	Trip10	17	57249451	57263697	protein_coding	KNOWN
ENSMUSG00000019494	0.52	0.47	0.55	0.51	0.48	0.53	0.53	0.51	0.52	0.54	0.506	0.526	Cops6	5	138161071	138164646	protein_coding	KNOWN
ENSMUSG00000019505	0.48	0.48	0.46	0.49	0.45	0.48	0.47	0.49	0.5	0.48	0.472	0.484	Ubb	11	62551171	62553213	protein_coding	KNOWN
ENSMUSG00000019518	0.49	0.36	0.16	0.48	0.36	0.52	0.33	0.44	0.5	0.49	0.37	0.456	Ap4m1	5	138172002	138178708	protein_coding	KNOWN
ENSMUSG00000019528	0.51	0.52	0.5	0.52	0.46	0.48	0.51	0.51	0.53	0.53	0.502	0.512	Gyg	3	20122084	20155317	protein_coding	KNOWN
ENSMUSG00000019558	0.17	0.31	0.34	0.29	0.3	0.48	0.47	0.6	0.33	0.34	0.282	0.444	Slc6a8	X	73673150	73682502	protein_coding	KNOWN
ENSMUSG00000019564	0.57	0.53	0.5	0.46	0.54	0.47	0.56	0.54	0.52	0.52	0.52	0.522	Arid3a	10	79927043	79955018	protein_coding	KNOWN
ENSMUSG00000019577	0.34	0.5	0.41	0.35	0.44	0.37	0.43	0.36	0.46	0.34	0.408	0.392	Pdk4	6	5483351	5496309	protein_coding	KNOWN
ENSMUSG00000019578	0.49	0.48	0.54	0.5	0.51	0.48	0.5	0.5	0.51	0.5	0.504	0.498	Ubxn6	17	56067045	56075028	protein_coding	KNOWN
ENSMUSG00000019579	0.55	0.59	0.56	0.55	0.63	0.55	0.6	0.54	0.56	0.6	0.576	0.57	D17Wsu104e	17	56175744	56183920	protein_coding	KNOWN
ENSMUSG00000019590	0.54	0.55	0.56	0.51	0.55	0.52	0.55	0.53	0.5	0.51	0.542	0.522	Cyb561	11	105933702	105953336	protein_coding	KNOWN
ENSMUSG00000019659	0.57	0.58	0.55	0.51	0.53	0.49	0.54	0.51	0.55	0.5	0.548	0.518	Ccdc12	9	110656503	110711590	protein_coding	KNOWN
ENSMUSG00000019689	0.58	0.5	0.49	0.47	0.52	0.5	0.46	0.52	0.46	0.48	0.512	0.484	1110001J03Rik	6	38533502	38539449	protein_coding	KNOWN
ENSMUSG00000019699	0.56	0.49	0.48	0.56	0.48	0.51	0.51	0.54	0.51	0.51	0.514	0.516	Akt3	1	177020073	177258203	protein_coding	KNOWN
ENSMUSG00000019710	0.54	0.48	0.51	0.46	0.57	0.5	0.49	0.44	0.49	0.52	0.512	0.488	Mrpl24	3	87919506	87923672	protein_coding	KNOWN
ENSMUSG00000019715	0.62	0.59	0.61	0.58	0.49	0.58	0.59	0.59	0.57	0.55	0.578	0.576	Gle1	2	29935426	29960371	protein_coding	KNOWN
ENSMUSG00000019718	0.3	0.29	0.36	0.35	0.47	0.47	0.44	0.39	0.37	0.32	0.354	0.398	2810055F11Rik	12	72073428	72085439	protein_coding	KNOWN
ENSMUSG00000019726	0.54	0.51	0.5	0.5	0.53	0.52	0.51	0.49	0.52	0.49	0.516	0.506	Lyst	13	13590409	13777440	protein_coding	KNOWN
ENSMUSG00000019731	0.45	0.52	0.46	0.56	0.28	0.36	0.5	0.34	0.41	0.39	0.454	0.4	Slc35e1	8	72480641	72492614	protein_coding	KNOWN
ENSMUSG00000019737	0.57	0.54	0.76	0.47	0.52	0.62	0.53	0.61	0.45	0.66	0.572	0.574	AI428936	7	30314807	30319046	protein_coding	KNOWN
ENSMUSG00000019761	0.3	0.38	0.45	0.25	0.23	0.38	0.22	0.36	0.37	0.33	0.322	0.332	Krt10	11	99385254	99389364	protein_coding	KNOWN
ENSMUSG00000019763	0.67	0.68	0.65	0.65	0.67	0.69	0.65	0.61	0.67	0.62	0.664	0.648	Rmnd1	10	4401915	4432388	protein_coding	KNOWN
ENSMUSG00000019768	0.3	0.35	0.56	0.36	0.45	0.32	0.32	0.52	0.5	0.42	0.404	0.416	Esr1	10	4611593	5005614	protein_coding	KNOWN
ENSMUSG00000019769	0.44	0.42	0.51	0.46	0.45	0.44	0.47	0.45	0.44	0.44	0.456	0.448	Syne1	10	5020203	5069063	protein_coding	KNOWN
ENSMUSG00000019772	0.6	0.6	0.59	0.58	0.55	0.66	0.61	0.58	0.61	0.58	0.584	0.608	Vip	10	5639218	5647614	protein_coding	KNOWN
ENSMUSG00000019773	0.53	0.43	0.09	0.61	0.59	0.71	0.66	0.35	0.61	0.58	0.45	0.582	Fbxo5	10	5799160	5805600	protein_coding	KNOWN
ENSMUSG00000019774	0.53	0.67	0.48	0.57	0.71	0.59	0.59	0.57	0.57	0.56	0.592	0.576	Mtrf1l	10	5811887	5823910	protein_coding	KNOWN
ENSMUSG00000019775	0.52	0.49	0.48	0.51	0.52	0.51	0.51	0.51	0.51	0.51	0.504	0.51	Rgs17	10	5825663	5922400	protein_coding	KNOWN
ENSMUSG00000019777	0.51	0.52	0.49	0.5	0.47	0.5	0.51	0.5	0.5	0.5	0.498	0.502	Hdac2	10	36974544	37001889	protein_coding	KNOWN
ENSMUSG00000019782	0.51	0.58	0.58	0.46	0.53	0.59	0.56	0.53	0.55	0.5	0.532	0.546	Rwdd1	10	33996555	34019624	protein_coding	KNOWN
ENSMUSG00000019785	0.55	0.59	0.53	0.66	0.64	0.6	0.53	0.54	0.55	0.53	0.594	0.55	Clvs2	10	33512286	33624769	protein_coding	KNOWN
ENSMUSG00000019787	0.52	0.49	0.49	0.54	0.42	0.45	0.5	0.48	0.49	0.52	0.492	0.488	Trdn	10	33083483	33476709	protein_coding	KNOWN
ENSMUSG00000019789	0.47	0.45	0.5	0.5	0.54	0.48	0.48	0.5	0.49	0.46	0.492	0.482	Hey2	10	30832359	30842801	protein_coding	KNOWN
ENSMUSG00000019790	0.51	0.54	0.48	0.54	0.54	0.51	0.49	0.5	0.49	0.52	0.522	0.502	Stxbp5	10	9755547	9901079	protein_coding	KNOWN
ENSMUSG00000019791	0.31	0.37	0.57	0.49	0.59	0.52	0.41	0.61	0.56	0.38	0.466	0.496	Hint3	10	30608141	30618479	protein_coding	KNOWN
ENSMUSG00000019792	0.44	0.47	0.47	0.38	0.19	0.5	0.5	0.57	0.5	0.5	0.39	0.514	Trmt11	10	30534225	30600749	protein_coding	KNOWN
ENSMUSG00000019794	0.52	0.49	0.53	0.57	0.57	0.43	0.46	0.56	0.58	0.55	0.536	0.516	Katna1	10	7726000	7763150	protein_coding	KNOWN
ENSMUSG00000019795	0.48	0.48	0.48	0.51	0.53	0.47	0.49	0.48	0.49	0.49	0.496	0.484	Pcmt1	10	7629373	7681136	protein_coding	KNOWN
ENSMUSG00000019796	0.47	0.44	0.46	0.46	0.44	0.46	0.47	0.46	0.47	0.46	0.454	0.464	Lrp11	10	7589800	7625483	protein_coding	KNOWN
ENSMUSG00000019797	0.46	0.46	0.5	0.47	0.45	0.46	0.48	0.46	0.49	0.43	0.468	0.464	1700021F05Rik	10	43525121	43540994	protein_coding	KNOWN
ENSMUSG00000019802	0.53	0.53	0.56	0.58	0.52	0.58	0.52	0.55	0.54	0.55	0.544	0.548	Sec63	10	42761496	42832514	protein_coding	KNOWN
ENSMUSG00000019803	0.51	0.51	0.47	0.55	0.54	0.49	0.55	0.52	0.47	0.54	0.516	0.514	Nr2e1	10	42561963	42583632	protein_coding	KNOWN
ENSMUSG00000019806	0.53	0.51	0.48	0.52	0.52	0.54	0.52	0.53	0.53	0.52	0.512	0.528	Aig1	10	13647054	13868980	protein_coding	KNOWN
ENSMUSG00000019808	0.44	0.52	0.43	0.34	0.39	0.5	0.51	0.54	0.44	0.49	0.424	0.496	Adat2	10	13552894	13563376	protein_coding	KNOWN
ENSMUSG00000019809	0.53	0.59	0.48	0.53	0.45	0.49	0.5	0.5	0.51	0.51	0.516	0.502	Pex3	10	13523842	13553142	protein_coding	KNOWN
ENSMUSG00000019810	0.4	0.41	0.4	0.44	0.38	0.41	0.41	0.42	0.4	0.4	0.406	0.408	Fuca2	10	13499540	13519035	protein_coding	KNOWN
ENSMUSG00000019813	0.63	0.45	0.5	0.57	0.46	0.69	0.54	0.43	0.47	0.51	0.522	0.528	Cep57l1	10	41718840	41809607	protein_coding	KNOWN
ENSMUSG00000019814	0.53	0.44	0.54	0.45	0.51	0.47	0.42	0.45	0.45	0.5	0.494	0.458	Ltv1	10	13178640	13193137	protein_coding	KNOWN
ENSMUSG00000019817	0.99	0.98	0.98	0.99	0.98	0.01	0.02	0.01	0.01	0.01	0.984	0.012	Plagl1	10	13090691	13131694	protein_coding	KNOWN
ENSMUSG00000019818	0.47	0.5	0.49	0.49	0.58	0.49	0.51	0.46	0.51	0.46	0.506	0.486	Cd164	10	41519500	41531042	protein_coding	KNOWN
ENSMUSG00000019820	0.43	0.42	0.42	0.42	0.48	0.45	0.45	0.43	0.42	0.43	0.434	0.436	Utrn	10	12382188	12861735	protein_coding	KNOWN
ENSMUSG00000019822	0.5	0.57	0.48	0.46	0.58	0.55	0.48	0.5	0.5	0.58	0.518	0.522	Smpd2	10	41485642	41490369	protein_coding	KNOWN
ENSMUSG00000019823	0.42	0.43	0.39	0.49	0.35	0.45	0.4	0.47	0.45	0.44	0.416	0.442	Mical1	10	41476314	41487032	protein_coding	KNOWN
ENSMUSG00000019826	0.45	0.51	0.51	0.55	0.42	0.47	0.51	0.52	0.5	0.43	0.488	0.486	Zbtb24	10	41450396	41465571	protein_coding	KNOWN
ENSMUSG00000019828	0.5	0.49	0.5	0.52	0.52	0.51	0.5	0.51	0.51	0.51	0.506	0.508	Grm1	10	10686059	11082356	protein_coding	KNOWN
ENSMUSG00000019831	0.47	0.46	0.46	0.45	0.52	0.48	0.49	0.47	0.46	0.48	0.472	0.476	Wasf1	10	40883475	40938570	protein_coding	KNOWN
ENSMUSG00000019832	0.38	0.37	0.44	0.49	0.47	0.37	0.44	0.39	0.56	0.37	0.43	0.426	Rab32	10	10545011	10558233	protein_coding	KNOWN
ENSMUSG00000019837	0.55	0.54	0.47	0.45	0.48	0.53	0.53	0.56	0.52	0.55	0.498	0.538	Gtf3c6	10	40249203	40257665	protein_coding	KNOWN
ENSMUSG00000019838	0.53	0.67	0.41	0.65	0.71	0.53	0.49	0.58	0.53	0.56	0.594	0.538	Slc16a10	10	40033535	40142254	protein_coding	KNOWN
ENSMUSG00000019841	0.5	0.49	0.47	0.48	0.47	0.51	0.5	0.49	0.5	0.48	0.482	0.496	Rev3l	10	39732118	39875211	protein_coding	KNOWN
ENSMUSG00000019842	0.62	0.71	0.61	0.61	0.5	0.75	0.63	0.55	0.61	0.61	0.61	0.63	Traf3ip2	10	39612934	39655307	protein_coding	KNOWN
ENSMUSG00000019843	0.5	0.49	0.48	0.49	0.48	0.49	0.49	0.49	0.49	0.49	0.488	0.49	Fyn	10	39368855	39565381	protein_coding	KNOWN
ENSMUSG00000019845	0.43	0.6	0.43	0.37	0.42	0.38	0.32	0.33	0.4	0.39	0.45	0.364	Tube1	10	39134023	39151058	protein_coding	KNOWN
ENSMUSG00000019846	0.52	0.54	0.49	0.54	0.46	0.5	0.43	0.46	0.52	0.46	0.51	0.474	Lama4	10	38965515	39110188	protein_coding	KNOWN
ENSMUSG00000019849	0.53	0.51	0.59	0.52	0.53	0.52	0.47	0.52	0.51	0.57	0.536	0.518	Prep	10	45067206	45158997	protein_coding	KNOWN
ENSMUSG00000019851	0.33	0.36	0.34	0.33	0.49	0.38	0.35	0.37	0.28	0.34	0.37	0.344	Perp	10	18845071	18857073	protein_coding	KNOWN
ENSMUSG00000019852	0.51	0.51	0.44	0.73	0.53	0.51	0.52	0.51	0.53	0.51	0.544	0.516	D10Bwg1379e	10	18588011	18743758	protein_coding	KNOWN
ENSMUSG00000019853	0.61	0.63	0.51	0.48	0.64	0.5	0.45	0.49	0.46	0.46	0.574	0.472	Hebp2	10	18540123	18546076	protein_coding	KNOWN
ENSMUSG00000019854	0.51	0.55	0.55	0.5	0.5	0.51	0.5	0.53	0.51	0.54	0.522	0.518	Reps1	10	18055861	18125155	protein_coding	KNOWN
ENSMUSG00000019857	0.55	0.6	0.47	0.58	0.49	0.53	0.45	0.47	0.5	0.48	0.538	0.486	Asf1a	10	53596961	53609213	protein_coding	KNOWN
ENSMUSG00000019863	0.55	0.58	0.55	0.55	0.6	0.56	0.54	0.53	0.53	0.56	0.566	0.544	Qrsl1	10	43874188	43901745	protein_coding	KNOWN
ENSMUSG00000019864	0.49	0.52	0.49	0.41	0.47	0.47	0.5	0.52	0.48	0.49	0.476	0.492	Rtn4ip1	10	43901807	43947862	protein_coding	KNOWN
ENSMUSG00000019865	0.29	0.23	0.4	0.69	0.25	0.48	0.41	0.55	0.54	0.5	0.372	0.496	Nmbr	10	14760221	14770583	protein_coding	KNOWN
ENSMUSG00000019866	0.79	0.83	0.77	0.82	0.7	0.82	0.77	0.77	0.76	0.83	0.782	0.79	Aim1	10	43950307	44004846	protein_coding	KNOWN
ENSMUSG00000019868	0.48	0.51	0.53	0.49	0.48	0.49	0.43	0.4	0.42	0.46	0.498	0.44	Vta1	10	14654755	14705560	protein_coding	KNOWN
ENSMUSG00000019872	0.45	0.53	0.41	0.46	0.48	0.51	0.44	0.51	0.49	0.49	0.466	0.488	Smpdl3a	10	57794335	57811830	protein_coding	KNOWN
ENSMUSG00000019873	0.53	0.51	0.51	0.48	0.5	0.54	0.53	0.52	0.51	0.51	0.506	0.522	Reep3	10	67009189	67096988	protein_coding	KNOWN
ENSMUSG00000019874	0.55	0.53	0.55	0.56	0.57	0.55	0.51	0.55	0.53	0.55	0.552	0.538	Fabp7	10	57784881	57788450	protein_coding	KNOWN
ENSMUSG00000019876	0.52	0.47	0.41	0.49	0.5	0.47	0.51	0.48	0.5	0.5	0.478	0.492	Pkib	10	57631981	57741112	protein_coding	KNOWN
ENSMUSG00000019877	0.5	0.49	0.5	0.49	0.5	0.5	0.5	0.5	0.5	0.5	0.496	0.5	Serinc1	10	57515774	57532530	protein_coding	KNOWN
ENSMUSG00000019878	0.44	0.4	0.44	0.45	0.54	0.46	0.44	0.41	0.44	0.49	0.454	0.448	Hsf2	10	57486385	57513133	protein_coding	KNOWN
ENSMUSG00000019880	0.48	0.48	0.43	0.45	0.46	0.5	0.45	0.51	0.46	0.48	0.46	0.48	Rspo3	10	29453109	29535867	protein_coding	KNOWN
ENSMUSG00000019883	0.49	0.43	0.47	0.53	0.47	0.47	0.52	0.47	0.5	0.51	0.478	0.494	Echdc1	10	29313166	29346661	protein_coding	KNOWN
ENSMUSG00000019889	0.51	0.48	0.51	0.53	0.45	0.46	0.47	0.51	0.5	0.5	0.496	0.488	Ptprk	10	28074820	28597397	protein_coding	KNOWN
ENSMUSG00000019890	0.26	0.36	0.43	0.25	0.38	0.42	0.29	0.3	0.29	0.35	0.336	0.33	Nts	10	102481760	102490418	protein_coding	KNOWN
ENSMUSG00000019892	0.46	0.39	0.6	0.75	0.53	0.34	0.22	0.49	0.3	0.39	0.546	0.348	Lrriq1	10	103063198	103236322	protein_coding	KNOWN
ENSMUSG00000019897	0.54	0.59	0.64	0.55	0.5	0.57	0.57	0.54	0.6	0.58	0.564	0.572	Ccdc59	10	105841067	105847833	protein_coding	KNOWN
ENSMUSG00000019899	0.62	0.67	0.59	0.7	0.57	0.66	0.57	0.65	0.61	0.61	0.63	0.62	Lama2	10	26981288	27616942	protein_coding	KNOWN
ENSMUSG00000019906	0.52	0.53	0.5	0.51	0.51	0.52	0.51	0.51	0.51	0.51	0.514	0.512	Lin7a	10	107271843	107425143	protein_coding	KNOWN
ENSMUSG00000019907	0.5	0.49	0.55	0.48	0.56	0.49	0.48	0.51	0.52	0.54	0.516	0.508	Ppp1r12a	10	108162400	108277575	protein_coding	KNOWN
ENSMUSG00000019916	0.55	0.52	0.53	0.55	0.57	0.58	0.6	0.59	0.57	0.55	0.544	0.578	P4ha1	10	59323296	59373304	protein_coding	KNOWN
ENSMUSG00000019917	0.41	0.5	0.26	0.56	0.6	0.51	0.41	0.42	0.4	0.32	0.466	0.412	2020-09-10	10	59164113	59221847	protein_coding	KNOWN
ENSMUSG00000019920	0.58	0.55	0.55	0.56	0.56	0.55	0.57	0.55	0.55	0.53	0.56	0.55	Lims1	10	58323466	58424691	protein_coding	KNOWN
ENSMUSG00000019923	0.54	0.52	0.52	0.55	0.55	0.53	0.55	0.54	0.54	0.54	0.536	0.54	Zwint	10	72654845	72674964	protein_coding	KNOWN
ENSMUSG00000019927	0.55	0.54	0.55	0.54	0.57	0.52	0.53	0.55	0.53	0.55	0.55	0.536	Ube2d1	10	71254980	71285262	protein_coding	KNOWN
ENSMUSG00000019935	0.44	0.39	0.78	0.55	0.17	0.46	0.25	0.4	0.59	0.45	0.466	0.43	Slc17a8	10	89574020	89621253	protein_coding	KNOWN
ENSMUSG00000019943	0.51	0.53	0.52	0.55	0.52	0.52	0.52	0.52	0.53	0.52	0.526	0.522	Atp2b1	10	98915152	99026143	protein_coding	KNOWN
ENSMUSG00000019945	0.51	0.56	0.63	0.32	0.26	0.49	0.46	0.45	0.59	0.45	0.456	0.488	1700040L02Rik	10	68430953	68541896	protein_coding	KNOWN
ENSMUSG00000019947	0.63	0.5	0.68	0.56	0.77	0.69	0.63	0.62	0.6	0.47	0.628	0.602	Arid5b	10	68095593	68278726	protein_coding	KNOWN
ENSMUSG00000019948	0.52	0.57	0.54	0.55	0.58	0.49	0.5	0.52	0.5	0.5	0.552	0.502	Actr6	10	89711973	89732295	protein_coding	KNOWN
ENSMUSG00000019951	0.44	0.44	0.43	0.43	0.42	0.45	0.45	0.44	0.44	0.44	0.432	0.444	Uhrf1bp1l	10	89744991	89819869	protein_coding	KNOWN
ENSMUSG00000019952	0.52	0.6	0.53	0.44	0.51	0.47	0.59	0.56	0.58	0.58	0.52	0.556	Poc1b	10	99107036	99198074	protein_coding	KNOWN
ENSMUSG00000019960	0.46	0.48	0.54	0.49	0.54	0.47	0.47	0.5	0.54	0.5	0.502	0.496	Dusp6	10	99263231	99267488	protein_coding	KNOWN
ENSMUSG00000019961	0.49	0.46	0.5	0.43	0.46	0.43	0.49	0.48	0.49	0.49	0.468	0.476	Tmpo	10	91147571	91171582	protein_coding	KNOWN
ENSMUSG00000019966	0.48	0.51	0.54	0.48	0.51	0.49	0.49	0.5	0.48	0.51	0.504	0.494	Kitl	10	100015630	100100413	protein_coding	KNOWN
ENSMUSG00000019969	0.49	0.49	0.49	0.52	0.56	0.51	0.51	0.5	0.51	0.51	0.51	0.508	Psen1	12	83688203	83735199	protein_coding	KNOWN
ENSMUSG00000019970	0.9	0.86	0.85	0.89	0.88	0.86	0.87	0.88	0.92	0.87	0.876	0.88	Sgk1	10	21882184	21999903	protein_coding	KNOWN
ENSMUSG00000019971	0.57	0.43	0.54	0.42	0.63	0.45	0.55	0.48	0.49	0.52	0.518	0.498	Cep290	10	100488289	100573655	protein_coding	KNOWN
ENSMUSG00000019975	0.5	0.47	0.52	0.47	0.51	0.48	0.49	0.46	0.5	0.46	0.494	0.478	Ikbip	10	91082940	91102607	protein_coding	KNOWN
ENSMUSG00000019986	0.54	0.54	0.5	0.55	0.51	0.47	0.5	0.49	0.48	0.48	0.528	0.484	Ahi1	10	20952547	21080428	protein_coding	KNOWN
ENSMUSG00000019988	0.54	0.6	0.55	0.63	0.59	0.73	0.46	0.43	0.59	0.6	0.582	0.562	Nedd1	10	92684746	92722420	protein_coding	KNOWN
ENSMUSG00000019989	0.91	1	0.88	0.93	0.65	0.7	0.7	0.76	0.76	0.94	0.874	0.772	Enpp3	10	24773814	24836195	protein_coding	KNOWN
ENSMUSG00000019990	0.51	0.55	0.49	0.59	0.48	0.58	0.54	0.56	0.57	0.55	0.524	0.56	Pde7b	10	20398004	20725078	protein_coding	KNOWN
ENSMUSG00000019996	0.54	0.49	0.54	0.56	0.57	0.53	0.53	0.57	0.49	0.48	0.54	0.52	Mtap7	10	20148471	20281589	protein_coding	KNOWN
ENSMUSG00000019997	0.46	0.48	0.44	0.44	0.49	0.48	0.46	0.46	0.47	0.44	0.462	0.462	Ctgf	10	24595442	24598683	protein_coding	KNOWN
ENSMUSG00000019998	0.5	0.5	0.52	0.5	0.49	0.53	0.51	0.51	0.51	0.51	0.502	0.514	Stx7	10	24149317	24188959	protein_coding	KNOWN
ENSMUSG00000020000	0.55	0.49	0.54	0.52	0.49	0.49	0.52	0.49	0.46	0.48	0.518	0.488	Moxd1	10	24223517	24302790	protein_coding	KNOWN
ENSMUSG00000020003	0.61	0.62	0.61	0.62	0.67	0.67	0.64	0.63	0.64	0.66	0.626	0.648	Pex7	10	19859929	19907689	protein_coding	KNOWN
ENSMUSG00000020007	0.51	0.54	0.62	0.53	0.46	0.48	0.59	0.59	0.5	0.56	0.532	0.544	Il20ra	10	19712587	19760053	protein_coding	KNOWN
ENSMUSG00000020009	0.44	0.48	0.45	0.39	0.47	0.41	0.46	0.46	0.44	0.41	0.446	0.436	Ifngr1	10	19591949	19610229	protein_coding	KNOWN
ENSMUSG00000020014	0.08	0.12	0.11	0.28	0.32	0.09	0.11	0.13	0.12	0.14	0.182	0.118	Gm872	10	92775619	93081618	protein_coding	KNOWN
ENSMUSG00000020015	0.51	0.5	0.48	0.51	0.49	0.5	0.5	0.49	0.49	0.5	0.498	0.496	Cdk17	10	93160876	93241342	protein_coding	KNOWN
ENSMUSG00000020018	0.52	0.52	0.56	0.54	0.54	0.6	0.48	0.56	0.46	0.52	0.536	0.524	Snrpf	10	93583029	93589706	protein_coding	KNOWN
ENSMUSG00000020019	0.44	0.44	0.43	0.41	0.42	0.44	0.45	0.42	0.45	0.41	0.428	0.434	Ntn4	10	93640681	93747207	protein_coding	KNOWN
ENSMUSG00000020021	0.52	0.59	0.55	0.56	0.48	0.55	0.54	0.49	0.52	0.53	0.54	0.526	Fgd6	10	94036001	94145339	protein_coding	KNOWN
ENSMUSG00000020022	0.55	0.5	0.49	0.54	0.57	0.55	0.58	0.58	0.58	0.58	0.53	0.574	Ndufa12	10	94198955	94221443	protein_coding	KNOWN
ENSMUSG00000020023	0.56	0.53	0.55	0.49	0.56	0.51	0.5	0.52	0.51	0.53	0.538	0.514	Tmcc3	10	94311949	94590956	protein_coding	KNOWN
ENSMUSG00000020024	0.44	0.37	0.41	0.43	0.44	0.38	0.41	0.41	0.45	0.48	0.418	0.426	Ccdc41	10	94688790	94790336	protein_coding	KNOWN
ENSMUSG00000020027	0.47	0.42	0.43	0.42	0.48	0.44	0.45	0.45	0.43	0.44	0.444	0.442	Socs2	10	95385362	95417180	protein_coding	KNOWN
ENSMUSG00000020029	0.54	0.51	0.48	0.52	0.52	0.52	0.5	0.5	0.53	0.5	0.514	0.51	Nudt4	10	95547007	95564167	protein_coding	KNOWN
ENSMUSG00000020032	0.45	0.47	0.46	0.45	0.5	0.44	0.43	0.46	0.44	0.46	0.466	0.446	Nuak1	10	84370905	84440597	protein_coding	KNOWN
ENSMUSG00000020034	0.46	0.45	0.49	0.47	0.46	0.47	0.48	0.49	0.49	0.47	0.466	0.48	Tcp11l2	10	84576626	84614359	protein_coding	KNOWN
ENSMUSG00000020037	0.56	0.39	0.45	0.49	0.62	0.48	0.52	0.54	0.43	0.47	0.502	0.488	Rfx4	10	84756062	84906538	protein_coding	KNOWN
ENSMUSG00000020038	0.54	0.51	0.5	0.54	0.51	0.49	0.53	0.5	0.49	0.49	0.52	0.5	Cry1	10	85131702	85185054	protein_coding	KNOWN
ENSMUSG00000020044	0.54	0.52	0.53	0.53	0.51	0.51	0.51	0.51	0.51	0.53	0.526	0.514	Timp3	10	86300372	86349506	protein_coding	KNOWN
ENSMUSG00000020048	0.5	0.5	0.47	0.48	0.49	0.5	0.51	0.5	0.51	0.51	0.488	0.506	Hsp90b1	10	86690209	86705509	protein_coding	KNOWN
ENSMUSG00000020052	0.63	0.63	0.53	0.52	0.54	0.56	0.7	0.57	0.65	0.52	0.57	0.6	Ascl1	10	87490819	87493660	protein_coding	KNOWN
ENSMUSG00000020053	0.39	0.4	0.39	0.39	0.39	0.41	0.43	0.41	0.41	0.41	0.392	0.414	Igf1	10	87858265	87937042	protein_coding	KNOWN
ENSMUSG00000020056	0.44	0.4	0.46	0.5	0.47	0.38	0.45	0.49	0.38	0.48	0.454	0.436	Ccdc53	10	88201097	88246152	protein_coding	KNOWN
ENSMUSG00000020062	0.22	0.67	1	0.57	0.5	0.55	0.57	0.64	0.89	0.4	0.592	0.61	Slc5a8	10	88885992	88929505	protein_coding	KNOWN
ENSMUSG00000020064	0.5	0.46	0.57	0.41	0.22	0.36	0.25	0.37	0.5	0.5	0.432	0.396	Herc4	10	63243797	63317881	protein_coding	KNOWN
ENSMUSG00000020067	0.29	0.32	0.31	0.26	0.28	0.36	0.28	0.27	0.24	0.36	0.292	0.302	Mypn	10	63115795	63203952	protein_coding	KNOWN
ENSMUSG00000020068	0.19	0.34	0.28	0.16	0.24	0.23	0.21	0.23	0.23	0.24	0.242	0.228	Pbld2	10	63024315	63058813	protein_coding	KNOWN
ENSMUSG00000020069	0.48	0.5	0.48	0.54	0.48	0.47	0.49	0.48	0.51	0.44	0.496	0.478	Hnrnph3	10	63014664	63024217	protein_coding	KNOWN
ENSMUSG00000020070	0.5	0.49	0.51	0.45	0.47	0.51	0.52	0.5	0.5	0.5	0.484	0.506	Rufy2	10	62980223	63017210	protein_coding	KNOWN
ENSMUSG00000020074	0.51	0.48	0.49	0.5	0.47	0.47	0.49	0.49	0.46	0.46	0.49	0.474	Ccar1	10	62743928	62792368	protein_coding	KNOWN
ENSMUSG00000020075	0.48	0.49	0.45	0.47	0.42	0.44	0.51	0.47	0.47	0.47	0.462	0.472	Ddx21	10	62580248	62602298	protein_coding	KNOWN
ENSMUSG00000020076	0.48	0.52	0.52	0.53	0.46	0.56	0.52	0.52	0.5	0.5	0.502	0.52	Ddx50	10	62616023	62651218	protein_coding	KNOWN
ENSMUSG00000020079	0.47	0.46	0.5	0.5	0.5	0.48	0.52	0.54	0.54	0.53	0.486	0.522	Supv3l1	10	62429209	62449738	protein_coding	KNOWN
ENSMUSG00000020080	0.4	0.55	0.7	0.43	0	0.33	0.32	0.52	0.3	0.29	0.416	0.352	Hkdc1	10	62383137	62422491	protein_coding	KNOWN
ENSMUSG00000020085	0.48	0.64	0.49	0.47	0.62	0.54	0.48	0.5	0.44	0.47	0.54	0.486	Aifm2	10	61715263	61739260	protein_coding	KNOWN
ENSMUSG00000020086	0.56	0.56	0.64	0.52	0.52	0.5	0.57	0.59	0.55	0.57	0.56	0.556	H2afy2	10	61738665	61784147	protein_coding	KNOWN
ENSMUSG00000020087	0.53	0.52	0.53	0.5	0.57	0.46	0.44	0.56	0.48	0.48	0.53	0.484	Tysnd1	10	61695514	61702773	protein_coding	KNOWN
ENSMUSG00000020088	0.49	0.49	0.48	0.48	0.5	0.49	0.5	0.49	0.5	0.49	0.488	0.494	Sar1a	10	61680310	61693295	protein_coding	KNOWN
ENSMUSG00000020089	0.52	0.51	0.51	0.54	0.61	0.44	0.43	0.51	0.52	0.53	0.538	0.486	Ppa1	10	61648552	61674168	protein_coding	KNOWN
ENSMUSG00000020091	0.41	0.5	0.49	0.54	0.37	0.47	0.46	0.46	0.42	0.45	0.462	0.452	Eif4ebp2	10	61432497	61452669	protein_coding	KNOWN
ENSMUSG00000020092	0.49	0.45	0.5	0.52	0.6	0.51	0.51	0.54	0.47	0.53	0.512	0.512	X99384	10	61319657	61383523	protein_coding	KNOWN
ENSMUSG00000020097	0.51	0.5	0.5	0.5	0.52	0.51	0.5	0.54	0.51	0.52	0.506	0.516	Sgpl1	10	61098642	61147703	protein_coding	KNOWN
ENSMUSG00000020098	0.5	0.42	0.33	0.45	0.33	0.44	0.56	0.46	0.43	0.43	0.406	0.464	Pcbd1	10	61089343	61094328	protein_coding	KNOWN
ENSMUSG00000020099	0.48	0.47	0.43	0.46	0.51	0.5	0.48	0.49	0.52	0.49	0.47	0.496	Unc5b	10	60762610	60831581	protein_coding	KNOWN
ENSMUSG00000020100	0.43	0.46	0.44	0.33	0.35	0.42	0.47	0.43	0.43	0.43	0.402	0.436	Slc29a3	10	60712072	60752794	protein_coding	KNOWN
ENSMUSG00000020102	0.39	0.43	0.42	0.39	0.48	0.41	0.43	0.44	0.4	0.4	0.422	0.416	Slc16a7	10	125226464	125328963	protein_coding	KNOWN
ENSMUSG00000020105	0.48	0.26	0.36	0.48	0.26	0.43	0.64	0.48	0.39	0.53	0.368	0.494	Lrig3	10	125966219	126015359	protein_coding	KNOWN
ENSMUSG00000020107	0.53	0.6	0.56	0.53	0.5	0.52	0.53	0.55	0.56	0.53	0.544	0.538	Anapc16	10	59987909	60003112	protein_coding	KNOWN
ENSMUSG00000020108	0.52	0.53	0.52	0.48	0.49	0.54	0.51	0.5	0.49	0.51	0.508	0.51	Ddit4	10	59949675	59951770	protein_coding	KNOWN
ENSMUSG00000020109	0.46	0.51	0.5	0.53	0.46	0.51	0.49	0.52	0.5	0.46	0.492	0.496	Dnajb12	10	59879556	59899302	protein_coding	KNOWN
ENSMUSG00000020111	0.51	0.53	0.49	0.5	0.51	0.52	0.5	0.5	0.52	0.5	0.508	0.508	Micu1	10	59702477	59864132	protein_coding	KNOWN
ENSMUSG00000020114	0.47	0.56	0.36	0.53	0.45	0.5	0.42	0.48	0.46	0.49	0.474	0.47	Cand1	10	119199255	119240055	protein_coding	KNOWN
ENSMUSG00000020115	0.52	0.5	0.47	0.51	0.53	0.5	0.51	0.51	0.52	0.47	0.506	0.502	Tbk1	10	121546455	121586794	protein_coding	KNOWN
ENSMUSG00000020116	0.51	0.46	0.45	0.48	0.48	0.46	0.47	0.53	0.52	0.52	0.476	0.5	Pno1	11	17203198	17211568	protein_coding	KNOWN
ENSMUSG00000020120	0.51	0.51	0.51	0.52	0.51	0.55	0.51	0.54	0.53	0.54	0.512	0.534	Plek	11	16971206	17052381	protein_coding	KNOWN
ENSMUSG00000020121	0.51	0.49	0.54	0.5	0.56	0.53	0.49	0.54	0.51	0.51	0.52	0.516	Srgap1	10	121780991	122047315	protein_coding	KNOWN
ENSMUSG00000020122	0.45	0.37	0.45	0.42	0.44	0.48	0.44	0.45	0.43	0.42	0.426	0.444	Egfr	11	16752203	16918158	protein_coding	KNOWN
ENSMUSG00000020123	0.22	0.1	0.37	0.31	0.43	0.23	0.34	0.37	0.24	0.46	0.286	0.328	Avpr1a	10	122448499	122453453	protein_coding	KNOWN
ENSMUSG00000020124	0.54	0.53	0.51	0.47	0.54	0.5	0.49	0.5	0.51	0.5	0.518	0.5	Usp15	10	123113244	123196935	protein_coding	KNOWN
ENSMUSG00000020128	0.51	0.52	0.49	0.54	0.52	0.53	0.54	0.52	0.54	0.53	0.516	0.532	Vps54	11	21239281	21321136	protein_coding	KNOWN
ENSMUSG00000020130	0.51	0.55	0.58	0.51	0.56	0.55	0.5	0.51	0.5	0.5	0.542	0.512	Tbc1d15	10	115197877	115251493	protein_coding	KNOWN
ENSMUSG00000020132	0.5	0.48	0.53	0.49	0.5	0.49	0.48	0.52	0.52	0.5	0.5	0.502	Rab21	10	115289863	115315591	protein_coding	KNOWN
ENSMUSG00000020133	0.57	0.59	0.57	0.56	0.53	0.54	0.59	0.57	0.58	0.57	0.564	0.57	2310011J03Rik	10	80318254	80320537	protein_coding	KNOWN
ENSMUSG00000020135	0.51	0.52	0.5	0.52	0.57	0.56	0.53	0.54	0.52	0.51	0.524	0.532	Apc2	10	80295977	80318263	protein_coding	KNOWN
ENSMUSG00000020137	0.57	0.54	0.57	0.56	0.52	0.59	0.56	0.55	0.54	0.56	0.552	0.56	Thap2	10	115369966	115384435	protein_coding	KNOWN
ENSMUSG00000020140	0.52	0.5	0.5	0.55	0.52	0.52	0.52	0.5	0.53	0.51	0.518	0.516	Lgr5	10	115450311	115587780	protein_coding	KNOWN
ENSMUSG00000020142	0.51	0.53	0.49	0.51	0.47	0.51	0.5	0.51	0.52	0.49	0.502	0.506	Slc1a4	11	20302180	20332713	protein_coding	KNOWN
ENSMUSG00000020143	0.53	0.57	0.19	0.55	0.46	0.51	0.51	0.48	0.43	0.44	0.46	0.474	Dock2	11	34226815	34783892	protein_coding	KNOWN
ENSMUSG00000020149	0.47	0.49	0.49	0.48	0.51	0.5	0.5	0.49	0.5	0.49	0.488	0.496	Rab1	11	20201432	20226856	protein_coding	KNOWN
ENSMUSG00000020151	0.56	0.54	0.61	0.62	0.52	0.56	0.57	0.57	0.61	0.58	0.57	0.578	Ptprr	10	116018213	116274932	protein_coding	KNOWN
ENSMUSG00000020152	0.5	0.52	0.52	0.53	0.53	0.52	0.53	0.52	0.52	0.52	0.52	0.522	Actr2	11	20062304	20112913	protein_coding	KNOWN
ENSMUSG00000020153	0.49	0.47	0.52	0.49	0.53	0.47	0.51	0.51	0.5	0.49	0.5	0.496	Ndufs7	10	80249121	80256794	protein_coding	KNOWN
ENSMUSG00000020154	0.57	0.56	0.58	0.56	0.48	0.54	0.53	0.55	0.54	0.51	0.55	0.534	Ptprb	10	116301374	116389538	protein_coding	KNOWN
ENSMUSG00000020156	0.63	0.56	0.58	0.58	0.67	0.58	0.52	0.54	0.53	0.54	0.604	0.542	Mum1	10	80226434	80243903	protein_coding	KNOWN
ENSMUSG00000020160	0.44	0.45	0.42	0.44	0.39	0.44	0.41	0.47	0.45	0.45	0.428	0.444	Meis1	11	18880430	19018958	protein_coding	KNOWN
ENSMUSG00000020170	0.56	0.52	0.53	0.51	0.54	0.52	0.52	0.54	0.53	0.51	0.532	0.524	Frs2	10	117070129	117148474	protein_coding	KNOWN
ENSMUSG00000020171	0.49	0.48	0.51	0.49	0.51	0.48	0.51	0.44	0.49	0.46	0.496	0.476	Yeats4	10	117215142	117224507	protein_coding	KNOWN
ENSMUSG00000020175	0.51	0.57	0.53	0.43	0.58	0.53	0.52	0.48	0.59	0.52	0.524	0.528	Rab36	10	75037058	75054748	protein_coding	KNOWN
ENSMUSG00000020176	0.86	0.9	0.81	0.88	0.69	0.16	0.12	0.11	0.15	0.17	0.828	0.142	Grb10	11	11930508	12038683	protein_coding	KNOWN
ENSMUSG00000020178	0.51	0.62	0.64	0.57	0.69	0.5	0.55	0.58	0.56	0.57	0.606	0.552	Adora2a	10	75316943	75334788	protein_coding	KNOWN
ENSMUSG00000020180	0.55	0.55	0.49	0.51	0.48	0.49	0.54	0.55	0.53	0.53	0.516	0.528	Snrpd3	10	75518042	75535440	protein_coding	KNOWN
ENSMUSG00000020181	0.56	0.58	0.58	0.56	0.51	0.55	0.54	0.54	0.5	0.54	0.558	0.534	Nav3	10	109682660	110000219	protein_coding	KNOWN
ENSMUSG00000020190	0.47	0.48	0.55	0.45	0.48	0.46	0.45	0.5	0.49	0.49	0.486	0.478	Mknk2	10	80665332	80671976	protein_coding	KNOWN
ENSMUSG00000020193	0.26	0.35	0.44	0.3	0.25	0.42	0.47	0.4	0.35	0.46	0.32	0.42	Zpbp	11	11279626	11462408	protein_coding	KNOWN
ENSMUSG00000020196	0.52	0.5	0.49	0.53	0.46	0.5	0.48	0.49	0.5	0.49	0.5	0.492	Cabin1	10	75646110	75764357	protein_coding	KNOWN
ENSMUSG00000020198	0.49	0.5	0.48	0.48	0.44	0.48	0.49	0.49	0.47	0.48	0.478	0.482	Ap3d1	10	80706978	80742211	protein_coding	KNOWN
ENSMUSG00000020205	0.51	0.52	0.5	0.58	0.51	0.58	0.53	0.5	0.51	0.48	0.524	0.52	Phlda1	10	111506286	111508645	protein_coding	KNOWN
ENSMUSG00000020211	0.48	0.47	0.41	0.52	0.52	0.45	0.47	0.49	0.56	0.48	0.48	0.49	Sf3a2	10	80798198	80804924	protein_coding	KNOWN
ENSMUSG00000020216	0.42	0.28	0.53	0.36	0.43	0.4	0.29	0.4	0.42	0.38	0.404	0.378	Jsrp1	10	80808496	80811885	protein_coding	KNOWN
ENSMUSG00000020219	0.56	0.56	0.49	0.52	0.6	0.48	0.51	0.56	0.56	0.52	0.546	0.526	Timm13	10	80899450	80900969	protein_coding	KNOWN
ENSMUSG00000020220	0.54	0.47	0.47	0.57	0.5	0.51	0.5	0.5	0.51	0.52	0.51	0.508	Vps13d	4	144972626	145194995	protein_coding	KNOWN
ENSMUSG00000020224	0.44	0.51	0.55	0.52	0.58	0.49	0.52	0.52	0.51	0.52	0.52	0.512	Llph	10	120227070	120232071	protein_coding	KNOWN
ENSMUSG00000020228	0.55	0.45	0.39	0.51	0.52	0.53	0.54	0.54	0.55	0.51	0.484	0.534	Helb	10	120083608	120112987	protein_coding	KNOWN
ENSMUSG00000020230	0.51	0.53	0.56	0.51	0.53	0.49	0.51	0.54	0.53	0.53	0.528	0.52	Prmt2	10	76207222	76237865	protein_coding	KNOWN
ENSMUSG00000020231	0.51	0.44	0.53	0.48	0.59	0.52	0.54	0.53	0.53	0.5	0.51	0.524	Dip2a	10	76259429	76345291	protein_coding	KNOWN
ENSMUSG00000020232	0.63	0.49	0.54	0.56	0.6	0.53	0.39	0.55	0.54	0.51	0.564	0.504	Hmg20b	10	81346048	81350480	protein_coding	KNOWN
ENSMUSG00000020235	0.55	0.51	0.51	0.47	0.5	0.47	0.52	0.47	0.5	0.47	0.508	0.486	Fzr1	10	81366222	81378516	protein_coding	KNOWN
ENSMUSG00000020238	0.48	0.52	0.49	0.48	0.52	0.47	0.53	0.51	0.47	0.49	0.498	0.494	Ncln	10	81486249	81496392	protein_coding	KNOWN
ENSMUSG00000020241	0.62	0.68	0.7	0.64	0.49	0.57	0.58	0.67	0.63	0.62	0.626	0.614	Col6a2	10	76595762	76623630	protein_coding	KNOWN
ENSMUSG00000020246	0.51	0.53	0.52	0.54	0.59	0.49	0.51	0.51	0.5	0.5	0.538	0.502	Hcfc2	10	82696160	82742428	protein_coding	KNOWN
ENSMUSG00000020248	0.5	0.54	0.54	0.54	0.56	0.51	0.53	0.53	0.54	0.52	0.536	0.526	Nfyb	10	82748701	82764144	protein_coding	KNOWN
ENSMUSG00000020250	0.58	0.57	0.57	0.6	0.59	0.56	0.55	0.55	0.56	0.54	0.582	0.552	Txnrd1	10	82859206	82897724	protein_coding	KNOWN
ENSMUSG00000020251	0.59	0.55	0.33	0.69	0.72	0.52	0.66	0.54	0.51	0.49	0.576	0.544	Glt8d2	10	82650433	82690650	protein_coding	KNOWN
ENSMUSG00000020253	0.56	0.62	0.48	0.51	0.54	0.52	0.59	0.62	0.65	0.59	0.542	0.594	Ppm1m	9	106194172	106199746	protein_coding	KNOWN
ENSMUSG00000020255	0.6	0.59	0.52	0.6	0.52	0.57	0.59	0.56	0.57	0.56	0.566	0.57	D10Wsu102e	10	83360221	83368835	protein_coding	KNOWN
ENSMUSG00000020256	0.51	0.51	0.57	0.46	0.48	0.67	0.52	0.55	0.55	0.58	0.506	0.574	Aldh1l2	10	83487450	83534140	protein_coding	KNOWN
ENSMUSG00000020257	0.51	0.55	0.5	0.48	0.48	0.51	0.53	0.51	0.52	0.52	0.504	0.518	Wdr82	9	106170929	106191706	protein_coding	KNOWN
ENSMUSG00000020260	0.44	0.48	0.48	0.48	0.53	0.49	0.45	0.51	0.46	0.47	0.482	0.476	Pofut2	10	77259300	77269586	protein_coding	KNOWN
ENSMUSG00000020261	0.47	0.5	0.46	0.55	0.44	0.5	0.5	0.48	0.49	0.5	0.484	0.494	Slc36a1	11	55204350	55236330	protein_coding	KNOWN
ENSMUSG00000020262	0.51	0.52	0.5	0.5	0.52	0.51	0.51	0.51	0.51	0.52	0.51	0.512	Adarb1	10	77290726	77418270	protein_coding	KNOWN
ENSMUSG00000020263	0.66	0.6	0.62	0.57	0.58	0.63	0.64	0.6	0.61	0.6	0.606	0.616	Appl2	10	83600033	83648738	protein_coding	KNOWN
ENSMUSG00000020264	0.81	0.96	0.84	0.9	0.4	0.85	0.89	0.94	0.84	0.88	0.782	0.88	Slc36a2	11	55158470	55185077	protein_coding	KNOWN
ENSMUSG00000020265	0.51	0.47	0.47	0.5	0.45	0.5	0.49	0.49	0.5	0.49	0.48	0.494	Sumo3	10	77606097	77641543	protein_coding	KNOWN
ENSMUSG00000020267	0.55	0.45	0.46	0.49	0.48	0.5	0.48	0.48	0.55	0.5	0.486	0.502	Hint1	11	54866383	54870501	protein_coding	KNOWN
ENSMUSG00000020272	0.43	0.3	0.33	0.39	0.35	0.39	0.35	0.4	0.36	0.43	0.36	0.386	Stk10	11	32533305	32624587	protein_coding	KNOWN
ENSMUSG00000020273	0.38	0.61	0.38	0.36	0.59	0.36	0.57	0.42	0.53	0.58	0.464	0.492	Papolg	11	23862646	23895253	protein_coding	KNOWN
ENSMUSG00000020275	0.43	0.46	0.37	0.4	0.35	0.41	0.39	0.44	0.41	0.45	0.402	0.42	Rel	11	23741514	23770970	protein_coding	KNOWN
ENSMUSG00000020277	0.42	0.43	0.42	0.43	0.48	0.46	0.42	0.45	0.45	0.43	0.436	0.442	Pfkl	10	77986947	78010083	protein_coding	KNOWN
ENSMUSG00000020280	0.56	0.6	0.55	0.44	0.44	0.55	0.52	0.57	0.45	0.51	0.518	0.52	Pus10	11	23665674	23732876	protein_coding	KNOWN
ENSMUSG00000020282	0.55	0.44	0.51	0.44	0.4	0.53	0.53	0.5	0.52	0.56	0.468	0.528	Rhbdf1	11	32209585	32222300	protein_coding	KNOWN
ENSMUSG00000020283	0.51	0.49	0.53	0.51	0.46	0.51	0.51	0.55	0.54	0.53	0.5	0.528	Pex13	11	23646479	23665959	protein_coding	KNOWN
ENSMUSG00000020284	0.46	0.5	0.47	0.46	0.46	0.49	0.46	0.49	0.48	0.44	0.47	0.472	1810043G02Rik	10	77978524	77986905	protein_coding	KNOWN
ENSMUSG00000020287	0.46	0.44	0.38	0.4	0.52	0.43	0.48	0.48	0.46	0.49	0.44	0.468	Mpg	11	32226505	32232700	protein_coding	KNOWN
ENSMUSG00000020288	0.52	0.56	0.51	0.51	0.62	0.53	0.52	0.47	0.45	0.55	0.544	0.504	Ahsa2	11	23487882	23498030	protein_coding	KNOWN
ENSMUSG00000020289	0.51	0.52	0.49	0.5	0.49	0.45	0.49	0.45	0.46	0.48	0.502	0.466	Nprl3	11	32225628	32267707	protein_coding	KNOWN
ENSMUSG00000020290	0.51	0.52	0.51	0.5	0.4	0.52	0.48	0.49	0.56	0.53	0.488	0.516	Xpo1	11	23256041	23298249	protein_coding	KNOWN
ENSMUSG00000020297	0.5	0.49	0.5	0.51	0.5	0.51	0.51	0.5	0.5	0.5	0.5	0.504	Nsg2	11	32000463	32059202	protein_coding	KNOWN
ENSMUSG00000020300	0.52	0.52	0.49	0.54	0.54	0.53	0.49	0.51	0.5	0.54	0.522	0.514	Cpeb4	11	31872211	31935634	protein_coding	KNOWN
ENSMUSG00000020303	0.49	0.46	0.37	0.56	0.65	0.43	0.48	0.57	0.5	0.54	0.506	0.504	Stc2	11	31357307	31370074	protein_coding	KNOWN
ENSMUSG00000020307	0.54	0.47	0.49	0.55	0.49	0.51	0.57	0.55	0.55	0.51	0.508	0.538	Cdc34	10	79682195	79688394	protein_coding	KNOWN
ENSMUSG00000020308	0.5	0.47	0.53	0.47	0.47	0.49	0.44	0.48	0.5	0.48	0.488	0.478	Gm16517	10	79669410	79676126	protein_coding	KNOWN
ENSMUSG00000020309	0.56	0.54	0.44	0.51	0.6	0.52	0.51	0.48	0.4	0.49	0.53	0.48	Chac2	11	30976707	30986350	protein_coding	KNOWN
ENSMUSG00000020311	0.47	0.46	0.42	0.45	0.5	0.49	0.46	0.49	0.46	0.49	0.46	0.478	Erlec1	11	30930774	30954335	protein_coding	KNOWN
ENSMUSG00000020312	0.5	0.52	0.59	0.5	0.59	0.48	0.51	0.5	0.47	0.49	0.54	0.49	Shc2	10	79617940	79637918	protein_coding	KNOWN
ENSMUSG00000020315	0.52	0.52	0.53	0.5	0.52	0.52	0.52	0.52	0.52	0.52	0.518	0.52	Spnb2	11	30099395	30268175	protein_coding	KNOWN
ENSMUSG00000020319	0.47	0.55	0.51	0.59	0.55	0.49	0.49	0.44	0.49	0.49	0.534	0.48	Wdpcp	11	21572235	21898989	protein_coding	KNOWN
ENSMUSG00000020321	0.54	0.54	0.54	0.53	0.52	0.53	0.53	0.53	0.56	0.53	0.534	0.536	Mdh1	11	21556787	21572367	protein_coding	KNOWN
ENSMUSG00000020326	0.49	0.45	0.49	0.5	0.48	0.49	0.48	0.49	0.49	0.48	0.482	0.486	Ccng1	11	40748552	40755311	protein_coding	KNOWN
ENSMUSG00000020328	0.41	0.54	0.42	0.48	0.41	0.49	0.49	0.53	0.54	0.46	0.452	0.502	Nudcd2	11	40733667	40740046	protein_coding	KNOWN
ENSMUSG00000020333	0.53	0.53	0.51	0.52	0.53	0.5	0.51	0.51	0.52	0.52	0.524	0.512	Acsl6	11	54303798	54364756	protein_coding	KNOWN
ENSMUSG00000020334	0.62	0.63	0.75	0.68	0.66	0.7	0.72	0.7	0.67	0.83	0.668	0.724	Slc22a4	11	53983123	54028090	protein_coding	KNOWN
ENSMUSG00000020335	0.6	0.54	0.45	0.46	0.46	0.58	0.56	0.4	0.48	0.56	0.502	0.516	Zfp354b	11	50921823	50931633	protein_coding	KNOWN
ENSMUSG00000020340	0.49	0.48	0.5	0.47	0.49	0.48	0.49	0.49	0.48	0.49	0.486	0.486	Cyfip2	11	46193850	46312859	protein_coding	KNOWN
ENSMUSG00000020346	0.54	0.54	0.52	0.53	0.54	0.54	0.49	0.51	0.49	0.54	0.534	0.514	Mgat1	11	49244191	49263030	protein_coding	KNOWN
ENSMUSG00000020349	0.5	0.49	0.52	0.5	0.52	0.51	0.52	0.5	0.5	0.51	0.506	0.508	Ppp2ca	11	52098681	52127778	protein_coding	KNOWN
ENSMUSG00000020354	0.53	0.64	0.76	0.11	0.02	0.48	0.49	0.58	0.5	0.39	0.412	0.488	Sgcd	11	46896253	47988969	protein_coding	KNOWN
ENSMUSG00000020357	0.51	0.55	0.51	0.57	0.46	0.51	0.49	0.49	0.53	0.46	0.52	0.496	Flt4	11	49609263	49652739	protein_coding	KNOWN
ENSMUSG00000020358	0.46	0.45	0.5	0.48	0.47	0.48	0.48	0.47	0.47	0.48	0.472	0.476	Hnrnpab	11	51600100	51606847	protein_coding	KNOWN
ENSMUSG00000020359	0.62	0.51	0.44	0.52	0.6	0.55	0.59	0.53	0.6	0.58	0.538	0.57	Agxt2l2	11	51584757	51604489	protein_coding	KNOWN
ENSMUSG00000020361	0.5	0.49	0.51	0.52	0.53	0.51	0.51	0.51	0.5	0.49	0.51	0.504	Hspa4	11	53259814	53300457	protein_coding	KNOWN
ENSMUSG00000020362	0.55	0.55	0.49	0.48	0.51	0.5	0.49	0.5	0.51	0.51	0.516	0.502	Cnot6	11	49671503	49712723	protein_coding	KNOWN
ENSMUSG00000020363	0.56	0.55	0.55	0.64	0.56	0.51	0.55	0.5	0.55	0.51	0.572	0.524	Gfpt2	11	49794178	49838613	protein_coding	KNOWN
ENSMUSG00000020364	0.61	0.64	0.57	0.61	0.66	0.63	0.52	0.63	0.55	0.58	0.618	0.582	Zfp354a	11	51059257	51072799	protein_coding	KNOWN
ENSMUSG00000020366	0.44	0.43	0.43	0.42	0.42	0.43	0.44	0.42	0.45	0.43	0.428	0.434	Mapk9	11	49846751	49886421	protein_coding	KNOWN
ENSMUSG00000020368	0.51	0.49	0.5	0.51	0.51	0.51	0.52	0.52	0.5	0.5	0.504	0.51	Canx	11	50293961	50325673	protein_coding	KNOWN
ENSMUSG00000020372	0.52	0.49	0.53	0.49	0.52	0.52	0.52	0.53	0.51	0.51	0.51	0.518	Gnb2l1	11	48800332	48806434	protein_coding	KNOWN
ENSMUSG00000020374	0.54	0.57	0.54	0.58	0.53	0.51	0.51	0.55	0.56	0.5	0.552	0.526	Rasgef1c	11	49901835	49980994	protein_coding	KNOWN
ENSMUSG00000020375	0.53	0.51	0.53	0.51	0.48	0.49	0.51	0.55	0.54	0.47	0.512	0.512	Rufy1	11	50389286	50431125	protein_coding	KNOWN
ENSMUSG00000020380	0.4	0.49	0.38	0.47	0.41	0.42	0.4	0.43	0.52	0.38	0.43	0.43	Rad50	11	53649519	53707319	protein_coding	KNOWN
ENSMUSG00000020381	0.57	0.6	0.72	0.48	0.75	0.47	0.5	0.55	0.53	0.45	0.624	0.5	3010026O09Rik	11	50174444	50200115	protein_coding	KNOWN
ENSMUSG00000020385	0.46	0.48	0.44	0.48	0.53	0.47	0.45	0.51	0.48	0.53	0.478	0.488	Clk4	11	51261730	51281766	protein_coding	KNOWN
ENSMUSG00000020386	0.52	0.48	0.52	0.5	0.47	0.49	0.51	0.52	0.51	0.5	0.498	0.506	Sar1b	11	51763687	51791925	protein_coding	KNOWN
ENSMUSG00000020388	0.54	0.66	0.49	0.5	0.63	0.53	0.57	0.52	0.38	0.45	0.564	0.49	Pdlim4	11	54054928	54069014	protein_coding	KNOWN
ENSMUSG00000020389	0.57	0.44	0.56	0.57	0.75	0.5	0.59	0.39	0.59	0.39	0.578	0.492	Cdkl3	11	52004221	52089784	protein_coding	KNOWN
ENSMUSG00000020392	0.55	0.53	0.51	0.52	0.55	0.53	0.53	0.53	0.53	0.54	0.532	0.532	Cdkn2aipnl	11	51967661	51977334	protein_coding	KNOWN
ENSMUSG00000020393	0.48	0.53	0.53	0.49	0.53	0.5	0.51	0.53	0.5	0.53	0.512	0.514	Kremen1	11	5191552	5261558	protein_coding	KNOWN
ENSMUSG00000020396	0.58	0.56	0.52	0.52	0.46	0.52	0.54	0.53	0.53	0.57	0.528	0.538	Nefh	11	4938754	4948064	protein_coding	KNOWN
ENSMUSG00000020402	0.51	0.52	0.52	0.54	0.53	0.53	0.52	0.52	0.51	0.52	0.524	0.52	Vdac1	11	52360860	52389397	protein_coding	KNOWN
ENSMUSG00000020409	0.52	0.5	0.54	0.5	0.51	0.51	0.53	0.51	0.5	0.51	0.514	0.512	Slu7	11	43433744	43447981	protein_coding	KNOWN
ENSMUSG00000020411	0.36	0.4	0.25	0.61	0.7	0.52	0.48	0.33	0.48	0.45	0.464	0.452	Nipal4	11	46148155	46166508	protein_coding	KNOWN
ENSMUSG00000020412	0.47	0.48	0.55	0.5	0.58	0.47	0.51	0.45	0.49	0.45	0.516	0.474	Ascc2	11	4637747	4685699	protein_coding	KNOWN
ENSMUSG00000020413	0.5	0.49	0.47	0.46	0.5	0.5	0.48	0.47	0.49	0.48	0.484	0.484	Hus1	11	8993137	9011191	protein_coding	KNOWN
ENSMUSG00000020415	0.99	0.96	0.95	0.95	0.92	0.99	0.96	0.95	0.97	0.97	0.954	0.968	Pttg1	11	43420250	43426251	protein_coding	KNOWN
ENSMUSG00000020420	0.39	0.36	0.34	0.19	0.35	0.39	0.43	0.51	0.49	0.42	0.326	0.448	Zfp607	7	27862557	27879567	protein_coding	KNOWN
ENSMUSG00000020422	0.47	0.44	0.48	0.48	0.49	0.47	0.46	0.46	0.46	0.48	0.472	0.466	Tns3	11	8431652	8664535	protein_coding	KNOWN
ENSMUSG00000020423	0.57	0.51	0.48	0.54	0.46	0.53	0.53	0.53	0.52	0.53	0.512	0.528	Btg2	1	134075170	134079120	protein_coding	KNOWN
ENSMUSG00000020424	0.58	0.13	0.46	0.43	0.33	0.36	0.47	0.55	0.44	0.47	0.386	0.458	Gatsl3	11	4218225	4222409	protein_coding	KNOWN
ENSMUSG00000020427	0.7	0.76	0.7	0.66	0.75	0.72	0.73	0.72	0.74	0.7	0.714	0.722	Igfbp3	11	7206086	7213923	protein_coding	KNOWN
ENSMUSG00000020430	0.62	0.62	0.61	0.6	0.62	0.59	0.6	0.62	0.62	0.65	0.614	0.616	Pes1	11	3963975	3980004	protein_coding	KNOWN
ENSMUSG00000020431	0.48	0.5	0.51	0.51	0.5	0.51	0.5	0.48	0.48	0.5	0.5	0.494	Adcy1	11	7063489	7178506	protein_coding	KNOWN
ENSMUSG00000020432	0.44	0.48	0.39	0.45	0.5	0.5	0.47	0.45	0.45	0.45	0.452	0.464	Tcn2	11	3917192	3932159	protein_coding	KNOWN
ENSMUSG00000020436	0.48	0.48	0.47	0.5	0.49	0.49	0.5	0.49	0.49	0.49	0.484	0.492	Gabrg2	11	41910195	42000857	protein_coding	KNOWN
ENSMUSG00000020440	0.59	0.57	0.47	0.52	0.5	0.55	0.55	0.56	0.55	0.53	0.53	0.548	Arf5	6	28423560	28426602	protein_coding	KNOWN
ENSMUSG00000020441	0.32	0.43	0.46	0.39	0.28	0.48	0.51	0.53	0.49	0.49	0.376	0.5	2310033P09Rik	11	59208321	59210738	protein_coding	KNOWN
ENSMUSG00000020444	0.46	0.46	0.46	0.44	0.45	0.47	0.45	0.49	0.44	0.48	0.454	0.466	Guk1	11	59183875	59192212	protein_coding	KNOWN
ENSMUSG00000020451	0.48	0.47	0.5	0.49	0.48	0.5	0.46	0.49	0.5	0.46	0.484	0.482	Limk2	11	3344256	3409189	protein_coding	KNOWN
ENSMUSG00000020453	0.44	0.49	0.48	0.5	0.42	0.52	0.46	0.48	0.48	0.49	0.466	0.486	Patz1	11	3288874	3309083	protein_coding	KNOWN
ENSMUSG00000020454	0.49	0.51	0.48	0.38	0.44	0.51	0.51	0.44	0.51	0.46	0.46	0.486	Eif4enif1	11	3202392	3244588	protein_coding	KNOWN
ENSMUSG00000020455	0.41	0.48	0.43	0.42	0.45	0.47	0.37	0.47	0.45	0.43	0.438	0.438	Trim11	11	58978093	58991458	protein_coding	KNOWN
ENSMUSG00000020456	0.48	0.49	0.51	0.49	0.5	0.5	0.48	0.49	0.5	0.5	0.494	0.494	Ogdh	11	6291633	6356642	protein_coding	KNOWN
ENSMUSG00000020457	0.47	0.5	0.5	0.5	0.47	0.5	0.5	0.48	0.49	0.49	0.488	0.492	Drg1	11	3187360	3266415	protein_coding	KNOWN
ENSMUSG00000020458	0.5	0.49	0.49	0.48	0.49	0.49	0.5	0.49	0.49	0.49	0.49	0.492	Rtn4	11	29692947	29744331	protein_coding	KNOWN
ENSMUSG00000020460	0.47	0.5	0.5	0.51	0.48	0.5	0.52	0.5	0.49	0.51	0.492	0.504	Rps27a	11	29545846	29548109	protein_coding	KNOWN
ENSMUSG00000020462	0.48	0.5	0.52	0.51	0.52	0.45	0.48	0.42	0.48	0.45	0.506	0.456	Ccdc104	11	29221532	29247409	protein_coding	KNOWN
ENSMUSG00000020463	0.55	0.56	0.55	0.54	0.53	0.56	0.57	0.53	0.53	0.53	0.546	0.544	Smek2	11	29172890	29220797	protein_coding	KNOWN
ENSMUSG00000020464	0.37	0.41	0.31	0.42	0.34	0.36	0.37	0.39	0.34	0.4	0.37	0.372	Pnpt1	11	29130744	29161828	protein_coding	KNOWN
ENSMUSG00000020471	0.39	0.44	0.45	0.45	0.42	0.41	0.49	0.52	0.4	0.46	0.43	0.456	Pold2	11	5872180	5878292	protein_coding	KNOWN
ENSMUSG00000020473	0.49	0.5	0.35	0.44	0.53	0.49	0.45	0.49	0.46	0.51	0.462	0.48	Aebp1	11	5861947	5872088	protein_coding	KNOWN
ENSMUSG00000020474	0.41	0.5	0.55	0.5	0.48	0.43	0.41	0.46	0.36	0.42	0.488	0.416	Polm	11	5827860	5838016	protein_coding	KNOWN
ENSMUSG00000020475	0.33	0.62	0.38	0.19	0.75	0.71	0.5	0.43	0.71	0.57	0.454	0.584	Pgam2	11	5801640	5803733	protein_coding	KNOWN
ENSMUSG00000020476	0.48	0.5	0.47	0.51	0.49	0.49	0.49	0.47	0.5	0.47	0.49	0.484	Dbnl	11	5788488	5800962	protein_coding	KNOWN
ENSMUSG00000020477	0.48	0.46	0.44	0.51	0.52	0.5	0.51	0.48	0.5	0.44	0.482	0.486	Mrps24	11	5703983	5715680	protein_coding	KNOWN
ENSMUSG00000020482	0.5	0.44	0.52	0.49	0.53	0.52	0.54	0.49	0.56	0.46	0.496	0.514	Ccdc117	11	5528887	5542187	protein_coding	KNOWN
ENSMUSG00000020483	0.53	0.52	0.51	0.53	0.53	0.53	0.53	0.51	0.53	0.52	0.524	0.524	Dynll2	11	87979525	87987533	protein_coding	KNOWN
ENSMUSG00000020484	0.51	0.52	0.53	0.5	0.52	0.51	0.51	0.53	0.52	0.52	0.516	0.518	Xbp1	11	5520659	5525893	protein_coding	KNOWN
ENSMUSG00000020485	0.54	0.42	0.6	0.62	0.59	0.56	0.59	0.52	0.52	0.56	0.554	0.55	Supt4h1	11	87737552	87743623	protein_coding	KNOWN
ENSMUSG00000020490	0.19	0.3	0.33	0.23	0.29	0.3	0.21	0.21	0.21	0.31	0.268	0.248	Btnl10	11	58917908	58927158	protein_coding	KNOWN
ENSMUSG00000020492	0.55	0.54	0.55	0.54	0.56	0.52	0.49	0.49	0.51	0.5	0.548	0.502	Fam33a	11	87109234	87124635	protein_coding	KNOWN
ENSMUSG00000020493	0.54	0.64	0.54	0.49	0.45	0.42	0.5	0.47	0.47	0.51	0.532	0.474	Prr11	11	87089153	87108708	protein_coding	KNOWN
ENSMUSG00000020495	0.47	0.54	0.44	0.56	0.61	0.53	0.51	0.56	0.51	0.5	0.524	0.522	1200011M11Rik	11	87077732	87086774	protein_coding	KNOWN
ENSMUSG00000020496	0.52	0.5	0.51	0.49	0.5	0.52	0.48	0.5	0.5	0.52	0.504	0.504	Rnf187	11	58932288	58938916	protein_coding	KNOWN
ENSMUSG00000020516	0.5	0.52	0.48	0.51	0.5	0.49	0.52	0.49	0.51	0.49	0.502	0.5	Rps6kb1	11	86498871	86544805	protein_coding	KNOWN
ENSMUSG00000020519	0.57	0.52	0.55	0.53	0.48	0.51	0.52	0.48	0.52	0.47	0.53	0.5	Sap30l	11	57801637	57810217	protein_coding	KNOWN
ENSMUSG00000020520	0.56	0.54	0.48	0.51	0.51	0.55	0.53	0.52	0.56	0.52	0.52	0.536	Galnt10	11	57645442	57787514	protein_coding	KNOWN
ENSMUSG00000020521	0.54	0.54	0.53	0.54	0.59	0.46	0.54	0.58	0.53	0.53	0.548	0.528	Rnft1	11	86484657	86499025	protein_coding	KNOWN
ENSMUSG00000020522	0.53	0.53	0.54	0.55	0.56	0.54	0.49	0.52	0.5	0.54	0.542	0.518	Mfap3	11	57518664	57533815	protein_coding	KNOWN
ENSMUSG00000020523	0.51	0.51	0.52	0.54	0.5	0.47	0.5	0.52	0.47	0.49	0.516	0.49	Fam114a2	11	57482993	57518617	protein_coding	KNOWN
ENSMUSG00000020525	0.46	0.5	0.54	0.48	0.42	0.46	0.45	0.5	0.5	0.47	0.48	0.476	Ppm1d	11	85311244	85347066	protein_coding	KNOWN
ENSMUSG00000020526	0.48	0.48	0.51	0.41	0.38	0.47	0.48	0.45	0.4	0.53	0.452	0.466	Znhit3	11	84910950	84916366	protein_coding	KNOWN
ENSMUSG00000020527	0.38	0.54	0.47	0.46	0.32	0.45	0.37	0.45	0.47	0.54	0.434	0.456	Myo19	11	84880148	84911226	protein_coding	KNOWN
ENSMUSG00000020528	0.47	0.42	0.43	0.43	0.46	0.44	0.44	0.51	0.46	0.47	0.442	0.464	Prpsap2	11	61729650	61762088	protein_coding	KNOWN
ENSMUSG00000020530	0.46	0.46	0.47	0.5	0.54	0.51	0.48	0.47	0.49	0.53	0.486	0.496	Ggnbp2	11	84832361	84870817	protein_coding	KNOWN
ENSMUSG00000020532	0.49	0.49	0.52	0.47	0.5	0.49	0.49	0.48	0.49	0.51	0.494	0.492	Acaca	11	84129672	84401651	protein_coding	KNOWN
ENSMUSG00000020534	0.42	0.41	0.54	0.21	0.65	0.43	0.36	0.4	0.31	0.34	0.446	0.368	Shmt1	11	60788104	60811718	protein_coding	KNOWN
ENSMUSG00000020536	0.5	0.53	0.47	0.48	0.5	0.5	0.5	0.49	0.47	0.49	0.496	0.49	Llgl1	11	60699723	60714186	protein_coding	KNOWN
ENSMUSG00000020537	0.47	0.47	0.49	0.56	0.49	0.49	0.5	0.52	0.46	0.53	0.496	0.5	Drg2	11	60454591	60468754	protein_coding	KNOWN
ENSMUSG00000020538	0.51	0.48	0.46	0.45	0.51	0.49	0.51	0.5	0.48	0.51	0.482	0.498	Srebf1	11	60199089	60222581	protein_coding	KNOWN
ENSMUSG00000020541	0.47	0.48	0.48	0.46	0.47	0.41	0.42	0.44	0.49	0.47	0.472	0.446	Tom1l1	11	90643465	90688366	protein_coding	KNOWN
ENSMUSG00000020544	0.63	0.55	0.56	0.67	0.63	0.62	0.67	0.59	0.55	0.58	0.608	0.602	Cox11	11	90638173	90644931	protein_coding	KNOWN
ENSMUSG00000020546	0.69	0.66	0.69	0.67	0.65	0.67	0.66	0.65	0.69	0.67	0.672	0.668	Stxbp4	11	90476492	90638084	protein_coding	KNOWN
ENSMUSG00000020547	0.5	0.52	0.43	0.46	0.47	0.52	0.47	0.48	0.49	0.49	0.476	0.49	Bzw2	12	36091846	36156825	protein_coding	KNOWN
ENSMUSG00000020549	0.55	0.52	0.54	0.53	0.46	0.49	0.53	0.55	0.54	0.57	0.52	0.536	Elac2	11	64979038	65002069	protein_coding	KNOWN
ENSMUSG00000020553	0.56	0.34	0.62	0.53	0.7	0.6	0.67	0.59	0.72	0.71	0.55	0.658	Pctp	11	89982665	90002894	protein_coding	KNOWN
ENSMUSG00000020564	0.53	0.52	0.49	0.49	0.46	0.51	0.5	0.51	0.48	0.48	0.498	0.496	Atxn7l1	12	33147693	33375659	protein_coding	KNOWN
ENSMUSG00000020570	0.53	0.54	0.53	0.54	0.5	0.54	0.49	0.53	0.57	0.56	0.528	0.538	Sypl	12	32953891	32979050	protein_coding	KNOWN
ENSMUSG00000020572	0.55	0.5	0.51	0.52	0.55	0.52	0.51	0.54	0.53	0.51	0.526	0.522	Nampt	12	32820335	32853369	protein_coding	KNOWN
ENSMUSG00000020573	0.23	0.27	0.19	0.46	0.11	0.3	0.34	0.25	0.21	0.23	0.252	0.266	Pik3cg	12	32173473	32208659	protein_coding	KNOWN
ENSMUSG00000020576	0.46	0.48	0.46	0.43	0.47	0.47	0.45	0.45	0.47	0.45	0.46	0.458	Nbas	12	13269127	13583810	protein_coding	KNOWN
ENSMUSG00000020577	0.52	0.54	0.5	0.52	0.48	0.52	0.52	0.52	0.51	0.52	0.512	0.518	Tspan13	12	36014557	36042500	protein_coding	KNOWN
ENSMUSG00000020580	0.47	0.49	0.44	0.47	0.47	0.49	0.5	0.52	0.53	0.49	0.468	0.506	Rock2	12	16894978	16988274	protein_coding	KNOWN
ENSMUSG00000020589	0.51	0.49	0.5	0.49	0.48	0.49	0.51	0.5	0.5	0.5	0.494	0.5	Fam49a	12	12262139	12376359	protein_coding	KNOWN
ENSMUSG00000020590	0.53	0.5	0.53	0.52	0.55	0.53	0.55	0.51	0.52	0.5	0.526	0.522	Snx13	12	35047189	35147469	protein_coding	KNOWN
ENSMUSG00000020591	0.46	0.48	0.43	0.45	0.42	0.45	0.44	0.46	0.45	0.44	0.448	0.448	Ntsr2	12	16653470	16660236	protein_coding	KNOWN
ENSMUSG00000020598	0.45	0.46	0.48	0.4	0.43	0.46	0.47	0.47	0.46	0.47	0.444	0.466	Nrcam	12	44328885	44601846	protein_coding	KNOWN
ENSMUSG00000020599	0.52	0.46	0.59	0.42	0.46	0.56	0.49	0.42	0.46	0.61	0.49	0.508	Rgs9	11	109225355	109298129	protein_coding	KNOWN
ENSMUSG00000020601	0.5	0.45	0.5	0.45	0.53	0.52	0.56	0.53	0.49	0.57	0.486	0.534	Trib2	12	15791727	15816877	protein_coding	KNOWN
ENSMUSG00000020605	0.52	0.5	0.58	0.5	0.44	0.46	0.46	0.52	0.42	0.51	0.508	0.474	Hs1bp3	12	8313433	8343824	protein_coding	KNOWN
ENSMUSG00000020607	0.42	0.44	0.44	0.4	0.39	0.4	0.43	0.44	0.43	0.42	0.418	0.424	Fam84a	12	14147599	14152038	protein_coding	KNOWN
ENSMUSG00000020608	0.52	0.5	0.52	0.46	0.41	0.51	0.49	0.48	0.53	0.49	0.482	0.5	Smc6	12	11265886	11319785	protein_coding	KNOWN
ENSMUSG00000020610	0.51	0.46	0.44	0.47	0.5	0.47	0.49	0.48	0.49	0.49	0.476	0.484	Amz2	11	109425946	109452813	protein_coding	KNOWN
ENSMUSG00000020611	0.46	0.48	0.48	0.43	0.52	0.47	0.45	0.48	0.46	0.46	0.474	0.464	Gna13	11	109362831	109401369	protein_coding	KNOWN
ENSMUSG00000020612	0.5	0.5	0.51	0.5	0.49	0.5	0.5	0.5	0.51	0.51	0.5	0.504	Prkar1a	11	109649405	109669656	protein_coding	KNOWN
ENSMUSG00000020620	0.63	0.64	0.65	0.6	0.57	0.59	0.58	0.58	0.64	0.62	0.618	0.602	Abca8b	11	109932190	109995845	protein_coding	KNOWN
ENSMUSG00000020621	0.51	0.53	0.5	0.52	0.56	0.52	0.51	0.53	0.57	0.54	0.524	0.534	Rdh14	12	10390780	10395562	protein_coding	KNOWN
ENSMUSG00000020627	0.52	0.53	0.49	0.5	0.54	0.51	0.49	0.52	0.53	0.49	0.516	0.508	Klhl29	12	5077472	5375682	protein_coding	KNOWN
ENSMUSG00000020628	0.49	0.45	0.48	0.46	0.48	0.44	0.5	0.49	0.5	0.51	0.472	0.488	Ttc15	12	28690629	28750453	protein_coding	KNOWN
ENSMUSG00000020629	0.4	0.35	0.36	0.35	0.34	0.36	0.35	0.36	0.37	0.35	0.36	0.358	Adi1	12	28675231	28682175	protein_coding	KNOWN
ENSMUSG00000020630	0.51	0.37	0.47	0.46	0.55	0.54	0.51	0.53	0.5	0.55	0.472	0.526	Rnaseh1	12	28649602	28659591	protein_coding	KNOWN
ENSMUSG00000020634	0.52	0.53	0.53	0.49	0.52	0.53	0.51	0.52	0.54	0.53	0.518	0.526	Ubxn2a	12	4879032	4907705	protein_coding	KNOWN
ENSMUSG00000020638	0.47	0.51	0.55	0.47	0.46	0.45	0.49	0.47	0.47	0.46	0.492	0.468	Cmpk2	12	26469204	26479835	protein_coding	KNOWN
ENSMUSG00000020639	0.58	0.53	0.6	0.56	0.56	0.55	0.54	0.61	0.56	0.58	0.566	0.568	Pfn4	12	4769295	4778266	protein_coding	KNOWN
ENSMUSG00000020640	0.52	0.53	0.5	0.48	0.54	0.54	0.53	0.55	0.51	0.5	0.514	0.526	Itsn2	12	4593008	4713950	protein_coding	KNOWN
ENSMUSG00000020644	0.46	0.44	0.45	0.46	0.46	0.44	0.46	0.46	0.47	0.46	0.454	0.458	Id2	12	25093801	25096092	protein_coding	KNOWN
ENSMUSG00000020646	0.51	0.5	0.52	0.51	0.5	0.52	0.5	0.5	0.48	0.47	0.508	0.494	Mboat2	12	24831599	24960301	protein_coding	KNOWN
ENSMUSG00000020647	0.48	0.52	0.53	0.54	0.49	0.5	0.52	0.51	0.49	0.53	0.512	0.51	Ncoa1	12	4247363	4477182	protein_coding	KNOWN
ENSMUSG00000020648	0.5	0.44	0.54	0.47	0.61	0.51	0.44	0.53	0.49	0.42	0.512	0.478	Dus4l	12	31640055	31654826	protein_coding	KNOWN
ENSMUSG00000020649	0.59	0.72	0.67	0.71	0.49	0.67	0.53	0.6	0.56	0.63	0.636	0.598	Rrm2	12	24708241	24714146	protein_coding	KNOWN
ENSMUSG00000020650	0.46	0.43	0.51	0.47	0.53	0.5	0.49	0.49	0.49	0.51	0.48	0.496	Bcap29	12	31595354	31634658	protein_coding	KNOWN
ENSMUSG00000020653	0.56	0.51	0.39	0.45	0.54	0.58	0.48	0.54	0.51	0.52	0.49	0.526	Klf11	12	24651371	24662774	protein_coding	KNOWN
ENSMUSG00000020654	0.47	0.47	0.5	0.5	0.52	0.47	0.5	0.48	0.49	0.48	0.492	0.484	Adcy3	12	4133103	4213525	protein_coding	KNOWN
ENSMUSG00000020657	0.53	0.52	0.55	0.53	0.53	0.52	0.52	0.53	0.53	0.52	0.532	0.524	Dnajc27	12	4082574	4110612	protein_coding	KNOWN
ENSMUSG00000020658	0.51	0.5	0.51	0.53	0.47	0.5	0.5	0.48	0.5	0.49	0.504	0.494	Efr3b	12	3962554	4038915	protein_coding	KNOWN
ENSMUSG00000020659	0.45	0.48	0.49	0.5	0.47	0.45	0.51	0.49	0.5	0.47	0.478	0.484	Cbll1	12	31484829	31499616	protein_coding	KNOWN
ENSMUSG00000020664	0.48	0.46	0.48	0.48	0.51	0.49	0.49	0.48	0.47	0.49	0.482	0.484	Dld	12	31331564	31351437	protein_coding	KNOWN
ENSMUSG00000020668	0.52	0.55	0.51	0.51	0.54	0.53	0.54	0.52	0.53	0.52	0.526	0.528	Kif3c	12	3365132	3406494	protein_coding	KNOWN
ENSMUSG00000020671	0.47	0.49	0.46	0.48	0.45	0.49	0.49	0.48	0.47	0.48	0.47	0.482	Rab10	12	3247430	3309969	protein_coding	KNOWN
ENSMUSG00000020672	0.45	0.5	0.45	0.41	0.38	0.49	0.35	0.51	0.45	0.44	0.438	0.448	Sntg2	12	30174482	30373375	protein_coding	KNOWN
ENSMUSG00000020674	0.56	0.56	0.59	0.57	0.51	0.53	0.55	0.57	0.55	0.55	0.558	0.55	Pxdn	12	29938036	30017658	protein_coding	KNOWN
ENSMUSG00000020677	0.54	0.6	0.61	0.57	0.55	0.57	0.61	0.56	0.57	0.57	0.574	0.576	Ddx52	11	83942062	83963088	protein_coding	KNOWN
ENSMUSG00000020681	0.61	0.51	0.49	0.43	0.58	0.5	0.5	0.45	0.51	0.52	0.524	0.496	Ace	11	105967945	105989964	protein_coding	KNOWN
ENSMUSG00000020682	0.58	0.4	0.67	0.41	0.52	0.38	0.31	0.49	0.32	0.47	0.516	0.394	Mmp28	11	83440768	83463071	protein_coding	KNOWN
ENSMUSG00000020684	0.52	0.5	0.51	0.5	0.5	0.51	0.5	0.51	0.51	0.5	0.506	0.506	Rasl10b	11	83409137	83421039	protein_coding	KNOWN
ENSMUSG00000020687	0.5	0.43	0.5	0.49	0.42	0.46	0.51	0.48	0.48	0.48	0.468	0.482	Cdc27	11	104502745	104550620	protein_coding	KNOWN
ENSMUSG00000020689	0.26	0.27	0.35	0.19	0.43	0.3	0.25	0.21	0.22	0.3	0.3	0.256	Itgb3	11	104608000	104670476	protein_coding	KNOWN
ENSMUSG00000020691	0.53	0.51	0.47	0.55	0.43	0.44	0.51	0.5	0.5	0.56	0.498	0.502	Mettl2	11	105126425	105140394	protein_coding	KNOWN
ENSMUSG00000020692	0.28	0.22	0.24	0.29	0.28	0.27	0.31	0.28	0.27	0.26	0.262	0.278	Nle1	11	82900768	82908411	protein_coding	KNOWN
ENSMUSG00000020694	0.46	0.51	0.55	0.44	0.6	0.57	0.57	0.57	0.36	0.49	0.512	0.512	Tlk2	11	105178807	105283959	protein_coding	KNOWN
ENSMUSG00000020695	0.49	0.56	0.5	0.52	0.44	0.57	0.5	0.56	0.54	0.51	0.502	0.536	Mrc2	11	105292643	105351139	protein_coding	KNOWN
ENSMUSG00000020700	0.43	0.49	0.44	0.46	0.48	0.5	0.44	0.48	0.49	0.49	0.46	0.48	Map3k3	11	106084613	106155446	protein_coding	KNOWN
ENSMUSG00000020701	0.57	0.46	0.57	0.6	0.55	0.57	0.55	0.53	0.48	0.53	0.55	0.532	Tmem132e	11	82388900	82446332	protein_coding	KNOWN
ENSMUSG00000020704	0.51	0.5	0.56	0.52	0.5	0.52	0.49	0.54	0.52	0.53	0.518	0.52	Accn1	11	80880169	81968457	protein_coding	KNOWN
ENSMUSG00000020705	0.48	0.49	0.45	0.48	0.54	0.49	0.5	0.49	0.48	0.49	0.488	0.49	Ddx42	11	106216926	106249139	protein_coding	KNOWN
ENSMUSG00000020706	0.55	0.57	0.53	0.55	0.59	0.57	0.56	0.49	0.57	0.6	0.558	0.558	Ftsj3	11	106249142	106256079	protein_coding	KNOWN
ENSMUSG00000020707	0.49	0.3	0.35	0.29	0.44	0.38	0.43	0.39	0.34	0.37	0.374	0.382	Rnf135	11	80183851	80199757	protein_coding	KNOWN
ENSMUSG00000020709	0.5	0.17	0.35	0.25	0.67	0.81	0.53	0.28	0.47	0.56	0.388	0.53	Adap2	11	80154105	80178958	protein_coding	KNOWN
ENSMUSG00000020715	0.5	0.46	0.46	0.51	0.56	0.48	0.53	0.51	0.52	0.51	0.498	0.51	Ern1	11	106394650	106487852	protein_coding	KNOWN
ENSMUSG00000020716	0.49	0.48	0.47	0.48	0.47	0.48	0.48	0.46	0.49	0.46	0.478	0.474	Nf1	11	79339693	79581612	protein_coding	KNOWN
ENSMUSG00000020718	0.59	0.62	0.4	0.44	0.5	0.47	0.43	0.53	0.49	0.48	0.51	0.48	Polg2	11	106768253	106779537	protein_coding	KNOWN
ENSMUSG00000020719	0.5	0.5	0.52	0.5	0.5	0.48	0.5	0.5	0.5	0.49	0.504	0.494	Ddx5	11	106780355	106789185	protein_coding	KNOWN
ENSMUSG00000020720	0.47	0.48	0.48	0.47	0.46	0.48	0.46	0.47	0.45	0.45	0.472	0.462	Psmd12	11	107479484	107504362	protein_coding	KNOWN
ENSMUSG00000020721	0.51	0.46	0.47	0.52	0.51	0.49	0.49	0.49	0.47	0.48	0.494	0.484	Helz	11	107547930	107693826	protein_coding	KNOWN
ENSMUSG00000020723	0.55	0.53	0.56	0.52	0.52	0.55	0.51	0.5	0.51	0.56	0.536	0.526	Cacng4	11	107732357	107794557	protein_coding	KNOWN
ENSMUSG00000020732	0.49	0.52	0.49	0.53	0.52	0.54	0.53	0.51	0.53	0.53	0.51	0.528	Rab37	11	115091431	115162236	protein_coding	KNOWN
ENSMUSG00000020733	0.51	0.51	0.53	0.55	0.53	0.54	0.5	0.5	0.49	0.52	0.526	0.51	Slc9a3r1	11	115163341	115181181	protein_coding	KNOWN
ENSMUSG00000020734	0.48	0.51	0.52	0.45	0.46	0.47	0.53	0.48	0.46	0.5	0.484	0.488	Grin2c	11	115249169	115267243	protein_coding	KNOWN
ENSMUSG00000020741	0.46	0.49	0.49	0.5	0.47	0.51	0.53	0.49	0.49	0.5	0.482	0.504	1300001I01Rik	11	74649495	74670847	protein_coding	KNOWN
ENSMUSG00000020745	0.5	0.49	0.5	0.5	0.47	0.5	0.5	0.49	0.5	0.5	0.492	0.498	Pafah1b1	11	74673949	74724670	protein_coding	KNOWN
ENSMUSG00000020747	0.47	0.53	0.49	0.47	0.46	0.51	0.49	0.49	0.49	0.51	0.484	0.498	2310067B10Rik	11	115765433	115799366	protein_coding	KNOWN
ENSMUSG00000020752	0.44	0.41	0.49	0.42	0.53	0.43	0.48	0.45	0.41	0.43	0.458	0.44	Recql5	11	115892595	115933477	protein_coding	KNOWN
ENSMUSG00000020755	0.49	0.52	0.49	0.5	0.45	0.51	0.52	0.51	0.5	0.52	0.49	0.512	Sap30bp	11	115933282	115966725	protein_coding	KNOWN
ENSMUSG00000020766	0.45	0.39	0.6	0.51	0.41	0.53	0.51	0.55	0.41	0.44	0.472	0.488	Galk1	11	116008457	116012719	protein_coding	KNOWN
ENSMUSG00000020774	0.63	0.68	0.67	0.64	0.61	0.71	0.63	0.6	0.63	0.66	0.646	0.646	Aspa	11	73304992	73326807	protein_coding	KNOWN
ENSMUSG00000020775	0.59	0.62	0.65	0.59	0.52	0.58	0.55	0.61	0.63	0.6	0.594	0.594	Mrpl38	11	116131817	116138868	protein_coding	KNOWN
ENSMUSG00000020776	0.52	0.52	0.56	0.5	0.52	0.53	0.5	0.54	0.53	0.56	0.524	0.532	Fbf1	11	116142285	116168166	protein_coding	KNOWN
ENSMUSG00000020777	0.54	0.54	0.57	0.57	0.53	0.56	0.54	0.54	0.54	0.56	0.55	0.548	Acox1	11	116171888	116199045	protein_coding	KNOWN
ENSMUSG00000020778	0.55	0.6	0.57	0.59	0.52	0.58	0.57	0.56	0.57	0.56	0.566	0.568	2310004N24Rik	11	116198855	116215318	protein_coding	KNOWN
ENSMUSG00000020792	0.54	0.5	0.53	0.49	0.53	0.54	0.51	0.51	0.51	0.52	0.518	0.518	Exoc7	11	116288001	116307233	protein_coding	KNOWN
ENSMUSG00000020793	0.13	0.31	0.36	0.25	0.23	0.25	0.29	0.31	0.21	0.52	0.256	0.316	Galr2	11	116280939	116283938	protein_coding	KNOWN
ENSMUSG00000020802	0.5	0.53	0.53	0.48	0.51	0.52	0.52	0.53	0.49	0.51	0.51	0.514	Ube2o	11	116537740	116581447	protein_coding	KNOWN
ENSMUSG00000020805	0.47	0.58	0.48	0.5	0.4	0.55	0.44	0.48	0.59	0.39	0.486	0.49	Slc13a5	11	72241994	72267222	protein_coding	KNOWN
ENSMUSG00000020807	0.45	0.47	0.5	0.51	0.49	0.51	0.53	0.48	0.51	0.46	0.484	0.498	4933427D14Rik	11	72153929	72207459	protein_coding	KNOWN
ENSMUSG00000020810	0.53	0.53	0.49	0.53	0.53	0.53	0.54	0.54	0.53	0.53	0.522	0.534	Cygb	11	116645595	116654313	protein_coding	KNOWN
ENSMUSG00000020811	0.48	0.47	0.42	0.51	0.49	0.45	0.47	0.48	0.49	0.49	0.474	0.476	Wscd1	11	71749920	71789647	protein_coding	KNOWN
ENSMUSG00000020812	0.47	0.47	0.53	0.49	0.37	0.58	0.49	0.51	0.53	0.49	0.466	0.52	1810032O08Rik	11	116671660	116675799	protein_coding	NOVEL
ENSMUSG00000020814	0.5	0.57	0.48	0.52	0.56	0.5	0.52	0.53	0.55	0.49	0.526	0.518	Mxra7	11	116803062	116828046	protein_coding	KNOWN
ENSMUSG00000020817	0.51	0.48	0.49	0.46	0.48	0.48	0.48	0.49	0.47	0.5	0.484	0.484	Rabep1	11	70844778	70943105	protein_coding	KNOWN
ENSMUSG00000020818	0.55	0.54	0.54	0.56	0.54	0.52	0.54	0.49	0.55	0.57	0.546	0.534	Mfsd11	11	116852440	116875635	protein_coding	KNOWN
ENSMUSG00000020823	0.48	0.48	0.5	0.49	0.49	0.49	0.5	0.48	0.47	0.5	0.488	0.488	Sec14l1	11	117115168	117159268	protein_coding	KNOWN
ENSMUSG00000020826	0.56	0.62	0.5	0.32	0.78	0.5	0.63	0.59	0.69	0.77	0.556	0.636	Nos2	11	78920787	78960254	protein_coding	KNOWN
ENSMUSG00000020827	0.47	0.46	0.48	0.49	0.46	0.46	0.49	0.47	0.48	0.47	0.472	0.474	Mink1	11	70562881	70614483	protein_coding	KNOWN
ENSMUSG00000020828	0.47	0.48	0.46	0.49	0.49	0.46	0.5	0.49	0.47	0.47	0.478	0.478	Pld2	11	70540064	70558110	protein_coding	KNOWN
ENSMUSG00000020829	0.58	0.39	0.44	0.41	0.45	0.46	0.5	0.48	0.5	0.49	0.454	0.486	Slc46a1	11	78465697	78471945	protein_coding	KNOWN
ENSMUSG00000020830	0.48	0.64	0.46	0.53	0.43	0.25	0.32	0.5	0.48	0.43	0.508	0.396	Vmo1	11	70513516	70514616	protein_coding	KNOWN
ENSMUSG00000020832	0.47	0.49	0.4	0.48	0.49	0.43	0.43	0.48	0.44	0.46	0.466	0.448	Eral1	11	78073376	78080383	protein_coding	KNOWN
ENSMUSG00000020840	0.54	0.55	0.58	0.53	0.52	0.47	0.5	0.49	0.47	0.52	0.544	0.49	Blmh	11	76924809	76987379	protein_coding	KNOWN
ENSMUSG00000020841	0.51	0.51	0.5	0.47	0.58	0.51	0.53	0.53	0.53	0.53	0.514	0.526	Cpd	11	76778424	76847018	protein_coding	KNOWN
ENSMUSG00000020843	0.48	0.53	0.52	0.45	0.45	0.5	0.52	0.47	0.49	0.49	0.486	0.494	Timm22	11	76406952	76416292	protein_coding	KNOWN
ENSMUSG00000020844	0.46	0.46	0.56	0.5	0.48	0.5	0.51	0.52	0.54	0.44	0.492	0.502	Nxn	11	76257198	76399140	protein_coding	KNOWN
ENSMUSG00000020846	0.48	0.39	0.46	0.45	0.49	0.44	0.4	0.45	0.43	0.45	0.454	0.434	Fam101b	11	76019194	76027782	protein_coding	KNOWN
ENSMUSG00000020847	0.39	0.43	0.5	0.33	0.44	0.28	0.51	0.11	0.3	0.32	0.418	0.304	Rph3al	11	75830999	75938429	protein_coding	KNOWN
ENSMUSG00000020848	0.5	0.5	0.53	0.45	0.52	0.47	0.5	0.46	0.49	0.52	0.5	0.488	Doc2b	11	75768966	75796049	protein_coding	KNOWN
ENSMUSG00000020849	0.47	0.48	0.48	0.47	0.5	0.48	0.48	0.48	0.48	0.48	0.48	0.48	Ywhae	11	75732869	75765845	protein_coding	KNOWN
ENSMUSG00000020857	0.49	0.49	0.49	0.46	0.53	0.46	0.48	0.49	0.51	0.48	0.492	0.484	Nme2	11	93949814	93956259	protein_coding	KNOWN
ENSMUSG00000020859	0.52	0.52	0.52	0.55	0.52	0.5	0.52	0.51	0.51	0.52	0.526	0.512	Spag9	11	93996091	94126085	protein_coding	KNOWN
ENSMUSG00000020863	0.54	0.55	0.47	0.5	0.43	0.51	0.51	0.51	0.52	0.54	0.498	0.518	Luc7l3	11	94287890	94321988	protein_coding	KNOWN
ENSMUSG00000020864	0.49	0.48	0.51	0.48	0.48	0.49	0.47	0.48	0.48	0.48	0.488	0.48	Ankrd40	11	94328001	94341841	protein_coding	KNOWN
ENSMUSG00000020866	0.44	0.47	0.45	0.49	0.47	0.45	0.5	0.47	0.47	0.45	0.464	0.468	Cacna1g	11	94408391	94474198	protein_coding	KNOWN
ENSMUSG00000020868	0.56	0.51	0.52	0.58	0.56	0.49	0.55	0.53	0.51	0.52	0.546	0.52	Xylt2	11	94663851	94677515	protein_coding	KNOWN
ENSMUSG00000020869	0.5	0.49	0.48	0.48	0.48	0.49	0.49	0.52	0.51	0.5	0.486	0.502	Lrrc59	11	94629767	94645216	protein_coding	KNOWN
ENSMUSG00000020873	0.59	0.6	0.59	0.63	0.59	0.58	0.6	0.54	0.58	0.53	0.6	0.566	Slc35b1	11	95384692	95391776	protein_coding	KNOWN
ENSMUSG00000020876	0.48	0.46	0.5	0.48	0.39	0.48	0.49	0.49	0.51	0.46	0.462	0.486	Snx11	11	96767555	96777559	protein_coding	KNOWN
ENSMUSG00000020877	0.45	0.55	0.52	0.43	0.4	0.55	0.38	0.42	0.35	0.43	0.47	0.426	Scrn2	11	97029938	97033958	protein_coding	KNOWN
ENSMUSG00000020878	0.69	0.6	1	0.65	0.53	0.84	0.5	0.58	0.84	0.76	0.694	0.704	Lrrc46	11	97034602	97041407	protein_coding	KNOWN
ENSMUSG00000020882	0.48	0.43	0.52	0.51	0.45	0.47	0.47	0.52	0.48	0.51	0.478	0.49	Cacnb1	11	98001508	98023034	protein_coding	KNOWN
ENSMUSG00000020883	0.52	0.56	0.51	0.5	0.52	0.52	0.54	0.54	0.53	0.54	0.522	0.534	Fbxl20	11	98082556	98150403	protein_coding	KNOWN
ENSMUSG00000020886	0.51	0.5	0.49	0.5	0.49	0.5	0.49	0.5	0.5	0.49	0.498	0.496	Dlg4	11	70017085	70045532	protein_coding	KNOWN
ENSMUSG00000020887	0.77	0.44	0.75	0.8	0.4	0.65	0.76	0.65	0.71	0.57	0.632	0.668	A230052G05Rik	8	70863127	70865428	protein_coding	KNOWN
ENSMUSG00000020888	0.5	0.49	0.47	0.55	0.58	0.46	0.49	0.52	0.53	0.51	0.518	0.502	Dvl2	11	70000595	70012301	protein_coding	KNOWN
ENSMUSG00000020889	0.5	0.57	0.54	0.51	0.52	0.51	0.5	0.5	0.51	0.53	0.528	0.51	Nr1d1	11	98767932	98775333	protein_coding	KNOWN
ENSMUSG00000020890	0.4	0.51	0.23	0.47	0.5	0.44	0.42	0.37	0.44	0.44	0.422	0.422	Gucy2e	11	69218117	69237036	protein_coding	KNOWN
ENSMUSG00000020891	0.24	0.26	0.34	0.38	0.29	0.23	0.26	0.26	0.33	0.26	0.302	0.268	Alox8	11	69183932	69197843	protein_coding	KNOWN
ENSMUSG00000020892	0.48	0.73	0.13	0.75	0.23	0.71	0.65	0.55	0.51	0.55	0.464	0.594	Aloxe3	11	69125896	69149115	protein_coding	KNOWN
ENSMUSG00000020893	0.49	0.5	0.51	0.49	0.45	0.5	0.5	0.5	0.46	0.49	0.488	0.49	Per1	11	69095217	69109960	protein_coding	KNOWN
ENSMUSG00000020894	0.5	0.5	0.5	0.51	0.5	0.5	0.5	0.49	0.5	0.5	0.502	0.498	Vamp2	11	69088490	69092384	protein_coding	KNOWN
ENSMUSG00000020895	0.46	0.51	0.44	0.5	0.5	0.49	0.51	0.44	0.53	0.45	0.482	0.484	Tmem107	11	69070806	69073293	protein_coding	KNOWN
ENSMUSG00000020899	0.49	0.52	0.51	0.55	0.44	0.53	0.52	0.5	0.53	0.49	0.502	0.514	Pfas	11	68985697	69008460	protein_coding	KNOWN
ENSMUSG00000020900	0.48	0.48	0.5	0.5	0.52	0.49	0.5	0.5	0.51	0.5	0.496	0.5	Myh10	11	68691559	68816632	protein_coding	KNOWN
ENSMUSG00000020901	0.65	0.25	0.63	0.41	0.73	0.52	0.58	0.68	0.57	0.48	0.534	0.566	Pik3r5	11	68432121	68497849	protein_coding	KNOWN
ENSMUSG00000020903	0.67	0.67	0.56	0.59	0.4	0.63	0.7	0.69	0.63	0.58	0.578	0.646	Stx8	11	67966193	68207148	protein_coding	KNOWN
ENSMUSG00000020910	0.43	0.44	0.34	0.46	0.49	0.4	0.38	0.4	0.42	0.35	0.432	0.39	2310004I24Rik	11	67037905	67052594	protein_coding	KNOWN
ENSMUSG00000020912	0.78	0.68	0.76	0.78	0.88	0.71	0.77	0.75	0.8	0.79	0.776	0.764	Krt12	11	99415666	99422259	protein_coding	KNOWN
ENSMUSG00000020914	0.6	0.24	0.5	0.52	0.37	0.4	0.49	0.72	0.39	0.55	0.446	0.51	Top2a	11	98992943	99024189	protein_coding	KNOWN
ENSMUSG00000020917	0.57	0.55	0.52	0.6	0.57	0.56	0.55	0.55	0.56	0.56	0.562	0.556	Acly	11	100476353	100528000	protein_coding	KNOWN
ENSMUSG00000020919	0.49	0.45	0.46	0.5	0.43	0.48	0.49	0.47	0.48	0.47	0.466	0.478	Stat5b	11	100780731	100850724	protein_coding	KNOWN
ENSMUSG00000020921	0.46	0.48	0.52	0.47	0.53	0.43	0.45	0.51	0.45	0.5	0.492	0.468	Tmem101	11	102152546	102156404	protein_coding	KNOWN
ENSMUSG00000020923	0.59	0.59	0.57	0.63	0.61	0.6	0.59	0.6	0.59	0.58	0.598	0.592	Ubtf	11	102304560	102319742	protein_coding	KNOWN
ENSMUSG00000020925	0.49	0.43	0.44	0.53	0.49	0.53	0.48	0.51	0.5	0.49	0.476	0.502	Ccdc43	11	102684686	102697782	protein_coding	KNOWN
ENSMUSG00000020928	0.77	0.5	0.6	0.7	0.67	0.58	0.38	0.72	0.79	0.53	0.648	0.6	Higd1b	11	102835849	102838040	protein_coding	KNOWN
ENSMUSG00000020929	0.5	0.49	0.49	0.51	0.5	0.48	0.51	0.52	0.5	0.51	0.498	0.504	Eftud2	11	102838473	102880985	protein_coding	KNOWN
ENSMUSG00000020932	0.52	0.51	0.51	0.51	0.5	0.51	0.5	0.5	0.51	0.49	0.51	0.502	Gfap	11	102887336	102900912	protein_coding	KNOWN
ENSMUSG00000020935	0.52	0.52	0.55	0.55	0.57	0.54	0.55	0.54	0.53	0.51	0.542	0.534	Dcakd	11	102994047	103028333	protein_coding	KNOWN
ENSMUSG00000020936	0.58	0.55	0.55	0.58	0.55	0.56	0.55	0.54	0.57	0.55	0.562	0.554	Nmt1	11	103028190	103068912	protein_coding	KNOWN
ENSMUSG00000020937	0.39	0.33	0.41	0.33	0.39	0.42	0.36	0.36	0.38	0.38	0.37	0.38	Plcd3	11	103070304	103101658	protein_coding	KNOWN
ENSMUSG00000020941	0.53	0.56	0.51	0.53	0.57	0.53	0.58	0.53	0.49	0.53	0.54	0.532	Map3k14	11	103219762	103267472	protein_coding	KNOWN
ENSMUSG00000020946	0.57	0.57	0.56	0.58	0.54	0.55	0.56	0.56	0.57	0.58	0.564	0.564	Gosr2	11	103676849	103697898	protein_coding	KNOWN
ENSMUSG00000020948	0.49	0.54	0.49	0.53	0.47	0.5	0.54	0.49	0.5	0.48	0.504	0.502	Klhl28	12	64942440	64965536	protein_coding	KNOWN
ENSMUSG00000020949	0.55	0.56	0.55	0.54	0.52	0.6	0.55	0.55	0.56	0.57	0.544	0.566	Fkbp3	12	65062436	65073944	protein_coding	KNOWN
ENSMUSG00000020950	0.49	0.42	0.5	0.48	0.45	0.48	0.44	0.48	0.52	0.5	0.468	0.484	Foxg1	12	49382693	49386867	protein_coding	KNOWN
ENSMUSG00000020952	0.48	0.52	0.48	0.46	0.46	0.46	0.5	0.47	0.44	0.47	0.48	0.468	Scfd1	12	51377580	51450096	protein_coding	KNOWN
ENSMUSG00000020953	0.32	0.33	0.41	0.31	0.42	0.3	0.39	0.31	0.34	0.35	0.358	0.338	Coch	12	51593341	51605773	protein_coding	KNOWN
ENSMUSG00000020955	0.59	0.58	0.57	0.61	0.54	0.57	0.57	0.6	0.59	0.61	0.578	0.588	Ap4s1	12	51690966	51738939	protein_coding	KNOWN
ENSMUSG00000020956	0.48	0.47	0.55	0.56	0.61	0.48	0.57	0.46	0.5	0.48	0.534	0.498	6530401N04Rik	12	51988312	52006501	protein_coding	KNOWN
ENSMUSG00000020961	0.48	0.45	0.44	0.45	0.52	0.48	0.44	0.46	0.49	0.49	0.468	0.472	Ston2	12	91638542	91788387	protein_coding	KNOWN
ENSMUSG00000020962	0.53	0.52	0.5	0.47	0.48	0.53	0.52	0.54	0.53	0.54	0.5	0.532	Gtf2a1	12	91555916	91590487	protein_coding	KNOWN
ENSMUSG00000020963	0.5	0.25	0.39	0.33	0.5	0.61	0.51	0.52	0.53	0.41	0.394	0.516	Tshr	12	91400993	91540509	protein_coding	KNOWN
ENSMUSG00000020964	0.54	0.53	0.54	0.52	0.53	0.52	0.52	0.54	0.54	0.54	0.532	0.532	Sel1l	12	91806043	91849157	protein_coding	KNOWN
ENSMUSG00000020973	0.72	0.73	0.72	0.66	0.71	0.75	0.68	0.73	0.73	0.65	0.708	0.708	1110034A24Rik	12	69189087	69198429	protein_coding	KNOWN
ENSMUSG00000020978	0.53	0.52	0.54	0.54	0.57	0.54	0.53	0.53	0.55	0.53	0.54	0.536	Klhdc2	12	69296681	69310687	protein_coding	KNOWN
ENSMUSG00000020982	0.47	0.55	0.57	0.52	0.55	0.5	0.53	0.54	0.49	0.51	0.532	0.514	Nemf	12	69311544	69357176	protein_coding	KNOWN
ENSMUSG00000020986	0.45	0.45	0.44	0.44	0.45	0.46	0.45	0.46	0.45	0.45	0.446	0.454	Sec23a	12	58958383	59012017	protein_coding	KNOWN
ENSMUSG00000020988	0.46	0.51	0.51	0.54	0.47	0.5	0.5	0.5	0.46	0.53	0.498	0.498	L2hgdh	12	69690436	69724874	protein_coding	KNOWN
ENSMUSG00000020990	0.34	0.38	0.4	0.45	0.43	0.35	0.35	0.31	0.38	0.36	0.4	0.35	Cdkl1	12	69746848	69790707	protein_coding	KNOWN
ENSMUSG00000020993	0.52	0.5	0.52	0.48	0.48	0.5	0.53	0.48	0.52	0.5	0.5	0.506	Trappc6b	12	59043093	59061461	protein_coding	KNOWN
ENSMUSG00000020994	0.54	0.5	0.55	0.51	0.49	0.52	0.51	0.52	0.52	0.48	0.518	0.51	Pnn	12	59066919	59074017	protein_coding	KNOWN
ENSMUSG00000021000	0.52	0.55	0.57	0.53	0.54	0.5	0.54	0.51	0.53	0.51	0.542	0.518	Ctage5	12	59129720	59191583	protein_coding	KNOWN
ENSMUSG00000021003	0.55	0.58	0.59	0.59	0.56	0.53	0.55	0.55	0.57	0.56	0.574	0.552	Galc	12	98202304	98259459	protein_coding	KNOWN
ENSMUSG00000021010	0.42	0.47	0.46	0.39	0.37	0.44	0.45	0.46	0.52	0.41	0.422	0.456	Npas3	12	53248677	54072175	protein_coding	KNOWN
ENSMUSG00000021012	0.47	0.5	0.46	0.49	0.49	0.48	0.48	0.49	0.46	0.49	0.482	0.48	Zc3h14	12	98746968	98787774	protein_coding	KNOWN
ENSMUSG00000021013	0.34	0.41	0.47	0.44	0.43	0.41	0.43	0.43	0.41	0.44	0.418	0.424	Ttc8	12	98920574	98983238	protein_coding	KNOWN
ENSMUSG00000021018	0.61	0.58	0.63	0.59	0.63	0.55	0.57	0.58	0.6	0.63	0.608	0.586	Polr2h	16	20717665	20722267	protein_coding	KNOWN
ENSMUSG00000021022	0.49	0.53	0.52	0.52	0.45	0.55	0.46	0.54	0.49	0.51	0.502	0.51	Ppp2r3c	12	55280814	55303000	protein_coding	KNOWN
ENSMUSG00000021023	0.39	0.32	0.48	0.4	0.46	0.4	0.41	0.32	0.31	0.33	0.41	0.354	1110008L16Rik	12	55302637	55382491	protein_coding	KNOWN
ENSMUSG00000021025	0.52	0.53	0.56	0.49	0.5	0.5	0.43	0.49	0.47	0.5	0.52	0.478	Nfkbia	12	55489411	55492647	protein_coding	KNOWN
ENSMUSG00000021028	0.53	0.44	0.47	0.56	0.5	0.44	0.54	0.62	0.59	0.57	0.5	0.552	Mbip	12	56328306	56345894	protein_coding	KNOWN
ENSMUSG00000021033	0.31	0.33	0.34	0.27	0.32	0.32	0.34	0.33	0.36	0.33	0.314	0.336	Gstz1	12	87147707	87164721	protein_coding	KNOWN
ENSMUSG00000021036	0.5	0.4	0.39	0.46	0.44	0.44	0.48	0.47	0.47	0.45	0.438	0.462	Sptlc2	12	87305058	87388355	protein_coding	KNOWN
ENSMUSG00000021039	0.49	0.49	0.43	0.47	0.51	0.49	0.48	0.49	0.5	0.5	0.478	0.492	Snw1	12	87449936	87472299	protein_coding	KNOWN
ENSMUSG00000021040	0.52	0.58	0.53	0.56	0.62	0.57	0.54	0.59	0.55	0.58	0.562	0.566	1810035L17Rik	12	87443896	87452206	protein_coding	KNOWN
ENSMUSG00000021044	0.54	0.61	0.55	0.51	0.56	0.49	0.54	0.51	0.54	0.52	0.554	0.52	Adck1	12	88360554	88461719	protein_coding	KNOWN
ENSMUSG00000021047	0.49	0.42	0.41	0.43	0.49	0.56	0.45	0.56	0.45	0.47	0.448	0.498	Nova1	12	46694517	46818775	protein_coding	KNOWN
ENSMUSG00000021048	0.49	0.44	0.42	0.44	0.46	0.46	0.43	0.45	0.45	0.48	0.45	0.454	Mthfd1	12	76255232	76319820	protein_coding	KNOWN
ENSMUSG00000021051	0.45	0.51	0.53	0.48	0.49	0.52	0.51	0.52	0.52	0.53	0.492	0.52	Ppp2r5e	12	75450883	75596200	protein_coding	KNOWN
ENSMUSG00000021054	0.43	0.45	0.56	0.45	0.54	0.44	0.43	0.57	0.48	0.47	0.486	0.478	Sgpp1	12	75714248	75735729	protein_coding	KNOWN
ENSMUSG00000021061	0.45	0.45	0.46	0.42	0.45	0.45	0.45	0.45	0.45	0.47	0.446	0.454	Spnb1	12	76580488	76710547	protein_coding	KNOWN
ENSMUSG00000021062	0.49	0.48	0.48	0.51	0.44	0.49	0.47	0.48	0.47	0.48	0.48	0.478	Rab15	12	76797960	76822908	protein_coding	KNOWN
ENSMUSG00000021066	0.48	0.51	0.44	0.49	0.46	0.51	0.48	0.5	0.48	0.48	0.476	0.49	Atl1	12	69893105	69964085	protein_coding	KNOWN
ENSMUSG00000021067	0.49	0.48	0.46	0.49	0.53	0.56	0.5	0.49	0.55	0.54	0.49	0.528	Sav1	12	69965012	69987002	protein_coding	KNOWN
ENSMUSG00000021068	0.52	0.53	0.49	0.51	0.49	0.54	0.52	0.54	0.53	0.52	0.508	0.53	Nin	12	70011435	70111925	protein_coding	KNOWN
ENSMUSG00000021071	0.51	0.5	0.51	0.51	0.5	0.52	0.49	0.5	0.52	0.51	0.506	0.508	Trim9	12	70244539	70347614	protein_coding	KNOWN
ENSMUSG00000021072	0.55	0.51	0.55	0.52	0.55	0.51	0.51	0.51	0.52	0.49	0.536	0.508	Tmx1	12	70453095	70468040	protein_coding	KNOWN
ENSMUSG00000021076	0.45	0.45	0.44	0.44	0.4	0.43	0.45	0.44	0.42	0.43	0.436	0.434	Actr10	12	70937857	70964718	protein_coding	KNOWN
ENSMUSG00000021079	0.47	0.55	0.46	0.52	0.46	0.52	0.47	0.52	0.48	0.54	0.492	0.506	Timm9	12	71123173	71136675	protein_coding	KNOWN
ENSMUSG00000021087	0.47	0.48	0.48	0.48	0.45	0.47	0.48	0.48	0.48	0.47	0.472	0.476	Rtn1	12	72211752	72409054	protein_coding	KNOWN
ENSMUSG00000021090	0.41	0.47	0.41	0.47	0.3	0.45	0.44	0.42	0.51	0.43	0.412	0.45	Lrrc9	12	72441866	72514334	protein_coding	KNOWN
ENSMUSG00000021091	0.37	0.34	0.35	0.37	0.33	0.34	0.35	0.38	0.38	0.35	0.352	0.36	Serpina3n	12	104406729	104414329	protein_coding	KNOWN
ENSMUSG00000021094	0.38	0.36	0.47	0.43	0.45	0.38	0.39	0.39	0.38	0.37	0.418	0.382	Dhrs7	12	72650356	72664828	protein_coding	KNOWN
ENSMUSG00000021096	0.51	0.49	0.5	0.54	0.48	0.5	0.51	0.51	0.52	0.48	0.504	0.504	Ppm1a	12	72761211	72794940	protein_coding	KNOWN
ENSMUSG00000021097	0.57	0.56	0.52	0.53	0.51	0.51	0.49	0.5	0.53	0.55	0.538	0.516	Clmn	12	104763114	104865076	protein_coding	KNOWN
ENSMUSG00000021098	0.67	0.69	0.86	0.75	0.4	0.76	0.74	0.89	0.94	0.77	0.674	0.82	4930447C04Rik	12	72881109	72940833	protein_coding	KNOWN
ENSMUSG00000021102	0.45	0.44	0.48	0.51	0.51	0.52	0.53	0.48	0.47	0.51	0.478	0.502	Glrx5	12	105032689	105040910	protein_coding	KNOWN
ENSMUSG00000021103	0.48	0.46	0.46	0.54	0.48	0.57	0.51	0.54	0.45	0.43	0.484	0.5	Mnat1	12	73123717	73273988	protein_coding	KNOWN
ENSMUSG00000021108	0.45	0.23	0.32	0.44	0.49	0.34	0.44	0.42	0.35	0.43	0.386	0.396	Prkch	12	73584797	73778185	protein_coding	KNOWN
ENSMUSG00000021111	0.54	0.54	0.5	0.51	0.53	0.51	0.55	0.52	0.53	0.5	0.524	0.522	Papola	12	105784694	105838944	protein_coding	KNOWN
ENSMUSG00000021112	0.56	0.55	0.56	0.57	0.59	0.59	0.57	0.54	0.55	0.52	0.566	0.554	Mpp5	12	78748947	78840711	protein_coding	KNOWN
ENSMUSG00000021113	0.57	0.52	0.59	0.67	0.72	0.54	0.61	0.6	0.59	0.61	0.614	0.59	Snapc1	12	73964530	73984820	protein_coding	KNOWN
ENSMUSG00000021114	0.46	0.48	0.43	0.46	0.48	0.48	0.46	0.49	0.46	0.5	0.462	0.478	Atp6v1d	12	78842989	78861638	protein_coding	KNOWN
ENSMUSG00000021115	0.62	0.71	0.63	0.58	0.64	0.65	0.62	0.66	0.62	0.66	0.636	0.642	Vrk1	12	106010263	106077410	protein_coding	KNOWN
ENSMUSG00000021116	0.47	0.42	0.53	0.54	0.45	0.48	0.52	0.51	0.44	0.49	0.482	0.488	Eif2s1	12	78861819	78887010	protein_coding	KNOWN
ENSMUSG00000021120	0.5	0.47	0.42	0.44	0.4	0.41	0.46	0.39	0.5	0.41	0.446	0.434	Pigh	12	79080673	79089670	protein_coding	KNOWN
ENSMUSG00000021124	0.46	0.45	0.46	0.48	0.46	0.48	0.45	0.46	0.47	0.48	0.462	0.468	Vti1b	12	79156017	79172667	protein_coding	KNOWN
ENSMUSG00000021125	0.5	0.43	0.47	0.46	0.44	0.3	0.41	0.38	0.28	0.39	0.46	0.352	Arg2	12	79130777	79156301	protein_coding	KNOWN
ENSMUSG00000021127	0.5	0.47	0.48	0.51	0.44	0.48	0.49	0.48	0.47	0.51	0.48	0.486	Zfp36l1	12	80107760	80113013	protein_coding	KNOWN
ENSMUSG00000021130	0.49	0.49	0.5	0.52	0.49	0.49	0.49	0.49	0.47	0.5	0.498	0.488	Galntl1	12	80518990	80603896	protein_coding	KNOWN
ENSMUSG00000021133	0.58	0.57	0.54	0.59	0.54	0.48	0.57	0.56	0.54	0.55	0.564	0.54	4933426M11Rik	12	80790532	80880832	protein_coding	KNOWN
ENSMUSG00000021134	0.57	0.54	0.56	0.55	0.54	0.56	0.51	0.57	0.56	0.57	0.552	0.554	Srsf5	12	80945504	80950507	protein_coding	KNOWN
ENSMUSG00000021140	0.49	0.49	0.5	0.48	0.48	0.48	0.49	0.49	0.49	0.49	0.488	0.488	Pcnx	12	81860030	82000924	protein_coding	KNOWN
ENSMUSG00000021143	0.47	0.49	0.51	0.48	0.51	0.48	0.49	0.5	0.49	0.49	0.492	0.49	Pacs2	12	113014508	113074401	protein_coding	KNOWN
ENSMUSG00000021147	0.52	0.5	0.49	0.49	0.48	0.48	0.52	0.48	0.48	0.5	0.496	0.492	Wdr37	13	8802968	8871909	protein_coding	KNOWN
ENSMUSG00000021149	0.45	0.48	0.43	0.53	0.44	0.51	0.51	0.52	0.5	0.55	0.466	0.518	Gtpbp4	13	8972071	8996017	protein_coding	KNOWN
ENSMUSG00000021156	0.52	0.52	0.49	0.51	0.5	0.51	0.51	0.51	0.5	0.5	0.508	0.506	Zmynd11	13	9684836	9765321	protein_coding	KNOWN
ENSMUSG00000021171	0.43	0.4	0.42	0.41	0.47	0.45	0.45	0.43	0.43	0.45	0.426	0.442	Esyt2	12	116281222	116373096	protein_coding	KNOWN
ENSMUSG00000021175	0.49	0.57	0.46	0.46	0.65	0.47	0.48	0.56	0.57	0.49	0.526	0.514	Cdca7l	12	117804289	117878706	protein_coding	KNOWN
ENSMUSG00000021177	0.53	0.46	0.54	0.57	0.52	0.5	0.49	0.49	0.54	0.52	0.524	0.508	Tdp1	12	99884517	99955219	protein_coding	KNOWN
ENSMUSG00000021178	0.51	0.47	0.48	0.51	0.5	0.5	0.49	0.5	0.5	0.49	0.494	0.496	Psmc1	12	100110186	100123364	protein_coding	KNOWN
ENSMUSG00000021179	0.53	0.56	0.45	0.5	0.48	0.56	0.5	0.48	0.56	0.53	0.504	0.526	BC002230	12	100125452	100159653	protein_coding	KNOWN
ENSMUSG00000021180	0.53	0.62	0.56	0.5	0.44	0.55	0.55	0.53	0.54	0.56	0.53	0.546	Rps6ka5	12	100549778	100725028	protein_coding	KNOWN
ENSMUSG00000021186	0.64	0.51	0.44	0.51	0.49	0.5	0.51	0.57	0.53	0.51	0.518	0.524	Fbln5	12	101746565	101819055	protein_coding	KNOWN
ENSMUSG00000021187	0.55	0.57	0	0.32	0.29	0	0	0.31	0.36	0.33	0.346	0.2	Tc2n	12	101645443	101718523	protein_coding	KNOWN
ENSMUSG00000021188	0.52	0.55	0.53	0.54	0.51	0.52	0.53	0.53	0.51	0.51	0.53	0.52	Trip11	12	101834043	101913267	protein_coding	KNOWN
ENSMUSG00000021189	0.63	0.57	0.6	0.64	0.58	0.59	0.6	0.58	0.61	0.59	0.604	0.594	Atxn3	12	101918901	101958246	protein_coding	KNOWN
ENSMUSG00000021190	0.51	0.52	0.49	0.52	0.45	0.51	0.53	0.48	0.51	0.49	0.498	0.504	Lgmn	12	102394084	102439813	protein_coding	KNOWN
ENSMUSG00000021193	0.46	0.43	0.45	0.43	0.45	0.46	0.45	0.43	0.43	0.43	0.444	0.44	Pitrm1	13	6548157	6580139	protein_coding	KNOWN
ENSMUSG00000021194	0.53	0.5	0.55	0.5	0.55	0.52	0.53	0.53	0.52	0.51	0.526	0.522	Chga	12	102554969	102565027	protein_coding	KNOWN
ENSMUSG00000021196	0.51	0.5	0.52	0.51	0.48	0.51	0.52	0.53	0.53	0.52	0.504	0.522	Pfkp	13	6579768	6648777	protein_coding	KNOWN
ENSMUSG00000021200	0.65	0.59	0.67	0.57	0.64	0.69	0.59	0.66	0.67	0.61	0.624	0.644	Asb2	12	103321142	103356001	protein_coding	KNOWN
ENSMUSG00000021203	0.53	0.56	0.53	0.49	0.47	0.53	0.49	0.53	0.56	0.5	0.516	0.522	Otub2	12	103388682	103406350	protein_coding	KNOWN
ENSMUSG00000021209	0.52	0.5	0.51	0.53	0.5	0.53	0.51	0.5	0.51	0.51	0.512	0.512	Ppp4r4	12	103532565	103613832	protein_coding	KNOWN
ENSMUSG00000021215	0.53	0.53	0.46	0.54	0.49	0.54	0.5	0.5	0.53	0.54	0.51	0.522	Net1	13	3882565	3918220	protein_coding	KNOWN
ENSMUSG00000021217	0.45	0.36	0.48	0.63	0.54	0.41	0.42	0.47	0.4	0.43	0.492	0.426	Tshz3	7	36698118	36773545	protein_coding	KNOWN
ENSMUSG00000021218	0.5	0.5	0.51	0.52	0.51	0.49	0.5	0.49	0.52	0.52	0.508	0.504	Gdi2	13	3538075	3566261	protein_coding	KNOWN
ENSMUSG00000021219	0.5	0.61	0.52	0.61	0.52	0.53	0.51	0.54	0.53	0.54	0.552	0.53	Rgs6	12	82616925	83133744	protein_coding	KNOWN
ENSMUSG00000021221	0.57	0.48	0.45	0.5	0.56	0.54	0.54	0.48	0.52	0.53	0.512	0.522	Dpf3	12	83213745	83487716	protein_coding	KNOWN
ENSMUSG00000021222	0.55	0.46	0.52	0.55	0.65	0.56	0.57	0.58	0.59	0.55	0.546	0.57	Dcaf4	12	83520466	83541988	protein_coding	KNOWN
ENSMUSG00000021226	0.59	0.5	0.48	0.47	0.56	0.52	0.56	0.55	0.55	0.56	0.52	0.548	Acot2	12	83987861	83993873	protein_coding	KNOWN
ENSMUSG00000021234	0.52	0.52	0.53	0.59	0.56	0.57	0.52	0.57	0.52	0.58	0.544	0.552	Fam161b	12	84345309	84361833	protein_coding	KNOWN
ENSMUSG00000021236	0.52	0.51	0.5	0.51	0.53	0.52	0.48	0.5	0.48	0.5	0.514	0.496	Entpd5	12	84373857	84409029	protein_coding	KNOWN
ENSMUSG00000021238	0.48	0.47	0.44	0.47	0.51	0.46	0.47	0.48	0.49	0.45	0.474	0.47	Aldh6a1	12	84430723	84450950	protein_coding	KNOWN
ENSMUSG00000021240	0.55	0.59	0.49	0.53	0.52	0.54	0.56	0.51	0.58	0.52	0.536	0.542	Abcd4	12	84602531	84617466	protein_coding	KNOWN
ENSMUSG00000021241	0.48	0.45	0.53	0.43	0.5	0.45	0.48	0.5	0.44	0.51	0.478	0.476	Isca2	12	84773270	84775089	protein_coding	KNOWN
ENSMUSG00000021242	0.55	0.55	0.57	0.59	0.54	0.55	0.54	0.53	0.5	0.55	0.56	0.534	Npc2	12	84754560	84773112	protein_coding	KNOWN
ENSMUSG00000021243	0.49	0.5	0.47	0.53	0.4	0.53	0.53	0.52	0.54	0.39	0.478	0.502	Fcf1	12	84970897	84983303	protein_coding	KNOWN
ENSMUSG00000021244	0.5	0.47	0.48	0.5	0.54	0.51	0.5	0.47	0.52	0.48	0.498	0.496	Ylpm1	12	84996321	85070515	protein_coding	KNOWN
ENSMUSG00000021248	0.48	0.5	0.48	0.48	0.47	0.48	0.48	0.46	0.49	0.48	0.482	0.478	Tmed10	12	85340614	85374717	protein_coding	KNOWN
ENSMUSG00000021250	0.48	0.52	0.47	0.5	0.51	0.54	0.56	0.49	0.49	0.51	0.496	0.518	Fos	12	85473890	85477273	protein_coding	KNOWN
ENSMUSG00000021252	0.5	0.46	0.49	0.5	0.54	0.55	0.52	0.52	0.52	0.49	0.498	0.52	0610007P14Rik	12	85815448	85824550	protein_coding	KNOWN
ENSMUSG00000021253	0.56	0.59	0.51	0.51	0.55	0.57	0.51	0.59	0.53	0.54	0.544	0.548	Tgfb3	12	86056744	86079041	protein_coding	KNOWN
ENSMUSG00000021254	0.51	0.5	0.5	0.59	0.5	0.5	0.52	0.53	0.5	0.46	0.52	0.502	1700020O03Rik	12	86241890	86291414	protein_coding	KNOWN
ENSMUSG00000021256	0.51	0.54	0.53	0.48	0.44	0.5	0.48	0.53	0.48	0.51	0.5	0.5	Vash1	12	86678700	86692091	protein_coding	KNOWN
ENSMUSG00000021257	0.58	0.5	0.55	0.54	0.43	0.53	0.49	0.49	0.56	0.5	0.52	0.514	Angel1	12	86700502	86726460	protein_coding	KNOWN
ENSMUSG00000021258	0.51	0.58	0.57	0.57	0.55	0.47	0.52	0.56	0.43	0.52	0.556	0.5	Ccnk	12	108179738	108203359	protein_coding	KNOWN
ENSMUSG00000021259	0.59	0.59	0.58	0.58	0.59	0.58	0.6	0.6	0.58	0.6	0.586	0.592	Cyp46a1	12	108334377	108362231	protein_coding	KNOWN
ENSMUSG00000021260	0.44	0.5	0.56	0.41	0.57	0.48	0.52	0.42	0.5	0.49	0.496	0.482	Hhipl1	12	108306270	108328300	protein_coding	KNOWN
ENSMUSG00000021263	0.62	0.41	0.44	0.48	0.4	0.31	0.47	0.43	0.44	0.53	0.47	0.436	Degs2	12	108686792	108702306	protein_coding	KNOWN
ENSMUSG00000021264	0.52	0.54	0.46	0.54	0.55	0.52	0.47	0.51	0.47	0.51	0.522	0.496	Yy1	12	108792973	108816632	protein_coding	KNOWN
ENSMUSG00000021265	0.55	0.47	0.52	0.57	0.47	0.47	0.5	0.49	0.49	0.51	0.516	0.492	Slc25a29	12	108825873	108835883	protein_coding	KNOWN
ENSMUSG00000021268	0.03	0.01	0	0	0.01	1	1	1	1	1	0.01	1	Meg3	12	109541001	109571726	lincRNA	NOVEL
ENSMUSG00000021270	0.52	0.51	0.52	0.52	0.52	0.5	0.5	0.51	0.5	0.51	0.518	0.504	Hsp90aa1	12	110690605	110702728	protein_coding	KNOWN
ENSMUSG00000021271	0.58	0.53	0.52	0.59	0.5	0.57	0.54	0.51	0.56	0.62	0.544	0.56	Zfp839	12	110850279	110869998	protein_coding	KNOWN
ENSMUSG00000021273	0.48	0.48	0.48	0.51	0.41	0.49	0.46	0.47	0.44	0.45	0.472	0.462	Fdft1	14	63145153	63177793	protein_coding	KNOWN
ENSMUSG00000021276	0.6	0.47	0.49	0.55	0.47	0.47	0.55	0.51	0.53	0.54	0.516	0.52	Cinp	12	110872610	110889145	protein_coding	KNOWN
ENSMUSG00000021278	0.58	0.63	0.39	0.58	0.64	0.46	0.56	0.58	0.48	0.47	0.564	0.51	Amn	12	111271111	111276426	protein_coding	KNOWN
ENSMUSG00000021279	0.51	0.5	0.49	0.51	0.46	0.51	0.5	0.49	0.51	0.5	0.494	0.502	Cdc42bpb	12	111292972	111377718	protein_coding	KNOWN
ENSMUSG00000021280	0.83	0.43	0.6	0.57	0.61	0.43	0.52	0.57	0.47	0.69	0.608	0.536	1200009I06Rik	12	111417430	111431182	protein_coding	KNOWN
ENSMUSG00000021282	0.52	0.48	0.54	0.51	0.5	0.52	0.51	0.5	0.51	0.5	0.51	0.508	Eif5	12	111538101	111546753	protein_coding	KNOWN
ENSMUSG00000021285	0.5	0.42	0.49	0.51	0.52	0.47	0.47	0.47	0.45	0.49	0.488	0.47	Ppp1r13b	12	111828458	111908055	protein_coding	KNOWN
ENSMUSG00000021286	0.41	0.39	0.43	0.51	0.51	0.49	0.47	0.48	0.48	0.49	0.45	0.482	Zfyve21	12	111814170	111828388	protein_coding	KNOWN
ENSMUSG00000021287	0.51	0.56	0.56	0.6	0.58	0.58	0.56	0.48	0.54	0.53	0.562	0.538	Xrcc3	12	111803192	111813873	protein_coding	KNOWN
ENSMUSG00000021288	0.5	0.5	0.5	0.51	0.51	0.5	0.5	0.5	0.51	0.51	0.504	0.504	Klc1	12	111758849	111807844	protein_coding	KNOWN
ENSMUSG00000021290	0.43	0.46	0.45	0.56	0.44	0.51	0.51	0.46	0.46	0.53	0.468	0.494	2010107E04Rik	12	111961376	111966977	protein_coding	KNOWN
ENSMUSG00000021294	0.55	0.52	0.5	0.57	0.53	0.51	0.48	0.52	0.53	0.53	0.534	0.514	Kif26a	12	112146235	112181746	protein_coding	KNOWN
ENSMUSG00000021301	0.5	0.5	0.55	0.54	0.54	0.53	0.49	0.51	0.5	0.5	0.526	0.506	Hecw1	13	14226438	14523226	protein_coding	KNOWN
ENSMUSG00000021302	0.5	0.53	0.57	0.5	0.61	0.5	0.55	0.54	0.5	0.51	0.542	0.52	Ggps1	13	14052449	14063401	protein_coding	KNOWN
ENSMUSG00000021303	0.46	0.47	0.47	0.48	0.46	0.47	0.47	0.46	0.47	0.47	0.468	0.468	Gng4	13	13784059	13827897	protein_coding	KNOWN
ENSMUSG00000021306	0.41	0.39	0.49	0.41	0.4	0.37	0.32	0.47	0.45	0.42	0.42	0.406	Gpr137b	13	13357623	13393624	protein_coding	KNOWN
ENSMUSG00000021311	0.4	0.46	0.4	0.53	0.41	0.48	0.48	0.39	0.44	0.45	0.44	0.448	Mtr	13	12186542	12258113	protein_coding	KNOWN
ENSMUSG00000021314	0.49	0.49	0.49	0.5	0.5	0.49	0.49	0.49	0.48	0.48	0.494	0.486	Amph	13	18948371	19150913	protein_coding	KNOWN
ENSMUSG00000021318	0.42	0.67	0.4	0.58	0.7	0.4	0.41	0.5	0.4	0.44	0.554	0.43	Gli3	13	15463235	15730026	protein_coding	KNOWN
ENSMUSG00000021319	0.42	0.58	0.09	0.42	0.44	0.34	0.37	0.31	0.42	0.5	0.39	0.388	Sfrp4	13	19623175	19632821	protein_coding	KNOWN
ENSMUSG00000021326	0.47	0.39	0.56	0.47	0.41	0.46	0.43	0.49	0.44	0.45	0.46	0.454	Trim27	13	21179445	21194724	protein_coding	KNOWN
ENSMUSG00000021327	0.52	0.52	0.52	0.51	0.5	0.51	0.47	0.52	0.52	0.53	0.514	0.51	Zkscan3	13	21387013	21402755	protein_coding	KNOWN
ENSMUSG00000021337	0.43	0.42	0.41	0.46	0.47	0.43	0.43	0.42	0.44	0.44	0.438	0.432	Scgn	13	23953456	23991214	protein_coding	KNOWN
ENSMUSG00000021338	0.51	0.49	0.46	0.5	0.44	0.52	0.47	0.49	0.48	0.46	0.48	0.484	Lrrc16a	13	24012344	24280795	protein_coding	KNOWN
ENSMUSG00000021339	0.55	0.54	0.47	0.51	0.53	0.52	0.55	0.55	0.53	0.57	0.52	0.544	Mrs2	13	24992483	25020379	protein_coding	KNOWN
ENSMUSG00000021340	0.53	0.55	0.56	0.54	0.52	0.48	0.53	0.5	0.51	0.53	0.54	0.51	Gpld1	13	24943152	24990753	protein_coding	KNOWN
ENSMUSG00000021357	0.44	0.47	0.48	0.52	0.51	0.53	0.5	0.51	0.46	0.48	0.484	0.496	Exoc2	13	30813919	30974047	protein_coding	KNOWN
ENSMUSG00000021360	0.43	0.46	0.43	0.49	0.57	0.44	0.42	0.48	0.45	0.45	0.476	0.448	Gcnt2	13	40859768	40960891	protein_coding	KNOWN
ENSMUSG00000021361	0.49	0.52	0.49	0.53	0.48	0.47	0.48	0.47	0.48	0.5	0.502	0.48	Tmem14c	13	41016250	41022575	protein_coding	KNOWN
ENSMUSG00000021365	0.53	0.55	0.51	0.51	0.54	0.54	0.53	0.51	0.5	0.52	0.528	0.52	Nedd9	13	41309916	41487320	protein_coding	KNOWN
ENSMUSG00000021366	0.52	0.52	0.52	0.53	0.53	0.53	0.55	0.54	0.53	0.5	0.524	0.53	Hivep1	13	42052021	42185026	protein_coding	KNOWN
ENSMUSG00000021367	0.44	0.4	0.68	0.59	0.39	0.51	0.55	0.51	0.51	0.53	0.5	0.522	Edn1	13	42301270	42307989	protein_coding	KNOWN
ENSMUSG00000021368	0.38	0.38	0.48	0.44	0.45	0.41	0.4	0.42	0.42	0.41	0.426	0.412	Tbc1d7	13	43151744	43171501	protein_coding	KNOWN
ENSMUSG00000021371	0.61	0.63	0.59	0.61	0.59	0.62	0.63	0.62	0.6	0.62	0.606	0.618	Ccdc90a	13	43538412	43560191	protein_coding	KNOWN
ENSMUSG00000021373	0.43	0.46	0.45	0.45	0.47	0.44	0.42	0.45	0.43	0.46	0.452	0.44	Cap2	13	46501848	46649642	protein_coding	KNOWN
ENSMUSG00000021374	0.49	0.48	0.48	0.44	0.54	0.46	0.49	0.5	0.51	0.48	0.486	0.488	Nup153	13	46679902	46727849	protein_coding	KNOWN
ENSMUSG00000021375	0.5	0.46	0.44	0.46	0.52	0.47	0.45	0.5	0.46	0.45	0.476	0.466	Kif13a	13	46749087	46929718	protein_coding	KNOWN
ENSMUSG00000021376	0.56	0.6	0.49	0.65	0.57	0.51	0.54	0.47	0.58	0.54	0.574	0.528	Tpmt	13	47025170	47044737	protein_coding	KNOWN
ENSMUSG00000021379	0.6	0.64	0.59	0.62	0.59	0.61	0.61	0.62	0.63	0.59	0.608	0.612	Id4	13	48261427	48264036	protein_coding	KNOWN
ENSMUSG00000021385	0.8	0.74	0.92	0.78	0.66	0.8	0.84	0.74	0.87	0.64	0.78	0.778	Ippk	13	49421311	49462990	protein_coding	KNOWN
ENSMUSG00000021390	0.56	0.55	0.46	0.54	0.42	0.54	0.55	0.55	0.5	0.56	0.506	0.54	Ogn	13	49608071	49624500	protein_coding	KNOWN
[truncated: 9,419 more rows]

## Sheet: MOE_B6AlleleRatio
Gene_ID	M1_MOE	M2_MOE	M3_MOE	M4_MOE	M5_MOE	S1_MOE	S2_MOE	S3_MOE	S4_MOE	S5_MOE	B6.M.mean.moe	B6.S.mean.moe	Associated_Gene_Name	Chromosome_Name	GeneStart.bp.	GeneEnd.bp.	GeneBiotype	Status.gene.
ENSMUSG00000024900	0.5	0.42	0.5	0.51	0.45	0.5	0.57	0.49	0.49	0.49	0.476	0.508	Cpt1a	19	3323301	3385732	protein_coding	KNOWN
ENSMUSG00000035372	0.46	0.57	0.56	0.48	0.52	0.52	0.52	0.57	0.59	0.51	0.518	0.542	1810055G02Rik	19	3708333	3717881	protein_coding	KNOWN
ENSMUSG00000024843	0.42	0.53	0.6	0.4	0.38	0.49	0.56	0.52	0.49	0.45	0.466	0.502	Chka	19	3851773	3894369	protein_coding	KNOWN
ENSMUSG00000059734	0.53	0.51	0.53	0.48	0.51	0.49	0.51	0.52	0.48	0.51	0.512	0.502	Ndufs8	19	3908870	3912717	protein_coding	KNOWN
ENSMUSG00000024885	0.5	0.54	0.5	0.5	0.49	0.51	0.49	0.49	0.51	0.5	0.506	0.5	Aldh3b1	19	3913493	3929761	protein_coding	KNOWN
ENSMUSG00000036908	0.47	0.52	0.49	0.46	0.48	0.46	0.46	0.52	0.46	0.47	0.484	0.474	Unc93b1	19	3935186	3949340	protein_coding	KNOWN
ENSMUSG00000075296	0.63	0.93	0.69	0.6	0.63	0.9	0.79	0.89	0.87	0.85	0.696	0.86	Aldh3b2	19	3972328	3981645	protein_coding	KNOWN
ENSMUSG00000024866	0.4	0.45	0.55	0.45	0.56	0.57	0.46	0.51	0.43	0.52	0.482	0.498	Acy3	19	3986661	3990007	protein_coding	KNOWN
ENSMUSG00000024869	0.52	0.57	0.51	0.61	0.57	0.52	0.55	0.51	0.49	0.52	0.556	0.518	Nudt8	19	4000580	4005816	protein_coding	KNOWN
ENSMUSG00000024871	0.63	0.61	0.67	0.55	0.6	0.64	0.59	0.52	0.54	0.64	0.612	0.586	Doc2g	19	4003321	4007005	protein_coding	KNOWN
ENSMUSG00000037916	0.53	0.53	0.55	0.51	0.53	0.52	0.55	0.54	0.52	0.52	0.53	0.53	Ndufv1	19	4007497	4012806	protein_coding	KNOWN
ENSMUSG00000060803	0.44	0.44	0.48	0.51	0.4	0.47	0.48	0.45	0.49	0.48	0.454	0.474	Gstp1	19	4035411	4037912	protein_coding	KNOWN
ENSMUSG00000038155	0.01	0.33	0.27	0.08	0	0.21	0.03	0.08	0.17	0	0.138	0.098	Gstp2	19	4040351	4042165	protein_coding	KNOWN
ENSMUSG00000024856	0.52	0.52	0.49	0.52	0.48	0.54	0.53	0.5	0.53	0.52	0.506	0.524	Cdk2ap2	19	4097182	4099019	protein_coding	KNOWN
ENSMUSG00000024851	0.44	0.5	0.51	0.5	0.5	0.51	0.48	0.47	0.52	0.49	0.49	0.494	Pitpnm1	19	4099998	4113965	protein_coding	KNOWN
ENSMUSG00000024845	0.3	0.28	0.34	0.31	0.29	0.32	0.33	0.34	0.26	0.31	0.304	0.312	Tmem134	19	4125934	4132307	processed_transcript	KNOWN
ENSMUSG00000024842	0.28	0.23	0.32	0.38	0.2	0.26	0.27	0.22	0.2	0.21	0.282	0.232	Cabp4	19	4135425	4139609	protein_coding	KNOWN
ENSMUSG00000044724	0.47	0.55	0.49	0.55	0.44	0.51	0.55	0.48	0.44	0.4	0.5	0.476	Gpr152	19	4139799	4145738	protein_coding	KNOWN
ENSMUSG00000024835	0.49	0.49	0.5	0.54	0.51	0.51	0.53	0.52	0.5	0.52	0.506	0.516	Coro1b	19	4148619	4154035	protein_coding	KNOWN
ENSMUSG00000045826	0.55	0.44	0.44	0.43	0.44	0.35	0.42	0.4	0.56	0.56	0.46	0.458	Ptprcap	19	4154606	4156751	protein_coding	KNOWN
ENSMUSG00000024830	0.65	0.64	0.6	0.49	0.48	0.56	0.53	0.56	0.45	0.57	0.572	0.534	Rps6kb2	19	4156713	4163354	protein_coding	KNOWN
ENSMUSG00000075289	0.54	0.53	0.55	0.55	0.53	0.54	0.54	0.54	0.54	0.54	0.54	0.54	Carns1	19	4164324	4175479	protein_coding	KNOWN
ENSMUSG00000040247	0.55	0.58	0.66	0.66	0.53	0.63	0.59	0.58	0.56	0.63	0.596	0.598	Tbc1d10c	19	4184358	4191047	protein_coding	KNOWN
ENSMUSG00000040385	0.49	0.49	0.45	0.51	0.5	0.49	0.53	0.51	0.51	0.53	0.488	0.514	Ppp1ca	19	4192158	4195419	protein_coding	KNOWN
ENSMUSG00000024824	0.56	0.57	0.57	0.58	0.57	0.65	0.56	0.58	0.59	0.52	0.57	0.58	Rad9	19	4195198	4201603	protein_coding	KNOWN
ENSMUSG00000024854	0.38	0.47	0.53	0.54	0.45	0.49	0.43	0.47	0.48	0.46	0.474	0.466	Pold4	19	4231899	4233631	protein_coding	KNOWN
ENSMUSG00000041845	0.63	0.53	0.59	0.6	0.55	0.47	0.53	0.55	0.52	0.54	0.58	0.522	Rhod	19	4425459	4439432	protein_coding	KNOWN
ENSMUSG00000049303	0.3	0.35	0.3	0.37	0.38	0.38	0.41	0.4	0.44	0.34	0.34	0.394	Syt12	19	4445908	4477447	protein_coding	KNOWN
ENSMUSG00000024889	0.51	0.53	0.51	0.47	0.47	0.52	0.49	0.55	0.53	0.48	0.498	0.514	Rce1	19	4622551	4625617	protein_coding	KNOWN
ENSMUSG00000067889	0.46	0.5	0.52	0.49	0.43	0.54	0.46	0.49	0.46	0.48	0.48	0.486	Spnb3	19	4711208	4752353	protein_coding	KNOWN
ENSMUSG00000096370	0.6	0.47	0.54	0.37	0.39	0.43	0.46	0.55	0.48	0.45	0.474	0.474	RP24-245M20.2	19	4742913	4811612	protein_coding	NOVEL
ENSMUSG00000033760	0.4	0.51	0.47	0.5	0.53	0.55	0.47	0.5	0.47	0.56	0.482	0.51	Rbm4b	19	4756525	4765938	protein_coding	KNOWN
ENSMUSG00000094936	0.46	0.49	0.49	0.47	0.45	0.51	0.5	0.5	0.53	0.49	0.472	0.506	Rbm4	19	4784293	4793901	protein_coding	KNOWN
ENSMUSG00000006456	0.49	0.63	0.46	0.42	0.45	0.53	0.53	0.5	0.54	0.46	0.49	0.512	Rbm14	19	4800569	4811634	protein_coding	KNOWN
ENSMUSG00000034108	0.43	0.46	0.39	0.44	0.42	0.44	0.43	0.41	0.43	0.42	0.428	0.426	Ccs	19	4825366	4839322	protein_coding	KNOWN
ENSMUSG00000067872	0.45	0.41	0.4	0.43	0.43	0.36	0.44	0.37	0.39	0.41	0.424	0.394	Ccdc87	19	4839366	4842528	protein_coding	KNOWN
ENSMUSG00000083282	0.34	0.4	0.35	0.4	0.33	0.36	0.36	0.36	0.36	0.36	0.364	0.36	Ctsf	19	4855129	4860912	protein_coding	KNOWN
ENSMUSG00000006457	0.41	0.37	0.2	0.08	0.37	0.15	0.18	0.23	0.43	0.31	0.286	0.26	Actn3	19	4861223	4877909	protein_coding	KNOWN
ENSMUSG00000006463	0.46	0.45	0.49	0.45	0.45	0.46	0.44	0.45	0.46	0.44	0.46	0.45	Zdhhc24	19	4878668	4885397	protein_coding	KNOWN
ENSMUSG00000006464	0.5	0.5	0.51	0.5	0.49	0.47	0.49	0.5	0.5	0.5	0.5	0.492	Bbs1	19	4886898	4906627	protein_coding	KNOWN
ENSMUSG00000063904	0.51	0.52	0.53	0.52	0.51	0.55	0.52	0.5	0.53	0.53	0.518	0.526	Dpp3	19	4907229	4928287	protein_coding	KNOWN
ENSMUSG00000024901	0.4	0.51	0.49	0.45	0.41	0.52	0.47	0.47	0.48	0.39	0.452	0.466	Peli3	19	4930651	4943127	protein_coding	KNOWN
ENSMUSG00000024902	0.47	0.55	0.51	0.49	0.6	0.54	0.58	0.53	0.55	0.55	0.524	0.55	Mrpl11	19	4962306	4966995	protein_coding	KNOWN
ENSMUSG00000045903	1	0.38	0.82	0.4	0.6	0.8	0.67	0.56	0.44	0.43	0.64	0.58	Npas4	19	4984355	4989971	protein_coding	KNOWN
ENSMUSG00000024891	0.38	0.49	0.38	0.33	0.39	0.43	0.38	0.45	0.41	0.46	0.394	0.426	Slc29a2	19	5024006	5031971	protein_coding	KNOWN
ENSMUSG00000047379	0.5	0.53	0.51	0.5	0.52	0.45	0.49	0.51	0.4	0.46	0.512	0.462	B3gnt1	19	5038826	5041134	protein_coding	KNOWN
ENSMUSG00000024883	0.41	0.56	0.57	0.53	0.47	0.53	0.5	0.62	0.46	0.57	0.508	0.536	Rin1	19	5050808	5057071	protein_coding	KNOWN
ENSMUSG00000056481	0.67	0.3	0.35	0.22	0.67	0.48	0.48	0.47	0.7	0.47	0.442	0.52	Cd248	19	5068078	5070637	protein_coding	KNOWN
ENSMUSG00000061451	0.47	0.49	0.54	0.53	0.56	0.45	0.51	0.46	0.47	0.48	0.518	0.474	Tmem151a	19	5070859	5085531	protein_coding	KNOWN
ENSMUSG00000024875	0.34	0.41	0.57	0.57	0.29	0.52	0.48	0.52	0.38	0.48	0.436	0.476	Yif1a	19	5088538	5092879	protein_coding	KNOWN
ENSMUSG00000024873	0.5	0.56	0.46	0.51	0.56	0.59	0.53	0.55	0.57	0.51	0.518	0.55	Cnih2	19	5092871	5098418	protein_coding	KNOWN
ENSMUSG00000024870	0.47	0.5	0.48	0.48	0.48	0.49	0.46	0.47	0.45	0.47	0.482	0.468	Rab1b	19	5099207	5106996	protein_coding	KNOWN
ENSMUSG00000024862	0.48	0.47	0.56	0.42	0.48	0.5	0.53	0.53	0.56	0.53	0.482	0.53	Klc2	19	5107746	5118560	protein_coding	KNOWN
ENSMUSG00000024855	0.51	0.51	0.53	0.37	0.38	0.48	0.56	0.46	0.48	0.51	0.46	0.498	Pacs1	19	5133688	5273119	protein_coding	KNOWN
ENSMUSG00000024853	0.52	0.52	0.47	0.52	0.53	0.5	0.48	0.55	0.47	0.51	0.512	0.502	Sf3b2	19	5273923	5295455	protein_coding	KNOWN
ENSMUSG00000047658	0.61	0.53	0.53	0.66	0.65	0.48	0.55	0.63	0.64	0.6	0.596	0.58	Gal3st3	19	5298331	5308738	protein_coding	KNOWN
ENSMUSG00000024846	0.5	0.4	0.4	0.41	0.34	0.42	0.39	0.53	0.35	0.34	0.41	0.406	Cst6	19	5344705	5349574	protein_coding	KNOWN
ENSMUSG00000024841	0.48	0.57	0.54	0.5	0.54	0.49	0.55	0.53	0.57	0.55	0.526	0.538	Eif1ad	19	5366813	5371511	protein_coding	KNOWN
ENSMUSG00000039148	0.47	0.5	0.45	0.5	0.54	0.54	0.53	0.53	0.48	0.54	0.492	0.524	Sart1	19	5377523	5388703	protein_coding	KNOWN
ENSMUSG00000086938	NA	1	1	1	1	1	0.99	1	1	1	NA	0.998	4930481A15Rik	19	5406740	5422847	protein_coding	NOVEL
ENSMUSG00000024914	0.52	0.46	0.46	0.45	0.47	0.44	0.49	0.51	0.51	0.49	0.472	0.488	Drap1	19	5422805	5424979	protein_coding	KNOWN
ENSMUSG00000024912	0.58	0.42	0.44	0.44	0.53	0.46	0.45	0.48	0.5	0.49	0.482	0.476	Fosl1	19	5447703	5455945	protein_coding	KNOWN
ENSMUSG00000024911	0.49	0.43	0.51	0.46	0.48	0.5	0.51	0.52	0.45	0.48	0.474	0.492	Fibp	19	5460607	5465052	protein_coding	KNOWN
ENSMUSG00000024906	0.5	0.55	0.46	0.53	0.55	0.48	0.55	0.57	0.57	0.57	0.518	0.548	Mus81	19	5482345	5488402	protein_coding	KNOWN
ENSMUSG00000056201	0.57	0.55	0.57	0.56	0.59	0.6	0.6	0.62	0.6	0.61	0.568	0.606	Cfl1	19	5490485	5494029	protein_coding	KNOWN
ENSMUSG00000056185	0.67	0.43	0.59	0.72	0.6	0.62	0.5	0.52	0.58	0.54	0.602	0.552	Snx32	19	5495278	5510489	protein_coding	KNOWN
ENSMUSG00000024922	0.61	0.62	0.46	0.53	0.61	0.54	0.44	0.33	0.52	0.45	0.566	0.456	Ovol1	19	5549137	5560575	protein_coding	KNOWN
ENSMUSG00000049562	0.48	0.47	0.53	0.53	0.57	0.55	0.53	0.56	0.48	0.52	0.516	0.528	Gm962	19	5568074	5571261	protein_coding	KNOWN
ENSMUSG00000024925	0.59	0.57	0.53	0.54	0.56	0.47	0.57	0.55	0.56	0.57	0.558	0.544	Rnaseh2c	19	5601873	5603439	protein_coding	KNOWN
ENSMUSG00000024926	0.48	0.55	0.46	0.51	0.54	0.5	0.54	0.51	0.48	0.54	0.508	0.514	Kat5	19	5603017	5610094	protein_coding	KNOWN
ENSMUSG00000024927	0.48	0.57	0.54	0.54	0.53	0.52	0.48	0.52	0.51	0.51	0.532	0.508	Rela	19	5637483	5648130	protein_coding	KNOWN
ENSMUSG00000054874	0.51	0.48	0.51	0.5	0.51	0.51	0.49	0.48	0.52	0.51	0.502	0.502	Pcnxl3	19	5664635	5688908	protein_coding	KNOWN
ENSMUSG00000004054	0.54	0.56	0.59	0.49	0.53	0.51	0.55	0.54	0.55	0.52	0.542	0.534	Map3k11	19	5689131	5702862	protein_coding	KNOWN
ENSMUSG00000024937	0.47	0.53	0.49	0.48	0.47	0.5	0.5	0.55	0.55	0.52	0.488	0.524	Ehbp1l1	19	5707376	5726317	protein_coding	KNOWN
ENSMUSG00000079478	0.52	0.48	0.46	0.46	0.55	0.54	0.47	0.5	0.45	0.54	0.494	0.5	Sssca1	19	5728088	5731732	protein_coding	KNOWN
ENSMUSG00000024940	0.51	0.51	0.52	0.5	0.47	0.54	0.5	0.51	0.53	0.53	0.502	0.522	Ltbp3	19	5740904	5758532	protein_coding	KNOWN
ENSMUSG00000024941	0.48	0.47	0.47	0.49	0.47	0.5	0.47	0.5	0.47	0.49	0.476	0.486	Scyl1	19	5758427	5771401	protein_coding	KNOWN
ENSMUSG00000092341	0.49	0.5	0.5	0.49	0.5	0.5	0.49	0.5	0.49	0.5	0.496	0.496	Malat1	19	5795690	5802671	lincRNA	KNOWN
ENSMUSG00000092274	0.48	0.44	0.48	0.5	0.49	0.45	0.45	0.45	0.45	0.46	0.478	0.452	Neat1	19	5824708	5845478	non_coding	KNOWN
ENSMUSG00000024816	0.49	0.46	0.46	0.42	0.42	0.48	0.51	0.47	0.51	0.48	0.45	0.49	Frmd8	19	5849702	5875274	protein_coding	KNOWN
ENSMUSG00000044390	0.33	0.63	0.31	0.5	0.2	0.48	0.32	0.52	0.43	0.29	0.394	0.408	Tigd3	19	5891139	5894107	protein_coding	KNOWN
ENSMUSG00000024826	0.48	0.47	0.49	0.51	0.53	0.48	0.49	0.48	0.47	0.48	0.496	0.48	Dpf2	19	5896516	5913010	protein_coding	KNOWN
ENSMUSG00000045664	0.44	0.45	0.45	0.48	0.44	0.43	0.44	0.45	0.41	0.4	0.452	0.426	Cdc42ep2	19	5917556	5924816	protein_coding	KNOWN
ENSMUSG00000024833	0.53	0.47	0.52	0.43	0.49	0.56	0.45	0.48	0.52	0.6	0.488	0.522	Pola2	19	5940543	5964206	protein_coding	KNOWN
ENSMUSG00000037451	0.41	0.43	0.43	0.43	0.43	0.43	0.43	0.44	0.43	0.42	0.426	0.43	Slc22a20	19	5970234	5986143	protein_coding	KNOWN
ENSMUSG00000024942	0.52	0.48	0.48	0.51	0.5	0.49	0.51	0.52	0.49	0.51	0.498	0.504	Capn1	19	5988546	6015825	protein_coding	KNOWN
ENSMUSG00000024807	0.51	0.5	0.5	0.45	0.52	0.5	0.48	0.49	0.49	0.5	0.496	0.492	Syvn1	19	6046576	6053712	protein_coding	KNOWN
ENSMUSG00000007338	0.49	0.5	0.48	0.43	0.44	0.5	0.49	0.52	0.49	0.49	0.468	0.498	Mrpl49	19	6053630	6057751	protein_coding	KNOWN
ENSMUSG00000038274	0.05	0.1	0.06	0.05	0.07	0.08	0.06	0.09	0.08	0.07	0.066	0.076	Fau	19	6057888	6059524	protein_coding	KNOWN
ENSMUSG00000075227	0.59	0.49	0.5	0.45	0.4	0.54	0.44	0.47	0.43	0.55	0.486	0.486	Znhit2	19	6061192	6062470	protein_coding	KNOWN
ENSMUSG00000024799	0.45	0.48	0.53	0.47	0.51	0.51	0.5	0.45	0.47	0.53	0.488	0.492	Tm7sf2	19	6062821	6068373	protein_coding	KNOWN
ENSMUSG00000024797	0.52	0.58	0.5	0.51	0.49	0.52	0.49	0.5	0.5	0.47	0.52	0.496	1110014N23Rik	19	6067842	6080324	protein_coding	KNOWN
ENSMUSG00000024790	0.42	0.52	0.52	0.6	0.58	0.51	0.52	0.51	0.51	0.51	0.528	0.512	Sac3d1	19	6116004	6118586	protein_coding	KNOWN
ENSMUSG00000024787	0.59	0.41	0.53	0.53	0.44	0.42	0.48	0.48	0.54	0.53	0.5	0.49	Snx15	19	6119399	6128304	protein_coding	KNOWN
ENSMUSG00000024944	0.47	0.48	0.45	0.4	0.44	0.44	0.44	0.45	0.45	0.41	0.448	0.438	Arl2	19	6134374	6141406	protein_coding	KNOWN
ENSMUSG00000024777	0.48	0.5	0.5	0.47	0.48	0.48	0.48	0.48	0.47	0.48	0.486	0.478	Ppp2r5b	19	6227765	6235872	protein_coding	KNOWN
ENSMUSG00000024773	0.47	0.45	0.49	0.46	0.47	0.48	0.45	0.51	0.46	0.48	0.468	0.476	Atg2a	19	6241668	6262335	protein_coding	KNOWN
ENSMUSG00000085196	0.93	0.87	0.85	0.9	0.93	0.96	0.92	0.87	1	1	0.896	0.95	Gm14963	19	6268795	6276605	lincRNA	NOVEL
ENSMUSG00000024772	0.54	0.57	0.56	0.57	0.57	0.55	0.53	0.54	0.56	0.55	0.562	0.546	Ehd1	19	6276725	6300096	protein_coding	KNOWN
ENSMUSG00000024769	0.51	0.43	0.5	0.46	0.49	0.48	0.5	0.47	0.46	0.5	0.478	0.482	Cdc42bpg	19	6306456	6325652	protein_coding	KNOWN
ENSMUSG00000024948	0.61	0.62	0.61	0.6	0.62	0.64	0.57	0.6	0.61	0.57	0.612	0.598	Map4k2	19	6341135	6355615	protein_coding	KNOWN
ENSMUSG00000024949	0.5	0.47	0.49	0.48	0.49	0.5	0.48	0.5	0.49	0.47	0.486	0.488	Sf1	19	6363690	6378030	protein_coding	KNOWN
ENSMUSG00000032648	0.41	0.56	0.49	0.63	0.27	0.42	0.58	0.46	0.52	0.5	0.472	0.496	Pygm	19	6384399	6398459	protein_coding	KNOWN
ENSMUSG00000032946	0.44	0.55	0.38	0.35	0.52	0.51	0.41	0.67	0.39	0.46	0.448	0.488	Rasgrp2	19	6399340	6415216	protein_coding	KNOWN
ENSMUSG00000047810	0.47	0.32	0.29	0.19	0.19	0.31	0.3	0.37	0.35	0.3	0.292	0.326	Ccdc88b	19	6844623	6858211	protein_coding	KNOWN
ENSMUSG00000024953	0.62	0.55	0.61	0.65	0.59	0.59	0.58	0.54	0.58	0.58	0.604	0.574	Prdx5	19	6906697	6910106	protein_coding	KNOWN
ENSMUSG00000024955	0.44	0.51	0.52	0.51	0.55	0.52	0.51	0.51	0.49	0.49	0.506	0.504	Esrra	19	6910977	6921813	protein_coding	KNOWN
ENSMUSG00000024958	0.46	0.46	0.46	0.47	0.51	0.48	0.45	0.46	0.43	0.52	0.472	0.468	Gpr137	19	6938069	6942450	protein_coding	KNOWN
ENSMUSG00000024959	0.57	0.59	0.61	0.54	0.59	0.58	0.61	0.6	0.6	0.59	0.58	0.596	Bad	19	6941861	6951898	protein_coding	KNOWN
ENSMUSG00000024960	0.52	0.57	0.53	0.5	0.58	0.51	0.52	0.51	0.5	0.55	0.54	0.518	Plcb3	19	6953714	6969759	protein_coding	KNOWN
ENSMUSG00000024963	0.42	0.58	0.42	0.55	0.39	0.49	0.48	0.47	0.46	0.44	0.472	0.468	Dnajc4	19	6987911	6992503	protein_coding	KNOWN
ENSMUSG00000037349	0.41	0.38	0.41	0.41	0.44	0.39	0.41	0.49	0.45	0.44	0.41	0.436	Nudt22	19	6993019	6996037	protein_coding	KNOWN
ENSMUSG00000047656	0.4	0.36	0.38	0.55	0.52	0.43	0.51	0.46	0.39	0.43	0.442	0.444	Trpt1	19	6996131	6999044	protein_coding	KNOWN
ENSMUSG00000024965	0.68	0.55	0.59	0.63	0.38	0.42	0.38	0.47	0.49	0.51	0.566	0.454	Fermt3	19	6998958	7019469	protein_coding	KNOWN
ENSMUSG00000024966	0.52	0.5	0.52	0.53	0.54	0.5	0.49	0.52	0.51	0.52	0.522	0.508	Stip1	19	7020696	7040026	protein_coding	KNOWN
ENSMUSG00000036278	0.53	0.52	0.51	0.54	0.51	0.53	0.52	0.5	0.51	0.48	0.522	0.508	Macrod1	19	7056768	7198061	protein_coding	KNOWN
ENSMUSG00000047787	0.53	0.54	0.51	0.54	0.53	0.52	0.53	0.53	0.53	0.52	0.53	0.526	Flrt1	19	7092014	7105729	protein_coding	KNOWN
ENSMUSG00000024767	0.47	0.51	0.46	0.52	0.47	0.51	0.46	0.47	0.46	0.46	0.486	0.472	Otub1	19	7198202	7206316	protein_coding	KNOWN
ENSMUSG00000035885	0.49	0.5	0.48	0.49	0.51	0.49	0.5	0.49	0.5	0.49	0.494	0.494	Cox8a	19	7215158	7217616	protein_coding	KNOWN
ENSMUSG00000024764	0.48	0.49	0.49	0.54	0.52	0.5	0.46	0.49	0.52	0.48	0.504	0.49	Naa40	19	7225668	7241222	protein_coding	KNOWN
ENSMUSG00000024969	0.59	0.56	0.56	0.55	0.58	0.57	0.61	0.58	0.54	0.61	0.568	0.582	Mark2	19	7275396	7341860	protein_coding	KNOWN
ENSMUSG00000024970	0.47	0.55	0.5	0.55	0.63	0.59	0.51	0.51	0.55	0.55	0.54	0.542	AI846148	19	7356464	7383026	protein_coding	KNOWN
ENSMUSG00000053080	0.52	0.51	0.5	0.57	0.48	0.46	0.51	0.53	0.46	0.5	0.516	0.492	2700081O15Rik	19	7417625	7425904	protein_coding	KNOWN
ENSMUSG00000060675	0.51	0.56	0.54	0.52	0.52	0.56	0.54	0.54	0.54	0.56	0.53	0.548	Pla2g16	19	7557459	7588545	protein_coding	KNOWN
ENSMUSG00000024650	0.47	0.67	0.43	0.47	0.5	0.69	0.63	0.71	0.55	0.76	0.508	0.668	Slc22a6	19	8617996	8628299	protein_coding	KNOWN
ENSMUSG00000010095	0.46	0.49	0.49	0.49	0.49	0.48	0.48	0.49	0.48	0.47	0.484	0.48	Slc3a2	19	8706882	8723369	protein_coding	KNOWN
ENSMUSG00000042729	0.62	0.51	0.6	0.55	0.54	0.54	0.51	0.5	0.59	0.5	0.564	0.528	Wdr74	19	8735839	8740623	protein_coding	KNOWN
ENSMUSG00000010110	0.48	0.55	0.51	0.58	0.49	0.48	0.59	0.5	0.53	0.51	0.522	0.522	Stx5a	19	8741413	8756069	protein_coding	KNOWN
ENSMUSG00000010097	0.46	0.49	0.52	0.51	0.53	0.48	0.55	0.51	0.5	0.51	0.502	0.51	Nxf1	19	8757103	8770909	protein_coding	KNOWN
ENSMUSG00000075043	0.55	0.55	0.5	0.58	0.5	0.51	0.53	0.52	0.46	0.5	0.536	0.504	Tmem223	19	8770996	8772475	protein_coding	KNOWN
ENSMUSG00000079437	0.44	0.49	0.47	0.44	0.42	0.49	0.47	0.45	0.48	0.43	0.452	0.464	Tmem179b	19	8772522	8774467	protein_coding	KNOWN
ENSMUSG00000003680	0.48	0.47	0.5	0.47	0.41	0.48	0.47	0.53	0.48	0.55	0.466	0.502	Taf6l	19	8774354	8786417	protein_coding	KNOWN
ENSMUSG00000071662	0.45	0.41	0.56	0.55	0.55	0.55	0.54	0.57	0.53	0.53	0.504	0.544	Polr2g	19	8793129	8798557	protein_coding	KNOWN
ENSMUSG00000071661	0.31	0.38	0.5	0.5	0.33	0.5	0.54	0.66	0.51	0.61	0.404	0.564	Zbtb3	19	8802530	8804854	protein_coding	KNOWN
ENSMUSG00000071660	0.54	0.55	0.53	0.55	0.54	0.53	0.54	0.51	0.54	0.52	0.542	0.528	Ttc9c	19	8809075	8819333	protein_coding	KNOWN
ENSMUSG00000071659	0.51	0.54	0.53	0.55	0.51	0.53	0.53	0.52	0.51	0.53	0.528	0.524	Hnrnpul2	19	8819401	8834142	protein_coding	KNOWN
ENSMUSG00000071658	0.47	0.51	0.41	0.44	0.39	0.51	0.48	0.52	0.44	0.47	0.444	0.484	Gng3	19	8836929	8839246	protein_coding	KNOWN
ENSMUSG00000071657	0.48	0.46	0.47	0.42	0.44	0.44	0.51	0.5	0.47	0.44	0.454	0.472	Bscl2	19	8837467	8848683	protein_coding	KNOWN
ENSMUSG00000071656	0.75	0.6	1	0	0.75	0.5	0.67	0.73	0.69	0.54	0.62	0.626	Lrrn4cl	19	8850785	8853909	protein_coding	KNOWN
ENSMUSG00000071654	0.41	0.43	0.51	0.41	0.51	0.48	0.4	0.42	0.44	0.49	0.454	0.446	AI462493	19	8880016	8880933	protein_coding	KNOWN
ENSMUSG00000071653	0.49	0.52	0.51	0.44	0.54	0.5	0.52	0.46	0.49	0.42	0.5	0.478	1810009A15Rik	19	8888903	8890740	protein_coding	KNOWN
ENSMUSG00000071652	0.44	0.47	0.46	0.53	0.5	0.47	0.44	0.48	0.5	0.48	0.48	0.474	Ints5	19	8892987	8897890	protein_coding	KNOWN
ENSMUSG00000071650	0.47	0.48	0.47	0.45	0.47	0.48	0.43	0.47	0.48	0.46	0.468	0.464	Ganab	19	8898090	8916663	protein_coding	KNOWN
ENSMUSG00000071649	0.49	0.5	0.48	0.49	0.49	0.48	0.47	0.47	0.48	0.49	0.49	0.478	B3gat3	19	8920374	8927234	protein_coding	KNOWN
ENSMUSG00000071648	0.6	0.33	0.48	0.57	0.6	0.45	0.37	0.33	0.5	0.45	0.516	0.42	Rom1	19	8927382	8929356	protein_coding	KNOWN
ENSMUSG00000071647	0.52	0.44	0.55	0.5	0.56	0.53	0.55	0.5	0.52	0.47	0.514	0.514	Eml3	19	8929694	8941563	protein_coding	KNOWN
ENSMUSG00000071646	0.51	0.53	0.51	0.53	0.52	0.48	0.49	0.48	0.51	0.51	0.52	0.494	Mta2	19	8941875	8952303	protein_coding	KNOWN
ENSMUSG00000071645	0.49	0.56	0.6	0.48	0.44	0.49	0.46	0.44	0.47	0.57	0.514	0.486	Tut1	19	8953850	8966207	protein_coding	KNOWN
ENSMUSG00000071644	0.52	0.56	0.52	0.52	0.52	0.52	0.52	0.52	0.51	0.5	0.528	0.514	Eef1g	19	8967041	8978479	protein_coding	KNOWN
ENSMUSG00000069833	0.53	0.52	0.57	0.52	0.53	0.54	0.54	0.55	0.52	0.55	0.534	0.54	Ahnak	19	8989284	9076919	protein_coding	KNOWN
ENSMUSG00000024654	0.65	0.66	0.57	0.57	0.64	0.65	0.62	0.63	0.63	0.57	0.618	0.62	Asrgl1	19	9109868	9135636	protein_coding	KNOWN
ENSMUSG00000024660	0.19	0.57	0.34	0.55	0.45	0.56	0.48	0.53	0.44	0.42	0.42	0.486	Incenp	19	9872297	9899533	protein_coding	KNOWN
ENSMUSG00000024664	0.51	0.53	0.52	0.68	0.4	0.56	0.57	0.55	0.52	0.53	0.528	0.546	Fads3	19	10041548	10059671	protein_coding	KNOWN
ENSMUSG00000024665	0.56	0.5	0.47	0.41	0.46	0.49	0.5	0.48	0.5	0.48	0.48	0.49	Fads2	19	10064164	10101503	protein_coding	KNOWN
ENSMUSG00000010663	0.51	0.5	0.45	0.46	0.48	0.46	0.47	0.48	0.47	0.46	0.48	0.468	Fads1	19	10182888	10196870	protein_coding	KNOWN
ENSMUSG00000036372	0.51	0.54	0.54	0.55	0.57	0.54	0.55	0.54	0.53	0.56	0.542	0.544	1810006K21Rik	19	10204014	10207824	protein_coding	KNOWN
ENSMUSG00000036098	0.69	0.6	0.62	0.5	0	0.74	0.77	0.56	0.65	0.7	0.482	0.684	Gm98	19	10208272	10240748	protein_coding	KNOWN
ENSMUSG00000024743	0.49	0.52	0.5	0.52	0.49	0.51	0.51	0.51	0.5	0.51	0.504	0.508	Syt7	19	10389090	10453181	protein_coding	KNOWN
ENSMUSG00000090291	0.51	0.51	0.48	0.51	0.48	0.51	0.51	0.5	0.5	0.5	0.498	0.504	Lrrc10b	19	10455371	10457447	protein_coding	KNOWN
ENSMUSG00000035179	0.43	0.45	0.35	0.37	0.59	0.51	0.44	0.37	0.49	0.45	0.438	0.452	Ppp1r32	19	10474257	10482897	protein_coding	KNOWN
ENSMUSG00000024668	0.46	0.5	0.48	0.47	0.46	0.51	0.5	0.45	0.5	0.5	0.474	0.492	Sdhaf2	19	10500513	10525209	protein_coding	KNOWN
ENSMUSG00000034820	0.58	0.54	0.55	0.55	0.58	0.53	0.58	0.56	0.53	0.54	0.56	0.548	Cpsf7	19	10525244	10547735	protein_coding	KNOWN
ENSMUSG00000024667	0.52	0.51	0.6	0.56	0.49	0.52	0.52	0.52	0.53	0.54	0.536	0.526	Tmem216	19	10533865	10556238	protein_coding	KNOWN
ENSMUSG00000024666	0.57	0.56	0.54	0.4	0.53	0.54	0.53	0.56	0.57	0.47	0.52	0.534	Tmem138	19	10570478	10577362	protein_coding	KNOWN
ENSMUSG00000034445	0.66	0.61	0.61	0.6	0.73	0.59	0.64	0.6	0.49	0.49	0.642	0.562	Cybasc3	19	10577454	10588548	protein_coding	KNOWN
ENSMUSG00000034371	0.42	0.42	0.44	0.52	0.52	0.44	0.43	0.44	0.46	0.45	0.464	0.444	Dak	19	10592200	10604258	protein_coding	KNOWN
ENSMUSG00000024740	0.5	0.49	0.5	0.5	0.5	0.52	0.51	0.5	0.51	0.51	0.498	0.51	Ddb1	19	10605625	10629813	protein_coding	KNOWN
ENSMUSG00000048832	0.59	0.49	0.48	0.54	0.53	0.47	0.52	0.5	0.47	0.5	0.526	0.492	Vps37c	19	10688815	10714419	protein_coding	KNOWN
ENSMUSG00000024737	0.2	0.08	0.09	0.1	0.07	0.13	0.16	0.1	0.12	0.13	0.108	0.128	Slc15a3	19	10839727	10859362	protein_coding	KNOWN
ENSMUSG00000024736	0.36	0.33	0.35	0.34	0.38	0.36	0.34	0.34	0.34	0.34	0.352	0.344	Tmem132a	19	10857822	10869940	protein_coding	KNOWN
ENSMUSG00000034659	0.52	0.48	0.5	0.53	0.54	0.46	0.49	0.47	0.5	0.48	0.514	0.48	Tmem109	19	10870660	10882001	protein_coding	KNOWN
ENSMUSG00000024735	0.47	0.48	0.49	0.52	0.48	0.5	0.5	0.48	0.51	0.48	0.488	0.494	Prpf19	19	10888156	10909559	protein_coding	KNOWN
ENSMUSG00000024732	0.57	0.56	0.57	0.53	0.57	0.61	0.67	0.62	0.48	0.57	0.56	0.59	Ccdc86	19	10941481	10949266	protein_coding	KNOWN
ENSMUSG00000067571	0.46	0.49	0.4	0.46	0.3	0	0.54	0.34	0.44	0.52	0.422	0.368	Ms4a15	19	10978307	10993250	protein_coding	KNOWN
ENSMUSG00000024673	0.4	0.78	0.52	0.56	0.62	1	0.6	0.59	0.29	0.86	0.576	0.668	Ms4a1	19	11250603	11266151	protein_coding	KNOWN
ENSMUSG00000079419	0.3	0.4	0.3	0.36	0.37	0.25	0.24	0.23	0.22	0.32	0.346	0.252	Ms4a6c	19	11469368	11482197	protein_coding	KNOWN
ENSMUSG00000024679	0.5	0.33	0.4	1	0.07	0.53	0.62	0.29	0.32	0.28	0.46	0.408	Ms4a6d	19	11586604	11604849	protein_coding	KNOWN
ENSMUSG00000024683	0.46	0.54	0.45	0.42	0.42	0.45	0.54	0.5	0.5	0.48	0.458	0.494	Mrpl16	19	11770415	11774944	protein_coding	KNOWN
ENSMUSG00000041488	0.54	0.47	0.48	0.46	0.49	0.54	0.53	0.53	0.53	0.5	0.488	0.526	Stx3	19	11775119	11819403	protein_coding	KNOWN
ENSMUSG00000048292	0.5	0.44	0.53	0.46	0.4	0.5	0.56	0.44	0.58	0.52	0.466	0.52	Olfr1417	19	11828077	11829024	protein_coding	KNOWN
ENSMUSG00000060556	0.56	0.92	0.8	1	0.81	0.77	0.87	0.75	0.76	0.82	0.818	0.794	Olfr1418	19	11854930	11856001	protein_coding	KNOWN
ENSMUSG00000067545	0.68	0.41	0.43	0.55	0.77	0.5	0.46	0.52	0.5	0.54	0.568	0.504	Olfr1419	19	11870146	11871305	protein_coding	KNOWN
ENSMUSG00000060878	0.19	0.41	0.35	0.41	0.47	0.24	0.32	0.32	0.35	0.27	0.366	0.3	Olfr1420	19	11895999	11897050	protein_coding	KNOWN
ENSMUSG00000046139	0.55	0.57	0.57	0.61	0.6	0.59	0.58	0.58	0.57	0.6	0.58	0.584	Patl1	19	11912399	11945096	protein_coding	KNOWN
ENSMUSG00000024687	0.48	0.5	0.5	0.48	0.52	0.49	0.52	0.51	0.52	0.53	0.496	0.514	Osbp	19	11965844	11994105	protein_coding	KNOWN
ENSMUSG00000067529	0.55	0.41	0.51	0.52	0.47	0.43	0.59	0.49	0.48	0.5	0.492	0.498	Olfr1423	19	12035808	12036740	protein_coding	KNOWN
ENSMUSG00000067528	0.5	0.23	0.37	0.3	0.37	0.45	0.36	0.32	0.32	0.41	0.354	0.372	Olfr1424	19	12058809	12059750	protein_coding	KNOWN
ENSMUSG00000067526	0.71	0.6	0.4	0.64	0.67	0.45	0.45	0.4	0.35	0.36	0.604	0.402	Olfr1425	19	12073695	12074633	protein_coding	KNOWN
ENSMUSG00000044994	0.43	0.43	0.42	0.51	0.37	0.43	0.42	0.45	0.45	0.44	0.432	0.438	Olfr1426	19	12087612	12091847	protein_coding	KNOWN
ENSMUSG00000067525	0.61	0.58	0.58	0.64	0.55	0.61	0.55	0.54	0.6	0.66	0.592	0.592	Olfr1427	19	12098702	12099639	protein_coding	KNOWN
ENSMUSG00000067524	0.4	0.37	0.41	0.36	0.38	0.38	0.39	0.39	0.39	0.42	0.384	0.394	Olfr1428	19	12108600	12109544	protein_coding	KNOWN
ENSMUSG00000067522	0.43	0.27	0.35	0.44	0.15	0.28	0.24	0.44	0.28	0.53	0.328	0.354	Olfr76	19	12119653	12120700	protein_coding	KNOWN
ENSMUSG00000094133	0.24	0.45	0.47	0.28	0.67	0.6	0.54	0.53	0.39	0.29	0.422	0.47	Olfr1431	19	12209568	12210506	protein_coding	KNOWN
ENSMUSG00000060049	0.26	0.39	0.52	0.55	0.57	0.32	0.34	0.38	0.54	0.5	0.458	0.416	Olfr235	19	12268163	12269241	protein_coding	KNOWN
ENSMUSG00000046650	0.53	0.44	0.33	0.5	0.27	0.35	0.52	0.5	0.48	0.7	0.414	0.51	Olfr1440	19	12394265	12395212	protein_coding	KNOWN
ENSMUSG00000050815	0.06	0.02	0.02	0	0.06	0	0	0.03	0	0.02	0.032	0.01	Olfr1441	19	12422265	12423352	protein_coding	KNOWN
ENSMUSG00000046805	0.47	0.45	0.42	0.52	0.48	0.44	0.41	0.46	0.44	0.42	0.468	0.434	Mpeg1	19	12460779	12465284	protein_coding	KNOWN
ENSMUSG00000039982	0.5	0.51	0.48	0.45	0.46	0.49	0.53	0.49	0.49	0.52	0.48	0.504	Dtx4	19	12466341	12501996	protein_coding	KNOWN
ENSMUSG00000086213	0.67	0.76	0.46	0.46	0.46	0.55	0.61	0.48	0.53	0.62	0.562	0.558	A330040F15Rik	19	12585868	12596566	lincRNA	NOVEL
ENSMUSG00000044441	0.39	0.3	0.33	0.32	0.45	0.32	0.33	0.4	0.31	0.38	0.358	0.348	Olfr1442	19	12674179	12675243	protein_coding	KNOWN
ENSMUSG00000045030	0.67	0.68	0.66	0.67	0.62	0.65	0.71	0.65	0.64	0.67	0.66	0.664	Olfr1443	19	12678166	12683843	protein_coding	KNOWN
ENSMUSG00000024695	0.47	0.45	0.47	0.48	0.47	0.46	0.47	0.47	0.45	0.45	0.468	0.46	Zfp91	19	12763660	12796126	protein_coding	KNOWN
ENSMUSG00000024696	0.47	0.47	0.42	0.57	0.52	0.52	0.59	0.44	0.37	0.44	0.49	0.472	Lpxn	19	12798606	12833807	protein_coding	KNOWN
ENSMUSG00000046272	0.54	0.47	0.44	0.4	0.2	0.78	0.55	0.5	0.63	0.81	0.41	0.654	Olfr1444	19	12861742	12862771	protein_coding	KNOWN
ENSMUSG00000048456	0.54	0.75	0.57	0.64	0.81	0.73	0.77	0.64	0.57	0.7	0.662	0.682	Olfr1448	19	12919363	12920307	protein_coding	KNOWN
ENSMUSG00000062892	0.29	0.12	0.06	0.09	0.05	0.07	NA	0.1	0.03	0.14	0.122	NA	Olfr1450	19	12953591	12954568	protein_coding	KNOWN
ENSMUSG00000094986	0.71	0.67	0.5	0	0.67	0.59	0.73	0.82	0.56	0.69	0.51	0.678	Olfr1454	19	13063413	13064336	protein_coding	KNOWN
ENSMUSG00000045883	0.53	0.59	0.75	0.67	0.61	0.6	0.63	0.65	0.69	0.59	0.63	0.632	Olfr1461	19	13165016	13165954	protein_coding	KNOWN
ENSMUSG00000096365	0.61	0.56	0.56	0.53	0.56	0.56	0.6	0.52	0.51	0.56	0.564	0.55	Olfr1463	19	13234252	13235184	protein_coding	KNOWN
ENSMUSG00000096485	0.41	0.38	0.46	0.53	0.42	0.42	0.49	0.46	0.35	0.43	0.44	0.43	Olfr1466	19	13341760	13342692	protein_coding	KNOWN
ENSMUSG00000096320	0.5	0.43	0.53	0.67	0.49	0.57	0.53	0.56	0.54	0.34	0.524	0.508	Olfr1471	19	13445014	13445958	protein_coding	KNOWN
ENSMUSG00000071629	0.37	0.57	0.54	0.55	0.61	0.43	0.49	0.43	0.41	0.47	0.528	0.446	Olfr1477	19	13500546	13503292	protein_coding	KNOWN
ENSMUSG00000096289	0.56	0.7	0.74	0.74	0.82	0.68	0.66	0.68	0.66	0.77	0.712	0.69	Olfr1484	19	13585306	13586253	protein_coding	KNOWN
ENSMUSG00000094846	0.6	0.4	0.6	0.37	0.51	0.4	0.37	0.57	0.42	0.47	0.496	0.446	Olfr1487	19	13619164	13620111	protein_coding	KNOWN
ENSMUSG00000061387	1	0.6	0.56	0.6	0.5	0.64	0.59	0.53	0.63	0.56	0.652	0.59	Olfr1490	19	13654446	13655396	protein_coding	KNOWN
ENSMUSG00000051156	0.5	0.42	0.54	0.4	0.58	0.61	0.33	0.45	0.53	0.5	0.488	0.484	Olfr1491	19	13704829	13705788	protein_coding	KNOWN
ENSMUSG00000050865	0.48	0.48	0.39	0.54	0.28	0.39	0.5	0.36	0.45	0.43	0.434	0.426	Olfr1494	19	13749108	13750055	protein_coding	KNOWN
ENSMUSG00000047207	0.67	0.82	0.71	0.5	0.45	0.54	0.74	0.79	0.93	0.76	0.63	0.752	Olfr1495	19	13768307	13769395	protein_coding	KNOWN
ENSMUSG00000048356	0.53	0.42	0.41	0.43	0.61	0.3	0.62	0.43	0.54	0.52	0.48	0.482	Olfr1496	19	13780548	13781614	protein_coding	KNOWN
ENSMUSG00000054526	0.56	0.48	0.39	0.38	0.25	0.39	0.54	0.47	0.13	0.5	0.412	0.406	Olfr1500	19	13827435	13828459	protein_coding	KNOWN
ENSMUSG00000057270	0.43	0.41	0.46	0.19	0.33	0.38	0.33	0.42	0.38	0.33	0.364	0.368	Olfr1501	19	13838224	13839171	protein_coding	KNOWN
ENSMUSG00000024642	0.45	0.57	0.49	0.56	0.57	0.52	0.51	0.54	0.56	0.48	0.528	0.522	Tle4	19	14448072	14598051	protein_coding	KNOWN
ENSMUSG00000024640	0.52	0.53	0.47	0.5	0.47	0.49	0.47	0.48	0.49	0.47	0.498	0.48	Psat1	19	15904678	15947337	protein_coding	KNOWN
ENSMUSG00000041491	0.47	0.47	0.49	0.53	0.46	0.48	0.52	0.49	0.53	0.48	0.484	0.5	Cep78	19	15955774	15984989	protein_coding	KNOWN
ENSMUSG00000024639	0.45	0.48	0.48	0.44	0.45	0.45	0.49	0.47	0.48	0.46	0.46	0.47	Gnaq	19	16132831	16387463	protein_coding	KNOWN
ENSMUSG00000024697	0.44	0.45	0.45	0.46	0.54	0.41	0.42	0.45	0.43	0.38	0.468	0.418	Gna14	19	16435667	16610818	protein_coding	KNOWN
ENSMUSG00000046230	0.45	0.51	0.44	0.43	0.47	0.49	0.45	0.46	0.5	0.42	0.46	0.464	Vps13a	19	16616763	16780822	protein_coding	KNOWN
ENSMUSG00000039126	0.5	0.52	0.53	0.52	0.57	0.52	0.51	0.52	0.48	0.53	0.528	0.512	Prune2	19	16956118	17223932	protein_coding	KNOWN
ENSMUSG00000024712	0.6	0.61	0.6	0.59	0.59	0.6	0.59	0.59	0.6	0.59	0.598	0.594	Rfk	19	17394043	17401349	protein_coding	KNOWN
ENSMUSG00000024713	0.57	0.56	0.48	0.46	0.45	0.53	0.62	0.55	0.56	0.46	0.504	0.544	Pcsk5	19	17432832	17837632	protein_coding	KNOWN
ENSMUSG00000024725	0.45	0.48	0.47	0.46	0.46	0.47	0.45	0.48	0.45	0.47	0.464	0.464	Ostf1	19	18579328	18631789	protein_coding	KNOWN
ENSMUSG00000037847	0.43	0.46	0.49	0.43	0.44	0.46	0.43	0.45	0.46	0.47	0.45	0.454	Nmrk1	19	18631950	18652194	protein_coding	KNOWN
ENSMUSG00000024726	0.49	0.58	0.49	0.48	0.52	0.48	0.47	0.54	0.5	0.48	0.512	0.494	2410127L17Rik	19	18670780	18704788	protein_coding	KNOWN
ENSMUSG00000047044	0.48	0.52	0.49	0.51	0.49	0.52	0.51	0.55	0.5	0.48	0.498	0.512	D030056L22Rik	19	18713193	18718428	protein_coding	KNOWN
ENSMUSG00000024727	0.67	0.69	0.52	0.48	0.47	0.59	0.52	0.52	0.45	0.53	0.566	0.522	Trpm6	19	18749983	18892510	protein_coding	KNOWN
ENSMUSG00000024659	0.51	0.52	0.51	0.53	0.51	0.48	0.48	0.5	0.51	0.47	0.516	0.488	Anxa1	19	20373428	20390944	protein_coding	KNOWN
ENSMUSG00000053279	0.56	0.68	0.62	0.58	0.59	0.65	0.65	0.68	0.65	0.68	0.606	0.662	Aldh1a1	19	20601961	20643462	protein_coding	KNOWN
ENSMUSG00000024747	0.88	0.9	0.9	0.89	0.89	0.88	0.9	0.9	0.88	0.89	0.892	0.89	Aldh1a7	19	20692953	20727562	protein_coding	KNOWN
ENSMUSG00000024750	0.59	0.53	0.53	0.54	0.57	0.55	0.55	0.57	0.54	0.58	0.552	0.558	Zfand5	19	21272278	21282289	protein_coding	KNOWN
ENSMUSG00000058624	0.42	0.37	0.41	0.47	0.46	0.36	0.4	0.36	0.36	0.37	0.426	0.37	Gda	19	21391307	21473445	protein_coding	KNOWN
ENSMUSG00000035171	0.51	0.46	0.43	0.41	0.36	0.45	0.45	0.37	0.38	0.44	0.434	0.418	1110059E24Rik	19	21581202	21652976	protein_coding	KNOWN
ENSMUSG00000047368	0.48	0.41	0.47	0.55	0.49	0.43	0.47	0.48	0.5	0.49	0.48	0.474	Fam108b	19	21653309	21685637	protein_coding	KNOWN
ENSMUSG00000033863	0.56	0.51	0.5	0.55	0.49	0.61	0.58	0.54	0.55	0.72	0.522	0.6	Klf9	19	23141226	23166911	protein_coding	KNOWN
ENSMUSG00000024943	0.51	0.51	0.45	0.46	0.48	0.5	0.44	0.48	0.49	0.47	0.482	0.476	Smc5	19	23206441	23273897	protein_coding	KNOWN
ENSMUSG00000033207	0.42	0.4	0.38	0.35	0.4	0.33	0.39	0.4	0.43	0.45	0.39	0.4	Mamdc2	19	23302609	23448322	protein_coding	KNOWN
ENSMUSG00000033053	0.52	0.48	0.51	0.53	0.46	0.48	0.51	0.52	0.51	0.55	0.5	0.514	1700028P14Rik	19	23558760	23652812	protein_coding	KNOWN
ENSMUSG00000024897	0.46	0.46	0.46	0.49	0.47	0.47	0.47	0.46	0.47	0.47	0.468	0.468	Apba1	19	23758876	23949597	protein_coding	KNOWN
ENSMUSG00000071604	0.41	0.47	0.47	0.46	0.46	0.47	0.46	0.49	0.48	0.46	0.454	0.472	Fam189a2	19	23972751	24031019	protein_coding	KNOWN
ENSMUSG00000024812	0.46	0.49	0.49	0.43	0.52	0.48	0.47	0.46	0.47	0.48	0.478	0.472	Tjp2	19	24094523	24225026	protein_coding	KNOWN
ENSMUSG00000059363	0.58	0.54	0.45	0.47	0.38	0.53	0.58	0.55	0.58	0.54	0.484	0.556	Fxn	19	24261453	24280605	protein_coding	KNOWN
ENSMUSG00000041731	0.55	0.48	0.58	0.54	0.48	0.58	0.5	0.42	0.45	0.37	0.526	0.464	Pgm5	19	24683016	24861855	protein_coding	KNOWN
ENSMUSG00000024878	0.49	0.38	0.43	0.46	0.44	0.43	0.46	0.43	0.46	0.45	0.44	0.446	Cbwd1	19	24919916	24961616	protein_coding	KNOWN
ENSMUSG00000052085	0.57	0.6	0.61	0.56	0.6	0.58	0.59	0.61	0.6	0.59	0.588	0.594	Dock8	19	24999529	25202432	protein_coding	KNOWN
ENSMUSG00000032702	0.46	0.49	0.48	0.46	0.45	0.45	0.47	0.5	0.48	0.42	0.468	0.464	Kank1	19	25236975	25434496	protein_coding	KNOWN
ENSMUSG00000042372	0.55	0.51	0.51	0.54	0.56	0.56	0.53	0.52	0.52	0.54	0.534	0.534	Dmrt3	19	25610537	25623920	protein_coding	KNOWN
ENSMUSG00000048138	0.41	0.44	0.4	0.42	0.45	0.5	0.41	0.46	0.4	0.42	0.424	0.438	Dmrt2	19	25672420	25679010	protein_coding	KNOWN
ENSMUSG00000024921	0.47	0.44	0.45	0.48	0.47	0.45	0.42	0.45	0.44	0.47	0.462	0.446	Smarca2	19	26605115	26778321	protein_coding	KNOWN
ENSMUSG00000024924	0.39	0.37	0.38	0.4	0.41	0.44	0.39	0.37	0.4	0.41	0.39	0.402	Vldlr	19	27216484	27254231	protein_coding	KNOWN
ENSMUSG00000041360	0.52	0.49	0.51	0.46	0.52	0.47	0.51	0.5	0.47	0.47	0.5	0.484	D19Bwg1357e	19	27388702	27429820	protein_coding	KNOWN
ENSMUSG00000040929	0.5	0.48	0.49	0.5	0.5	0.49	0.51	0.48	0.48	0.5	0.494	0.492	Rfx3	19	27761721	28011166	protein_coding	KNOWN
ENSMUSG00000052942	0.5	0.51	0.54	0.47	0.43	0.51	0.51	0.52	0.5	0.53	0.49	0.514	Glis3	19	28258851	28680077	protein_coding	KNOWN
ENSMUSG00000040105	0.47	0.43	0.46	0.52	0.47	0.47	0.48	0.43	0.44	0.42	0.47	0.448	Ppapdc2	19	28963920	28966798	protein_coding	KNOWN
ENSMUSG00000024780	0.48	0.56	0.59	0.46	0.48	0.57	0.53	0.49	0.49	0.51	0.514	0.518	Cdc37l1	19	28990494	29017569	protein_coding	KNOWN
ENSMUSG00000024782	0.57	0.58	0.59	0.57	0.59	0.57	0.6	0.57	0.56	0.58	0.58	0.576	Ak3	19	29020833	29047961	protein_coding	KNOWN
ENSMUSG00000024785	0.53	0.58	0.56	0.46	0.52	0.46	0.55	0.5	0.54	0.51	0.53	0.512	Rcl1	19	29101375	29143843	protein_coding	KNOWN
ENSMUSG00000050957	0.71	0.7	0.79	0.7	0.61	0.73	0.7	0.69	0.73	0.63	0.702	0.696	Insl6	19	29321347	29325356	protein_coding	KNOWN
ENSMUSG00000016495	0.61	0.52	0.54	0.58	0.55	0.56	0.54	0.53	0.5	0.54	0.56	0.534	5033414D02Rik	19	29348599	29367390	protein_coding	KNOWN
ENSMUSG00000016496	0.71	0.7	0.7	0.68	0.78	0.73	0.71	0.72	0.78	0.73	0.714	0.734	Cd274	19	29367455	29388095	protein_coding	KNOWN
ENSMUSG00000038658	0.56	0.48	0.52	0.58	0.51	0.54	0.5	0.52	0.48	0.48	0.53	0.504	C030046E11Rik	19	29522282	29606829	protein_coding	KNOWN
ENSMUSG00000046324	0.53	0.44	0.49	0.48	0.49	0.48	0.46	0.44	0.47	0.47	0.486	0.464	Ermp1	19	29608214	29648415	protein_coding	KNOWN
ENSMUSG00000074909	0.53	0.53	0.49	0.52	0.5	0.47	0.48	0.5	0.51	0.54	0.514	0.5	Ranbp6	19	29808108	29812974	protein_coding	KNOWN
ENSMUSG00000024817	0.47	0.47	0.51	0.48	0.48	0.48	0.5	0.46	0.47	0.53	0.482	0.488	Uhrf2	19	30030513	30093722	protein_coding	KNOWN
ENSMUSG00000024827	0.85	0.8	0.85	0.86	0.88	0.89	0.89	0.92	0.88	0.9	0.848	0.896	Gldc	19	30098449	30175418	protein_coding	KNOWN
ENSMUSG00000024863	0.92	0.98	1	1	1	0.96	0.83	0.98	0.96	0.98	0.98	0.942	Mbl2	19	30232928	30239685	protein_coding	KNOWN
ENSMUSG00000024868	0.54	0.5	0.45	0.67	0.61	0.65	0.62	0.65	0.53	0.44	0.554	0.578	Dkk1	19	30545863	30549665	protein_coding	KNOWN
ENSMUSG00000053536	0.5	0.51	0.5	0.48	0.54	0.54	0.55	0.52	0.46	0.51	0.506	0.516	Cstf2t	19	31082841	31086590	protein_coding	KNOWN
ENSMUSG00000024896	0.52	0.49	0.53	0.49	0.51	0.5	0.51	0.51	0.44	0.45	0.508	0.482	Minpp1	19	32485769	32515370	protein_coding	KNOWN
ENSMUSG00000024899	0.48	0.47	0.49	0.48	0.49	0.46	0.47	0.47	0.46	0.46	0.482	0.464	Papss2	19	32620005	32667187	protein_coding	KNOWN
ENSMUSG00000013662	0.51	0.47	0.5	0.48	0.5	0.48	0.51	0.49	0.47	0.49	0.492	0.488	Atad1	19	32672563	32712298	protein_coding	KNOWN
ENSMUSG00000013663	0.51	0.53	0.5	0.47	0.5	0.5	0.49	0.5	0.51	0.47	0.502	0.494	Pten	19	32757497	32826160	protein_coding	KNOWN
ENSMUSG00000071573	0.3	0.36	0.36	0.36	0.41	0.41	0.58	0.44	0.43	0.4	0.358	0.452	Rnls	19	33137747	33392295	protein_coding	NOVEL
ENSMUSG00000056078	0.26	0.2	0.26	0.28	0.11	0.17	0.2	0.13	0.06	0.22	0.222	0.156	Lipm	19	34100943	34122687	protein_coding	KNOWN
ENSMUSG00000024774	0.43	0.34	0.41	0.48	0.46	0.47	0.39	0.44	0.4	0.46	0.424	0.432	Ankrd22	19	34122549	34166053	protein_coding	KNOWN
ENSMUSG00000024776	0.42	0.5	0.39	0.35	0.43	0.4	0.39	0.42	0.48	0.47	0.418	0.432	Stambpl1	19	34192229	34240333	protein_coding	KNOWN
ENSMUSG00000035783	0.51	0.49	0.5	0.51	0.5	0.5	0.51	0.52	0.51	0.51	0.502	0.51	Acta2	19	34241090	34255336	protein_coding	KNOWN
ENSMUSG00000024778	0.55	0.67	0.55	0.52	0.58	0.63	0.58	0.45	0.39	0.58	0.574	0.526	Fas	19	34290659	34327770	protein_coding	KNOWN
ENSMUSG00000050370	0.6	0.36	0.62	0.75	0.82	0.4	1	0.76	0.43	0.65	0.63	0.648	Ch25h	19	34473786	34475135	protein_coding	KNOWN
ENSMUSG00000024781	0.33	0.38	0.33	0.39	0.38	0.36	0.39	0.39	0.36	0.38	0.362	0.376	Lipa	19	34492318	34527474	protein_coding	KNOWN
ENSMUSG00000045932	0.9	0.87	0.91	0.9	0.9	0.93	0.89	0.92	0.9	0.91	0.896	0.91	Ifit2	19	34550694	34576419	protein_coding	KNOWN
ENSMUSG00000074896	0.62	0.74	0.67	0.83	0.75	0.67	0.85	0.78	0.73	0.61	0.722	0.728	Ifit3	19	34583531	34588731	protein_coding	KNOWN
ENSMUSG00000062488	0.57	0.71	0.61	0.64	0.53	0.51	0.65	0.64	0.6	0.81	0.612	0.642	I830012O16Rik	19	34607970	34613401	protein_coding	NOVEL
ENSMUSG00000034459	0.88	0.93	0.9	0.93	0.89	0.94	0.92	0.93	0.92	0.93	0.906	0.928	Ifit1	19	34640871	34650009	protein_coding	KNOWN
ENSMUSG00000009378	0.48	0.61	0.42	0.34	0.49	0.36	0.41	0.53	0.52	0.39	0.468	0.442	Slc16a12	19	34668403	34747289	protein_coding	KNOWN
ENSMUSG00000033610	0.55	0.49	0.49	0.5	0.53	0.5	0.45	0.52	0.49	0.51	0.512	0.494	Pank1	19	34810894	34879455	protein_coding	KNOWN
ENSMUSG00000024795	0.33	0.46	0.43	0.56	0.48	0.45	0.5	0.49	0.43	0.38	0.452	0.45	Kif20b	19	34922358	34975731	protein_coding	KNOWN
ENSMUSG00000024800	0.52	0.52	0.55	0.43	0.55	0.47	0.49	0.51	0.52	0.47	0.514	0.492	Rpp30	19	36083716	36104772	protein_coding	KNOWN
ENSMUSG00000087579	0.51	0.52	0.51	0.49	0.58	0.6	0.58	0.52	0.52	0.5	0.522	0.544	1500017E21Rik	19	36614052	36705641	lincRNA	KNOWN
ENSMUSG00000067279	0.44	0.32	0.39	0.47	0.47	0.34	0.45	0.3	0.38	0.29	0.418	0.352	Ppp1r3c	19	36731737	36736653	protein_coding	KNOWN
ENSMUSG00000024811	0.52	0.51	0.51	0.51	0.5	0.52	0.51	0.51	0.52	0.5	0.51	0.512	Tnks2	19	36834232	36893477	protein_coding	KNOWN
ENSMUSG00000047632	0.49	0.51	0.54	0.61	0.56	0.76	0.51	0.69	0.77	0.49	0.542	0.644	Fgfbp3	19	36917550	36919615	protein_coding	KNOWN
ENSMUSG00000040565	0.46	0.49	0.45	0.43	0.43	0.51	0.45	0.48	0.47	0.47	0.452	0.476	Btaf1	19	36926079	37012752	protein_coding	KNOWN
ENSMUSG00000056999	0.52	0.55	0.56	0.5	0.54	0.7	0.53	0.68	0.68	0.54	0.534	0.626	Ide	19	37268743	37337852	protein_coding	KNOWN
ENSMUSG00000012443	0.57	0.56	0.66	0.69	0.46	0.53	0.47	0.57	0.6	0.56	0.588	0.546	Kif11	19	37376403	37421859	protein_coding	KNOWN
ENSMUSG00000024986	0.53	0.24	0.53	0.6	0.45	0.73	0.53	0.65	0.67	0.55	0.47	0.626	Hhex	19	37432887	37440728	protein_coding	KNOWN
ENSMUSG00000053799	0.47	0.48	0.49	0.59	0.44	0.53	0.45	0.49	0.51	0.49	0.494	0.494	Exoc6	19	37550418	37683245	protein_coding	KNOWN
ENSMUSG00000054237	0.49	0.53	0.48	0.48	0.46	0.51	0.5	0.49	0.49	0.48	0.488	0.494	5730455O13Rik	19	38188481	38224138	protein_coding	KNOWN
ENSMUSG00000067242	0.37	0.49	0.53	0.53	0.32	0.56	0.42	0.4	0.43	0.45	0.448	0.452	Lgi1	19	38264782	38308939	protein_coding	KNOWN
ENSMUSG00000044026	0.37	0.49	0.5	0.41	0.48	0.47	0.46	0.48	0.47	0.46	0.45	0.468	Tmem20	19	38395980	38405607	protein_coding	KNOWN
ENSMUSG00000024998	0.47	0.49	0.52	0.48	0.48	0.52	0.53	0.5	0.48	0.53	0.488	0.512	Plce1	19	38524197	38785098	protein_coding	KNOWN
ENSMUSG00000024999	0.57	0.59	0.51	0.64	0.58	0.55	0.6	0.54	0.55	0.59	0.578	0.566	Noc3l	19	38788128	38819237	protein_coding	KNOWN
ENSMUSG00000048720	0.51	0.51	0.48	0.44	0.49	0.48	0.48	0.49	0.47	0.49	0.486	0.482	Tbc1d12	19	38836579	38919923	protein_coding	KNOWN
ENSMUSG00000025001	0.52	0.63	0.58	0.54	0.57	0.66	0.72	0.5	0.62	0.56	0.568	0.612	Hells	19	38930915	38971051	protein_coding	KNOWN
ENSMUSG00000055044	0.71	0.79	0.75	0.71	0.72	0.78	0.76	0.78	0.8	0.76	0.736	0.776	Pdlim1	19	40222241	40271616	protein_coding	KNOWN
ENSMUSG00000025006	0.56	0.47	0.51	0.47	0.63	0.53	0.51	0.49	0.51	0.49	0.528	0.506	Sorbs1	19	40295049	40402267	protein_coding	KNOWN
ENSMUSG00000025008	0.55	0.62	0.6	0.56	0.63	0.59	0.59	0.57	0.55	0.55	0.592	0.57	Tctn3	19	40596446	40612233	protein_coding	KNOWN
ENSMUSG00000048120	0.51	0.54	0.5	0.53	0.52	0.56	0.52	0.56	0.55	0.55	0.52	0.548	Entpd1	19	40612366	40741602	protein_coding	KNOWN
ENSMUSG00000049164	0.51	0.51	0.58	0.47	0.53	0.56	0.46	0.54	0.5	0.53	0.52	0.518	Zfp518a	19	40894705	40917947	protein_coding	KNOWN
ENSMUSG00000061132	0.54	0.51	0.47	0.52	0.54	0.49	0.47	0.48	0.5	0.51	0.516	0.49	Blnk	19	40928927	40994535	protein_coding	KNOWN
ENSMUSG00000025016	0.51	0.5	0.52	0.51	0.52	0.52	0.51	0.5	0.51	0.52	0.512	0.512	Tm9sf3	19	41210842	41264004	protein_coding	KNOWN
ENSMUSG00000025017	0.47	0.55	0.48	0.53	0.53	0.62	0.48	0.61	0.52	0.63	0.512	0.572	Pik3ap1	19	41274218	41385070	protein_coding	KNOWN
ENSMUSG00000025019	0.51	0.5	0.51	0.54	0.47	0.44	0.55	0.52	0.55	0.45	0.506	0.502	Lcor	19	41482645	41562246	protein_coding	KNOWN
ENSMUSG00000090673	0.6	0.5	0.42	0.4	0.5	0.5	0.42	0.48	0.49	0.61	0.484	0.5	Gm340	19	41582370	41586536	protein_coding	KNOWN
ENSMUSG00000074873	0.48	0.52	0.47	0.43	0.5	0.49	0.57	0.54	0.52	0.5	0.48	0.524	AI606181	19	41593363	41596158	protein_coding	PUTATIVE
ENSMUSG00000025020	0.54	0.51	0.49	0.49	0.52	0.54	0.55	0.57	0.52	0.52	0.51	0.54	Slit1	19	41600257	41743665	protein_coding	KNOWN
ENSMUSG00000047604	0.45	0.53	0.46	0.53	0.34	0.42	0.44	0.45	0.51	0.47	0.462	0.458	Frat2	19	41845978	41848132	protein_coding	KNOWN
ENSMUSG00000035049	0.55	0.57	0.54	0.49	0.57	0.56	0.55	0.55	0.51	0.6	0.544	0.554	Rrp12	19	41862852	41896153	protein_coding	KNOWN
ENSMUSG00000011752	0.45	0.48	0.44	0.45	0.46	0.47	0.47	0.45	0.45	0.44	0.456	0.456	Pgam1	19	41911871	41918664	protein_coding	KNOWN
ENSMUSG00000025157	0.63	0.44	0.56	0.33	0.45	0.58	0.45	0.53	0.49	0.52	0.482	0.514	Zdhhc16	19	41933472	41944095	protein_coding	KNOWN
ENSMUSG00000025159	0.55	0.55	0.53	0.55	0.52	0.52	0.52	0.52	0.49	0.5	0.54	0.51	Mms19	19	41941086	41981157	protein_coding	KNOWN
ENSMUSG00000025171	0.5	0.47	0.52	0.49	0.51	0.51	0.49	0.53	0.54	0.53	0.498	0.52	Ubtd1	19	41981763	42034641	protein_coding	KNOWN
ENSMUSG00000025176	0.33	0.22	0.22	0.16	0.22	0.26	0.36	0.33	0.31	0.32	0.23	0.316	Hoga1	19	42045610	42070953	protein_coding	KNOWN
ENSMUSG00000049670	0.56	0.53	0.52	0.55	0.46	0.49	0.48	0.47	0.49	0.46	0.524	0.478	Morn4	19	42074939	42086370	protein_coding	KNOWN
ENSMUSG00000025178	0.52	0.51	0.53	0.52	0.52	0.53	0.53	0.51	0.52	0.54	0.52	0.526	Pi4k2a	19	42090435	42122218	protein_coding	KNOWN
ENSMUSG00000018821	0.58	0.5	0.54	0.61	0.52	0.58	0.53	0.54	0.59	0.55	0.55	0.558	Avpi1	19	42123273	42129059	protein_coding	KNOWN
ENSMUSG00000044345	0.58	0.55	0.54	0.53	0.56	0.51	0.56	0.54	0.57	0.56	0.552	0.548	Marveld1	19	42147400	42151695	protein_coding	KNOWN
ENSMUSG00000018820	0.49	0.51	0.48	0.52	0.44	0.47	0.45	0.46	0.48	0.5	0.488	0.472	Zfyve27	19	42163951	42194590	protein_coding	KNOWN
ENSMUSG00000018822	0.67	0.59	0.66	0.56	0.62	0.63	0.61	0.66	0.61	0.64	0.62	0.63	Sfrp5	19	42197971	42202252	protein_coding	KNOWN
ENSMUSG00000042532	0.6	0.6	0.61	0.61	0.61	0.63	0.59	0.59	0.57	0.6	0.606	0.596	Golga7b	19	42247574	42270348	protein_coding	KNOWN
ENSMUSG00000042401	0.45	0.27	0.53	0.19	0.43	0.67	0.32	0.36	0.3	0.38	0.374	0.406	Crtac1	19	42283037	42431783	protein_coding	KNOWN
ENSMUSG00000025184	0.49	0.52	0.44	0.49	0.46	0.46	0.51	0.48	0.47	0.46	0.48	0.476	D19Ertd386e	19	42518759	42592343	protein_coding	KNOWN
ENSMUSG00000025185	0.54	0.36	0.55	0.52	0.36	0.47	0.38	0.45	0.49	0.4	0.466	0.438	Loxl4	19	42593982	42612813	protein_coding	KNOWN
ENSMUSG00000060224	0.29	0.4	0.41	0.23	0.34	0.19	0.25	0.27	0.22	0.27	0.334	0.24	Pyroxd2	19	42725858	42752775	protein_coding	KNOWN
ENSMUSG00000025188	0.46	0.48	0.44	0.52	0.49	0.52	0.48	0.48	0.56	0.48	0.478	0.504	Hps1	19	42755105	42779978	protein_coding	KNOWN
ENSMUSG00000025189	0.62	0.46	0.45	0.37	0.42	0.44	0.48	0.53	0.49	0.5	0.464	0.488	Cnnm1	19	43440436	43497212	protein_coding	KNOWN
ENSMUSG00000025190	0.42	0.42	0.46	0.44	0.43	0.46	0.42	0.45	0.44	0.42	0.434	0.438	Got1	19	43499752	43524605	protein_coding	KNOWN
ENSMUSG00000040414	0.47	0.49	0.51	0.54	0.45	0.48	0.53	0.5	0.51	0.47	0.492	0.498	Slc25a28	19	43663822	43674881	protein_coding	KNOWN
ENSMUSG00000025192	0.58	0.63	0.44	0.67	0.63	0.5	0.39	0.48	0.45	0.4	0.59	0.444	Entpd7	19	43689672	43733697	protein_coding	KNOWN
ENSMUSG00000040018	0.48	0.49	0.49	0.5	0.54	0.49	0.55	0.52	0.5	0.5	0.5	0.512	Cox15	19	43733254	43753000	protein_coding	KNOWN
ENSMUSG00000025195	0.51	0.48	0.46	0.38	0.39	0.49	0.49	0.46	0.49	0.52	0.444	0.49	Dnmbp	19	43847967	43912392	protein_coding	KNOWN
ENSMUSG00000025196	0.35	0.39	0.44	0.32	0.4	0.38	0.38	0.41	0.34	0.38	0.38	0.378	Cpn1	19	43956307	43986556	protein_coding	KNOWN
ENSMUSG00000025197	0.36	0.42	0.58	0.55	0.57	0.48	0.61	0.52	0.66	0.62	0.496	0.578	Cyp2c44	19	44005022	44029247	protein_coding	KNOWN
ENSMUSG00000025198	0.56	0.52	0.57	0.51	0.52	0.53	0.51	0.52	0.51	0.53	0.536	0.52	Erlin1	19	44034944	44069785	protein_coding	KNOWN
ENSMUSG00000025199	0.54	0.51	0.53	0.49	0.52	0.52	0.54	0.52	0.55	0.52	0.518	0.53	Chuk	19	44073335	44107480	protein_coding	KNOWN
ENSMUSG00000025200	0.58	0.51	0.52	0.51	0.44	0.49	0.45	0.53	0.55	0.57	0.512	0.518	Cwf19l1	19	44108644	44135876	protein_coding	KNOWN
ENSMUSG00000057506	0.59	0.91	0.46	0.5	0.22	0.47	0.63	0.49	0.43	0.53	0.536	0.51	Bloc1s2	19	44139266	44146446	protein_coding	KNOWN
ENSMUSG00000025202	0.79	0.62	0.71	0.53	0.54	0.6	0.79	0.94	0.23	0.65	0.638	0.642	Scd3	19	44203288	44244016	protein_coding	KNOWN
ENSMUSG00000025203	0.55	0.55	0.54	0.55	0.56	0.55	0.53	0.54	0.54	0.54	0.55	0.54	Scd2	19	44293676	44306864	protein_coding	KNOWN
ENSMUSG00000037071	0.48	0.49	0.5	0.51	0.48	0.49	0.49	0.48	0.48	0.49	0.492	0.486	Scd1	19	44394451	44407709	protein_coding	KNOWN
ENSMUSG00000025204	0.47	0.47	0.5	0.5	0.51	0.5	0.49	0.49	0.49	0.48	0.49	0.49	Ndufb8	19	44548572	44555440	protein_coding	KNOWN
ENSMUSG00000036450	0.5	0.53	0.56	0.49	0.52	0.54	0.54	0.53	0.52	0.53	0.52	0.532	Hif1an	19	44562850	44576274	protein_coding	KNOWN
ENSMUSG00000036097	0.56	0.52	0.53	0.59	0.54	0.53	0.54	0.55	0.52	0.57	0.548	0.542	Fam178a	19	44931119	44983787	protein_coding	KNOWN
ENSMUSG00000025207	0.46	0.47	0.43	0.43	0.44	0.47	0.48	0.46	0.47	0.47	0.446	0.47	Sema4g	19	44989101	45003397	protein_coding	KNOWN
ENSMUSG00000025208	0.66	0.61	0.63	0.6	0.64	0.61	0.64	0.61	0.65	0.62	0.628	0.626	Mrpl43	19	45005014	45006442	protein_coding	KNOWN
ENSMUSG00000025209	0.49	0.47	0.43	0.48	0.56	0.53	0.48	0.5	0.5	0.52	0.486	0.506	Peo1	19	45006558	45012762	protein_coding	KNOWN
ENSMUSG00000035342	0.54	0.53	0.51	0.5	0.52	0.5	0.55	0.52	0.49	0.5	0.52	0.512	Lzts2	19	45015176	45027104	protein_coding	KNOWN
ENSMUSG00000025218	0.51	0.44	0.49	0.54	0.45	0.53	0.52	0.48	0.47	0.49	0.486	0.498	Poll	19	45552275	45560531	protein_coding	KNOWN
ENSMUSG00000041035	0.5	0.5	0.45	0.47	0.49	0.47	0.43	0.45	0.45	0.45	0.482	0.45	Dpcd	19	45560615	45578279	protein_coding	KNOWN
ENSMUSG00000040913	0.4	0.42	0.48	0.55	0.51	0.49	0.56	0.5	0.52	0.53	0.472	0.52	Fbxw4	19	45578254	45660312	protein_coding	KNOWN
ENSMUSG00000056209	0.45	0.47	0.47	0.44	0.48	0.48	0.47	0.48	0.43	0.46	0.462	0.464	Npm3	19	45747734	45749591	protein_coding	KNOWN
ENSMUSG00000025220	0.51	0.51	0.54	0.52	0.52	0.51	0.53	0.52	0.52	0.52	0.52	0.52	Mgea5	19	45750261	45783520	protein_coding	KNOWN
ENSMUSG00000039901	0.44	0.47	0.4	0.45	0.4	0.47	0.46	0.45	0.45	0.49	0.432	0.464	9130011E15Rik	19	45818144	45998488	protein_coding	KNOWN
ENSMUSG00000074811	0.49	0.57	0.54	0.49	0.49	0.58	0.55	0.55	0.54	0.52	0.516	0.548	Hps6	19	46003478	46006173	protein_coding	KNOWN
ENSMUSG00000025223	0.77	0.77	0.69	0.74	0.75	0.74	0.72	0.73	0.74	0.71	0.744	0.728	Ldb1	19	46032593	46045214	protein_coding	KNOWN
ENSMUSG00000055491	0.49	0.51	0.53	0.54	0.58	0.58	0.57	0.53	0.52	0.5	0.53	0.54	Pprc1	19	46044886	46072915	protein_coding	KNOWN
ENSMUSG00000015176	0.5	0.48	0.46	0.52	0.5	0.52	0.47	0.49	0.49	0.49	0.492	0.492	Nolc1	19	46075863	46085528	protein_coding	KNOWN
ENSMUSG00000025224	0.53	0.53	0.54	0.49	0.51	0.53	0.53	0.53	0.52	0.52	0.52	0.526	Gbf1	19	46152509	46286510	protein_coding	KNOWN
ENSMUSG00000037126	0.49	0.51	0.49	0.55	0.47	0.48	0.49	0.53	0.47	0.49	0.502	0.492	Psd	19	46312087	46327156	protein_coding	KNOWN
ENSMUSG00000036748	0.46	0.52	0.53	0.46	0.49	0.48	0.49	0.5	0.45	0.46	0.492	0.476	Cuedc2	19	46329812	46338660	protein_coding	KNOWN
ENSMUSG00000025227	0.56	0.45	0.4	0.5	0.49	0.48	0.47	0.51	0.46	0.44	0.48	0.472	Tmem180	19	46341121	46375252	protein_coding	KNOWN
ENSMUSG00000025228	0.52	0.5	0.48	0.53	0.52	0.51	0.51	0.5	0.51	0.5	0.51	0.506	Actr1a	19	46376814	46395735	protein_coding	KNOWN
ENSMUSG00000025231	0.45	0.51	0.47	0.46	0.5	0.5	0.47	0.54	0.48	0.51	0.478	0.5	Sufu	19	46396896	46488804	protein_coding	KNOWN
ENSMUSG00000025034	0.48	0.51	0.5	0.53	0.5	0.52	0.48	0.49	0.51	0.47	0.504	0.494	Trim8	19	46501648	46516444	protein_coding	KNOWN
ENSMUSG00000025035	0.56	0.53	0.58	0.54	0.54	0.52	0.52	0.54	0.52	0.57	0.55	0.534	Arl3	19	46531109	46573085	protein_coding	KNOWN
ENSMUSG00000025036	0.5	0.5	0.44	0.44	0.45	0.46	0.42	0.49	0.47	0.42	0.466	0.452	Sfxn2	19	46573365	46596898	protein_coding	KNOWN
ENSMUSG00000062376	0.45	0.47	0.49	0.47	0.47	0.48	0.52	0.52	0.5	0.5	0.47	0.504	2010012O05Rik	19	46689906	46703382	protein_coding	KNOWN
ENSMUSG00000003559	0.24	0.21	0.25	0.24	0.2	0.23	0.22	0.26	0.25	0.26	0.228	0.244	As3mt	19	46707443	46741095	protein_coding	KNOWN
ENSMUSG00000034336	0.39	0.38	0.38	0.33	0.42	0.39	0.38	0.37	0.37	0.39	0.38	0.38	Ina	19	47014698	47025327	protein_coding	KNOWN
ENSMUSG00000025050	0.45	0.5	0.48	0.47	0.48	0.48	0.46	0.44	0.47	0.46	0.476	0.462	Pcgf6	19	47033619	47050845	protein_coding	KNOWN
ENSMUSG00000025049	0.57	0.5	0.55	0.45	0.37	0.45	0.32	0.58	0.58	0.56	0.488	0.498	Taf5	19	47067748	47083479	protein_coding	KNOWN
ENSMUSG00000071528	0.52	0.44	0.47	0.46	0.49	0.49	0.48	0.5	0.5	0.49	0.476	0.492	Usmg5	19	47083471	47090625	protein_coding	KNOWN
ENSMUSG00000025047	0.5	0.52	0.38	0.44	0.45	0.52	0.5	0.48	0.5	0.48	0.458	0.496	Pdcd11	19	47090766	47131143	protein_coding	KNOWN
ENSMUSG00000033033	0.38	0.55	0.47	0.71	0.53	0.67	0.43	0.59	0.52	0.44	0.528	0.53	Calhm2	19	47105353	47138294	protein_coding	KNOWN
ENSMUSG00000006435	0.5	0.47	0.51	0.46	0.47	0.44	0.47	0.46	0.47	0.48	0.482	0.464	Neurl1a	19	47178820	47259440	protein_coding	KNOWN
ENSMUSG00000053617	0.46	0.46	0.46	0.44	0.46	0.47	0.49	0.46	0.48	0.47	0.456	0.474	Sh3pxd2a	19	47260174	47464411	protein_coding	KNOWN
ENSMUSG00000042694	0.29	0.4	0.41	0.32	0.34	0.29	0.41	0.36	0.42	0.36	0.352	0.368	Obfc1	19	47501048	47537020	protein_coding	KNOWN
ENSMUSG00000025060	0.44	0.44	0.44	0.42	0.45	0.45	0.44	0.43	0.44	0.42	0.438	0.436	Slk	19	47579678	47645246	protein_coding	KNOWN
ENSMUSG00000025066	0.55	0.55	0.53	0.51	0.53	0.52	0.53	0.52	0.55	0.52	0.534	0.528	Sfr1	19	47731756	47735588	protein_coding	KNOWN
ENSMUSG00000044948	0.4	0.37	0.38	0.4	0.43	0.39	0.43	0.34	0.39	0.34	0.396	0.378	Wdr96	19	47737561	47919287	protein_coding	KNOWN
ENSMUSG00000025068	0.68	0.62	0.58	0.58	0.61	0.63	0.6	0.6	0.6	0.64	0.614	0.614	Gsto1	19	47854970	47864790	protein_coding	KNOWN
ENSMUSG00000025069	0.65	0.24	0.49	0.28	0.34	0.3	0.49	0.29	0.22	0.33	0.4	0.326	Gsto2	19	47865545	47886324	protein_coding	KNOWN
ENSMUSG00000079254	0.57	0.57	0.6	0.63	0.47	0.55	0.51	0.55	0.53	0.53	0.568	0.534	Itprip	19	47894598	47919299	protein_coding	KNOWN
ENSMUSG00000046585	0.54	0.5	0.5	0.5	0.5	0.54	0.57	0.54	0.52	0.57	0.508	0.548	Ccdc147	19	47937712	48035379	protein_coding	KNOWN
ENSMUSG00000063434	0.11	0.48	0.59	0.38	0	0	0.49	0.48	0.52	0.56	0.312	0.41	Sorcs3	19	48206025	48805505	protein_coding	KNOWN
ENSMUSG00000043531	0.45	0.49	0.36	0.6	0.52	0.39	0.47	0.5	0.51	0.55	0.484	0.484	Sorcs1	19	50143301	50678646	protein_coding	KNOWN
ENSMUSG00000025027	0.4	0.42	0.41	0.41	0.4	0.41	0.44	0.42	0.42	0.39	0.408	0.416	Xpnpep1	19	52991183	53038633	protein_coding	KNOWN
ENSMUSG00000025025	0.51	0.5	0.47	0.43	0.51	0.47	0.47	0.47	0.49	0.41	0.484	0.462	Mxi1	19	53310506	53375810	protein_coding	KNOWN
ENSMUSG00000025024	0.51	0.49	0.44	0.51	0.53	0.53	0.48	0.49	0.51	0.47	0.496	0.496	Smndc1	19	53379214	53390573	protein_coding	KNOWN
ENSMUSG00000034765	0.62	0.48	0.53	0.59	0.66	0.54	0.46	0.53	0.49	0.54	0.576	0.512	Dusp5	19	53529109	53542431	protein_coding	KNOWN
ENSMUSG00000024974	0.48	0.5	0.53	0.54	0.58	0.52	0.54	0.49	0.55	0.52	0.526	0.524	Smc3	19	53600398	53645833	protein_coding	KNOWN
ENSMUSG00000089679	0.71	0.62	0.63	1	1	0.44	0.13	0.18	0.28	0.39	0.792	0.284	Gm16299	19	53819354	53825128	antisense	PUTATIVE
ENSMUSG00000084957	0.5	0.52	0.52	0.52	0.51	0.5	0.5	0.55	0.53	0.52	0.514	0.52	Bbip1	19	53929677	53944627	protein_coding	KNOWN
ENSMUSG00000024976	0.47	0.49	0.48	0.45	0.48	0.5	0.48	0.47	0.48	0.47	0.474	0.48	Shoc2	19	53944306	54033268	protein_coding	KNOWN
ENSMUSG00000033717	0.47	0.54	0.45	0.46	0.39	0.45	0.47	0.45	0.45	0.46	0.462	0.456	Adra2a	19	54045182	54048982	protein_coding	KNOWN
ENSMUSG00000024978	0.37	0.41	0.42	0.38	0.34	0.43	0.44	0.39	0.42	0.44	0.384	0.424	Gpam	19	55069734	55099451	protein_coding	KNOWN
ENSMUSG00000024981	0.54	0.53	0.51	0.48	0.51	0.52	0.52	0.5	0.53	0.49	0.514	0.512	Acsl5	19	55253369	55296627	protein_coding	KNOWN
ENSMUSG00000024982	0.52	0.55	0.54	0.61	0.55	0.58	0.58	0.58	0.53	0.49	0.554	0.552	Zdhhc6	19	55298301	55316032	protein_coding	KNOWN
ENSMUSG00000024983	0.46	0.46	0.47	0.49	0.51	0.47	0.46	0.45	0.43	0.41	0.478	0.444	Vti1a	19	55316351	55626561	protein_coding	KNOWN
ENSMUSG00000025076	0.56	0.6	0.57	0.57	0.49	0.59	0.56	0.54	0.55	0.48	0.558	0.544	Casp7	19	56397129	56442344	protein_coding	KNOWN
ENSMUSG00000035818	0.65	0.47	0.45	0.57	0.47	0.4	0.41	0.41	0.35	0.45	0.522	0.404	9930023K05Rik	19	56461637	56486729	protein_coding	KNOWN
ENSMUSG00000025077	0.37	0.46	0.49	0.39	0.34	0.43	0.43	0.47	0.44	0.52	0.41	0.458	Dclre1a	19	56529161	56548222	protein_coding	KNOWN
ENSMUSG00000025078	0.48	0.5	0.53	0.5	0.53	0.51	0.47	0.51	0.49	0.48	0.508	0.492	Nhlrc2	19	56548261	56598846	protein_coding	KNOWN
ENSMUSG00000035283	0.41	0.37	0.47	0.42	0.49	0.38	0.51	0.55	0.46	0.36	0.432	0.452	Adrb1	19	56722372	56724862	protein_coding	KNOWN
ENSMUSG00000035173	0.52	0.5	0.49	0.54	0.49	0.49	0.49	0.48	0.49	0.49	0.508	0.488	A630007B06Rik	19	56787481	56822190	protein_coding	KNOWN
ENSMUSG00000025082	0.36	0.23	0.29	0.36	0.35	0.41	0.31	0.4	0.28	0.27	0.318	0.334	Vwa2	19	56874249	56912078	protein_coding	KNOWN
ENSMUSG00000025085	0.44	0.45	0.46	0.42	0.47	0.49	0.47	0.46	0.46	0.5	0.448	0.476	Ablim1	19	57032733	57314919	protein_coding	KNOWN
ENSMUSG00000033478	0.45	0.52	0.57	0.57	0.52	0.51	0.52	0.52	0.51	0.53	0.526	0.518	Fam160b1	19	57361009	57389594	protein_coding	KNOWN
ENSMUSG00000025086	0.48	0.5	0.54	0.43	0.61	0.53	0.53	0.53	0.45	0.59	0.512	0.526	Trub1	19	57452906	57491005	protein_coding	KNOWN
ENSMUSG00000054843	0.49	0.51	0.46	0.48	0.47	0.49	0.43	0.47	0.48	0.5	0.482	0.474	Atrnl1	19	57611034	58133338	protein_coding	KNOWN
ENSMUSG00000025092	0.45	0.41	0.47	0.53	0.55	0.49	0.45	0.5	0.51	0.47	0.482	0.484	Hspa12a	19	58795751	58860984	protein_coding	KNOWN
ENSMUSG00000087095	0.71	0.72	0.69	0.63	0.81	0.7	0.67	0.72	0.63	0.75	0.712	0.694	Emx2os	19	59425104	59458635	antisense	NOVEL
ENSMUSG00000043969	0.7	0.6	0.69	0.77	0.65	0.62	0.69	0.66	0.66	0.67	0.682	0.66	Emx2	19	59458690	59465357	protein_coding	KNOWN
ENSMUSG00000040022	0.58	0.47	0.5	0.49	0.55	0.56	0.53	0.5	0.52	0.41	0.518	0.504	Rab11fip2	19	59902884	59943654	protein_coding	KNOWN
ENSMUSG00000057858	0.44	0.49	0.47	0.48	0.42	0.46	0.47	0.46	0.48	0.46	0.46	0.466	D19Ertd737e	19	60198586	60226697	protein_coding	KNOWN
ENSMUSG00000072437	0.31	0.46	0.5	0.55	0.61	0.56	0.52	0.47	0.47	0.31	0.486	0.466	Nanos1	19	60755987	60759913	protein_coding	KNOWN
ENSMUSG00000024991	0.46	0.5	0.5	0.47	0.46	0.45	0.47	0.48	0.48	0.47	0.478	0.47	Eif3a	19	60761116	60790693	protein_coding	KNOWN
ENSMUSG00000024993	0.54	0.57	0.54	0.52	0.57	0.56	0.53	0.57	0.57	0.54	0.548	0.554	Fam45a	19	60811585	60836227	protein_coding	KNOWN
ENSMUSG00000063698	0.4	0.48	0.44	0.42	0.42	0.37	0.48	0.44	0.41	0.42	0.432	0.424	Sfxn4	19	60837277	60861479	protein_coding	KNOWN
ENSMUSG00000024997	0.53	0.54	0.49	0.52	0.53	0.51	0.5	0.53	0.5	0.54	0.522	0.516	Prdx3	19	60864051	60874556	protein_coding	KNOWN
ENSMUSG00000003228	0.39	0.45	0.42	0.47	0.51	0.41	0.41	0.41	0.38	0.49	0.448	0.42	Grk5	19	60889749	61092553	protein_coding	KNOWN
ENSMUSG00000074733	0.58	0.64	0.56	0.62	0.6	0.6	0.58	0.49	0.57	0.63	0.6	0.574	5830428H23Rik	19	61053840	61140840	processed_transcript	NOVEL
ENSMUSG00000074732	0.46	0.62	0.67	0.5	0.27	0.62	0.42	0.33	0.77	0.69	0.504	0.566	Zfp950	19	61116967	61119181	protein_coding	KNOWN
ENSMUSG00000094649	0.03	0.05	0.07	0.03	0.13	0.06	0.08	0.05	0.01	0.01	0.062	0.042	AC165327.2	19	61174686	61176309	protein_coding	KNOWN
ENSMUSG00000059326	0.59	0.58	0.55	0.39	0.65	0.56	0.53	0.53	0.42	0.52	0.552	0.512	Csf2ra	19	61224402	61228418	protein_coding	KNOWN
