# Supplementary material for: Trappc9 deficiency causes parent-of-origin dependent microcephaly and obesity
Source: PLoS Genet. 2020 Sep 2;16(9):e1008916. doi: 10.1371/journal.pgen.1008916 (PMC7467316; doi:10.1371/journal.pgen.1008916)
Supplement: S2 Table — A list of the 22 distinct brain regions (40 parameters) measured in the study. Yellow highlights the parameters significantly changed in null mice comparing to wild-types. (XLSX) [file pgen.1008916.s017.xlsx]

## Sheet: Parameters
S2 Table	A list of the 22 distinct brain regions (40 parameters) measured in the neuroanatomical study.
	Yellow highlights the parameters significantly changed in null mice comparing to wild-types.
	Parameter	Description	Category	Unit
1	TB_area	Total brain area	Area	cm2
2	TB_width	Width of the total brain	Length	cm
3	TB_height_CS1	Height of the total brain at CS1 (coronal critical section 1)	Length	cm
4	TB_height_CS2	Height of the total brain at CS2 (coronal critical section 2)	Length	cm
5	TCTX_area	Total cortical area	Area	cm2
6	M2_length	Thickness of the secondary motor cortex	Length	cm
7	M1_length	Thickness of the primary motor cortex	Length	cm
8	Pons_height	Height of the pons	Length	cm
9	TC_area	Total cerebellar area	Area	cm2
10	IGL_area	Area of the internal granular layer of the cerebellum	Area	cm2
11	Folia	Number of cerebellar folia	Number	digit
12	Med_area	Area of the medial cerebellar nucleus	Area	cm2
13	LV_area	Lateral ventricle area	Area	cm2
14	cc_area	Corpus callosum area	Area	cm2
15	cc_length	Total outer length of the corpus callosum	Length	cm
16	cc_height	Corpus callosum thickness	Length	cm
17	TTh_area	Total thalamic area	Area	cm2
18	CPu_area	Caudate putamen area	Area	cm2
19	HP_area	Hippocampus area	Area	cm2
20	Rad_length	Length of the radiatum layer of the hippocampus	Length	cm
21	Or_length	Length of the oriens layer of the hippocampus	Length	cm
22	TILpy_area	Area of pyramidal cells of the hippocampus	Area	cm2
23	TILpy_length	Total internal length of pyramidal cell layer of the hippocampus	Length	cm
24	Mol_length	Length of the molecular layer of the hippocampus	Length	cm
25	DG_area	Dentate gyrus area	Area	cm2
26	DG_length	Dentate gyrus length	Length	cm
27	fi_area	Area of the fimbria of the hippocampus	Area	cm2
28	aca_area	Anterior commissure area	Area	cm2
29	sm_area	Stria medullaris area	Area	cm2
30	f_area	Fornix area	Area	cm2
31	och_area	Optic chiasm area	Area	cm2
32	VMHvl_area	Area of ventromedial nucleus of the hypothalamus	Area	cm2
33	Pn_area	Pontine nuclei area	Area	cm2
34	SN_area	Substantia nigra area	Area	cm2
35	fp_area	Area of fibre of pons	Area	cm2
36	Cg_area	Cingulate cortex area	Area	cm2
37	Cg_height	Height of the cingulate cortex	Length	cm
38	DS_area	Dorsal subiculum area	Area	cm2
39	InfC_area	Inferior colliculus area	Area	cm2
40	SupC_area	Superior colliculus area	Area	cm2

## Sheet: Data
Brain region	WT	WT	WT	WT	HOM	HOM	HOM	HOM	% change=ave (HOM)/ave(WT)	p-value of two-tail Student's t-test
TB_area	0.4487	0.3962	0.4405	0.3996	0.3799	0.3749	0.3586	0.3573	-0.127181	0.0109471
TB_height_CS2	0.6622	0.6231	0.64	0.6029	0.5729	0.5975	0.5351	0.5753	-0.0978562	0.0140525
SN_area	0.003345		0.005005	0.004864		0.002292	0.002446	0.001989	-0.490919	0.0168855
TTh_area	0.04909	0.04255	0.04599	0.04188	0.03624	0.03798	0.04161	0.03508	-0.159323	0.0172612
LV_area	0.01664	0.01548	0.01538	0.01675		0.01462	0.01201	0.0109	-0.221167	0.0175599
Cg_area		0.006757	0.008331	0.007079	0.004811	0.006104	0.005966	0.005084	-0.256834	0.0184838
M1_length	0.1335	0.1385	0.1378	0.1363	0.1261	0.1262	0.1057	0.124	-0.117378	0.0197255
TCTX_area	0.04331	0.03977	0.0454	0.04091	0.03934	0.03938	0.03781	0.03589	-0.100183	0.0302265
TB_width	0.7092	0.6967	0.7034	0.702	0.691	0.6507	0.6919	0.6628	-0.0408708	0.0355119
cc_area	0.01556	0.01416	0.01631	0.01371	0.0123	0.01298	0.01407	0.01281	-0.126883	0.0370568
fi_area	0.005843	0.004883	0.00429	0.004874	0.00405	0.004322	0.003673	0.004321	-0.177174	0.0483145
Cg_height	0.1268	0.1239	0.1377	0.1224	0.1028	0.1275	0.1093	0.1093	-0.121182	0.0504584
DS_area	0.001603	0.00127	0.001256	0.00125	0.001335	0.0007884	0.0009463	0.000973	-0.248429	0.0596261
Rad_length	0.03744	0.03371	0.03571	0.02951	0.03152	0.02897	0.02951	0.03097	-0.112928	0.0774399
TB_height_CS1	0.5116	0.5174	0.5269	0.548	0.4919	0.5211	0.446	0.4985	-0.0695851	0.0836362
Or_length	0.01778	0.01505	0.01652	0.01658	0.01369	0.01569	0.01596	0.01438	-0.0941908	0.0923255
TC_area	0.0776	0.07542	0.08221	0.05546		0.06128	0.05978	0.0605	-0.167223	0.143139
HP_area	0.02685	0.02089	0.02351	0.02045	0.02228	0.01902	0.02145	0.01932	-0.105016	0.200661
cc_length	0.7374	0.6582	0.6942	0.6569	0.6934	0.6106	0.6666	0.6305	-0.0530091	0.218478
DG_area	0.002146	0.001659	0.001809	0.001708	0.001692	0.001624	0.0018	0.001567	-0.0872712	0.233505
Mol_length	0.01931	0.0164	0.01571	0.01489	0.01722	0.01221	0.01585	0.01366	-0.111145	0.257647
aca_area	0.001421	0.001218	0.001388	0.001656	0.001256	0.001495		0.001136	-0.0880404	0.407732
M2_length	0.1259	0.1212	0.1141	0.1303	0.1241	0.1187	0.09935	0.125	-0.0495422	0.412134
sm_area	0.001197	0.001127	0.001025	0.000766		0.001247	0.0005536	0.0007373	-0.177675	0.416382
TILpy_length	0.2604	0.2451	0.2707	0.22	0.2482	0.2438	0.238	0.2355	-0.0308171	0.525333
DG_length	0.2137	0.1994	0.2083	0.2042	0.2301	0.1991	0.2222	0.1934	0.0232558	0.626546
cc_height	0.01587	0.02016	0.02101	0.02078	0.0184	0.01941	0.02209	0.01614	-0.0228733	0.805238
TILpy_area	0.001935	0.001821	0.001949	0.00181339	0.001984	0.001791	0.002059	0.001757	0.00965738	0.831803
och_area	0.001086	0.0009763	0.001019	0.0006223	0.0008877	0.001011		0.000945344	0.0238845	0.867824
InfC_area	0.01307	0.005571	0.008942	0.01381		0.01132	0.01035	0.0105	0.0362461	0.876019
f_area	0.0005516	0.0007079	0.0006902					0.0003141	n.a.	n.a.
IGL_area	0.03498					0.03173	0.03428	0.03057	n.a.	n.a.
Folia	8	8	8			8	8	8	n.a.	n.a.
Pons_height			0.2469	0.267	0.2682	0.2538	0.2599	0.2312	n.a.	n.a.
Med_area									n.a.	n.a.
CPu_area									n.a.	n.a.
VMHvl_area								0.001687	n.a.	n.a.
Pn_area			0.004079	0.001608		0.001823	0.002261	0.002091	n.a.	n.a.
fp_area			0.001312	0.001661		0.002455	0.001839	0.001301	n.a.	n.a.
SupC_area			0.02261			0.02227		0.01775	n.a.	n.a.
