# Supplementary material for: Trappc9 deficiency causes parent-of-origin dependent microcephaly and obesity
Source: PLoS Genet. 2020 Sep 2;16(9):e1008916. doi: 10.1371/journal.pgen.1008916 (PMC7467316; doi:10.1371/journal.pgen.1008916)
Supplement: S3 Data — (XLSX) [file pgen.1008916.s020.xlsx]

## Sheet: graphOB
Meg3_OB
sample (B6=Mother)	FAM	VIC	delta Ct	Log2(B6/CAST)	B6/CAST=M/P	AVE	Ratios
OB_S1	33.7744	25.4712	-8.30327	5.14494	35.3819	30.8498	0.968603
OB_S2	34.3774	26.2877	-8.08967	5.0325	32.7291		0.0313974
OB_S3	33.3941	25.6396	-7.75458	4.85611	28.9624
OB_S4	33.8629	26.3094	-7.55343	4.75022	26.9128
OB_S5	33.8929	26.0179	-7.87495	4.91948	30.2628
Sample	FAM	VIC	delta Ct	Log2(B6/CAST)	B6/CAST=P/M	AVE	Ratios
OB_M1	22.646	34.716	12.07	-5.57956	0.0209115	0.0251999	0.0245805
OB_M2	23.0294	35.3322	12.3027	-5.70206	0.0192092		0.975419
OB_M3	22.9142	34.778	11.8637	-5.47096	0.0225464
OB_M4	22.6557	33.5656	10.9099	-4.96889	0.0319313
OB_M5	22.6365	33.5923	10.9558	-4.99303	0.0314014
Meg3_OB
sample (B6=Mother)	B6/CAST=M/P	B6/total (M)	CAST/total (P)	Ave
OB_S1	35.3819	0.972514	0.0274862	0.971891
OB_S2	32.7291	0.970352	0.029648	STD
OB_S3	28.9624	0.966625	0.0333752	0.00576603
OB_S4	26.9128	0.964174	0.0358258	STE
OB_S5	30.2628	0.968013	0.0319869	0.00182338
Sample	B6/CAST=P/M	B6/total (P)	CAST/total (M)	Ave
OB_M1	0.0209115	0.0204832	0.979517	0.028109	-0.028109
OB_M2	0.0192092	0.0188471	0.981153	STE
OB_M3	0.0225464	0.0220492	0.977951	0.00576603
OB_M4	0.0319313	0.0309432	0.969057	STE
OB_M5	0.0314014	0.0304454	0.969555	0.00182338
Peg13_OB
Sample (B6=Mother)	FAM	VIC	delta Ct	Log2(B6/CAST)	B6/CAST=M/P	AVE	Ratios
OB_S1	24.129	40	15.871	-11.0372	0.000475864	0.000567108	0.000566787
OB_S2	24.79	40	15.21	-10.5778	0.000654266		0.999433
OB_S3	24.371	40	15.629	-10.869	0.000534688
OB_S4	24.7846	40	15.2154	-10.5816	0.000652576
OB_S5	24.3057	40	15.6943	-10.9143	0.000518148
Sample	FAM	VIC	delta Ct	Log2(B6/CAST)	B6/CAST=P/M	AVE	Ratios
OB_M1	37.2634	25.236	-12.0275	8.34948	326.169	429.413	0.997677
OB_M2	38.565	25.3088	-13.2561	9.20328	589.47		0.00232335
OB_M3	38.0048	25.1757	-12.8291	8.90652	479.878
OB_M4	38.1108	25.1088	-13.002	9.02668	521.557
OB_M5	36.897	25.5949	-11.3021	7.84544	229.991
Peg13_OB
Sample (B6=Mother)	B6/CAST=M/P	B6/total (M)	CAST/total (P)	Ave
OB_S1	0.000475864	0.000475638	0.999524	0.00159064
OB_S2	0.000654266	0.000653838	0.999346	STD
OB_S3	0.000534688	0.000534403	0.999466	0.00130258
OB_S4	0.000652576	0.000652151	0.999348	STE
OB_S5	0.000518148	0.00051788	0.999482	0.000411911
Sample	B6/CAST=P/M	B6/total (P)	CAST/total (M)	Ave
OB_M1	326.169	0.996943	0.00305652	0.998409	-0.998409
OB_M2	589.47	0.998306	0.00169356	STE
OB_M3	479.878	0.99792	0.00207953	0.00130258
OB_M4	521.557	0.998086	0.00191367	STE
OB_M5	229.991	0.995671	0.00432917	0.000411911
Grb10_OB
Sample	FAM	VIC	delta Ct=VIC-FAM	Log2(B6/CAST)	B6/CAST=M/P	AVE	Ratios
MOE_S1	24.3252	30.2728	5.94755	-3.73837	0.0749269	0.0837206	0.0772529
MOE_S2	24.8878	31.0064	6.11856	-3.86464	0.0686481		0.922747
MOE_S3	24.5138	30.2412	5.7274	-3.57584	0.0838621
MOE_S4	24.6682	29.9815	5.31323	-3.27006	0.103661
MOE_S5	24.6631	30.3074	5.6443	-3.51449	0.0875052
Sample	FAM	VIC	delta Ct=VIC-FAM	Log2(B6/CAST)	B6/CAST =P/M	AVE	Ratios
MOE_M1	26.5442	25.7585	-0.785695	1.23278	2.35019	2.85107	0.740332
MOE_M2	26.9894	25.7353	-1.25408	1.57859	2.98677		0.259668
MOE_M3	27.2907	25.6845	-1.60626	1.8386	3.57663
MOE_M4	26.9622	25.4684	-1.49373	1.75552	3.37648
MOE_M5	26.1367	25.7005	-0.436176	0.974728	1.96527
Grb10_OB
Sample	B6/CAST=M/P	B6/total (M)	CAST/total (P)	Ave
MOE_S1	0.0749269	0.0697041	0.930296	0.171926
MOE_S2	0.0686481	0.0642383	0.935762	STD
MOE_S3	0.0838621	0.0773734	0.922627	0.105608
MOE_S4	0.103661	0.0939244	0.906076	STE
MOE_S5	0.0875052	0.0804642	0.919536	0.0333961
Sample	B6/CAST =P/M	B6/total (P)	CAST/total (M)	Ave
MOE_M1	2.35019	0.70151	0.29849	0.828074	-0.828074
MOE_M2	2.98677	0.749171	0.250829	STE
MOE_M3	3.57663	0.781499	0.218501	0.105608
MOE_M4	3.37648	0.771506	0.228494	STE
MOE_M5	1.96527	0.662763	0.337237	0.0333961
Ube3a_OB
Sample			x	y
Mean Ct value	FAM	VIC	delta Ct=VIC-FAM	Log2(B6/CAST)	B6/CAST=M/P	AVE	Ratios
MOE_S1	25.8793	25.0351	-0.844233	0.939397	1.91773	2.1281	0.680318
MOE_S2	26.4174	25.432	-0.985378	1.06345	2.08992		0.319682
MOE_S3
MOE_S4	26.6914	25.5273	-1.16412	1.22054	2.33035
MOE_S5	26.704	25.6536	-1.05044	1.12063	2.17442
Mean Ct value	FAM	VIC	delta Ct=VIC-FAM	Log2(B6/CAST)	B6/CAST =P/M	AVE	Ratios
MOE_M1	25.2453	27.3492	2.10387	-1.65169	0.318267	0.259459	0.206008
MOE_M2	25.2371	27.8892	2.65215	-2.13358	0.227892		0.793992
MOE_M3	25.1955	28.0624	2.86688	-2.3223	0.199948
MOE_M4	25.227	27.8466	2.61955	-2.10492	0.232464
MOE_M5	25.0261	27.1276	2.10152	-1.64962	0.318723
Ube3a_OB
Sample	B6/CAST=M/P	B6/total (M)	CAST/total (P)	Ave
MOE_S1	1.91773	0.657267	0.342733	0.74382
MOE_S2	2.08992	0.676367	0.323633	STD
MOE_S3				0.0665586
MOE_S4	2.33035	0.699731	0.300269	STE
MOE_S5	2.17442	0.684982	0.315018	0.0221862
Sample	B6/CAST =P/M	B6/total (P)	CAST/total (M)	Ave
MOE_M1	0.318267	0.241428	0.758572	0.25618	-0.25618
MOE_M2	0.227892	0.185596	0.814404	STE
MOE_M3	0.199948	0.166631	0.833369	0.0665586
MOE_M4	0.232464	0.188617	0.811383	STE
MOE_M5	0.318723	0.241691	0.758309	0.0221862
Th_OB
Sample	FAM	VIC	delta Ct	Log2(B6/CAST)	B6/CAST=M/P	AVE	Ratios
OB_S1	22.5893	23.6935	1.10419	-0.439654	0.737311	0.733281	0.423059
OB_S2	23.3983	24.5504	1.15212	-0.489185	0.712428		0.576941
OB_S3	22.7914	23.9675	1.17609	-0.513958	0.700299
OB_S4	23.1917	24.2606	1.06884	-0.403128	0.756217
OB_S5	23.0861	24.1476	1.0616	-0.395647	0.760148
Sample	FAM	VIC	delta Ct	Log2(B6/CAST)	B6/CAST=P/M
OB_M1	22.983	24.3713	1.38833	-0.733267	0.60154	0.643778	0.391645
OB_M2	23	24.3038	1.30388	-0.646001	0.639049		0.608355
OB_M3	23.1743	24.3504	1.17611	-0.513978	0.700289
OB_M4	23.0016	24.3213	1.31968	-0.66232	0.631861
OB_M5	23.3396	24.6281	1.28846	-0.630064	0.646148
Th_OB
Sample	B6/CAST=M/P	B6/total (M)	CAST/total (P)	Ave
OB_S1	0.737311	0.424398	0.575602	0.515768
OB_S2	0.712428	0.416034	0.583966	STD
OB_S3	0.700299	0.411868	0.588132	0.098403
OB_S4	0.756217	0.430594	0.569406	STE
OB_S5	0.760148	0.431866	0.568134	0.0311178
Sample	B6/CAST=P/M	B6/total (P)	CAST/total (M)	Ave
OB_M1	0.60154	0.375601	0.624399	0.484232	-0.484232
OB_M2	0.639049	0.38989	0.61011	STE
OB_M3	0.700289	0.411865	0.588135	0.098403
OB_M4	0.631861	0.387203	0.612797	STE
OB_M5	0.646148	0.392521	0.607479	0.0311178
Trappc9_OB
sample	FAM	VIC	delta Ct	Log2(B6/CAST)	B6/CAST=M/P	AVE	Ratios
OB_S1	25.1584	26.1107	0.952278	0.452428	1.36834	1.37895	0.579646
OB_S2	25.8926	26.7789	0.886339	0.528324	1.44225		0.420354
OB_S3	25.3306	26.3054	0.974789	0.426518	1.34399
OB_S4	25.6278	26.5851	0.957272	0.44668	1.3629
OB_S5	25.3985	26.3426	0.944132	0.461804	1.37726
sample	FAM	VIC	delta Ct	Log2(B6/CAST)	B6/CAST=P/M	AVE	Ratios
OB_M1	24.6775	27.6031	2.92564	-1.81891	0.283435	0.286908	0.222944
OB_M2	24.7456	27.7079	2.96232	-1.86113	0.275261		0.777056
OB_M3	24.9964	27.8474	2.85103	-1.73303	0.300819
OB_M4	24.6197	27.4784	2.85874	-1.74191	0.298974
OB_M5	25.0378	27.9965	2.95871	-1.85698	0.276054
Trappc9_OB
sample (B6=Mother)	B6/CAST=M/P	B6/total (M)	CAST/total (P)	Ave
OB_S1	1.36834	0.577764	0.422236	0.678338
OB_S2	1.44225	0.590542	0.409458	STD
OB_S3	1.34399	0.573376	0.426624	0.104325
OB_S4	1.3629	0.576791	0.423209	STE
OB_S5	1.37726	0.579348	0.420652	0.0329904
Sample	B6/CAST=P/M	B6/total (P)	CAST/total (M)	Ave
OB_M1	0.283435	0.220841	0.779159	0.321662	-0.321662
OB_M2	0.275261	0.215847	0.784153	STE
OB_M3	0.300819	0.231253	0.768747	0.104325
OB_M4	0.298974	0.230162	0.769838	STE
OB_M5	0.276054	0.216334	0.783666	0.0329904
Cdh15_OB
Sample	FAM	VIC	delta Ct=VIC-FAM	Log2(B6/CAST)	B6/CAST=M/P	AVE	Ratios
OB_S1	25.5618	28.1365	2.57472	-3.40048	0.094701	0.0355408	0.034321
OB_S2	25.5621	35	9.43789	-10.3467	0.000767956		0.965679
OB_S3	26.0221	35	8.97786	-9.88109	0.00106046
OB_S4	26.1098	28.9175	2.80768	-3.63626	0.0804225
OB_S5	25.5319	35	9.46805	-10.3772	0.000751876
Sample	FAM	VIC	delta Ct=VIC-FAM	Log2(B6/CAST)	B6/CAST=P/M	AVE	Ratios
OB_M1	27.0604	24.7665	-2.2939	1.52706	2.88197	2.02274	0.669175
OB_M2	28.3941	27.7624	-0.631693	-0.155264	0.897968		0.330825
OB_M3	28.9378	28.0064	-0.931343	0.148012	1.10804
OB_M4	28.2476	25.2477	-2.99995	2.24164	4.72936
OB_M5	29.086	29.2993	0.213298	-1.01048	0.496381
Cdh15_OB
Sample	B6/CAST=M/P	B6/total (M)	CAST/total (P)	Ave
OB_S1	0.094701	0.0865086	0.913491	0.22652
OB_S2	0.000767956	0.000767367	0.999233	STD
OB_S3	0.00106046	0.00105934	0.998941	0.246299
OB_S4	0.0804225	0.0744362	0.925564	STE
OB_S5	0.000751876	0.000751311	0.999249	0.0778865
Sample	B6/CAST=P/M	B6/total (P)	CAST/total (M)	Ave
OB_M1	2.88197	0.742399	0.257601	0.77348	-0.77348
OB_M2	0.897968	0.473121	0.526879	STE
OB_M3	1.10804	0.525626	0.474374	0.246299
OB_M4	4.72936	0.82546	0.17454	STE
OB_M5	0.496381	0.331721	0.668279	0.0778865
Ago2 (Eif2c2)_OB
Sample	FAM	VIC	delta Ct=VIC-FAM	Log2(B6/CAST)	B6/CAST=M/P	AVE	Ratios
OB_S1	23.3273	23.6088	0.281445	0.473162	1.38815	1.54726	0.607421
OB_S2	23.322	23.383	0.061077	0.735179	1.6646		0.392579
OB_S3	23.2649	23.3928	0.127822	0.65582	1.57551
OB_S4	23.1277	23.3806	0.252862	0.507146	1.42124
OB_S5	23.3176	23.3626	0.045013	0.75428	1.68679
Sample	FAM	VIC	delta Ct=VIC-FAM	Log2(B6/CAST)	B6/CAST=P/M	AVE	Ratios
OB_M1	22.6616	24.2078	1.54618	-1.03061	0.489503	0.43875	0.304952
OB_M2	22.781	24.515	1.73396	-1.25388	0.41932		0.695048
OB_M3	22.6517	24.3622	1.71054	-1.22603	0.427492
OB_M4	22.7307	24.4374	1.70677	-1.22154	0.428823
OB_M5	22.5296	24.237	1.70737	-1.22226	0.42861
Ago2 (Eif2c2)_OB
Sample	B6/CAST=M/P	B6/total (M)	CAST/total (P)	Ave
OB_S1	1.38815	0.581266	0.418734	0.650881
OB_S2	1.6646	0.62471	0.37529	STD
OB_S3	1.57551	0.611728	0.388272	0.0497288
OB_S4	1.42124	0.586988	0.413012	STE
OB_S5	1.68679	0.627809	0.372191	0.0157256
Sample	B6/CAST=P/M	B6/total (P)	CAST/total (M)	Ave
OB_M1	0.489503	0.328635	0.671365	0.349119	-0.349119
OB_M2	0.41932	0.295437	0.704563	STE
OB_M3	0.427492	0.29947	0.70053	0.0497288
OB_M4	0.428823	0.300123	0.699877	STE
OB_M5	0.42861	0.300019	0.699981	0.0157256
Gabra5_OB
Sample
Mean Ct value	FAM	VIC	delta Ct=VIC-FAM	Log2(B6/CAST)	B6/CAST=M/P	AVE	Ratios
OB_S1	20.9461	21.6485	0.702397	0.0733398	1.05215	1.09426	0.522504
OB_S2	21.067	21.6354	0.568461	0.198516	1.14752		0.477496
OB_S3	21.2172	21.8553	0.638078	0.133452	1.09692
OB_S4	21.1519	21.7465	0.594578	0.174107	1.12827
OB_S5	21.0103	21.7211	0.710785	0.0655003	1.04645
Mean Ct value	FAM	VIC	delta Ct=VIC-FAM	Log2(B6/CAST)	B6/CAST=P/M	AVE	Ratios
OB_M1	21.0028	21.6219	0.619089	0.151199	1.11049	1.118	0.527856
OB_M2	20.8336	21.4715	0.63788	0.133637	1.09706		0.472144
OB_M3	20.9758	21.6284	0.652627	0.119855	1.08663
OB_M4	20.7959	21.337	0.541111	0.224078	1.16803
OB_M5	21.2593	21.8545	0.595236	0.173492	1.12779
Gabra5_OB
Sample	B6/CAST=M/P	B6/total (M)	CAST/total (P)	Ave
OB_S1	1.05215	0.512706	0.487294	0.497279
OB_S2	1.14752	0.534346	0.465654	STD
OB_S3	1.09692	0.523109	0.476891	0.0276745
OB_S4	1.12827	0.530134	0.469866	STE
OB_S5	1.04645	0.511348	0.488652	0.00875144
Sample	B6/CAST=P/M	B6/total (P)	CAST/total (M)	Ave
OB_M1	1.11049	0.526177	0.473823	0.502721	-0.502721
OB_M2	1.09706	0.523141	0.476859	STE
OB_M3	1.08663	0.520757	0.479243	0.0276745
OB_M4	1.16803	0.538752	0.461248	STE
OB_M5	1.12779	0.530028	0.469972	0.00875144
FosB_OB
Sample	FAM	VIC	delta Ct=VIC-FAM	Log2(B6/CAST)	B6/CAST=M/P	AVE	Ratios
OB_S1	21.9711	22.7882	0.817105	0.708201	1.63377	1.62936	0.61968
OB_S2	21.9386	22.7624	0.823814	0.703777	1.62876		0.38032
OB_S3	22.2124	23.0067	0.794325	0.723222	1.65086
OB_S4	22.3111	23.0578	0.746696	0.754629	1.6872
OB_S5	21.5007	22.4383	0.937589	0.628754	1.54623
Sample	FAM	VIC	delta Ct=VIC-FAM	Log2(B6/CAST)	B6/CAST=P/M	AVE	Ratios
OB_M1	25.0695	25.845	0.775453	0.735666	1.66517	1.57406	0.611508
OB_M2	23.3352	24.2454	0.91019	0.646821	1.56571		0.388492
OB_M3	22.7623	23.5808	0.818539	0.707255	1.6327
OB_M4	22.7622	23.845	1.08279	0.533007	1.44694
OB_M5	25.0341	25.9526	0.918512	0.641333	1.55977
FosB_OB
Sample	B6/CAST=M/P	B6/total (M)	CAST/total (P)	Ave
OB_S1	1.63377	0.620315	0.379685	0.504194
OB_S2	1.62876	0.619593	0.380407	STD
OB_S3	1.65086	0.622765	0.377235	0.122015
OB_S4	1.6872	0.627865	0.372135	STE
OB_S5	1.54623	0.607262	0.392738	0.0385845
Sample	B6/CAST=P/M	B6/total (P)	CAST/total (M)	Ave
OB_M1	1.66517	0.624789	0.375211	0.495806	-0.495806
OB_M2	1.56571	0.610245	0.389755	STE
OB_M3	1.6327	0.620161	0.379839	0.122015
OB_M4	1.44694	0.591327	0.408673	STE
OB_M5	1.55977	0.60934	0.39066	0.0385845
Phf7_OB
Sample	FAM	VIC	delta Ct=VIC-FAM	Log2(B6/CAST)	B6/CAST=M/P	AVE	Ratios
OB_S1	27.9763	28.2495	0.273187	-0.17699	0.884546	0.949363	0.487012
OB_S2	27.9311	28.1606	0.229528	-0.128712	0.914648		0.512988
OB_S3	28.2353	28.3437	0.108406	0.00522465	1.00363
OB_S4	28.1397	28.2636	0.123893	-0.0119009	0.991785
OB_S5	27.9657	28.1427	0.177025	-0.0706542	0.952206
Sample	FAM	VIC	delta Ct=VIC-FAM	Log2(B6/CAST)	B6/CAST=P/M	AVE	Ratios
OB_M1	27.4173	27.7132	0.295828	-0.202027	0.869329	0.884361	0.469316
OB_M2	27.4152	27.7201	0.30484	-0.211992	0.863344		0.530684
OB_M3	27.3929	27.6566	0.26375	-0.166555	0.890968
OB_M4	27.4527	27.7073	0.254597	-0.156433	0.89724
OB_M5	27.4867	27.7359	0.24925	-0.150521	0.900925
Phf7_OB
Sample	B6/CAST=M/P	B6/total (M)	CAST/total (P)	Ave
OB_S1	0.884546	0.469368	0.530632	0.508727
OB_S2	0.914648	0.477711	0.522289	STD
OB_S3	1.00363	0.500905	0.499095	0.0250295
OB_S4	0.991785	0.497938	0.502062	STE
OB_S5	0.952206	0.487759	0.512241	0.00791502
Sample	B6/CAST=P/M	B6/total (P)	CAST/total (M)	Ave
OB_M1	0.869329	0.465049	0.534951	0.491273	-0.491273
OB_M2	0.863344	0.463331	0.536669	STE
OB_M3	0.890968	0.47117	0.52883	0.0250295
OB_M4	0.89724	0.472919	0.527081	STE
OB_M5	0.900925	0.47394	0.52606	0.00791502
Cyp1a1_OB
Sample	FAM	VIC	delta Ct=VIC-FAM	Log2(B6/CAST)	B6/CAST=M/P	AVE	Ratios
OB_S1	31.2403	30.5142	-0.726075	1.65006	3.13846	1.38353	0.580453
OB_S2	31.6684	32.2803	0.611932	-0.113971	0.924041		0.419547
OB_S3	31.7721	32.1212	0.349095	0.232552	1.17491
OB_S4	31.6551	32.3064	0.651353	-0.165944	0.891345
OB_S5	31.2078	31.9928	0.784998	-0.342141	0.78887
Sample	FAM	VIC	delta Ct=VIC-FAM	Log2(B6/CAST)	B6/CAST=P/M	AVE	Ratios
OB_M1	30.6437	28.5926	-2.05104	3.39689	10.5333	7.28628	0.879319
OB_M2	30.7665	29.4561	-1.31038	2.4204	5.3532		0.120681
OB_M3	30.4611	29.5112	-0.9499	1.94515	3.85077
OB_M4	31.2082	31.4398	0.231643	0.387402	1.30804
OB_M5	28.3868	25.9211	-2.46568	3.94355	15.3861
Cyp1a1_OB
Sample	B6/CAST=M/P	B6/total (M)	CAST/total (P)	Ave
OB_S1	3.13846	0.758364	0.241636	0.363565
OB_S2	0.924041	0.480261	0.519739	STD
OB_S3	1.17491	0.540211	0.459789	0.225735
OB_S4	0.891345	0.471276	0.528724	STE
OB_S5	0.78887	0.440988	0.559012	0.0713836
Sample	B6/CAST=P/M	B6/total (P)	CAST/total (M)	Ave
OB_M1	10.5333	0.913295	0.0867053	0.636435	-0.636435
OB_M2	5.3532	0.842599	0.157401	STE
OB_M3	3.85077	0.793847	0.206153	0.225735
OB_M4	1.30804	0.566731	0.433269	STE
OB_M5	15.3861	0.938973	0.0610275	0.0713836
~Strain by Parent-of-origin Interaction

## Sheet: graphMOE
Meg3 _MOE	undeterminated	very low expression	0
Peg13_MOE
Sample	FAM	VIC	delta Ct=VIC-FAM	Log2(B6/CAST)	B6/CAST=M/P	AVE	Ratios
MOE_S1	26.0064	40	13.9936	-8.33138	0.0031046	0.00615329	0.00611565
MOE_S2	26.2071	37.9174	11.7103	-6.79657	0.00899559		0.993884
MOE_S3	25.3271	37.582	12.2549	-7.16265	0.00697953
MOE_S4	25.0725	39.079	14.0065	-8.34008	0.00308593
MOE_S5	25.5911	37.3977	11.8066	-6.86132	0.00860078
Sample	FAM	VIC	delta Ct=VIC-FAM	Log2(B6/CAST)	B6/CAST=P/M
MOE_M1	32.6583	26.1283	-6.53004	5.46459	44.1576	31.7683	0.969483
MOE_M2	31.4996	25.4922	-6.00746	5.11331	34.6147		0.0305173
MOE_M3	31.2576	25.3925	-5.86506	5.0176	32.3927
MOE_M4	32.9314	28.0901	-4.84128	4.32941	20.104
MOE_M5	31.3567	25.8375	-5.51926	4.78514	27.5722
Sample	B6/CAST=M/P	B6/total (M)	CAST/total (P)	Ave
MOE_S1	0.0031046	0.00309499	0.996905	0.0193098
MOE_S2	0.00899559	0.0089154	0.991085	STD
MOE_S3	0.00697953	0.00693115	0.993069	0.015407
MOE_S4	0.00308593	0.00307644	0.996924	STE
MOE_S5	0.00860078	0.00852744	0.991473	0.00487212
Sample	B6/CAST=P/M	B6/total (P)	CAST/total (M)	Ave
MOE_M1	44.1576	0.977855	0.0221447	0.98069	-0.98069
MOE_M2	34.6147	0.971922	0.0280783	STE
MOE_M3	32.3927	0.970053	0.0299467	0.015407
MOE_M4	20.104	0.952616	0.0473844	STE
MOE_M5	27.5722	0.965001	0.034999	0.00487212
Grb10_MOE
Sample	FAM	VIC	delta Ct=VIC-FAM	Log2(B6/CAST)	B6/CAST=M/P	AVE	Ratios
MOE_S1	31.8609	26.8709	-4.99	4.11649	17.3455	8.85317	0.89851
MOE_S2	29.8975	26.846	-3.05149	2.45738	5.49218		0.10149
MOE_S3	28.405	26.4409	-1.96407	1.52669	2.88123
MOE_S4	30.2632	26.2796	-3.98366	3.25519	9.54797
MOE_S5	30.4355	26.5517	-3.88383	3.16976	8.99895
Sample	FAM	VIC	delta Ct=VIC-FAM	Log2(B6/CAST)	B6/CAST =P/M
MOE_M1	25.7675	33.3714	7.60388	-6.66223	0.00987343	0.0107885	0.0106734
MOE_M2	25.3273	34.3534	9.0261	-7.87947	0.00424663		0.989327
MOE_M3	25.3395	33.5866	8.24712	-7.21276	0.00674129
MOE_M4	27.2664	35.0475	7.78116	-6.81396	0.00888778
MOE_M5	25.7911	31.8842	6.09313	-5.36923	0.0241936
Sample	B6/CAST=M/P	B6/total (M)	CAST/total (P)	Ave
MOE_S1	17.3455	0.945491	0.0545093	0.928586
MOE_S2	5.49218	0.845969	0.154031	STD
MOE_S3	2.88123	0.74235	0.25765	0.0829089
MOE_S4	9.54797	0.905195	0.094805	STE
MOE_S5	8.99895	0.89999	0.10001	0.0262181
Sample	B6/CAST =P/M	B6/total (P)	CAST/total (M)	Ave
MOE_M1	0.00987343	0.0097769	0.990223	0.071414	-0.071414
MOE_M2	0.00424663	0.00422867	0.995771	STE
MOE_M3	0.00674129	0.00669615	0.993304	0.0829089
MOE_M4	0.00888778	0.00880948	0.991191	STE
MOE_M5	0.0241936	0.0236221	0.976378	0.0262181
Ube3a_MOE
Sample	FAM	VIC	delta Ct=VIC-FAM	Log2(B6/CAST)	B6/CAST=M/P	AVE	Ratios
MOE_S1	27.5133	29.5124	1.99908	-0.84383	0.557162	0.89726	0.472924
MOE_S2	27.6201	28.2605	0.640339	-0.00154615	0.998929		0.527076
MOE_S3	27.1789	27.7229	0.544037	0.0581518	1.04113
MOE_S4	26.6182	27.483	0.864823	-0.140704	0.907077
MOE_S5	27.0107	27.6908	0.680121	-0.0262068	0.981999
Sample	FAM	VIC	delta Ct=VIC-FAM	Log2(B6/CAST)	B6/CAST =P/M	AVE	Ratios
MOE_M1	26.6067	27.3826	0.775811	-0.0855255	0.942441	0.969352	0.492219
MOE_M2	26.7475	27.4495	0.701977	-0.0397553	0.97282		0.507781
MOE_M3	26.4354	27.1567	0.721376	-0.0517812	0.964744
MOE_M4	28.4983	29.1428	0.644489	-0.00411894	0.997149
MOE_M5	26.7677	27.4774	0.709681	-0.0445313	0.969605
Sample	B6/CAST=M/P	B6/total (M)	CAST/total (P)	Ave
MOE_S1	0.557162	0.357806	0.642194	0.487782
MOE_S2	0.998929	0.499732	0.500268	STD
MOE_S3	1.04113	0.510076	0.489924	0.0469627
MOE_S4	0.907077	0.475637	0.524363	STE
MOE_S5	0.981999	0.495459	0.504541	0.0148509
Sample	B6/CAST =P/M	B6/total (P)	CAST/total (M)	Ave
MOE_M1	0.942441	0.485184	0.514816	0.512218	-0.512218
MOE_M2	0.97282	0.493111	0.506889	STE
MOE_M3	0.964744	0.491028	0.508972	0.0469627
MOE_M4	0.997149	0.499286	0.500714	STE
MOE_M5	0.969605	0.492284	0.507716	0.0148509
Th_MOE
Sample	FAM	VIC	delta Ct	Log2(B6/CAST)	B6/CAST=M/P	AVE	Ratios
OB_S1	30.325	31.0364	0.711412	0.745396	1.67643	1.72129	0.632528
OB_S2	27.2396	27.8332	0.593563	0.828986	1.77644		0.367472
OB_S3	26.0937	26.6686	0.574872	0.842243	1.79284
OB_S4	27.7025	28.5415	0.838961	0.654925	1.57453
OB_S5	28.086	28.6684	0.582384	0.836915	1.78623
Sample		VIC	delta Ct	Log2(B6/CAST)	B6/CAST=P/M
OB_M1	28.5758	29.2494	0.673622	0.7722	1.70787	1.66187	0.624324
OB_M2	29.8279	30.4996	0.671727	0.773544	1.70946		0.375676
OB_M3	28.9456	29.7636	0.818008	0.669787	1.59084
OB_M4	31.8706	32.6884	0.817736	0.66998	1.59105
OB_M5	28.412	29.0829	0.670939	0.774103	1.71013
Sample	B6/CAST=M/P	B6/total (M)	CAST/total (P)	Ave
OB_S1	1.67643	0.626369	0.373631	0.504008
OB_S2	1.77644	0.639826	0.360174	STD
OB_S3	1.79284	0.641941	0.358059	0.135509
OB_S4	1.57453	0.61158	0.38842	STE
OB_S5	1.78623	0.641092	0.358908	0.0428517
Sample	B6/CAST=P/M	B6/total (P)	CAST/total (M)	Ave
OB_M1	1.70787	0.630706	0.369294	0.495992	-0.495992
OB_M2	1.70946	0.630923	0.369077	STE
OB_M3	1.59084	0.614024	0.385976	0.135509
OB_M4	1.59105	0.614056	0.385944	STE
OB_M5	1.71013	0.631014	0.368986	0.0428517
Trappc9_MOE
Sample	FAM	VIC	delta Ct=VIC-FAM	Log2(B6/CAST)	B6/CAST=M/P	AVE	Ratios
MOE_S1	25.9946	26.7046	0.709993	0.0535668	1.03783	1.20763	0.547025
MOE_S2	26.6169	27.094	0.477048	0.295153	1.22702		0.452975
MOE_S3	25.9625	26.43	0.46757	0.304983	1.2354
MOE_S4	25.8634	26.2299	0.366535	0.409767	1.32847
MOE_S5	26.1035	26.6006	0.497143	0.274313	1.20942
Sample	FAM	VIC	delta Ct=VIC-FAM	Log2(B6/CAST)	B6/CAST=P/M
MOE_M1	26.2967	27.1596	0.862895	-0.105008	0.9298	0.875955	0.466938
MOE_M2	25.3997	26.2784	0.878652	-0.12135	0.919327		0.533062
MOE_M3	25.1478	26.0641	0.916333	-0.160429	0.894759
MOE_M4	27.1922	28.157	0.964759	-0.210651	0.864147
MOE_M5	25.9719	27.094	1.12208	-0.373808	0.771743
Sample	B6/CAST=M/P	B6/total (M)	CAST/total (P)	Ave
MOE_S1	1.03783	0.509281	0.490719	0.539866
MOE_S2	1.22702	0.550968	0.449032	STD
MOE_S3	1.2354	0.552654	0.447346	0.0205624
MOE_S4	1.32847	0.570534	0.429466	STE
MOE_S5	1.20942	0.547392	0.452608	0.00650241
Sample	B6/CAST=P/M	B6/total (P)	CAST/total (M)	Ave
MOE_M1	0.9298	0.481811	0.518189	0.460134	-0.460134
MOE_M2	0.919327	0.478984	0.521016	STE
MOE_M3	0.894759	0.472228	0.527772	0.0205624
MOE_M4	0.864147	0.463562	0.536438	STE
MOE_M5	0.771743	0.435584	0.564416	0.00650241
Cdh15_MOE
Sample	FAM	VIC	delta Ct=VIC-FAM	Log2(B6/CAST)	B6/CAST=M/P	AVE	Ratios
OB_S1	25.4973	26.8671	1.36985	0.40794	1.32679	1.31063	0.567218
OB_S2	25.1684	26.5402	1.3718	0.406416	1.32539		0.432782
OB_S3	24.4288	25.8842	1.4554	0.341259	1.26686
OB_S4	24.3363	25.7805	1.44427	0.349938	1.27451
OB_S5	24.8479	26.1725	1.32461	0.443201	1.35962
Sample	FAM	VIC	delta Ct=VIC-FAM	Log2(B6/CAST)	B6/CAST=P/M
OB_M1	24.1157	24.7085	0.592772	1.01359	2.01893	1.74539	0.635753
OB_M2	23.9727	24.7926	0.819935	0.836543	1.78577		0.364247
OB_M3	23.8148	24.9624	1.14763	0.581138	1.49603
OB_M4	26.0864	26.9181	0.831713	0.827363	1.77444
OB_M5	24.3868	25.3511	0.964303	0.724022	1.65178
Sample	B6/CAST=M/P	B6/total (M)	CAST/total (P)	Ave
OB_S1	1.32679	0.570223	0.429777	0.466398
OB_S2	1.32539	0.569964	0.430036	STD
OB_S3	1.26686	0.558861	0.441139	0.107638
OB_S4	1.27451	0.560344	0.439656	STE
OB_S5	1.35962	0.576202	0.423798	0.034038
Sample	B6/CAST=P/M	B6/total (P)	CAST/total (M)	Ave
OB_M1	2.01893	0.668757	0.331243	0.533602	-0.533602
OB_M2	1.78577	0.641032	0.358968	STE
OB_M3	1.49603	0.599364	0.400636	0.107638
OB_M4	1.77444	0.639567	0.360433	STE
OB_M5	1.65178	0.622895	0.377105	0.034038
Ago2_MOE
sample	FAM	VIC	delta Ct=VIC-FAM	Log2(B6/CAST)	B6/CAST=M/P	AVE	Ratios
OB_S1	25.0506	25.9625	0.911931	-0.2128	0.862861	0.831587	0.454025
OB_S2	24.9018	25.7962	0.89438	-0.192294	0.875213		0.545975
OB_S3	23.9112	24.7476	0.836403	-0.124553	0.917288
OB_S4	23.9431	24.8923	0.949188	-0.256331	0.837214
OB_S5	23.2229	24.4558	1.23288	-0.587792	0.66536
Sample	FAM	VIC	delta Ct=VIC-FAM	Log2(B6/CAST)	B6/CAST=P/M
OB_M1	23.3963	24.5689	1.17256	-0.517318	0.698669	0.714079	0.416596
OB_M2	23.5056	24.6607	1.15503	-0.496841	0.708657		0.583404
OB_M3	22.9933	24.1481	1.15476	-0.496525	0.708812
OB_M4	25.1861	26.3161	1.12997	-0.46756	0.723186
OB_M5	23.8339	24.9504	1.11659	-0.45192	0.731069
sample	B6/CAST=M/P	B6/total (M)	CAST/total (P)	Ave
OB_S1	0.862861	0.463191	0.536809	0.518073
OB_S2	0.875213	0.466727	0.533273	STD
OB_S3	0.917288	0.47843	0.52157	0.0719552
OB_S4	0.837214	0.455698	0.544302	STE
OB_S5	0.66536	0.399529	0.600471	0.0227542
Sample	B6/CAST=P/M	B6/total (P)	CAST/total (M)	Ave
OB_M1	0.698669	0.411304	0.588696	0.481927	-0.481927
OB_M2	0.708657	0.414745	0.585255	STE
OB_M3	0.708812	0.414798	0.585202	0.0719552
OB_M4	0.723186	0.41968	0.58032	STE
OB_M5	0.731069	0.422322	0.577678	0.0227542
Gabra5_MOE
Sample	FAM	VIC	delta Ct=VIC-FAM	Log2(B6/CAST)	B6/CAST=M/P	AVE	Ratios
OB_S1	29.4267	31.2637	1.837	-1.22634	0.427399	0.871148	0.465569
OB_S2	25.5379	26.0414	0.503454	0.0454559	1.03201		0.534431
OB_S3	25.5233	25.9728	0.449535	0.0968785	1.06946
OB_S4	28.1702	29.0127	0.842449	-0.277844	0.824823
OB_S5	27.1312	27.6792	0.548014	0.00295905	1.00205
Sample	FAM	VIC	delta Ct=VIC-FAM	Log2(B6/CAST)	B6/CAST=P/M
OB_M1	27.1659	27.7693	0.603321	-0.0497872	0.966079	0.75699	0.430845
OB_M2	28.141	29.3066	1.1656	-0.586037	0.666171		0.569155
OB_M3	28.6755	30.0335	1.35793	-0.769463	0.586636
OB_M4	29.6641	30.8462	1.18217	-0.601833	0.658916
OB_M5	27.3081	28.0066	0.698534	-0.140592	0.907147
Sample	B6/CAST=M/P	B6/total (M)	CAST/total (P)	Ave
OB_S1	0.427399	0.299425	0.700575	0.514281
OB_S2	1.03201	0.507876	0.492124	STD
OB_S3	1.06946	0.516781	0.483219	0.0937364
OB_S4	0.824823	0.452002	0.547998	STE
OB_S5	1.00205	0.500513	0.499487	0.0296421
Sample	B6/CAST=P/M	B6/total (P)	CAST/total (M)	Ave
OB_M1	0.966079	0.491373	0.508627	0.485719	-0.485719
OB_M2	0.666171	0.399821	0.600179	STE
OB_M3	0.586636	0.369736	0.630264	0.0937364
OB_M4	0.658916	0.397197	0.602803	STE
OB_M5	0.907147	0.475657	0.524343	0.0296421
FosB_MOE
Sample	FAM	VIC	delta Ct=VIC-FAM	Log2(B6/CAST)	B6/CAST=M/P	AVE	Ratios
OB_S1	28.6233	30.3349	1.71169	-1.21069	0.432062	0.412348	0.291959
OB_S2	26.6801	28.3547	1.67461	-1.18319	0.440377		0.708041
OB_S3	25.4173	27.2488	1.83157	-1.29959	0.40624
OB_S4	26.9327	28.7553	1.82257	-1.29292	0.408125
OB_S5	26.4256	28.4132	1.98756	-1.41528	0.374938
Sample	FAM	VIC	delta Ct=VIC-FAM	Log2(B6/CAST)	B6/CAST=P/M
OB_M1	27.3383	29.149	1.81075	-1.28415	0.410611	0.409575	0.290567
OB_M2	27.0758	28.825	1.74926	-1.23855	0.423798		0.709434
OB_M3	27.1695	28.9674	1.79793	-1.27465	0.413326
OB_M4	28.716	30.5844	1.86843	-1.32693	0.398616
OB_M5	29.0632	30.9174	1.85428	-1.31644	0.401526
Sample	B6/CAST=M/P	B6/total (M)	CAST/total (P)	Ave
OB_S1	0.432062	0.301706	0.698294	0.500617
OB_S2	0.440377	0.305738	0.694262	STD
OB_S3	0.40624	0.288884	0.711116	0.220337
OB_S4	0.408125	0.289836	0.710164	STE
OB_S5	0.374938	0.272694	0.727306	0.0696766
Sample	B6/CAST=P/M	B6/total (P)	CAST/total (M)	Ave
OB_M1	0.410611	0.291087	0.708913	0.499383	-0.499383
OB_M2	0.423798	0.297653	0.702347	STE
OB_M3	0.413326	0.292449	0.707551	0.220337
OB_M4	0.398616	0.285007	0.714993	STE
OB_M5	0.401526	0.286492	0.713508	0.0696766
Phf7_MOE
Sample	FAM	VIC	delta Ct=VIC-FAM	Log2(B6/CAST)	B6/CAST=M/P	AVE	Ratios
OB_S1	27.6283	28.0937	0.465373	0.116946	1.08444	1.06761	0.516351
OB_S2	27.4395	27.9296	0.490032	0.0887484	1.06345		0.483649
OB_S3	26.3636	26.8986	0.534979	0.0373515	1.02623
OB_S4	26.4048	26.8459	0.441132	0.144666	1.10547
OB_S5	26.7259	27.2218	0.495936	0.0819972	1.05848
Sample	FAM	VIC	delta Ct=VIC-FAM	Log2(B6/CAST)	B6/CAST=P/M
OB_M1	26.132	26.748	0.61599	-0.0552846	0.962405	0.993167	0.498286
OB_M2	26.0534	26.6214	0.567977	-0.000381699	0.999735		0.501714
OB_M3	26.0221	26.6891	0.666949	-0.113556	0.924307
OB_M4	27.5424	28.0322	0.489868	0.0889359	1.06359
OB_M5	25.5662	26.1141	0.547863	0.0226187	1.0158
Sample	B6/CAST=M/P	B6/total (M)	CAST/total (P)	Ave
OB_S1	1.08444	0.520254	0.479746	0.509134
OB_S2	1.06345	0.515374	0.484626	STD
OB_S3	1.02623	0.506472	0.493528	0.0125373
OB_S4	1.10547	0.525048	0.474952	STE
OB_S5	1.05848	0.514205	0.485795	0.00396464
Sample	B6/CAST=P/M	B6/total (P)	CAST/total (M)	Ave
OB_M1	0.962405	0.490421	0.509579	0.490866	-0.490866
OB_M2	0.999735	0.499934	0.500066	STE
OB_M3	0.924307	0.480332	0.519668	0.0125373
OB_M4	1.06359	0.515407	0.484593	STE
OB_M5	1.0158	0.503919	0.496081	0.00396464
Cyp1a1_MOE
Sample
Mean Ct value	FAM	VIC	delta Ct=VIC-FAM	Log2(B6/CAST)	B6/CAST=M/P	AVE	Ratios
OB_S1	25.0684	25.2625	0.194153	-0.179669	0.882905	0.951511	0.487576
OB_S2	24.8461	25.229	0.382873	-0.354311	0.782243		0.512424
OB_S3	24.3228	24.3777	0.05486	-0.0507674	0.965423
OB_S4	25.1352	24.9299	-0.205276	0.189962	1.14073
OB_S5	24.3877	24.4093	0.021588	-0.0199775	0.986248
Mean Ct value	FAM	VIC	delta Ct=VIC-FAM	Log2(B6/CAST)	B6/CAST=P/M
OB_M1	24.8468	24.6512	-0.195634	-0.195634	0.873189	0.783697	0.439367
OB_M2	25.0448	24.5816	-0.463237	-0.463237	0.725357		0.560633
OB_M3	24.9846	24.3248	-0.659794	-0.659794	0.632969
OB_M4	28.7749	28.3878	-0.387121	-0.387121	0.764654
OB_M5	24.9989	24.8822	-0.116665	-0.116665	0.922317
Sample	B6/CAST=M/P	B6/total (M)	CAST/total (P)	Ave
OB_S1	0.882905	0.468906	0.531094	0.524114
OB_S2	0.782243	0.438909	0.561091	STD
OB_S3	0.965423	0.491204	0.508796	0.0527246
OB_S4	1.14073	0.532871	0.467129	STE
OB_S5	0.986248	0.496538	0.503462	0.016673
Sample	B6/CAST=P/M	B6/total (P)	CAST/total (M)	Ave
OB_M1	0.873189	0.466151	0.533849	0.475886	-0.475886
OB_M2	0.725357	0.42041	0.57959	STE
OB_M3	0.632969	0.387618	0.612382	0.0527246
OB_M4	0.764654	0.433317	0.566683	STE
OB_M5	0.922317	0.479795	0.520205	0.016673
