# Supplementary material for: Trappc9 deficiency causes parent-of-origin dependent microcephaly and obesity
Source: PLoS Genet. 2020 Sep 2;16(9):e1008916. doi: 10.1371/journal.pgen.1008916 (PMC7467316; doi:10.1371/journal.pgen.1008916)
Supplement: S4 Data — (XLSX) [file pgen.1008916.s021.xlsx]

## Sheet: QPCR
Trappc9: OB
+/+	m+/p-	m-/p+	-/-
0.0118457	0.00821832	0.00499225	0.00239572
0.0104282	0.00829657	0.00465671	0.0027974
0.0108348	0.00782951	0.00492765	0.00316385
0.0123977	0.00785246	0.00513998	0.0030706
0.0109306	0.00821441	0.00632816	0.00253241
Trappc9: MOE
+/+	m+/p-	m-/p+	-/-
0.00941113	0.00569606	0.00507974	0.000862073
0.00803108	0.00552174	0.00515698	0.000638897
0.00809451	0.00556864	0.00459725	0.000517444
0.00761806	0.00523362	0.00476012	0.000872441
0.0072663	0.00495269	0.00382987	0.000871612
